# Supplementary material for: Aspergillus dsRNA virus drives fungal fitness and pathogenicity in the mammalian host
Source: Research Square preprint supplement (doi:10.21203/rs.3.rs-3961709/v1), 2024-03-13
Supplement: Supplementary file 1 [file 9db24d20084f9ae7c08df224.xlsx]

## Sheet: NS_17998_220323
Protein	Organism	Description	Combined Total Peptides	p-value VC_H2O2/ VC	q-value VC_H2O2/ VC	Ratio VC_H2O2/ VC	p-value Af293_H2O2/ Af293	q-value Af293_H2O2/ Af293	Ratio Af293_H2O2/ Af293	p-value Af293/VC	q-value Af293/VC	Ratio Af293/VC	p-value VC_H2O2/ Af293_H2O2	q-value VC_H2O2/ Af293_H2O2	Ratio VC_H2O2/ Af293_H2O2	Intensity: VC 1	Intensity: VC 2	Intensity: VC 3	Intensity: VC_1 H2O2	Intensity: VC_2 H2o2	Intensity: VC_3 H2O2	Intensity: Af293 1	Intensity: Af293 2	Intensity: Af293 3	Intensity: Af293_1 H2o2	Intensity: Af293_2 H2O2	Intensity: Af293_3 H202	Combined Spectral Count	Combined Unique Spectral Count	Combined Total Spectral Count	Protein Probability
XP_754348.1	Aspergillus fumigatus Af293	transcription factor TFIIIB complex subunit Brf1, putative	6	0.00197872	0.0389885	12.6804	0.609383	0.749169	0.650687	0.00233235	0.36224	10.9813	0.502195	0.903358	1.77462	14745.9	24137.7	7765.25	206718	137379	198436	123470	162802	182081	224020	208298	21608.7	35	35	35	1
XP_746888.1	Aspergillus fumigatus Af293	C6 transcription factor, putative	2	0.181677	0.255788	4.60297	0.0636297	0.146347	0.13996	0.0303049	0.351235	8.35655	0.256634	0.780998	3.93557	81902.3	13908.1	10494.1	217699	26329.5	203387	193658	210456	171156	11066	124094	13927.1	7	7	7	0.9714
XP_746633.1	Aspergillus fumigatus Af293	conserved hypothetical protein	4	0.539546	0.674592	0.541393	2.47868e-05	0.2	0.115765	0.147461	0.482979	5.13815	0.48317	0.896297	0.910187	16785.8	15161.5	245039	19347.5	25859.3	19779.5	186676	227304	199362	23384.6	27135.4	20682.4	10	10	10	1
XP_751602.1	Aspergillus fumigatus Af293	ESCRT-II complex component (Vps25), putative	3	0.0259543	0.0634815	3.53071	0.133036	0.237055	0.44455	0.00124033	0.360286	5.05189	0.440278	0.878882	1.57213	7980.97	13012.1	8715.29	17604.3	45093.7	50181.1	63402.8	43315.9	42490.5	22792.3	10426.1	43141.8	14	14	14	1
XP_747667.2	Aspergillus fumigatus Af293	Mis6 domain protein	5	0.00189379	0.0389942	8.07257	0.0412258	0.122345	0.23958	0.0452546	0.365304	4.25732	0.00108256	0.464333	7.91454	13446.6	15255.1	28621.8	105053	161945	181545	50628.4	47733.2	187463	13630.1	17995	25399.8	19	19	19	1
XP_754127.1	Aspergillus fumigatus Af293	thioredoxin Trx1, putative	3	0.55572	0.69171	1.16272	0.00940914	0.0645348	0.37803	0.00380184	0.294723	3.98064	0.29467	0.79255	0.772675	10995.1	18681.1	22557.4	17741.8	23393.1	17548.2	56770.1	70955.6	72550.5	20436	20970.3	36840.6	16	16	16	0.9995
XP_753581.1	Aspergillus fumigatus Af293	voltage-gated chloride channel, putative	4	0.0563355	0.103003	4.07344	0.105987	0.196971	0.185484	0.0587499	0.380976	3.95974	0.102415	0.712598	5.54612	143556	27170.2	33629.1	224340	179482	220185	184871	217756	202296	187108	14968.1	18556	12	12	12	0.9965
XP_747804.1	Aspergillus fumigatus Af293	MFS transporter, putative	4	0.00652888	0.0385714	4.08727	0.628998	0.764725	0.855903	0.0137591	0.330676	3.14896	0.231559	0.768025	1.5165	11138.6	15774.3	26915.9	68503.8	59066.4	79805.3	54625.8	61101.7	44242.1	62613.8	57371.9	25774.6	29	29	29	1
XP_753760.1	Aspergillus fumigatus Af293	conserved hypothetical protein- Ribosomal protein L24E	3	0.0237528	0.0612652	2.83667	0.126963	0.229711	0.442732	0.030437	0.352803	3.06175	0.128889	0.713962	2.09266	19293.9	13448.1	35707.7	53985.7	57439.5	68199	73149.7	81714.8	44487.3	32156.4	51338.2	13978.6	23	23	23	1
XP_751486.1	Aspergillus fumigatus Af293	RNA methyltransferase, TrmH family family	5	0.0327736	0.0716141	2.51507	0.219067	0.343384	0.504467	0.011361	0.31729	2.9739	0.354025	0.832628	1.67645	17727.3	12012.1	9275.22	20434.8	40229	38223.2	41806.6	27317.6	45486.3	9871.71	43926	15379.8	11	11	11	1
XP_748920.1	Aspergillus fumigatus Af293	MOSC domain protein	3	0.27819	0.370032	0.418376	0.00331397	0.0577341	0.188729	0.238115	0.566649	2.57975	0.632551	0.937077	0.859312	11463.8	102694	73026.7	24272.8	15628	16597.1	128747	107632	106515	13026.2	24590.9	30975	8	8	8	1
XP_001481470.1	Aspergillus fumigatus Af293	sodium bile acid symporter family protein	3	0.891467	0.942158	1.08824	0.596306	0.739442	0.806393	0.0114245	0.31819	2.56274	0.385234	0.852312	0.526592	21012.8	15919.9	19128.4	11498.8	11216.7	63938.8	46468.4	34294.2	67583.4	46609.9	58908.6	20568.4	13	13	13	0.9999
XP_750387.1	Aspergillus fumigatus Af293	RNA polymerase III subunit C11, putative	2	0.298141	0.394063	1.3252	0.0269729	0.0992286	0.490104	0.0318103	0.348784	2.45538	0.552184	0.915205	1.10122	13720.3	21850	10404.5	17587	17697	23323.1	44031.4	41301.2	25390.2	13952.5	20069.9	19411.6	3	3	3	0.9961
XP_754574.1	Aspergillus fumigatus Af293	conserved hypothetical protein	3	0.060325	0.108699	2.59691	0.00210162	0.05568	0.404181	0.0776976	0.396006	2.44691	0.000391782	0.635	2.62582	23985.1	46480.2	13217.5	57107.9	69375.5	65137.3	74231.4	56218.2	51730.4	23735	21863.6	27468	21	21	21	1
XP_753396.1	Aspergillus fumigatus Af293	U6 small nuclear ribonucleoprotein (Lsm3), putative	3	0.440265	0.569818	1.66356	0.167623	0.28267	0.479882	0.0660665	0.381655	2.22304	0.54076	0.914137	1.5594	20704.1	20301	52502	72460.1	82318.3	17032.2	58574.6	69583.5	59481.1	16629	69595.6	23149.9	22	22	22	1
XP_750161.1	Aspergillus fumigatus Af293	coenzyme A transferase, putative	8	0.0374109	0.076848	3.67878	0.653907	0.785422	0.728992	0.268297	0.591121	2.17011	0.162553	0.75831	2.3254	31193.3	12220.3	45671.1	90968.9	129358	73656.2	106107	72665.3	23076.1	24213.9	103741	27440.2	18	18	25	1
XP_747899.1	Aspergillus fumigatus Af293	nucleolar RNAse III, putative	5	0.440847	0.57037	1.23621	0.00113104	0.04215	0.284768	0.0295329	0.357688	2.14493	0.0162689	0.706051	2.02389	19701.2	31151.8	16735	20403.2	26415	36001.8	50333.5	56225.2	35813.7	15051.4	12878.6	12074.5	13	13	13	1
XP_755311.1	Aspergillus fumigatus Af293	conserved hypothetical protein	2	0.807675	0.887381	0.971326	0.0597835	0.142064	0.490862	0.0190075	0.344516	2.11876	0.77131	0.965984	0.933952	16822.3	18513.7	18076.7	17684	14179	20576.3	49626.1	41752.1	25843.6	12654.5	21517.3	23258.7	22	22	22	0.9991
XP_752750.1	Aspergillus fumigatus Af293	MFS multidrug transporter, putative	4	0.43545	0.564395	1.58679	0.0475892	0.129058	1.85872	0.10278	0.430539	2.10065	0.119908	0.709719	0.406398	11313.4	26813.9	12114.5	16695.4	60699.8	14488.7	44610.1	21391.3	35698.3	62546.4	56976.3	61385	21	21	21	1
XP_755244.1	Aspergillus fumigatus Af293	polyadenylation factor subunit CstF64, putative	2	0.51529	0.650073	1.31772	0.668858	0.795706	0.767269	0.0111193	0.306764	2.02845	0.817269	0.976055	0.846664	17763.5	27584	27602.6	17535.8	60269.3	29281	43617.6	53603.3	48281.2	11818.1	65029.2	66346.7	13	13	13	0.9991
XP_753316.2	Aspergillus fumigatus Af293	BRCT domain protein	5	0.117924	0.180402	0.287617	0.00153976	0.0521263	0.266177	0.30381	0.609742	2.02776	0.0669193	0.662976	0.532878	99716.1	14490.9	67245.9	19906	9478.65	12253	96199.9	111991	75199.8	31994.8	21662.8	22044.2	6	6	6	1
XP_750539.1	Aspergillus fumigatus Af293	heat shock protein Hsp30-like, putative	5	0.00307734	0.0376067	2.80064	0.265323	0.395628	1.67256	0.138343	0.472182	1.99118	0.460175	0.886758	0.840943	8342.66	12126.3	14264.9	32353	29976.4	32687.2	34207.8	28843.2	11546.8	24705	46453.8	46448	46	46	46	1
XP_753538.1	Aspergillus fumigatus Af293	DUF775 domain protein	6	0.230454	0.313026	1.38671	0.0159547	0.0784031	0.518092	0.0562194	0.381539	1.98438	0.0655738	0.667294	1.34882	10237.4	18413.1	21873.6	22018.5	23374	21363.7	37837.7	33338.1	25541.4	13344.2	16874.7	19897.5	11	11	11	1
XP_748111.1	Aspergillus fumigatus Af293	alpha/beta hydrolase, putative	5	0.934089	0.962975	1.0608	0.0355439	0.112841	0.335241	0.199855	0.538364	1.90547	0.465237	0.885753	1.66063	15980.7	59483.3	44998.9	62519.2	12644.6	64590.9	72430.7	79088.8	51660.6	16084.8	16185.2	42828.6	15	15	15	1
XP_754599.1	Aspergillus fumigatus Af293	conserved hypothetical protein	2	0.000504597	0.0349538	5.00795	0.916484	0.952408	1.05732	0.0955091	0.421193	1.89301	0.101572	0.711281	2.50209	22107	19983.5	19412.5	84772.8	138336	91848.2	21896.8	46678.2	56917.3	21831.4	87413.8	36032.3	5	5	5	0.999
XP_750799.1	Aspergillus fumigatus Af293	MFS multidrug transporter, putative	3	0.0570457	0.104468	1.64556	0.00460531	0.0550742	0.451089	0.00241756	0.317655	1.87773	0.0365246	0.719841	1.94275	21659.8	21417.9	27885.6	36615.1	29815.9	52801.2	46143.9	44935.9	41305.3	21260.7	15332.4	24116.3	36	36	36	1
XP_747636.1	Aspergillus fumigatus Af293	mitochondrion biogenesis protein Mmm1, putative	5	0.99465	0.99643	1.00494	0.0184898	0.0813071	0.717622	0.198085	0.53518	1.87694	0.630278	0.937596	0.74609	17393.4	56859.7	59484.9	71147.1	12750.9	65813.3	67885.4	83860.5	68330.7	57906.3	50896.7	48777.8	27	27	27	1
XP_751179.1	Aspergillus fumigatus Af293	AP-3 adaptor complex subunit sigma, putative	2	0.246819	0.332739	1.37064	0.167043	0.282174	0.702268	0.0411443	0.360368	1.82279	0.789232	0.969762	1.07074	14453.8	22253.1	27345	21662.9	30601.8	34162.8	33128.8	42903.8	37476.6	29471.4	18063	34656.2	20	20	20	0.9991
XP_752937.1	Aspergillus fumigatus Af293	anaphase-promoting complex component Cut20/Apc4, putative	2	0.864084	0.922714	1.0621	0.4247	0.580784	0.699338	0.065831	0.381279	0.45492	0.0441825	0.67705	3.33843	90170.9	39052	53088.4	48822.2	94669.3	48459.4	38196	20034.7	22999.4	12194.5	13461	36672.1	6	6	6	0.98
XP_750809.1	Aspergillus fumigatus Af293	SIR2 family histone deacetylase, putative	2	0.34354	0.447052	0.684386	0.313055	0.451383	1.42569	0.0160467	0.343465	0.440595	0.84869	0.985074	1.08952	28155.9	28220	38024.2	30317.6	10824	29512.6	10491.5	19246.8	12797	30525.8	12835.7	19111.3	12	12	12	0.9991
XP_754931.1	Aspergillus fumigatus Af293	conserved hypothetical protein	3	0.0681644	0.117145	1.69727	0.00523089	0.0536285	2.89672	0.013992	0.335049	0.436501	0.228884	0.76274	1.34233	38511.3	40888.2	26990.8	48362.9	82912.3	51823.5	13644.2	12628.5	20514.5	49040.3	50431.4	34739.5	23	23	23	1
XP_747619.1	Aspergillus fumigatus Af293	pre-rRNA processing protein, putative	3	0.670006	0.792401	0.812371	0.531969	0.687926	1.13697	0.043835	0.36397	0.411941	0.224315	0.759374	1.73449	52875.8	23012.4	56086.1	48537.8	45635.9	16517.8	17321.5	19764.4	13935.1	25953.5	17664.9	15293.8	16	16	16	0.9998
XP_755284.1	Aspergillus fumigatus Af293	universal stress protein family domain protein	6	0.193495	0.269456	0.7838	0.00263637	0.0587692	2.667	0.00553795	0.327803	0.385621	0.0934645	0.702388	0.762118	34834.6	27797.6	24621	18768.2	28138	21738.3	8519.79	11548.7	13894.5	29928.7	27643.9	31346.3	6	6	6	1
XP_754410.1	Aspergillus fumigatus Af293	dynactin Arp1 p25 subunit	2	0.0904202	0.147485	0.649807	0.554979	0.706184	1.22736	0.0220221	0.347832	0.363549	0.204529	0.758305	1.45629	40256.5	36452.3	36931.4	24761.9	34141.9	17588.9	12324.5	9091.6	23240	14401.2	14435.9	23159.1	18	18	18	0.9999
XP_754159.1	Aspergillus fumigatus Af293	hypothetical protein AFUA_3G14665	2	0.00555714	0.0397847	0.284602	0.84824	0.914295	1.05145	0.0172326	0.345254	0.324176	0.365871	0.838958	0.834961	39726.1	40394.8	79750.8	14997.9	14404.7	13655.8	14551.6	13057.6	22945.9	24294.8	13866.5	15044.2	5	5	5	0.9991
XP_748741.1	Aspergillus fumigatus Af293	lipase/serine esterase, putative	4	0.458457	0.590434	0.575312	0.416348	0.571764	1.76537	0.0234673	0.34892	0.320445	0.985386	0.996315	1.01698	53798.7	64383.2	59814.8	63948.1	69496	8877.22	11919.7	34573	16542.9	53830.4	61480.6	11333.3	21	21	21	0.9992
XP_747964.2	Aspergillus fumigatus Af293	high-affinity iron transporter FtrA	3	0.114749	0.176593	0.391105	0.0513974	0.132099	2.74218	0.03212	0.350215	0.312984	0.171341	0.769127	0.455696	72519.1	80206.5	62691.4	15736.6	69614.1	19913.2	44094.3	18822.1	13470.5	74195.7	52902.3	58731.3	24	24	24	1
XP_752628.1	Aspergillus fumigatus Af293	hypothetical protein AFUA_1G12580	2	0.649579	0.774675	1.08793	0.0414861	0.122773	4.31572	0.0721998	0.394203	0.305162	0.359781	0.836023	0.826071	103692	75424.6	69471.8	76284	112744	81347.4	21446.6	11937.8	60308.4	110566	83261.6	134820	25	25	25	0.9991
XP_755940.1	Aspergillus fumigatus Af293	conserved hypothetical protein	3	0.22774	0.311119	1.12375	0.0476096	0.128925	3.92078	0.056554	0.381742	0.290032	0.942358	0.993612	0.988216	107839	98366.8	103285	116208	132295	101133	19810.5	17838.3	75639.9	101391	103904	152928	24	24	24	0.999
XP_747782.1	Aspergillus fumigatus Af293	chitin synthase activator (Chs3), putative	5	0.116499	0.179011	0.260027	0.142566	0.248005	1.46644	0.000744793	0.387111	0.14341	0.76886	0.965676	1.23644	133845	107308	84989.6	99022.6	20265.1	10694.8	11232.8	16475.2	19454.5	20433.5	29233.2	19007	7	7	7	1
