# Supplementary material for: Aspergillus dsRNA virus drives fungal fitness and pathogenicity in the mammalian host
Source: Research Square preprint supplement (doi:10.21203/rs.3.rs-3961709/v1), 2024-03-13
Supplement: Supplementary file 2 [file a271cae288f7077fe8a41e88.xlsx]

## Sheet: Sheet1
Target gene	Primer sequence	Application
Viral genes
AfuPmV-1M ORF1 (RdRP)	F: CGA TAT AGG GGT CCC AGA GAC C	RT-PCR
	R: GCA TAG GAC TTG AGC CGA AAG G
AfuPmV-1M ORF2	F: AAC CAG GAC GTC GTT TCC TTG G	RT-PCR
	R: AAC AGT GTA TTG AGG GTG TC
AfuPmV-1M ORF1 (RdRP)	F: ACCCGGTGGCTTACAGGAA	q-PCR
	R: GTGAAGTCGCCGAGGTCAA
AfuPmV-1M ORF2	F: CGCGTCGCGCAGTTCT	q-PCR
	R: CCGCTGACGTATGCTATATTGG
AfuPmV-1M ORF3	F: GTTGACCACCAGGACTTCGA	RT- PCR / q-PCR
	R: TTGACGGGGTACATGGCATC
AfuPmV-1M ORF4	F: GACAGTACCATTCCACCTATGG	RT- PCR / q-PCR
	R: AAC TGG TAG GAG CCG TAG AC
AfuPmV-1M ORF5	F: GCCATCCAACACACCCTCAA	RT- PCR / q-PCR
	R: GTTGTGGCCTGGATACACAC
Fungal genes
Arb2	F: GCCCGGAGAGTTTCTTGGA	q-PCR
	R: GCGGCGAGGTGGTAAATG
Arp1	F: TTGCCGGCCTGAAACCTA	q-PCR
	R: CGGAAGACATCCTCGAATTGA
Arp2	F: GAGCGGGAGTCCCTTGAAG	q-PCR
	R: AATGAGACCACCTTGCCAATG
Ayg1	F: ACGGGCATCGTCGATCA	q-PCR
	R: ATCGTCGACCCCATTCAACA
pksP	F: TGCGCTGCCTGAAGAAGTT	q-PCR
	R: TCCACGGCTGCATCTTCAC
Brf1	F: AAGCGGCAATAGCAAAATCG	q-PCR
	R: GCGGCGGCAGTTTCG
C6	F: GCCGTTAAAATGCGAAGCA	q-PCR
	R: AGCCGTGTGAGCAGATCATG
U6	F: GGCCACCCCATGCTTGT	q-PCR
	R: TGGCAAGATGTCCATTCAGTGT
Mis6	F: CTTTCGGTGGCGTCCAATA	q-PCR
	R: GGCGGCCGGTTTGC
tRNA-Arg	F: GGCCTGCTGGCCCAATGGTA	q-PCR
	R: TGACCTACGCAGGATTCGAA
tRNA-Phe	F: GGGGTGATAGCTCAGTTGGG	q-PCR
	R: TGGGGTGAGCCGGGATTGAA
tRNA-Tyr	F: CCCCCGATGGTCTAGTTGGA	q-PCR
	R: TCCCCCGAGCCGGAATCGAG
18S rRNA	F: GGCCCTTAAATAGCCCGGT	q-PCR
	R: TGAGCCGATAGTCCCCCTAA
act1, for gDNA	F: TTT TCC CCC CTT TCC TCA TC	q-PCR
	R: CGT CAG CGA CCA TGA TTC G
act1, for mRNA	F: GTCATGTCTGGTGGTACCACCATGTACC	RT- PCR / q-PCR mRNA
	R: GCTGGAAGGTGGACAGAGAGG
Murine genes
IFNb	F: AACCTCACCTACAGGGC	q-PCR
	R: CATTCTGGAGCATCTCTTGG
IFNg	F: TTGGCTTTGCAGCTCTTCCT	q-PCR
	R: TGACTGTGCCGTGGCAGTA
Il 17a	F: GCTCCAGAAGGCCCTCAGA	q-PCR
	R: AGCTTTCCCTCCGCATTGA
IL-1B	F: TTGACGGACCCCAAAAGATG	q-PCR
	R: TGGACAGCCCAGGTCAAAG
IL-6	F: CCACGGCCTTCCCTACTTC	q-PCR
	R: TTGGGAGTGGTATCCTCTGTGA
IL-18	F: CACATGCGCCTTGTGATGAC	q-PCR
	R: TGCAGCCTCGGGTATTCTGT
Il1a	F: AGGGCAGAGAGGGAGTCAACT	q-PCR
	R: AAC TTT GGC CAT CTT GAT TTC TTT
TNFa	F: TCCAGGCGGTGCCTATGT	q-PCR
	R: GCCCCTGCCACAAGCA
Cxcl1	F: GCAGACCATGGCTGGGATT	q-PCR
	R: CCTGAGGGCAACACCTTCAA
Cxcl2	F: TGGGCTGCTGTCCCTCAA	q-PCR
	R: CCCGGGTGCTGTTTGTTTT
MPO	F: GGCGGGCACCAGAACAG	q-PCR
	R: CAGGTCTAGGGCCACATGTAGAT
Actb	F: CCCTGAAGTACCCCATTGAAC	qPCR
	R: CTTTTCACGGTTGGCCTTAG
