# Supplementary material for: Aspergillus dsRNA virus drives fungal fitness and pathogenicity in the mammalian host
Source: Research Square preprint supplement (doi:10.21203/rs.3.rs-3961709/v1), 2024-03-13
Supplement: Supplementary file 3 [file ad23e1784b49b668811d1d7a.xlsx]

## Sheet: NS_17998_220323
Protein	Organism	Description	Combined Total Peptides	p-value VC_H2O2/ VC	q-value VC_H2O2/ VC	Ratio VC_H2O2/ VC	p-value Af293_H2O2/ Af293	q-value Af293_H2O2/ Af293	Ratio Af293_H2O2/ Af293	p-value VC/ Af293	q-value VC/ Af293	Ratio VC/ Af293	p-value VC_H2O2/ Af293_H2O2	q-value VC_H2O2/ Af293_H2O2	Ratio VC_H2O2/ Af293_H2O2	Intensity: VC 1	Intensity: VC 2	Intensity: VC 3	Intensity: VC_1 H2O2	Intensity: VC_2 H2o2	Intensity: VC_3 H2O2	Intensity: Af293 1	Intensity: Af293 2	Intensity: Af293 3	Intensity: Af293_1 H2o2	Intensity: Af293_2 H2O2	Intensity: Af293_3 H202	Combined Spectral Count	Combined Unique Spectral Count	Combined Total Spectral Count	Protein Probability
XP_749602.1	Aspergillus fumigatus Af293	RNA binding effector protein Scp160, putative	67	0.000133591	0.0151667	0.786962	0.000890774	0.0406667	0.810771	4.40429e-05	0.306	1.11175	0.0548857	0.662246	1.0791	811954	810822	804515	653531	617839	639309	734680	724766	723899	614471	589523	567110	1397	1397	1397	1
XP_750720.1	Aspergillus fumigatus Af293	proteasome component Pre2, putative	16	0.343741	0.447407	1.05286	0.119931	0.220023	0.854503	0.000209751	0.64	0.830956	0.810359	0.976021	1.02385	454397	476575	467862	521324	448472	505775	559740	565194	558169	442588	562191	442800	241	241	241	1
XP_746299.1	Aspergillus fumigatus Af293	ankyrin repeat protein	12	0.289756	0.384239	1.23633	0.728126	0.837435	0.935209	0.000333677	0.4472	0.643168	0.547355	0.914489	0.850259	108028	107323	116778	165963	97075.8	158809	178265	162965	175169	115502	212041	169955	45	45	45	1
XP_748357.2	Aspergillus fumigatus Af293	conserved hypothetical protein	11	0.000604952	0.0334933	1.23075	0.219049	0.343513	0.942281	0.000470063	0.393333	0.774359	0.78515	0.969698	1.01142	193674	185543	198690	237901	233800	239313	241861	253104	251190	243154	243788	217028	142	142	142	1
XP_749444.1	Aspergillus fumigatus Af293	vacuolar ABC heavy metal transporter (Hmt1), putative	13	0.60458	0.734943	1.01794	0.187713	0.310182	0.90307	0.0004804	0.337143	0.854402	0.619568	0.935512	0.963079	48829.2	47809.8	48187.7	51617.7	49548.5	46394.7	55490.4	58052.9	55989.3	46286.6	57368.6	50024.4	101	101	101	1
XP_755357.1	Aspergillus fumigatus Af293	NAD binding Rossmann fold oxidoreductase, putative	17	0.303606	0.399978	1.02534	0.031996	0.106627	0.869497	0.000674113	0.379	0.843768	0.916348	0.989117	0.995001	127249	132070	128185	128347	132489	136564	156948	152621	149712	124266	132444	143234	181	181	181	1
XP_747782.1	Aspergillus fumigatus Af293	chitin synthase activator (Chs3), putative	5	0.116499	0.179011	0.260027	0.142566	0.248005	1.46644	0.000744793	0.387111	6.97303	0.76886	0.965676	1.23644	133845	107308	84989.6	99022.6	20265.1	10694.8	11232.8	16475.2	19454.5	20433.5	29233.2	19007	7	7	7	1
XP_752584.1	Aspergillus fumigatus Af293	translation initiation factor IF3, putative	9	0.000760473	0.0318652	1.25746	0.055322	0.136942	0.92185	0.000757479	0.3484	0.780145	0.0952397	0.709055	1.06417	61596	66724	63958.6	81217.1	79121.9	81334.8	81767.2	84226.6	80385.8	73748.4	79916.8	73586.3	86	86	86	1
XP_751693.1	Aspergillus fumigatus Af293	glycerol-3-phosphate acyltransferase Sct1, putative	24	0.108867	0.169842	0.972366	0.0721554	0.156647	1.14512	0.000759706	0.324	1.13929	0.584065	0.927458	0.96742	143814	148030	143558	142406	142454	138505	125148	127465	129556	154232	130691	153958	270	270	270	1
XP_751733.1	Aspergillus fumigatus Af293	3-ketoacyl-coA thiolase peroxisomal A precursor	15	0.405068	0.52865	0.878109	0.568861	0.718488	0.867104	0.000761625	0.297	0.849772	0.605887	0.933775	0.860557	91436.9	93647.1	89963.3	85585.1	61694.7	98782.4	105162	108604	109918	59105.7	116276	119088	116	116	116	1
XP_754483.1	Aspergillus fumigatus Af293	eukaryotic translation initiation factor 3 subunit EifCe, putative	32	0.00251114	0.039802	1.13127	0.203394	0.325575	0.949363	0.000945264	0.318769	0.892859	0.165184	0.76002	1.06394	848124	878049	879506	964052	1009469	974374	978924	976594	962510	904580	986452	882354	1018	1018	1018	1
XP_751602.1	Aspergillus fumigatus Af293	ESCRT-II complex component (Vps25), putative	3	0.0259543	0.0634815	3.53071	0.133036	0.237055	0.44455	0.00124033	0.360286	0.197946	0.440278	0.878882	1.57213	7980.97	13012.1	8715.29	17604.3	45093.7	50181.1	63402.8	43315.9	42490.5	22792.3	10426.1	43141.8	14	14	14	1
XP_754894.1	Aspergillus fumigatus Af293	MFS transporter, putative	5	0.0251817	0.0628383	1.95248	0.0269388	0.0990787	0.612163	0.00130632	0.349867	0.357901	0.549458	0.91465	1.14152	16500.6	12652.1	10679.5	20212.7	33206.6	24724.4	37891.9	35889	35761.8	22420.1	28553.6	17427.3	21	21	21	1
XP_746520.1	Aspergillus fumigatus Af293	plasma membrane stress response protein (Ist2), putative	14	0.141299	0.208547	1.26631	0.373693	0.525748	1.08891	0.00142533	0.355	0.756503	0.442458	0.878131	0.879749	124998	115209	122495	131800	138060	196854	166436	152324	160716	147958	190899	186255	179	179	179	1
XP_753080.1	Aspergillus fumigatus Af293	translation elongation factor eEF-1B gamma subunit, putative	11	0.0125811	0.0474792	1.38649	0.00251451	0.0603478	1.09091	0.00151201	0.346118	0.880258	0.209765	0.756136	1.11877	160598	155092	151886	197738	250308	203722	177080	177845	176120	193886	196907	188615	136	136	136	1
XP_753738.1	Aspergillus fumigatus Af293	transcription factor RfeG, putative	9	0.00212653	0.0364731	0.654906	0.124753	0.226349	0.803117	0.00161151	0.346667	1.18786	0.812967	0.976456	0.968648	199452	200728	190112	141970	116359	129418	170264	164772	161864	110093	131632	162321	67	67	67	1
XP_752249.1	Aspergillus fumigatus Af293	DUF814 domain protein, putative	7	0.0639917	0.112802	1.06215	0.00496631	0.0531967	0.897577	0.0017244	0.373684	0.862735	0.424568	0.868599	1.02092	213214	217099	217745	225404	240061	223202	242706	258887	249804	226867	223394	223956	132	132	132	1
XP_753905.1	Aspergillus fumigatus Af293	NADPH-dependent FMN/FAD containing oxidoreductase, putative	14	0.0543908	0.101075	1.18607	0.112206	0.207065	0.51641	0.00173495	0.355	0.752482	0.17209	0.767503	1.72827	52014.2	46640.2	48056.7	54387.5	55400.9	64558.6	64926.9	67203.1	62709.6	46943.4	45850.3	17507.2	102	102	102	1
XP_747833.1	Aspergillus fumigatus Af293	60S ribosomal protein L24a	12	0.387165	0.506044	1.01629	0.000449973	0.0483333	1.31669	0.00195859	0.389333	1.1406	0.00690562	0.583415	0.880378	2488728	2619399	2572182	2580851	2639555	2583716	2290677	2215028	2227091	2832011	2961953	3075093	297	297	297	1
XP_755466.1	Aspergillus fumigatus Af293	V-type ATPase F subunit, putative	10	0.000438996	0.0265574	1.14008	0.386908	0.541563	0.946221	0.00198401	0.371636	0.878369	0.364279	0.83773	1.05832	173805	170164	177566	198112	198035	198352	203008	196514	194244	205980	169997	187486	213	213	213	1
XP_753570.1	Aspergillus fumigatus Af293	alpha-1,2-mannosyltransferase (Kre2), putative	16	0.000173065	0.011375	1.33997	0.287109	0.420789	1.08688	0.00211327	0.360667	0.84103	0.617201	0.93599	1.03687	86071.5	84202.9	84424.8	109202	116441	115773	102689	103944	96359.7	118241	115552	96654.7	167	167	167	1
XP_754348.1	Aspergillus fumigatus Af293	transcription factor TFIIIB complex subunit Brf1, putative	6	0.00197872	0.0389885	12.6804	0.609383	0.749169	0.650687	0.00233235	0.36224	0.0910638	0.502195	0.903358	1.77462	14745.9	24137.7	7765.25	206718	137379	198436	123470	162802	182081	224020	208298	21608.7	35	35	35	1
XP_755878.1	Aspergillus fumigatus Af293	sorbitol/xylulose reductase Sou1-like, putative	8	0.0185546	0.0538629	1.24099	0.0174825	0.0802505	0.805908	0.00235628	0.351231	0.792668	0.0489867	0.664325	1.2206	157291	157512	151859	187227	178820	214772	185425	206880	196924	157824	171202	146339	123	123	123	1
XP_752243.1	Aspergillus fumigatus Af293	acetyltransferase, putative	5	0.00319545	0.0381983	1.22427	0.159741	0.271911	0.554901	0.002371	0.338222	0.839847	0.145755	0.73216	1.85295	26185.7	26275.8	27831.9	31254.8	34064.6	33004.8	31183.7	31535.7	32872.3	9436.02	30504	19189.4	13	13	13	1
XP_752769.1	Aspergillus fumigatus Af293	conserved hypothetical protein	10	0.288125	0.382572	1.06382	0.0850041	0.173516	1.29729	0.00238539	0.329	1.24161	0.888851	0.985491	1.01816	262362	244853	240188	247256	286532	262208	207230	196188	198280	321789	249874	218888	149	149	149	1
XP_750799.1	Aspergillus fumigatus Af293	MFS multidrug transporter, putative	3	0.0570457	0.104468	1.64556	0.00460531	0.0550742	0.451089	0.00241756	0.317655	0.532557	0.0365246	0.719841	1.94275	21659.8	21417.9	27885.6	36615.1	29815.9	52801.2	46143.9	44935.9	41305.3	21260.7	15332.4	24116.3	36	36	36	1
XP_749246.1	Aspergillus fumigatus Af293	pirin domain protein, putative	6	0.0146429	0.0489397	1.3996	0.109694	0.203889	0.669926	0.00247085	0.312267	0.625047	0.253254	0.782067	1.30584	29346.7	37249.2	33094.7	46812.7	42685.7	49636.8	53483.3	53192.8	52074.6	40343	45716.9	24150.8	43	43	43	1
XP_754391.1	Aspergillus fumigatus Af293	60S ribosomal protein L22, putative	5	0.288981	0.383666	1.03655	0.0128779	0.0734343	1.15455	0.00277304	0.332258	1.06462	0.358617	0.835658	0.955813	3563647	3553387	3623278	3843383	3793015	3505197	3314155	3393372	3381053	3736336	3779325	4144112	289	289	289	1
XP_747202.2	Aspergillus fumigatus Af293	conserved hypothetical protein	14	0.625428	0.75402	1.01752	0.00683165	0.0582389	1.13739	0.00288808	0.333	1.16602	0.281496	0.788821	1.04314	454007	451356	429887	437824	478606	442878	379905	372036	393147	443688	441171	417690	247	247	247	1
XP_747725.1	Aspergillus fumigatus Af293	short-chain dehydrogenase/reductase family protein, putative	13	0.000896959	0.0323168	1.38373	0.0363199	0.113551	1.11844	0.00295866	0.332606	0.874843	0.168493	0.762012	1.08235	265099	276688	283512	375406	363558	403685	316913	315868	310265	337367	377339	341336	252	226	252	1
XP_748936.1	Aspergillus fumigatus Af293	malate dehydrogenase, NAD-dependent	28	0.802691	0.884423	0.992048	0.0981302	0.188273	1.24409	0.00307535	0.332118	1.15974	0.491562	0.899429	0.924785	5281428	5247949	5146916	4959726	5472990	5131024	4315162	4576183	4631314	6817059	4938285	5231068	1891	1891	1891	1
XP_751696.1	Aspergillus fumigatus Af293	Aha1 domain family	15	0.339379	0.442005	1.05635	0.00655238	0.059516	1.20803	0.00313838	0.329486	1.16162	0.799616	0.972598	1.01577	1072063	1044319	1096481	1060987	1244170	1096184	954163	894033	918085	1183721	1069247	1090836	542	542	542	1
XP_753562.2	Aspergillus fumigatus Af293	ribosome biogenesis protein Urb1, putative	20	0.00823035	0.0401542	1.17566	0.107425	0.199399	1.10636	0.00317512	0.325889	0.918047	0.689158	0.935949	0.975545	60872	58654.3	58697.2	66643.6	74031.3	69024.1	65033.1	65102.6	63974.7	67276.7	69215.4	78770.8	124	124	124	1
XP_753517.1	Aspergillus fumigatus Af293	thioredoxin TrxA	8	0.0534788	0.0997577	0.902006	0.0107306	0.0687758	1.1932	0.00325541	0.325189	1.17887	0.0740307	0.68819	0.891174	3252126	3386484	3118321	2981752	2767585	3054166	2758522	2705654	2808610	3235239	3113386	3535397	458	458	458	1
XP_749456.1	Aspergillus fumigatus Af293	conserved hypothetical protein	6	0.00801501	0.0408018	1.18278	0.204039	0.326107	1.03933	0.00329546	0.316632	0.876705	0.95374	0.994658	0.997711	64089.8	67211.2	67892.6	81335.2	80310.5	74083	77191.9	74270.2	75701.8	82031	78354.4	75807.9	49	49	49	1
XP_748547.1	Aspergillus fumigatus Af293	aromatic-L-amino-acid decarboxylase, putative	18	0.0225639	0.0599701	1.09876	0.0200377	0.0845212	0.868322	0.00334033	0.318256	0.857005	0.10388	0.70861	1.08444	112673	119128	113525	122832	125441	131185	135776	129755	137414	117318	123127	109723	231	231	231	1
XP_752051.1	Aspergillus fumigatus Af293	small nuclear ribonucleoprotein SmB, putative	12	0.000766849	0.0315111	1.27186	0.0588938	0.141422	1.11885	0.00338387	0.3103	0.858975	0.615685	0.936009	0.97645	520119	506083	524064	633024	686870	652729	625459	600351	579645	639969	658784	723061	222	222	222	1
XP_750279.1	Aspergillus fumigatus Af293	capsular associated protein, putative	4	0.256503	0.345154	0.934043	0.100248	0.190232	1.13575	0.00341784	0.306537	1.22817	0.895845	0.989723	1.01005	39044.8	39075.6	40991.2	40164.4	33916.7	37411.5	31127	31702.8	34209.8	40361	36366.8	33695.3	17	17	17	1
XP_749045.1	Aspergillus fumigatus Af293	proteasome component Pre3, putative	11	0.00222197	0.0364444	1.1245	0.00957001	0.0655	1.12477	0.00346509	0.302571	0.906997	0.0194294	0.714237	0.906774	353203	360908	357717	412462	402287	390765	383108	402248	396577	426638	444967	458090	226	226	226	1
XP_754806.1	Aspergillus fumigatus Af293	aconitate hydratase, putative	7	0.205234	0.285044	1.0398	0.0159162	0.0785569	1.19678	0.00362577	0.314233	1.1309	0.730368	0.955238	0.98257	227341	222004	220846	229250	243440	224534	196692	191892	204179	253776	236357	220229	134	134	134	1
XP_753677.1	Aspergillus fumigatus Af293	tRNA methyltransferase subunit	14	0.00380869	0.0354406	1.20698	0.571905	0.721342	0.960838	0.00364517	0.307091	0.836016	0.498306	0.901767	1.05018	54100.2	54384.8	50367.9	62015.2	66176.4	63493.9	64493.9	64103.1	61346.5	63720.6	53687.2	65763.8	126	126	126	1
XP_752016.2	Aspergillus fumigatus Af293	conserved hypothetical protein	9	0.00101566	0.0320678	1.37768	0.271363	0.403178	1.06288	0.00374318	0.307822	0.812334	0.361282	0.837655	1.05292	84984.6	86894.9	89082.4	113834	128046	118014	113054	101373	107082	121599	112795	107439	71	71	71	1
XP_750971.1	Aspergillus fumigatus Af293	protein phosphatase 2A catalytic subunit Pph21, putative	12	0.663329	0.786632	0.979781	0.00838122	0.0620819	0.833679	0.00378884	0.30113	0.882678	0.531677	0.911714	1.03737	344333	352382	366500	371658	324087	347255	395475	399935	408838	325280	359599	320317	265	265	265	1
XP_754127.1	Aspergillus fumigatus Af293	thioredoxin Trx1, putative	3	0.55572	0.69171	1.16272	0.00940914	0.0645348	0.37803	0.00380184	0.294723	0.251216	0.29467	0.79255	0.772675	10995.1	18681.1	22557.4	17741.8	23393.1	17548.2	56770.1	70955.6	72550.5	20436	20970.3	36840.6	16	16	16	0.9995
XP_749964.1	Aspergillus fumigatus Af293	glycogen debranching enzyme	13	0.786414	0.874047	0.974744	0.00664838	0.0587038	0.750952	0.00382165	0.290167	0.762601	0.918937	0.989208	0.989865	47404.6	49460.5	52022.2	55497	41514.2	49031.4	61573.6	69615.4	64161.8	48524.6	52681.1	45561.3	38	38	38	1
XP_751106.1	Aspergillus fumigatus Af293	NADH-ubiquinone oxidoreductase 213 kDa subunit	17	0.000688689	0.0336585	1.12592	0.653653	0.785517	1.02798	0.00383386	0.285796	0.921798	0.874266	0.986573	1.00962	1620790	1623964	1633505	1787380	1861167	1844766	1718105	1781696	1793219	2006329	1793203	1657441	629	629	629	1
XP_755046.1	Aspergillus fumigatus Af293	OTU-like cysteine protease, putative	6	0.0332103	0.0716752	0.924206	0.0142323	0.0766751	0.78981	0.00383934	0.28008	0.881886	0.618413	0.93606	1.03195	211512	208806	222500	200737	201280	191993	243962	239236	245483	211942	190951	174421	51	51	51	1
XP_752410.2	Aspergillus fumigatus Af293	conserved hypothetical protein	30	0.102664	0.162805	1.04645	0.00831759	0.0613765	1.22095	0.00417022	0.296462	1.19362	0.554798	0.914946	1.02303	297267	315879	311002	324094	327589	315199	260614	267313	246498	301696	336435	307932	248	248	248	1
XP_749216.1	Aspergillus fumigatus Af293	conserved hypothetical protein	2	0.685149	0.802734	1.02695	0.0477418	0.128914	0.476152	0.00427978	0.294566	0.806962	0.106975	0.704505	1.74044	48822.7	47212.8	44064.5	50240.1	43107.4	50795	55944.4	57486.2	60102.1	16381.1	38015	33508.2	14	14	14	0.9991
XP_749635.1	Aspergillus fumigatus Af293	glycerol:H+ symporter (Gup1), putative	6	0.0209047	0.0577866	1.08769	0.936228	0.963096	0.995048	0.0044871	0.295259	0.892213	0.69502	0.935703	0.975285	62355.6	61038.6	60850.3	69222	64284.1	66975.5	70271.3	69912.7	66374.7	65875.5	76395.6	63837.6	25	25	25	1
XP_752215.1	Aspergillus fumigatus Af293	nuclear pore complex subunit (SEC13), putative	12	0.0645143	0.113037	1.07579	0.176403	0.29422	0.923249	0.00463693	0.300945	0.905126	0.378876	0.850563	1.05467	422705	435196	422746	452452	442115	484033	477305	458161	479578	447713	463632	397609	321	321	321	1
XP_754879.1	Aspergillus fumigatus Af293	SD08430p	2	0.00241018	0.038404	1.80717	0.162472	0.274749	0.842713	0.00473208	0.304786	0.622101	0.0485675	0.67585	1.33407	21012.2	26950.3	25509.4	47175	40723.7	44378.3	41438.8	36651.6	39504.9	34969	37375.2	27474.1	18	18	18	0.9991
XP_752798.1	Aspergillus fumigatus Af293	C6 finger domain protein, putative	9	0.0160617	0.0498771	0.727797	0.00124838	0.0437209	0.616666	0.0048392	0.302877	0.793433	0.507266	0.904928	0.936419	69908.7	65357	65990.9	49325.1	42533.5	55403.6	86640	88363.4	78847.1	56856	51678.7	48177	69	69	69	1
XP_753224.1	Aspergillus fumigatus Af293	12-oxophytodienoate reductase, putative	19	0.322441	0.424032	0.991968	0.67978	0.805236	0.990047	0.00499921	0.311103	1.0995	0.00417285	0.544	1.10164	684824	680086	681398	684615	668577	676766	640116	617233	604288	627269	619055	596674	239	239	239	1
XP_750243.1	Aspergillus fumigatus Af293	small monomeric	17	0.126749	0.193198	0.960032	0.000971457	0.0436522	0.834339	0.00515423	0.31322	0.928705	0.0671786	0.660096	1.06861	1022582	1049775	1021941	1002217	953458	1015814	1091879	1130182	1109849	956203	927076	897323	571	571	571	1
XP_754393.2	Aspergillus fumigatus Af293	recombination hotspot-binding protein (Translin), putative	12	0.00591994	0.0406557	1.18336	0.140588	0.245168	1.07857	0.0054493	0.3286	0.932307	0.67613	0.93835	1.02289	143748	150264	147206	165736	183110	173623	157588	157917	157672	156663	176705	177844	179	179	179	1
XP_755284.1	Aspergillus fumigatus Af293	universal stress protein family domain protein	6	0.193495	0.269456	0.7838	0.00263637	0.0587692	2.667	0.00553795	0.327803	2.59322	0.0934645	0.702388	0.762118	34834.6	27797.6	24621	18768.2	28138	21738.3	8519.79	11548.7	13894.5	29928.7	27643.9	31346.3	6	6	6	1
XP_752192.1	Aspergillus fumigatus Af293	4F5 domain protein	4	0.00481476	0.0377248	0.726744	0.00885384	0.0622921	0.793838	0.00573169	0.332258	1.28399	0.0497358	0.667631	1.17547	429516	425580	445322	309662	289262	348818	319040	327239	368329	263246	262249	278655	51	51	51	1
XP_753787.1	Aspergillus fumigatus Af293	spermine/spermidine synthase family protein	15	0.00517341	0.0385656	1.2434	0.176569	0.294193	1.06888	0.00575655	0.326984	0.862538	0.948977	0.994889	1.00337	115222	123694	124072	156036	141390	154082	138922	143852	137891	145453	143037	161748	196	196	196	1
XP_755432.1	Aspergillus fumigatus Af293	chromatin remodeling complex subunit (Arp8), putative	22	0.0134246	0.0476187	1.19391	0.0246892	0.0957587	0.833695	0.00582872	0.321875	0.799915	0.0595508	0.666912	1.14553	113330	121006	130628	146861	142625	145546	151719	150090	153696	117340	139609	123800	147	147	147	1
XP_755235.1	Aspergillus fumigatus Af293	DNA ligase Cdc9, putative	8	0.59922	0.73112	1.02117	0.00448979	0.0558565	0.759203	0.00601783	0.322154	0.830177	0.0878448	0.699276	1.11663	59292	65794.4	61347.4	65065.4	60910.9	64302.3	73485.1	73575.4	77363.9	52112.6	57990.7	60567.9	76	76	76	1
XP_751011.1	Aspergillus fumigatus Af293	synaptobrevin-like protein Sybl1, putative	10	0.00207709	0.0378994	1.23085	0.372821	0.525575	0.923047	0.00609091	0.319091	0.836535	0.234296	0.767818	1.11549	148279	153658	141000	185964	182519	176496	184503	173244	171688	174305	177204	139729	116	116	116	1
XP_751969.1	Aspergillus fumigatus Af293	mitochondrial peroxiredoxin Prx1, putative	18	0.000459794	0.0294375	0.890148	0.468071	0.626154	1.05047	0.00614497	0.321313	1.09349	0.273664	0.783455	0.926606	4011019	3984613	3917875	3566169	3564057	3474818	3528916	3648071	3719997	3884793	3414045	4185591	1065	1065	1065	1
XP_750470.1	Aspergillus fumigatus Af293	6-phosphofructo-2-kinase 1	12	0.214931	0.296787	1.06372	0.163505	0.276867	0.909355	0.00615944	0.316588	0.804573	0.342235	0.821862	0.941148	83783.8	77462.2	77659.1	90452.1	81927.5	81860	104876	98284.5	93882.6	82134.2	94698.6	93557.7	97	97	97	1
XP_754641.2	Aspergillus fumigatus Af293	conserved hypothetical protein	5	0.077139	0.128353	1.13936	0.00175655	0.0527778	1.64239	0.00621486	0.312	1.36705	0.448142	0.880672	0.948349	128453	110842	122800	135072	146441	130738	93518.6	89658.2	81622.1	154533	130213	150679	62	62	62	1
XP_751924.1	Aspergillus fumigatus Af293	mRNA splicing protein (Prp39), putative	33	0.00153722	0.0382484	1.09784	0.691327	0.814481	0.990325	0.00635036	0.3128	0.943078	0.128366	0.71177	1.04546	229654	232965	236878	258193	251799	257935	244649	246705	250337	243117	254995	236719	555	555	555	1
XP_749576.1	Aspergillus fumigatus Af293	HECT domain protein	5	0.62863	0.757751	0.949434	0.0787887	0.164202	0.258068	0.00649193	0.313521	0.573137	0.264819	0.784904	2.10857	174435	189222	154676	177975	139296	176247	252390	339557	316422	25031	155290	119904	15	15	15	1
XP_752861.1	Aspergillus fumigatus Af293	peptidase D, putative	10	0.115804	0.177818	0.794228	0.0166631	0.0793624	0.624995	0.00663519	0.314556	0.685762	0.406099	0.85965	0.87145	53190.2	60442	58314.7	38823.6	43221.9	55973.7	76872.2	94282.2	80210	42653.3	56756	58626.3	60	60	60	1
XP_750219.2	Aspergillus fumigatus Af293	Ras guanyl-nucleotide exchange factor RasGEF, putative	8	0.532101	0.667333	0.976278	0.0506967	0.13101	1.13545	0.00664498	0.311288	1.1519	0.859526	0.984364	0.990422	141880	133805	130607	132266	126450	137948	119935	117560	115057	138874	122099	140051	36	36	36	1
XP_754980.1	Aspergillus fumigatus Af293	translation initiation factor SUI1, putative	10	0.0113162	0.0454954	0.79995	0.0591479	0.141694	0.927707	0.00725951	0.327459	1.12469	0.593778	0.933457	0.969807	637686	654027	624404	558936	503771	473436	589819	556144	558036	509701	522838	548427	330	330	330	1
XP_753262.1	Aspergillus fumigatus Af293	FAD dependent oxidoreductase superfamily	3	0.452736	0.585681	0.885349	0.137866	0.243037	1.58085	0.00730454	0.32576	2.15257	0.486299	0.895778	1.20554	29357.8	36460.9	37626.2	35581.5	33052.1	23766.3	12479.2	19524.5	16573.1	30167.8	31934.8	16559	24	24	24	1
XP_754916.2	Aspergillus fumigatus Af293	protein translocation complex subunit Sss1, putative	2	0.136902	0.204605	0.859423	0.0337933	0.110828	1.36734	0.00730576	0.321474	1.35168	0.223123	0.759008	0.849582	336640	342843	375794	331963	317890	260894	255775	240902	285029	392220	299779	381843	54	54	54	1
XP_746478.1	Aspergillus fumigatus Af293	conserved hypothetical protein	8	0.449249	0.580756	0.975785	0.0551813	0.137225	0.928365	0.00733034	0.318338	0.944301	0.85579	0.983374	0.992536	69161.8	69629.4	67286.6	69368.7	63501.2	68344.6	72375.2	72446.5	73391.9	65413.3	71305.8	66011.6	89	89	89	1
XP_754422.1	Aspergillus fumigatus Af293	C6 transcription factor (Mut3), putative	8	0.466205	0.599947	0.894395	0.389124	0.542526	0.811912	0.00745385	0.315282	0.826289	0.729708	0.955689	0.910233	19427.7	21741	19438.4	14485.1	17652.3	22973.4	24102.2	24716.8	24429.7	13546.5	20110.3	28592.3	22	22	22	1
XP_754571.1	Aspergillus fumigatus Af293	meiotic sister chromatid recombination protein Ish1/Msc1, putative	8	0.36754	0.479993	1.10339	0.140999	0.245922	0.740355	0.00746263	0.311291	0.641223	0.801283	0.973287	0.955645	70364.6	81008.9	65887.8	85291	68479.2	86379.7	99949.6	114184	124819	70180.4	112545	73188.2	87	87	87	1
XP_750677.1	Aspergillus fumigatus Af293	catabolite repressor protein (CreC), putative	8	0.00290189	0.0370345	0.748345	0.326033	0.469258	0.935639	0.00749493	0.3101	1.22266	0.739128	0.956183	0.977911	41201.6	44545.3	39694	30993.8	32983.7	29865.7	35101.5	32738.7	34684.6	31473.1	35421.5	29284.8	23	23	23	1
XP_754952.1	Aspergillus fumigatus Af293	3'-phosphoadenosine-5'-phosphosulfate reductase Met16, putative	16	0.810515	0.889344	0.984284	0.229397	0.355067	0.974443	0.0075311	0.310815	1.11354	0.125209	0.705104	1.12478	145818	151510	153312	148182	163796	133072	137469	136389	130837	133590	131620	129088	170	170	170	1
XP_753904.1	Aspergillus fumigatus Af293	electron transfer flavoprotein, beta subunit, putative	25	0.00100249	0.0329043	0.835427	0.0354194	0.113115	0.912044	0.00763018	0.310244	1.08141	0.785108	0.969988	0.99056	470379	487168	479467	385865	405992	408938	453688	437509	437699	401229	386994	424494	456	444	456	1
XP_753544.1	Aspergillus fumigatus Af293	pantoate--beta-alanine ligase	20	0.322411	0.424104	0.942061	0.0645777	0.146808	1.24032	0.00764806	0.30747	1.24482	0.567038	0.918881	0.945478	165531	142824	154253	145144	153031	137270	126442	122517	122042	172833	130318	160165	312	312	312	1
XP_751155.1	Aspergillus fumigatus Af293	proteasome regulatory particle subunit (RpnI), putative	18	0.000193269	0.0101111	1.23931	0.246334	0.375155	1.03872	0.00777532	0.310333	0.875764	0.0732638	0.690754	1.04489	347654	360224	351512	433921	448481	430570	423039	397412	389832	420837	427281	408472	454	454	454	1
XP_747410.1	Aspergillus fumigatus Af293	flavohemoprotein, putative	14	0.000909378	0.0330485	0.688883	0.00715256	0.0594528	0.868018	0.00783643	0.310776	1.20232	0.242402	0.773345	0.954194	238103	258900	241968	170352	179284	159663	195336	204760	214570	179177	178649	175347	144	144	144	1
XP_753180.1	Aspergillus fumigatus Af293	pyrroline-5-carboxylate reductase	17	0.366532	0.478596	1.0532	0.274577	0.406482	1.08882	0.00802069	0.318698	1.1565	0.228819	0.762789	1.11867	355865	377988	362713	360547	422356	374300	301554	321045	325803	328141	318386	389710	222	222	222	1
XP_749989.1	Aspergillus fumigatus Af293	alpha/beta hydrolase, putative	5	0.000742801	0.0337619	0.786165	0.908536	0.947329	1.00681	0.00814009	0.317149	1.1821	0.18978	0.755189	0.923035	117655	126999	118711	96308.5	93433.5	95780.4	100588	107452	99353.1	94859	112725	102493	56	56	56	1
XP_753301.1	Aspergillus fumigatus Af293	exosome complex subunit Csl4, putative	7	0.448862	0.580959	1.02622	0.000743334	0.042963	0.818769	0.00824947	0.313545	0.894679	0.0185122	0.722652	1.12137	145653	153308	143454	149404	158295	146384	168322	162358	163675	138836	135698	130318	48	48	48	1
XP_750788.1	Aspergillus fumigatus Af293	PHD finger domain protein, putative	21	0.0477386	0.0912753	1.04882	0.0664651	0.148961	1.21428	0.008357	0.317528	1.07154	0.377603	0.849674	0.925532	154245	154088	157585	162758	167293	158700	143516	148497	142841	169309	157816	203982	183	183	183	1
XP_750605.1	Aspergillus fumigatus Af293	nuclear movement protein NudC	12	0.189005	0.263952	1.11736	0.468683	0.626866	0.947325	0.00844429	0.316533	0.764113	0.263765	0.784025	0.901261	253701	217072	248726	251751	295396	256949	313916	327356	298773	303888	263635	325803	187	187	187	1
XP_756056.1	Aspergillus fumigatus Af293	C2H2 transcription factor (AmdX), putative	7	0.363139	0.475118	0.67712	0.950232	0.970684	1.01712	0.00862119	0.321538	1.48449	0.980359	0.996657	0.988265	31371.6	34520.8	38299.8	37439.6	30860	11145.1	21443.4	22646.6	26108.5	32197.4	28592.5	14491.6	20	20	20	1
XP_753490.1	Aspergillus fumigatus Af293	actin cytoskeleton organization protein (Cro1), putative	14	0.0325923	0.0713805	0.887268	0.0491261	0.13004	0.88694	0.00868842	0.322261	1.1538	0.0413974	0.70386	1.15423	156196	151836	153125	128302	135904	145475	126814	133128	140040	118900	111465	124466	141	141	141	1
XP_755392.2	Aspergillus fumigatus Af293	disulfide isomerase, putative	37	0.0493281	0.0934166	1.09469	0.0127069	0.0731261	1.21102	0.00897256	0.328731	1.0764	0.632268	0.937386	0.973003	261841	263818	251085	291945	291187	267644	241372	240086	239986	311963	267912	295524	445	445	445	1
XP_747511.1	Aspergillus fumigatus Af293	AhpC/TSA family thioredoxin peroxidase, putative	19	0.0121961	0.0462417	0.936217	0.427031	0.583646	0.972936	0.00902705	0.326553	0.930932	0.0240521	0.7232	0.895797	1004862	1056819	1030744	970678	956931	967010	1109697	1113079	1098435	1112377	1109180	1012754	628	628	628	1
XP_754831.1	Aspergillus fumigatus Af293	proteasome regulatory particle subunit Rpt1, putative	35	0.0104562	0.0433918	0.894377	0.0838971	0.172232	1.09623	0.00905037	0.323116	1.11355	0.0803967	0.68686	0.908512	359470	343862	357753	317645	326724	304838	311565	312359	329075	351192	325824	368699	520	520	520	1
XP_755360.1	Aspergillus fumigatus Af293	TOR pathway phosphatidylinositol 3-kinase TorA, putative	47	0.125897	0.192177	1.05916	0.00888242	0.0621176	0.882863	0.00905634	0.321042	0.931533	0.0388622	0.71277	1.11755	101413	102975	99915.9	107521	102211	112811	108954	106574	111166	97447.9	99202.8	91886.2	294	294	294	1
XP_750667.1	Aspergillus fumigatus Af293	proteasome regulatory particle subunit (RpnG), putative	26	0.0222446	0.0585432	1.1392	0.0163348	0.0790115	1.10036	0.00917052	0.32066	0.929537	0.395431	0.852502	0.962347	276323	267428	273405	297236	332284	302430	298717	293896	286535	309496	327164	330993	409	409	409	1
XP_753957.1	Aspergillus fumigatus Af293	cell cycle control protein (Cwf2), putative	15	0.0109668	0.0441822	0.910571	0.0104726	0.0668645	0.892561	0.00922467	0.319918	0.905103	0.0324296	0.717205	0.923365	73178.4	75406.3	72786	66989.8	65247.6	69375.6	80217.2	84511.5	79902.7	70619.8	72741.3	74981.1	131	131	131	1
XP_748155.1	Aspergillus fumigatus Af293	DNA replication factor C subunit Rfc3, putative	12	0.428464	0.557433	0.973906	0.130917	0.234583	1.12101	0.0092422	0.317859	1.22796	0.276006	0.782536	1.06682	160678	177439	170035	161986	165995	166540	133428	133330	147167	163715	161268	139696	157	157	157	1
XP_754788.1	Aspergillus fumigatus Af293	cohesin complex subunit (Psm1), putative	49	0.0108552	0.0442375	0.951982	0.0110822	0.0681363	0.92614	0.0092769	0.31696	0.941712	0.109549	0.709481	0.967988	155702	155890	154961	149056	144954	150192	161219	168268	166021	149476	155211	154213	498	498	498	1
XP_753896.1	Aspergillus fumigatus Af293	NADH-ubiquinone oxidoreductase B12 subunit, putative	2	0.82919	0.901425	1.02686	0.00615286	0.0586963	2.07397	0.00929819	0.313822	1.62193	0.210944	0.752231	0.803047	421670	362168	324356	394906	425702	319035	245284	197260	239936	440162	397497	591926	44	44	44	0.9989
XP_755320.1	Aspergillus fumigatus Af293	eukaryotic translation initiation factor 3 subunit EifCg, putative	13	0.477857	0.612127	1.03001	0.00241941	0.0580146	1.16917	0.00942367	0.313765	1.06481	0.203771	0.757513	0.938071	516727	515890	528607	555568	556795	497786	478313	495337	492634	552488	569919	592424	338	338	338	1
XP_749446.1	Aspergillus fumigatus Af293	alkaline phosphatase Pho8	24	0.00372755	0.0356441	1.12732	0.403209	0.558212	1.03964	0.00943981	0.310718	0.924002	0.96628	0.994168	1.00193	337249	339872	349661	388204	374001	395475	377662	372095	361522	406151	394398	356382	410	410	410	1
XP_753335.1	Aspergillus fumigatus Af293	kinesin family protein	49	0.0971463	0.156086	0.909252	0.108719	0.201265	0.932439	0.00957701	0.311308	1.12411	0.138417	0.727581	1.09615	140351	144294	152324	123924	140828	132874	128742	128410	131369	119578	114628	128448	324	324	324	1
XP_749918.1	Aspergillus fumigatus Af293	branched-chain amino acid aminotransferase	14	0.0167891	0.0506084	1.24131	0.00499531	0.0534531	0.844371	0.0096511	0.309067	0.77192	0.0112376	0.726815	1.1348	322525	374086	324569	428736	400955	435707	454032	450203	416514	371787	363262	379498	211	211	211	1
XP_750139.1	Aspergillus fumigatus Af293	alpha/beta hydrolase, putative	16	0.690363	0.807998	0.990875	0.169925	0.284743	0.912523	0.00965389	0.306151	0.943925	0.689892	0.936801	1.02497	121596	125635	121868	123872	117454	124490	132037	129342	129619	119711	130219	107902	125	125	125	1
XP_753545.1	Aspergillus fumigatus Af293	acyltransferase, putative	21	0.00010342	0.0173333	0.662111	0.000191004	0.0582857	0.707159	0.00966091	0.30329	1.09859	0.422174	0.868563	1.02861	141563	143016	135984	96866.8	90154	91507.2	128878	129617	124299	86339.6	91267.5	93182.7	194	194	194	1
XP_753313.2	Aspergillus fumigatus Af293	SNF7 family protein	11	0.00208136	0.0374807	0.793905	0.544107	0.699059	1.0651	0.00978196	0.303741	1.18572	0.257862	0.78028	0.883813	95401.3	87755.9	90383	74738.2	69478.9	72916.8	76970.2	73229.2	80531.3	71311.5	79080.7	97255.1	91	91	91	1
XP_751735.1	Aspergillus fumigatus Af293	N-acetyltransferase family protein, putative	14	0.007492	0.0406411	2.14056	0.0424977	0.123827	2.03698	0.00978902	0.300954	0.88854	0.821635	0.975807	0.933721	43682.9	43662.9	42004.7	98760.3	69050.4	115227	50470.8	46782.5	48369	61838.7	137852	113235	71	71	71	1
XP_755163.1	Aspergillus fumigatus Af293	conserved hypothetical protein	12	0.431089	0.561072	1.07472	0.207429	0.329999	0.870795	0.00981569	0.299345	0.759512	0.582629	0.926678	0.937372	29310.5	31887.2	26532.4	30368.9	28647.5	35381.9	36411.6	39264.6	39588.8	28812.8	39092.1	33180.7	48	48	48	1
XP_752331.1	Aspergillus fumigatus Af293	actin-interacting protein (Bud6/Aip3), putative	24	0.0121071	0.0461053	0.923528	0.115277	0.211669	1.14684	0.00985444	0.299532	1.11971	0.193673	0.758755	0.901678	117286	111396	117834	107268	106153	106495	105946	100067	103440	117347	105877	133139	137	137	137	1
XP_754739.1	Aspergillus fumigatus Af293	NADH-ubiquinone oxidoreductase subunit	8	0.0676453	0.115973	1.07699	0.259568	0.388719	0.932561	0.00997786	0.299571	0.947298	0.207596	0.756039	1.09401	786036	767012	785102	803334	885982	830787	817198	836903	814159	851994	724409	731683	212	212	212	1
XP_755197.2	Aspergillus fumigatus Af293	DUF788 domain protein	4	0.0217307	0.0583099	1.15166	0.143634	0.250688	1.03556	0.00998267	0.29692	0.922422	0.553365	0.915062	1.02583	102106	97502.2	96706.9	107354	113158	121057	106319	106838	107994	114223	107112	111344	64	64	64	1
XP_750008.1	Aspergillus fumigatus Af293	lipase, putative	5	0.142651	0.211164	0.862232	0.0692994	0.15318	0.501375	0.0102907	0.306316	0.872625	0.234322	0.767538	1.50068	46085.6	49207.6	45855	46107.9	35204.7	41065.8	51914.8	54427.2	55385.3	41028.4	15899.2	30236.4	35	35	35	1
XP_747445.1	Aspergillus fumigatus Af293	fructosyl amino acid oxidase, putative	5	0.00119677	0.035	0.720051	0.754416	0.852705	1.01783	0.0104666	0.307339	1.243	0.0481097	0.675865	0.879347	215623	191767	202582	145479	141359	152068	154535	162507	173684	154014	176677	169020	29	29	29	1
XP_751173.1	Aspergillus fumigatus Af293	trehalose-phosphate synthase/phosphatase complex subunit Tps1, putative	22	0.127483	0.193394	1.08877	0.0802543	0.166622	0.770525	0.0104774	0.30469	0.821284	0.255556	0.781781	1.16049	166721	172611	189369	195042	183121	196927	219860	205621	217607	174446	193130	133579	266	266	336	1
XP_750785.1	Aspergillus fumigatus Af293	proteasome component Pre9, putative	13	0.00562682	0.0398883	1.20397	0.293369	0.429027	0.971629	0.0104814	0.302085	0.863252	0.0627206	0.673381	1.06968	554892	591721	614594	695274	693499	730398	665944	695418	677358	665439	680540	635392	270	270	270	1
XP_749397.1	Aspergillus fumigatus Af293	Ku family DNA helicase, putative	12	0.0785489	0.130686	1.1055	0.27104	0.402956	0.93073	0.0107633	0.310441	0.796363	0.322788	0.808493	0.945902	54632.8	52192.2	59545	59589.5	60750.6	63366.6	66739.3	74149.5	67933	60895.7	70806.4	62861.2	94	94	94	1
XP_755740.1	Aspergillus fumigatus Af293	conserved hypothetical protein	10	0.0778126	0.129123	1.15594	0.00718443	0.0592129	0.797229	0.0107823	0.307832	0.80153	0.0607673	0.672966	1.16218	76758.3	78959.3	89244.3	86879.3	97582.9	98543.6	104646	101560	98832.8	85692	83143	74702.2	73	73	73	1
XP_753488.1	Aspergillus fumigatus Af293	pre-mRNA splicing factor RNA helicase (Prp43), putative	37	0.140952	0.208227	1.03667	0.000823988	0.0386667	1.08273	0.0109136	0.309967	1.0782	0.0779283	0.68672	1.03233	306116	313170	297222	313166	324663	312217	284926	285725	279233	304447	306108	309618	597	570	597	1
XP_754917.1	Aspergillus fumigatus Af293	RRM domain protein	9	0.0187135	0.054198	1.17986	0.861706	0.923316	0.98686	0.0109611	0.310215	0.866919	0.666019	0.941024	1.03646	164272	182840	176947	194424	214359	209450	201607	202272	200033	217275	209040	172612	104	104	104	1
XP_751901.2	Aspergillus fumigatus Af293	conserved hypothetical protein	8	0.887002	0.938972	0.990512	0.186018	0.308496	0.484293	0.0109797	0.307672	0.751093	0.398422	0.853499	1.53619	79067	89158.9	96555.4	83318.8	90601.7	87626.7	123499	114398	113704	79879	98990.8	23075.6	52	52	52	1
XP_755244.1	Aspergillus fumigatus Af293	polyadenylation factor subunit CstF64, putative	2	0.51529	0.650073	1.31772	0.668858	0.795706	0.767269	0.0111193	0.306764	0.492986	0.817269	0.976055	0.846664	17763.5	27584	27602.6	17535.8	60269.3	29281	43617.6	53603.3	48281.2	11818.1	65029.2	66346.7	13	13	13	0.9991
XP_751486.1	Aspergillus fumigatus Af293	RNA methyltransferase, TrmH family family	5	0.0327736	0.0716141	2.51507	0.219067	0.343384	0.504467	0.011361	0.31729	0.336259	0.354025	0.832628	1.67645	17727.3	12012.1	9275.22	20434.8	40229	38223.2	41806.6	27317.6	45486.3	9871.71	43926	15379.8	11	11	11	1
XP_751141.1	Aspergillus fumigatus Af293	leucyl-tRNA synthetase	76	0.0951073	0.153914	1.08624	0.00201485	0.0558291	1.16542	0.0113805	0.316672	1.07228	0.98942	0.997742	0.999426	742419	735826	722169	775270	857380	760708	690494	695776	666057	823545	779880	788636	1967	1967	1967	1
XP_001481470.1	Aspergillus fumigatus Af293	sodium bile acid symporter family protein	3	0.891467	0.942158	1.08824	0.596306	0.739442	0.806393	0.0114245	0.31819	0.390207	0.385234	0.852312	0.526592	21012.8	15919.9	19128.4	11498.8	11216.7	63938.8	46468.4	34294.2	67583.4	46609.9	58908.6	20568.4	13	13	13	0.9999
XP_750611.1	Aspergillus fumigatus Af293	GPI transamidase component PIG-S, putative	7	0.00785258	0.0407664	1.30872	0.421035	0.577239	0.80776	0.0115145	0.317417	0.808301	0.323465	0.807506	1.3096	43110.7	50202.2	46902.7	59462.4	65083	58794.6	56180.8	59935.8	57083.8	59951.8	58277.1	28995.7	42	42	42	1
XP_751700.1	Aspergillus fumigatus Af293	proteasome activator subunit 4, putative	47	0.00018482	0.0107059	1.19191	0.168404	0.282806	1.05358	0.011811	0.323625	0.924498	0.192279	0.757266	1.04588	227953	234898	224760	272308	272787	274344	246270	243638	253846	266452	270808	246858	407	407	407	1
XP_754275.1	Aspergillus fumigatus Af293	sulfate transporter, putative	7	0.814378	0.891398	1.01734	0.583045	0.729249	0.978565	0.0119079	0.322667	0.853467	0.156332	0.747661	0.887282	59089.8	57147.9	53183	57072.8	51785.5	63979.7	64179.7	68411.4	65795.8	62983.1	62432.3	68843.2	37	37	37	1
XP_755435.1	Aspergillus fumigatus Af293	triosephosphate isomerase	10	0.272552	0.363895	1.07008	0.00962671	0.0651534	1.3413	0.0120831	0.324615	1.23119	0.803391	0.974654	0.982235	153834	138954	163378	170068	160900	156384	124358	121629	123717	155127	155350	187380	153	153	153	1
XP_748867.1	Aspergillus fumigatus Af293	BNR/Asp-box repeat domain protein	14	0.0451766	0.0868373	0.869467	0.00218615	0.0548031	0.820597	0.0122681	0.327725	0.904151	0.449181	0.881923	0.957997	144044	142255	134297	121987	112917	131316	157656	153399	153948	132245	128787	120794	155	155	155	1
XP_748726.1	Aspergillus fumigatus Af293	SNF7 family protein Fti1/Did2, putative	6	0.0130724	0.0476177	0.818275	0.00295931	0.057325	0.617133	0.0123738	0.326455	0.867625	0.162743	0.757273	1.15041	79370.1	81089.8	83655.9	71646.8	61427.8	67027.9	94966.4	97857.2	88707.6	52752.8	55479.7	66203.2	81	81	81	1
XP_747672.1	Aspergillus fumigatus Af293	cell cycle control protein Cdc123	10	0.0112539	0.0455185	0.847445	0.294713	0.429771	0.940064	0.0126391	0.32788	1.15524	0.492328	0.89991	1.04142	106743	99289.1	98542.9	90506.9	85085.7	82539.8	86836.5	91608.8	85155.7	89915.5	81660.9	76643.6	74	74	74	1
XP_754638.1	Aspergillus fumigatus Af293	Golgi transport complex component Cog5, putaitve	9	0.852134	0.91656	0.986144	0.218648	0.343359	0.883464	0.0127092	0.326925	0.837814	0.547998	0.914511	0.935188	124059	125814	140548	117965	143310	124444	153733	152821	158776	115918	146483	151483	56	56	56	1
XP_747863.1	Aspergillus fumigatus Af293	peptidyl prolyl cis-trans isomerase (CypC), putative	8	0.00042065	0.027931	0.883417	0.893926	0.940186	0.995634	0.0127203	0.324504	1.05868	0.106063	0.711677	0.939359	89582.4	87833.9	91363.4	79248.2	79300.6	78865.7	85059.4	85328.7	83472.2	85850.1	79434.9	87681.3	111	111	111	1
XP_753319.2	Aspergillus fumigatus Af293	peptidyl-prolyl cis-trans isomerase, putative	21	0.128819	0.194658	0.918217	0.30547	0.443073	1.07614	0.0128513	0.326353	1.19241	0.803198	0.974649	1.01743	79711.8	75709.3	72331.3	70459.3	73492.3	65261.1	62276.9	67505.1	61242.5	63693.2	66084.5	76230.6	115	115	115	1
XP_752703.1	Aspergillus fumigatus Af293	Arp2/3 complex subunit (Arp2), putative	22	0.206916	0.287079	1.0499	0.207975	0.330842	0.947313	0.0128819	0.325547	0.884713	0.641404	0.936607	0.980522	353684	379208	384609	400215	396626	376082	427498	424195	410777	384324	426571	386276	460	445	460	1
XP_749743.1	Aspergillus fumigatus Af293	uracil DNA N-glycosylase Ung1, putative	12	0.00588582	0.0403636	0.883602	0.00935651	0.0642366	0.817848	0.0130087	0.324203	0.90918	0.700614	0.937542	0.982277	89209.9	85493.5	86269.6	79760.4	74818.8	76063.6	96284	92444.6	98359.9	72752.1	83059.6	79256.8	132	132	132	1
XP_746677.1	Aspergillus fumigatus Af293	xylitol dehydrogenase	6	0.616773	0.745998	1.03767	0.0112975	0.0677314	0.739474	0.0131063	0.325755	0.77567	0.324624	0.809347	1.08846	83654.1	101245	93609.8	95946.8	89672.9	102958	118287	115389	124466	79587.2	99251.2	86963.9	77	77	77	1
XP_748901.1	Aspergillus fumigatus Af293	fatty-acyl coenzyme A oxidase (Pox1), putative	20	0.000797236	0.0322947	0.768155	0.107994	0.200292	0.713089	0.0131782	0.325143	0.925724	0.987328	0.996681	0.997209	96590.2	94249.1	92953.2	74860.9	68900.7	74360.4	103053	99364.2	104169	53056.9	79851.3	91293	152	152	152	1
XP_754777.1	Aspergillus fumigatus Af293	conserved hypothetical protein	5	0.00278634	0.0381802	0.809715	0.0571216	0.13982	0.923918	0.0134037	0.325447	1.14893	0.824704	0.977576	1.00691	299886	295158	282130	247342	225724	237454	250954	244693	268142	238244	229398	237614	102	102	102	1
XP_747804.1	Aspergillus fumigatus Af293	MFS transporter, putative	4	0.00652888	0.0385714	4.08727	0.628998	0.764725	0.855903	0.0137591	0.330676	0.317566	0.231559	0.768025	1.5165	11138.6	15774.3	26915.9	68503.8	59066.4	79805.3	54625.8	61101.7	44242.1	62613.8	57371.9	25774.6	29	29	29	1
XP_754931.1	Aspergillus fumigatus Af293	conserved hypothetical protein	3	0.0681644	0.117145	1.69727	0.00523089	0.0536285	2.89672	0.013992	0.335049	2.29095	0.228884	0.76274	1.34233	38511.3	40888.2	26990.8	48362.9	82912.3	51823.5	13644.2	12628.5	20514.5	49040.3	50431.4	34739.5	23	23	23	1
XP_746362.1	Aspergillus fumigatus Af293	RNA polymerase II mediator complex component SRB4, putative	9	0.058059	0.105711	1.12748	0.0350908	0.113294	0.817528	0.0141191	0.335806	0.821419	0.119188	0.714271	1.13285	31797	33152.2	29201.2	34292.9	34560.9	37225.4	40202.4	37980.1	36374.5	27877.8	33682.5	32318.5	47	47	47	1
XP_001481514.1	Aspergillus fumigatus Af293	conserved hypothetical protein	5	0.0165263	0.0501994	0.681575	0.0457419	0.127418	0.337806	0.0144148	0.337076	0.833743	0.251733	0.778276	1.6822	36276.6	36780.6	37999	22353.4	23574.5	30463	40890.6	46853.2	45662.3	7378.2	26631.4	17162.4	24	24	24	1
XP_753040.1	Aspergillus fumigatus Af293	pseudouridine synthase TruD/Pus7, putative	25	0.0163093	0.0499822	1.08829	0.42893	0.58576	1.04099	0.0144439	0.335616	0.877519	0.092901	0.699588	0.917387	82885.1	78384.2	78707.8	86874	88819.1	85419.8	93729.6	93322	86515.3	90599.1	92200.7	102197	211	211	211	1
XP_749629.1	Aspergillus fumigatus Af293	tyrosine decarboxylase, putative	20	0.07807	0.129572	1.12673	0.0969954	0.186809	1.03512	0.0147265	0.336272	0.931772	0.79249	0.970704	1.01424	227144	216508	225781	239354	239645	276896	242842	236000	239497	248394	241778	253484	250	250	250	1
XP_755640.1	Aspergillus fumigatus Af293	Nudix/MutT family protein	9	0.0337856	0.0718374	0.843655	0.00431731	0.0563871	0.816035	0.0148941	0.335054	0.970065	0.96583	0.99453	1.0029	103322	105219	102789	95102.1	79289.6	88986.4	107312	107089	106522	82270.9	92810.4	87119.5	82	82	82	1
XP_752608.1	Aspergillus fumigatus Af293	G2/M phase checkpoint control protein Sum2, putative	19	0.0190917	0.0549227	0.869105	0.569352	0.718171	1.06694	0.0149239	0.332805	1.24136	0.914775	0.989835	1.01118	259336	257302	249517	217920	237449	211230	224011	187508	207216	196686	204374	262988	249	249	249	1
XP_753417.1	Aspergillus fumigatus Af293	ribonucleotide reductase small subunit RnrA, putative	21	0.0730591	0.123891	1.09655	0.56473	0.714185	0.983034	0.015087	0.334107	0.95702	0.225567	0.760058	1.06753	357904	356089	361980	403287	413128	365086	379474	377156	367742	376814	350085	379010	233	233	233	1
XP_754991.1	Aspergillus fumigatus Af293	cytoskeleton assembly control protein Sla2, putative	68	0.141139	0.208385	0.969751	0.151518	0.261147	1.04694	0.0151986	0.334437	1.06208	0.578722	0.922824	0.983773	603048	601857	624457	578847	592334	602835	576849	564456	581007	622551	573456	608092	1124	1124	1124	1
XP_751822.1	Aspergillus fumigatus Af293	SNARE complex subunit (Tlg2), putative	2	0.707199	0.821544	1.12907	0.0528167	0.133743	0.578403	0.0153818	0.336368	0.583652	0.718141	0.949438	1.13932	13784.8	19641.5	16306.2	28495.7	20519.1	10868.2	24633.6	27392.9	32907.9	14917.7	12485.2	23070.6	3	3	3	0.9991
XP_747815.1	Aspergillus fumigatus Af293	2-dehydropantoate 2-reductase, putative	13	0.270402	0.360853	0.950977	0.0298998	0.103404	1.19495	0.0155862	0.339425	1.29085	0.280844	0.787788	1.0273	92501.6	101134	89650.6	90660.8	91484.8	86964.1	66950	72706.7	80103.3	88639.3	88589.4	84725.6	88	88	88	1
XP_752876.1	Aspergillus fumigatus Af293	mtDNA inheritance protein Dml1, putative	5	0.65953	0.783928	1.02673	0.0307074	0.105721	0.84492	0.0156494	0.338545	0.842346	0.728628	0.954896	1.0236	69304.6	64197.8	63233.2	61205.6	69748.8	71328.9	74221.6	82618.3	76762.4	71026	64562.2	61916.6	23	23	23	1
XP_752649.1	Aspergillus fumigatus Af293	Exocyst complex component Sec5, putative	10	0.507873	0.643053	0.922956	0.126632	0.229077	0.275352	0.0156712	0.337161	0.71654	0.263555	0.785139	2.40178	191240	209441	210934	210402	152159	207482	322013	288207	247450	142667	20708.4	162278	19	19	19	1
XP_747294.1	Aspergillus fumigatus Af293	COP9 signalosome subunit 1 (CsnA), putative	9	0.0915581	0.14896	0.94804	0.00687728	0.0578441	0.841887	0.0159984	0.345667	0.892961	0.863619	0.985073	1.00555	94948.6	97914.5	101765	91188.5	92612.3	95456.1	106440	113988	109514	93860.5	87834.9	96171.8	92	92	92	1
XP_750809.1	Aspergillus fumigatus Af293	SIR2 family histone deacetylase, putative	2	0.34354	0.447052	0.684386	0.313055	0.451383	1.42569	0.0160467	0.343465	2.26966	0.84869	0.985074	1.08952	28155.9	28220	38024.2	30317.6	10824	29512.6	10491.5	19246.8	12797	30525.8	12835.7	19111.3	12	12	12	0.9991
XP_753263.1	Aspergillus fumigatus Af293	CCCH finger DNA binding protein, putative	14	0.00941901	0.041652	0.823989	0.00170493	0.0515094	0.881393	0.016111	0.343747	1.15618	0.0404154	0.71033	1.08088	376042	408056	362319	328458	306776	308680	324197	332538	333671	283446	297646	291948	217	217	217	1
XP_747287.1	Aspergillus fumigatus Af293	casein kinase, putative	18	0.00844463	0.0403214	1.15156	0.287998	0.421292	0.955468	0.0163211	0.346843	0.89657	0.114837	0.705503	1.08057	388747	421410	396570	450075	476131	462953	459870	441788	443701	427416	455677	403719	555	555	555	1
XP_754384.2	Aspergillus fumigatus Af293	vacuolar ATP synthase 16 kDa proteolipid subunit, putative	1	0.00371038	0.0357714	1.69351	0.227217	0.352973	0.419383	0.0164434	0.347525	0.566715	0.239143	0.777946	2.28845	93695.6	117238	122550	193396	178154	189768	157777	199044	235514	151627	145738	24688.3	29	29	29	1
XP_748034.1	Aspergillus fumigatus Af293	small nucleolar ribonucleoprotein complex subunit (Pwp2), putative	31	0.0408908	0.0814478	1.0806	0.00507745	0.0537097	0.861461	0.016497	0.346907	0.876235	0.00510019	0.532333	1.09913	129660	139625	138851	150059	145520	145254	150042	162241	153492	133986	136621	130492	315	315	315	1
XP_755770.1	Aspergillus fumigatus Af293	conserved hypothetical protein	12	0.0257657	0.0637066	1.06247	0.898877	0.943036	1.00537	0.0166825	0.348123	0.909883	0.338227	0.817471	0.961565	205477	215368	209075	225281	218262	225681	223661	229612	239170	231800	218629	246287	222	222	222	1
XP_752868.1	Aspergillus fumigatus Af293	ATP-dependent RNA helicase (Drs1), putative	24	0.167667	0.240197	0.957032	0.396528	0.551445	1.0361	0.0167386	0.348294	1.10007	0.700635	0.937241	1.01612	201014	210158	196912	200597	192310	189016	187596	186123	178962	179548	202272	191370	278	278	278	1
XP_749685.1	Aspergillus fumigatus Af293	exonuclease, putative	6	0.0441446	0.0855283	0.813894	0.000824419	0.0380328	0.602801	0.0167912	0.347829	0.775381	0.509944	0.905519	1.04691	32784.5	37904.5	37454.9	26320.4	30508.7	31250.4	42531.1	49269.9	47646.9	28393	26213.3	29384	21	21	21	1
XP_746600.1	Aspergillus fumigatus Af293	conserved hypothetical protein	12	0.101556	0.161667	1.11252	0.586997	0.73271	0.915054	0.016901	0.346352	0.788414	0.787407	0.968548	0.958554	65002.5	61240.8	58269.6	63907.1	68281.2	73196.6	85137.6	71271	78004	56803.9	69065.2	92438.8	105	105	105	1
XP_753830.1	Aspergillus fumigatus Af293	importin 13, putative	9	0.00306694	0.0377647	0.829843	0.356595	0.506694	0.561865	0.0169551	0.345663	1.12209	0.413202	0.864854	1.65726	138105	126180	131334	111968	107077	109088	116069	115763	120562	124200	105658	21896.2	38	38	38	1
XP_751760.1	Aspergillus fumigatus Af293	histone acetylase complex subunit MRG15-2	18	0.78229	0.874135	0.990808	0.00616571	0.0584797	0.868071	0.0170256	0.344072	0.879866	0.874071	0.986624	1.00427	85026.9	87763.6	93053.8	89407.5	89012.9	84868.4	99011.8	104521	98506.6	85306.4	86191.4	90693.4	166	166	166	1
XP_755764.1	Aspergillus fumigatus Af293	phosphoribulokinase/uridine kinase family protein	10	0.283424	0.376923	0.9246	0.909427	0.947659	0.990502	0.017128	0.346119	1.12188	0.658195	0.938388	1.04724	99993.6	100283	95471.4	93191.9	100024	81180.8	92110.6	86772.3	84828.5	97257.7	75467.8	89766.2	82	82	82	1
XP_754159.1	Aspergillus fumigatus Af293	hypothetical protein AFUA_3G14665	2	0.00555714	0.0397847	0.284602	0.84824	0.914295	1.05145	0.0172326	0.345254	3.08475	0.365871	0.838958	0.834961	39726.1	40394.8	79750.8	14997.9	14404.7	13655.8	14551.6	13057.6	22945.9	24294.8	13866.5	15044.2	5	5	5	0.9991
XP_746560.1	Aspergillus fumigatus Af293	dienelactone hydrolase	6	0.547473	0.682506	0.854848	0.0180919	0.0805632	0.420266	0.0172416	0.343224	0.729447	0.282178	0.789015	1.48374	27538.4	21370.6	25433.1	13381.6	26556.2	26311.6	35305.4	34191.8	31945.6	9489.44	20446.5	14753.2	11	11	11	1
XP_753832.1	Aspergillus fumigatus Af293	Exocyst complex component Sec8, putative	26	0.18335	0.25743	1.05769	0.269665	0.401513	0.957836	0.0173734	0.343766	0.913491	0.848523	0.985492	1.00872	54459.4	53460.6	57484.4	55503.1	60991.1	58498.2	59409.9	60626.9	60956.7	54147.3	59295.9	60092	144	144	144	1
XP_755590.1	Aspergillus fumigatus Af293	translocation protein Sec62, putative	9	0.0737405	0.124676	1.04508	0.0267624	0.0985899	1.3211	0.0174032	0.341767	1.2445	0.813018	0.976347	0.984485	154813	152609	151054	161326	163397	154534	133141	110416	125948	155879	150164	182386	148	148	148	1
XP_755803.2	Aspergillus fumigatus Af293	arsenite resistance protein Ars2, putative	29	0.0330187	0.0717934	0.978328	0.0447889	0.127495	0.912542	0.0174878	0.34104	0.929686	0.907132	0.990978	0.996708	165022	164402	163236	159067	160495	162434	175691	182788	171616	167222	153352	163316	326	326	326	1
XP_755010.1	Aspergillus fumigatus Af293	conserved hypothetical protein	26	0.838361	0.908942	1.00797	0.531861	0.687834	1.01892	0.017507	0.33908	0.972042	0.433791	0.878036	0.961595	112836	111052	111700	121208	108517	108978	113868	115327	116048	115344	113101	123574	257	257	257	1
XP_746790.1	Aspergillus fumigatus Af293	isoleucyl-tRNA synthetase, putative	14	2.31359e-05	0.0813333	0.673291	0.0571702	0.139557	0.865121	0.0175816	0.338309	1.19671	0.107472	0.700069	0.931353	65809.1	67185	64444.8	45395.1	43457.6	44084	51767.6	53551.5	59972.3	44709.8	49710.1	48435.6	75	75	75	1
XP_749173.1	Aspergillus fumigatus Af293	conserved hypothetical protein	5	0.150692	0.220504	0.733125	0.313411	0.451657	1.46214	0.0178189	0.340864	1.60609	0.572495	0.920715	0.805302	28681.2	29710.5	25380.8	14587.4	24259.6	24081.5	14333.2	21148.7	17221.6	18606.7	47149	18600.7	8	8	8	1
XP_747696.1	Aspergillus fumigatus Af293	ATP synthase D chain, mitochondrial, putative	15	0.281421	0.374732	1.04707	0.00918418	0.0636143	1.28957	0.0178842	0.339525	1.06867	0.0876993	0.69979	0.867715	1730170	1667080	1642536	1746850	1869638	1665239	1553005	1592980	1569072	2145611	1821575	2129908	569	569	569	1
XP_748050.1	Aspergillus fumigatus Af293	lysophospholipase, putative	8	0.325257	0.426867	1.1018	0.00874599	0.061431	0.658088	0.0179696	0.338494	0.760515	0.0743603	0.687432	1.27329	45625.1	54974.7	46188.2	57216.9	47433.7	57094.6	68589.9	60358.9	63617	37839.4	49212.6	40309.4	67	67	67	1
XP_749624.1	Aspergillus fumigatus Af293	conserved hypothetical protein	14	0.131664	0.197568	0.936897	0.00203978	0.0553	0.800053	0.0183395	0.34248	0.900194	0.234036	0.769454	1.05417	235245	247515	244565	239789	215478	226651	263722	281701	262768	206358	220881	219322	174	174	174	1
XP_750698.1	Aspergillus fumigatus Af293	conserved hypothetical protein	9	0.00354382	0.0366592	0.83523	0.188075	0.310444	1.11271	0.0184333	0.342467	1.23671	0.198651	0.756703	0.928306	197191	182204	194059	158121	164776	155924	152283	142863	169436	162696	165949	188092	67	67	67	1
XP_747285.1	Aspergillus fumigatus Af293	ribosome biogenesis protein, putative	14	0.258589	0.347008	1.03384	0.810677	0.890037	0.983862	0.0184927	0.342431	0.926039	0.698036	0.937216	0.973076	132720	125796	129363	138552	133212	129304	138399	143119	137308	129495	128590	155548	146	146	146	1
XP_753555.1	Aspergillus fumigatus Af293	DUF221 domain protein, putative	34	0.0446769	0.0864242	1.04604	0.227669	0.353401	0.924955	0.0186568	0.343011	0.843628	0.257785	0.780665	0.954062	509254	508509	487519	531226	520722	522369	621428	546685	618932	512722	568608	570739	543	543	543	1
XP_750553.1	Aspergillus fumigatus Af293	endoplasmic reticulum DnaJ domain protein Erj5, putative	7	0.664967	0.788413	1.02	0.0010514	0.04176	1.12856	0.0189496	0.350164	1.17505	0.0142033	0.728239	1.06202	94940.2	109086	102900	102419	106972	103226	89186.8	86221.5	85418.6	99028	98139.4	97149	70	70	70	1
XP_750529.1	Aspergillus fumigatus Af293	NAD(+)-isocitrate dehydrogenase subunit I	21	0.0645094	0.113123	1.10277	0.00552461	0.0557683	1.16836	0.0189749	0.348261	1.05788	0.975182	0.995277	0.998488	1044243	1065944	1047896	1152203	1244265	1091096	1009309	1007519	968885	1206224	1176079	1107674	776	776	776	1
XP_746671.1	Aspergillus fumigatus Af293	WD repeat protein	17	0.566021	0.700707	1.02517	0.00416308	0.0581818	0.821695	0.0189988	0.346378	0.874751	0.0840486	0.704909	1.09136	484754	528349	531840	549298	502114	532106	581356	609966	573881	480457	462153	508465	132	132	132	1
XP_755311.1	Aspergillus fumigatus Af293	conserved hypothetical protein	2	0.807675	0.887381	0.971326	0.0597835	0.142064	0.490862	0.0190075	0.344516	0.471975	0.77131	0.965984	0.933952	16822.3	18513.7	18076.7	17684	14179	20576.3	49626.1	41752.1	25843.6	12654.5	21517.3	23258.7	22	22	22	0.9991
XP_747339.1	Aspergillus fumigatus Af293	DNA repair/transcription protein, putative	35	0.0187703	0.0546351	1.07517	0.0349143	0.113769	0.894236	0.0190374	0.344257	0.9333	0.0330076	0.726203	1.12214	212813	223335	217977	230168	240296	232816	233261	238485	229086	217551	214402	195375	331	331	331	1
XP_755997.1	Aspergillus fumigatus Af293	DNA polymerase delta catalytic subunit Cdc2, putative	34	0.558267	0.694251	0.975687	0.0799638	0.166511	0.75871	0.0191845	0.345298	0.917913	0.246896	0.771261	1.18042	98414.6	103543	97909.9	104183	92959.4	95685.6	106114	111267	109260	84567	99949.5	66657.1	189	189	189	1
XP_752274.1	Aspergillus fumigatus Af293	conserved hypothetical protein	10	0.237985	0.322642	1.11559	0.499006	0.655637	0.915264	0.01919	0.343471	0.833256	0.913871	0.990573	1.01563	39874.2	41783.8	35799.9	45493.2	38412.1	47388.7	45671.8	48055.9	46973.3	34436.9	44437.6	51654.9	42	42	42	1
XP_750459.1	Aspergillus fumigatus Af293	dienelactone hydrolase family protein	9	0.00858659	0.0407699	1.28955	0.621706	0.760361	0.964914	0.0194115	0.344905	0.775028	0.537839	0.910848	1.03578	108308	126497	122240	146256	154817	158612	168718	145408	146640	135726	159172	149602	99	99	99	1
XP_754772.1	Aspergillus fumigatus Af293	cystathionine beta-synthase (beta-thionase), putative	13	0.0744524	0.124677	0.924579	0.929031	0.95887	0.997094	0.0194562	0.345277	1.08165	0.943766	0.993278	1.00299	318455	308914	299936	297873	271081	288813	291036	279732	286393	298321	270446	286481	191	191	191	1
XP_746683.1	Aspergillus fumigatus Af293	mitochondrial molecular chaperone (Atp12), putative	10	0.982355	0.992817	0.999403	0.853953	0.919381	0.989895	0.0194685	0.344771	1.10209	0.107124	0.704155	1.11268	213684	228989	219669	214454	221183	226199	205255	194305	201337	217149	195541	183431	122	122	122	1
XP_751800.2	Aspergillus fumigatus Af293	conserved hypothetical protein	4	0.0970288	0.156252	1.13007	0.031308	0.106732	0.635546	0.0197317	0.347399	0.734339	0.101825	0.712148	1.30574	32555	30097	32098.3	33669	34121	39508.4	50261.8	40164.3	39341.9	30837.1	30469.4	21698.8	33	33	33	1
XP_754663.1	Aspergillus fumigatus Af293	DNA polymerase epsilon, catalytic subunit A/POL2, putative	15	0.393045	0.51312	0.469328	0.0558482	0.137888	0.734582	0.0197629	0.345608	0.875027	0.506847	0.904883	0.55906	52436.5	52942.6	48723.1	4957.88	54186.6	52049.4	61361.8	56554.6	58175.9	42119.7	52963.8	35872.8	30	30	30	1
XP_751714.1	Aspergillus fumigatus Af293	ADAM family of metalloprotease ADM-B	3	0.0316905	0.0700063	1.34041	0.134901	0.23927	0.879648	0.0198109	0.34519	0.753875	0.178265	0.767218	1.14876	28671.5	35700.8	32943.9	42515.9	39174.2	48760.5	40827.9	46331.3	41607.5	38316.5	41169	33960.5	20	20	20	1
XP_755451.2	Aspergillus fumigatus Af293	developmental regulator FlbA	15	0.0646326	0.112944	0.940087	0.287878	0.421268	1.05563	0.019931	0.346939	1.09635	0.616549	0.935403	0.976356	67948.7	68686.5	65031.9	64061.6	60984.7	64545.3	59912.5	63505.5	60534.1	61526.1	62828.1	70088.3	90	90	90	1
XP_749212.1	Aspergillus fumigatus Af293	oxidoreductase, 2OG-Fe(II) oxygenase family, putative	2	0.571436	0.70765	0.920611	0.222469	0.347866	1.24499	0.0201484	0.350518	1.97571	0.0130976	0.732525	1.46094	21639.5	26460.4	33821.6	24285	23434.2	26550.9	10868.6	13622.9	16960	19889.5	15756	15463.1	5	5	5	0.9991
XP_751847.2	Aspergillus fumigatus Af293	conserved hypothetical protein	7	0.00405332	0.0358362	0.839031	0.233621	0.359679	0.87755	0.0203469	0.350949	1.20521	0.166647	0.75565	1.1523	102257	100513	99663.1	80737.3	89107.3	84100.1	78094.3	81372.9	92080.3	76667.9	81905.9	62972.8	30	30	30	1
XP_751779.1	Aspergillus fumigatus Af293	sphinganine-1-phosphate aldolase BST1, putative	26	0.0330283	0.0717193	0.924846	0.306932	0.443368	0.962794	0.0204864	0.351698	1.07035	0.486264	0.89617	1.02816	294168	294009	278483	258900	268945	273632	269595	270804	269039	277134	251461	251548	357	357	357	1
XP_754995.1	Aspergillus fumigatus Af293	proteasome regulatory particle subunit (RpnC), putative	30	0.0222425	0.0586165	1.1347	0.0047516	0.0547064	1.1048	0.0205138	0.35052	0.958068	0.687438	0.937172	0.983991	1758029	1719169	1705858	1886909	2096315	1904223	1811867	1777939	1819936	1939889	1987647	2050387	468	468	468	1
XP_749597.1	Aspergillus fumigatus Af293	PAB-dependent poly(A)-specific ribonuclease subunit (Pan2), putative	14	0.245176	0.331869	0.932636	0.0265453	0.0988348	1.19762	0.0206932	0.351801	1.20494	0.299994	0.792357	0.938331	345741	335217	323800	293398	342864	302629	304743	262551	268111	336070	317700	345123	56	56	56	1
XP_755266.1	Aspergillus fumigatus Af293	amino-acid N-acetyltransferase subunit Mak10, putative	9	0.230492	0.312923	1.09457	0.0016867	0.0504854	0.719086	0.0209947	0.354733	0.810518	0.0163565	0.69285	1.23375	36970.2	30579	34969.2	35215.8	39035.5	37713.8	42209.3	42512.7	41375.7	31112.8	31962.1	27761.3	53	53	53	1
XP_752064.1	Aspergillus fumigatus Af293	zinc metalloprotease, putative	35	0.00100331	0.0326207	1.12258	0.327592	0.472031	0.963222	0.0210295	0.352985	0.905244	0.0909125	0.697863	1.05501	156657	160733	162918	177244	180630	181266	169121	177752	183958	175400	173141	162734	468	468	468	1
XP_752144.1	Aspergillus fumigatus Af293	GPI-anchored cell wall organization protein Ecm33	11	0.843026	0.911257	1.00875	0.011704	0.0693583	1.37173	0.0210619	0.351255	1.26348	0.240207	0.77566	0.929149	912910	1013902	1016926	948851	1017252	1001014	762805	714924	855728	1172251	1026513	1000981	761	761	761	1
XP_754844.1	Aspergillus fumigatus Af293	transcription elongation factor S-II	15	0.00042843	0.0274576	0.73987	0.00768318	0.0614875	0.836702	0.0212778	0.351473	1.12324	0.846701	0.984147	0.993248	315246	318633	293757	234081	226026	225877	277933	265316	282361	217826	231195	242178	168	168	168	1
XP_754680.1	Aspergillus fumigatus Af293	AMMECR1 family protein	5	0.00206038	0.0381124	1.2634	0.497121	0.654269	0.741719	0.0213404	0.350155	0.796266	0.485535	0.896748	1.35631	43887.8	42381.4	46321.2	54551.4	58103.6	54816.3	55990.5	60851.8	50088.4	18636.8	63454.5	58885.5	53	53	53	1
XP_752593.1	Aspergillus fumigatus Af293	mitochondrial hypoxia responsive domain protein	14	0.373636	0.48846	1.05525	0.0591132	0.141825	0.91555	0.0214568	0.351459	0.871083	0.941529	0.992893	1.004	397957	410414	382924	389617	409264	460886	477751	428882	461799	417668	409025	425068	391	391	391	1
XP_746495.1	Aspergillus fumigatus Af293	conserved hypothetical protein	7	0.804399	0.885617	0.988553	0.0194839	0.0833171	1.14381	0.0214678	0.349769	1.15927	0.963304	0.994442	1.00192	148849	134766	150399	139085	150428	139303	127118	119748	127214	149830	135336	142910	46	46	46	1
XP_750311.1	Aspergillus fumigatus Af293	phenylalanyl-tRNA synthetase, beta subunit	33	0.0209859	0.0574836	1.08604	0.0036342	0.0610968	1.12135	0.0215619	0.34978	1.09412	0.0211553	0.705804	1.05966	519038	529058	496135	560534	569309	546874	473079	481448	456694	517127	529056	536087	640	640	640	1
XP_750182.1	Aspergillus fumigatus Af293	SH3 and Ded_cyto domain protein, putative	29	0.165043	0.237077	0.967286	0.710339	0.825677	1.00969	0.0215969	0.348114	1.0724	0.333477	0.81371	1.02736	392263	368273	378260	362442	367374	371412	357780	351831	351982	374483	348497	349461	205	205	205	1
XP_749334.1	Aspergillus fumigatus Af293	signal recognition particle 14kD protein, putative	4	0.0574201	0.104826	1.2064	0.0438444	0.125252	0.68472	0.0217259	0.348986	0.800514	0.0639084	0.664848	1.41042	179593	211460	218420	248122	227555	257949	255292	253621	249736	172289	217462	138548	43	43	43	1
XP_746721.2	Aspergillus fumigatus Af293	Ran-binding protein (RanBP10), putative	10	0.441402	0.570737	0.97913	0.0341028	0.111005	0.820481	0.0217831	0.347717	0.820174	0.617236	0.935653	0.978764	38833	36848.6	36492.3	35487.8	37217.8	37112	47434.9	48428.3	41201	34790.6	39176.6	38354.9	50	50	50	1
XP_755318.1	Aspergillus fumigatus Af293	oxidoreductase, 2-nitropropane dioxygenase family, putative	17	0.0663223	0.115131	0.764587	0.0067466	0.0588414	0.582941	0.0219402	0.347005	0.799859	0.743598	0.95735	1.0491	202448	242704	233091	184496	143676	193118	267036	291435	287584	136273	192928	168634	260	260	260	1
XP_754410.1	Aspergillus fumigatus Af293	dynactin Arp1 p25 subunit	2	0.0904202	0.147485	0.649807	0.554979	0.706184	1.22736	0.0220221	0.347832	2.75066	0.204529	0.758305	1.45629	40256.5	36452.3	36931.4	24761.9	34141.9	17588.9	12324.5	9091.6	23240	14401.2	14435.9	23159.1	18	18	18	0.9999
XP_754814.1	Aspergillus fumigatus Af293	peroxisome biosynthesis protein (PAS8/Peroxin-6), putative	23	0.0064676	0.03877	0.919569	0.743073	0.844853	0.983782	0.0220316	0.346214	1.07179	0.969815	0.994754	1.00183	58080.9	59136.3	56496.1	52350	54007.6	53368.8	55414.2	53784.2	52881.7	51230.8	50451.2	58059.8	79	79	79	1
XP_752356.1	Aspergillus fumigatus Af293	conserved hypothetical protein	5	0.0417347	0.0824465	0.802447	0.0178524	0.0797613	0.604418	0.0221367	0.345815	0.70996	0.637403	0.937001	0.942568	99266.3	104640	120704	83962.9	81441.3	94740.9	131248	166972	159875	76535.1	91311.6	110699	90	90	90	1
XP_751754.1	Aspergillus fumigatus Af293	AAA family ATPase Pontin, putative	23	0.971869	0.985989	1.00094	0.114555	0.210567	0.923308	0.0223707	0.348479	0.954303	0.493325	0.900036	1.03454	1296027	1314919	1296851	1368394	1262649	1282726	1351467	1398020	1345939	1208901	1218324	1359032	389	389	389	1
XP_751645.1	Aspergillus fumigatus Af293	C6 finger domain protein, putative	9	0.485908	0.621209	0.978447	0.0015868	0.0505306	0.832926	0.022566	0.35244	0.892537	0.0745363	0.684343	1.04847	74481.2	73111	69525.7	73419	68654.5	70357.3	84785	80338.4	78172.4	67701.9	67198.6	67632.3	105	105	105	1
XP_753825.1	Aspergillus fumigatus Af293	origin recognition complex subunit 2, putative	3	0.511773	0.647352	0.774477	0.095002	0.184879	1.26626	0.0226852	0.351744	1.47205	0.782552	0.969539	0.900341	22358.3	31273.4	30241	29853.5	10873.6	30259.9	18375.1	18917.2	19070.2	19738.8	28676.8	23777.3	13	13	13	1
XP_751219.2	Aspergillus fumigatus Af293	multispanning membrane protein, putative	7	0.602068	0.732496	0.956155	0.00103737	0.0429041	1.41905	0.0229043	0.353673	1.1493	0.0336173	0.719654	0.774395	39843.6	37966.3	38064.2	32245.8	42211.9	36978.6	31979.5	35987	32957.8	49474	46049.9	47573.6	41	41	41	1
XP_751097.1	Aspergillus fumigatus Af293	conserved hypothetical protein	7	0.0553275	0.102262	0.576314	0.148482	0.257621	0.436817	0.0230698	0.35448	0.601722	0.660188	0.938511	0.793881	25908.1	32719.6	22442.4	11042.3	19893.7	16577.4	37098.6	48789.6	48243.6	10969.3	13933.7	47618.7	40	40	40	1
XP_749753.1	Aspergillus fumigatus Af293	deoxycytidylate deaminase, putative	4	0.0268123	0.0631682	0.869703	0.0260192	0.0996878	0.506808	0.0231435	0.353441	0.856637	0.121317	0.70968	1.47002	50839.1	51475.7	56286.6	43666	47053.9	47160.6	61246.7	58845.5	65015.6	28151.5	45559.8	23782.7	27	27	27	1
XP_756012.1	Aspergillus fumigatus Af293	nonsense-mediated mRNA decay protein 3	20	0.906146	0.951056	0.996587	0.0934583	0.183143	0.772253	0.0231571	0.351857	0.888286	0.305737	0.796775	1.14633	193082	205850	190335	199208	190910	196888	230896	218404	214029	164250	211975	142771	258	258	258	1
XP_752152.1	Aspergillus fumigatus Af293	dihydrofolate synthetase Fol3	11	0.512825	0.647689	1.03156	0.020737	0.0864026	0.672094	0.0232186	0.350286	0.875508	0.0542125	0.671108	1.34377	59029.9	65898.3	60972.2	60828.7	63760.1	67128.2	69409.8	73253.8	69510	49781	55509.8	38828.8	86	86	86	1
XP_749474.1	Aspergillus fumigatus Af293	histone deacetylase RpdA/Rpd3	21	0.390062	0.509806	0.953967	0.000176652	0.068	0.801437	0.0234671	0.350471	0.868472	0.373645	0.845457	1.03376	759863	771883	852748	717509	752636	804074	907751	942522	892446	728089	736254	733224	188	188	188	1
XP_748741.1	Aspergillus fumigatus Af293	lipase/serine esterase, putative	4	0.458457	0.590434	0.575312	0.416348	0.571764	1.76537	0.0234673	0.34892	3.12066	0.985386	0.996315	1.01698	53798.7	64383.2	59814.8	63948.1	69496	8877.22	11919.7	34573	16542.9	53830.4	61480.6	11333.3	21	21	21	0.9992
XP_751641.1	Aspergillus fumigatus Af293	serine/threonine protein kinase, putative	28	0.0577986	0.105643	0.959284	0.395695	0.550314	1.01302	0.0236606	0.350749	1.05254	0.837105	0.978528	0.996703	276122	285019	272267	270721	263697	264962	264950	265405	261325	273225	267410	261466	337	337	337	1
XP_753341.1	Aspergillus fumigatus Af293	chorismate mutase	15	0.0370956	0.0770214	1.16639	0.00686296	0.0580408	1.38101	0.0238392	0.350702	1.18684	0.972126	0.99461	1.0024	235512	225447	217103	251911	287821	252283	203655	192203	176153	264083	241847	284354	147	147	147	1
XP_752999.1	Aspergillus fumigatus Af293	ribosome assembly protein Noc2, putative	25	0.00492352	0.0386867	1.07317	0.28664	0.420164	0.951176	0.0242231	0.35876	0.94446	0.182585	0.762351	1.0656	164412	164636	159154	176315	172742	174823	173293	168409	175218	151968	167255	173132	323	323	323	1
XP_754476.1	Aspergillus fumigatus Af293	arginase, putative	8	0.04261	0.0832249	1.54683	0.0623229	0.145217	0.593815	0.0242301	0.3572	0.582036	0.105543	0.713225	1.51615	37891.6	59741.1	54993.7	76143.1	71414.6	84731.1	84185.4	96376.3	77816.8	56192.3	67062.6	35081.3	82	82	82	1
XP_754526.1	Aspergillus fumigatus Af293	bZIP transcription factor (MeaB), putative	4	7.07883e-05	0.0162667	0.695967	0.0209616	0.0865752	0.686496	0.0243698	0.35716	1.13843	0.21486	0.752064	1.15413	34369.4	33430.4	32281.4	23557.1	22701	23381.1	28159.9	28602.5	31211.5	19804.8	23947	17149.1	32	32	32	1
XP_753714.1	Aspergillus fumigatus Af293	transcription factor (Snd1/p100), putative	62	0.347494	0.452349	0.982973	0.00707517	0.0587459	0.908788	0.024372	0.355621	0.946854	0.285302	0.790531	1.02415	545655	555753	571467	551418	538447	554361	580468	590022	596067	553615	523915	528276	1252	1252	1252	1
XP_755369.1	Aspergillus fumigatus Af293	kynureninase	10	0.00139614	0.0378611	1.20188	0.874333	0.92945	1.01146	0.0246719	0.359708	0.820865	0.603183	0.93521	0.975402	85132.4	82674.4	86284.3	103863	103725	97867.9	103972	112968	93478.8	102814	112451	98268.6	75	75	75	1
XP_755071.1	Aspergillus fumigatus Af293	gamma-glutamyl phosphate reductase	24	5.95202e-05	0.0244	0.876243	0.306772	0.443297	0.955183	0.0247825	0.360479	1.08405	0.872841	0.987744	0.994462	315119	308252	312508	271383	273769	274884	277508	286678	299516	286488	257895	281062	400	400	400	1
XP_747912.2	Aspergillus fumigatus Af293	peroxisomal membrane protein Pmp47, putative	4	0.718859	0.827117	1.04211	0.0745994	0.160046	0.780637	0.0247979	0.359949	0.779239	0.777287	0.967919	1.04024	50677.3	63433.6	54469.2	62471.2	49349.4	64277.9	72154.8	68450.3	74925.9	46035.7	63752.7	59982.8	27	27	27	1
XP_752666.1	Aspergillus fumigatus Af293	SCF ubiquitin ligase complex subunit CulA, putative	35	0.0835256	0.139136	1.04132	0.133375	0.23753	0.954387	0.0248799	0.358424	0.929595	0.558352	0.916295	1.01427	208695	204581	197850	209556	215497	211217	213177	223020	221182	206716	217625	203201	475	475	475	1
XP_749433.1	Aspergillus fumigatus Af293	protein-ER retention receptor, putative	2	0.02189	0.057815	0.539472	0.438043	0.594499	0.84554	0.0250024	0.358937	2.16193	0.0748478	0.684906	1.37935	34645.6	51222.3	49574.3	24009.4	19686.7	29222.4	15753.1	18993.8	29097.9	18319	19008.1	15114.9	11	11	11	0.9991
XP_747232.1	Aspergillus fumigatus Af293	pentatricopeptide repeat protein	6	0.69078	0.808165	0.864828	0.201323	0.323762	0.814463	0.0251762	0.360857	0.682646	0.407776	0.860457	0.72486	18975.6	17580.3	24187.3	33260.5	12544.8	12508.5	26752.7	32050.4	29581.5	29400.8	24317.2	19167.3	7	7	7	1
XP_753799.1	Aspergillus fumigatus Af293	polyubiquitin binding protein (Doa1/Ufd3), putative	22	0.781892	0.873882	1.00957	0.00399708	0.058806	1.21644	0.0253555	0.360854	1.14482	0.106552	0.707781	0.95013	193884	175856	179763	186835	187388	180139	166239	152491	161141	196467	186711	200447	244	244	244	1
XP_752073.1	Aspergillus fumigatus Af293	snRNP assembly factor, putative	16	0.0284943	0.0655	1.0566	0.676039	0.802862	0.989863	0.025367	0.359683	0.943828	0.757644	0.961583	1.00746	73591.6	77599.5	76213.5	79738.2	79577.7	80908.7	81156.5	79552.2	80179.9	76625.3	79277.4	82650.2	158	158	158	1
XP_746666.1	Aspergillus fumigatus Af293	AAA family ATPase, putative	25	0.0143874	0.0483578	1.08765	0.301878	0.437675	0.954938	0.025427	0.358954	0.93008	0.210079	0.755736	1.05933	158172	165213	155363	175419	170487	174670	172922	173576	168121	171821	168165	152082	186	186	186	1
XP_747661.1	Aspergillus fumigatus Af293	killer toxin sensitivity protein (Iki1), putative	5	0.000648422	0.0345	1.26084	0.0286797	0.101111	1.11195	0.0254379	0.357802	0.898155	0.507338	0.903814	1.01842	63080.3	63040.5	58783.1	78434.6	76956.3	77622.9	70840.9	68908.3	66093.1	72969.3	76553.5	79407.4	39	39	39	1
XP_747196.1	Aspergillus fumigatus Af293	peptidyl-prolyl cis-trans isomerase, putative	5	0.211292	0.292105	0.911741	0.0157564	0.0783366	0.711995	0.0254571	0.35684	0.827394	0.553299	0.91531	1.05951	146202	174055	153710	149124	134147	148193	196951	186841	187660	114942	147850	146668	54	54	54	1
XP_746592.1	Aspergillus fumigatus Af293	conserved hypothetical protein	11	0.0343999	0.0731705	1.17093	0.00424644	0.0571776	0.883892	0.0255899	0.358393	0.834898	0.00296706	0.591	1.10603	141640	164815	164127	182523	182251	184913	192946	183668	185777	166450	169539	161105	141	141	141	1
XP_755226.1	Aspergillus fumigatus Af293	GDSL Lipase/Acylhydrolase family protein	4	0.0722679	0.122697	1.14889	0.18958	0.311411	0.918957	0.0257153	0.358661	0.853485	0.365447	0.839006	1.06704	36357.2	35942.5	37996.9	38326.5	46304.4	42429.1	44929.4	44937	39557.2	42232.9	38152.8	38465.2	44	44	44	1
XP_747039.1	Aspergillus fumigatus Af293	bifunctional catalase-peroxidase Cat2	42	0.0194489	0.0548055	2.50487	0.0759963	0.160936	2.40489	0.0257389	0.357528	0.838522	0.772997	0.966189	0.873382	1317534	1168470	1124398	3268519	1921765	4331143	1471807	1386041	1439228	1660018	5411230	4546027	686	686	686	1
XP_754184.1	Aspergillus fumigatus Af293	chitin synthase ChsG	34	0.0662279	0.115198	1.09455	0.131891	0.235164	0.971048	0.0258592	0.358769	0.930548	0.224586	0.75903	1.0489	391499	414670	397274	440991	414641	462514	438356	433230	421464	415664	427041	412873	547	437	547	1
XP_747280.1	Aspergillus fumigatus Af293	pre-mRNA splicing helicase, putative	92	0.0614064	0.110121	1.0272	0.219332	0.343499	0.960639	0.0259494	0.358113	0.953696	0.494952	0.899814	1.01977	398961	389738	400376	402759	407294	411318	424345	409260	413259	395218	384302	418901	949	949	949	1
XP_749473.1	Aspergillus fumigatus Af293	alkaline serine protease	11	0.222086	0.304457	1.08274	0.00326613	0.0568655	1.4569	0.0259536	0.356675	1.18502	0.121273	0.710534	0.880685	4759809	4664768	4134667	5164174	4899708	4605298	3723569	3977839	3724529	5599070	5014311	6076307	578	578	578	1
XP_755506.1	Aspergillus fumigatus Af293	mitochondrial serine protease Pim1, putative	46	0.00247034	0.0396219	0.826402	0.00202685	0.0562373	0.861231	0.0260579	0.356448	1.05705	0.671888	0.939094	1.0143	173328	177675	174568	144000	152108	138521	167854	168362	161062	139456	141939	146889	533	533	533	1
XP_756019.1	Aspergillus fumigatus Af293	curved DNA-binding protein (42 kDa protein)	32	0.0066446	0.0392911	1.17881	0.0199907	0.0844618	1.12606	0.0262671	0.358135	0.937404	0.667612	0.93972	0.981309	1609773	1619265	1590921	1844271	2016079	1826944	1661663	1768882	1712810	1909141	1856719	2027946	852	852	852	1
XP_752150.1	Aspergillus fumigatus Af293	ubiquinone biosynthesis protein, putative	6	0.315464	0.414207	1.10561	0.0399792	0.120554	0.69938	0.026418	0.359206	0.83746	0.112965	0.708285	1.3239	74137.9	78093.2	83861.2	91710.1	74248.5	96365.2	100424	88299	93224.5	75930.6	70916.8	52516.7	57	57	57	1
XP_746667.1	Aspergillus fumigatus Af293	Rab	11	0.104225	0.164487	1.10466	0.104488	0.194642	0.790671	0.0266411	0.361866	0.832474	0.239776	0.776269	1.16306	285604	307172	267880	318298	301495	330109	350602	362061	320906	274811	325319	225226	180	180	238	1
XP_752050.1	Aspergillus fumigatus Af293	UPF0041 domain protein	6	0.0650255	0.11323	1.20592	0.0377665	0.117981	0.813443	0.0267061	0.361465	0.76615	0.114541	0.707122	1.13581	377395	446286	353353	463815	454463	495144	545429	499765	485482	427863	449230	370583	64	64	64	1
XP_752401.1	Aspergillus fumigatus Af293	phosphoglycerate kinase PgkA, putative	47	0.00684878	0.0394144	0.900942	0.328498	0.472153	0.930131	0.0267881	0.361678	1.07593	0.558539	0.916123	1.04217	3458937	3607119	3674388	3169704	3278056	3226589	3346034	3382774	3251860	3501584	2825818	2993364	2609	2609	2609	1
XP_746360.1	Aspergillus fumigatus Af293	IMP-specific 5'-nucleotidase (Isn1), putative	13	0.795774	0.879312	0.993494	0.0638225	0.146609	0.937794	0.0268457	0.362469	0.948118	0.892955	0.988455	1.00443	79505.6	80727.9	79778.6	80995.2	75906.4	81670.6	82243.4	84356.6	86596.4	78792.5	82138.2	76561.8	100	100	100	1
XP_747545.1	Aspergillus fumigatus Af293	purine nucleoside phosphorylase I, inosine and guanosine-specific	21	0.0207209	0.0577553	1.11772	0.836841	0.908592	1.00696	0.0269601	0.36249	0.914707	0.685185	0.936937	1.01532	289753	303167	281710	337592	326159	313827	324975	321641	309346	307895	338224	317025	444	444	444	1
XP_753827.1	Aspergillus fumigatus Af293	pyridoxine biosynthesis protein	21	0.0453461	0.0868891	1.20239	0.00558702	0.056	1.61757	0.0269789	0.361705	1.27476	0.552238	0.914989	0.947573	1204474	1315705	1327476	1450903	1723620	1462303	1138644	968490	920893	1480638	1591094	1824462	862	862	862	1
XP_752566.1	Aspergillus fumigatus Af293	nuclear and cytoplasmic polyadenylated RNA-binding protein pub1	8	0.578707	0.713543	0.969685	0.0200325	0.0846644	1.26664	0.0270189	0.3621	1.28639	0.672575	0.938235	0.984802	516305	490930	439379	458472	483812	457793	378369	337408	409804	464893	456617	500849	153	153	153	1
XP_753587.1	Aspergillus fumigatus Af293	cofilin	11	0.783764	0.874153	0.985645	0.109841	0.203568	0.805935	0.0271059	0.361169	0.862676	0.645484	0.936863	1.05504	1815288	2063341	2006806	1822628	2018973	1955941	2342768	2278812	2193014	1935828	2114592	1497220	506	506	506	1
XP_749094.1	Aspergillus fumigatus Af293	L-galactose dehydrogenase (L-GalDH), putative	8	0.0283526	0.0656641	1.16748	0.231001	0.356949	0.737835	0.0272882	0.362146	0.778639	0.371795	0.842037	1.23205	44804.4	49319.5	48338.7	59479.3	53241.8	53674.2	67539.7	62439	53655	51588.4	58601.3	30063.8	47	47	47	1
XP_752304.1	Aspergillus fumigatus Af293	pentatricopeptide repeat protein	4	0.0228365	0.0603111	0.615118	0.00619837	0.0591618	0.495448	0.0273748	0.361756	1.17221	0.110841	0.707985	1.45534	76903.1	78210.9	73336	52023.1	54965.5	35902	62719.1	70686.7	61769.7	36249.6	36748.5	25001.5	30	30	30	1
XP_747366.1	Aspergillus fumigatus Af293	hypothetical protein AFUA_8G05650	12	0.0101093	0.043064	0.465852	0.0194493	0.0834625	0.524105	0.0276368	0.364152	1.22271	0.73687	0.955337	1.08681	197711	196981	167074	115494	67188.3	84772.9	154021	157552	146686	57904.8	86099.7	102785	113	113	113	1
XP_753697.1	Aspergillus fumigatus Af293	clock controled protein (Ccg-8), putative	4	0.00460405	0.036775	0.454337	0.144503	0.251911	0.768763	0.0276829	0.363242	1.48466	0.466423	0.886734	0.877428	31815.9	36566.8	30264.3	19143.3	13083.9	13183.8	24535.5	24365.2	17997.8	15205.7	15409.3	20862.8	9	9	9	1
XP_754517.1	Aspergillus fumigatus Af293	CFIA complex component Rna14, putative	31	0.0120724	0.0458445	1.09643	0.0504003	0.130235	0.905244	0.0277238	0.361872	0.907419	0.0353702	0.722494	1.09906	140821	145491	142317	156626	151626	161833	149346	159968	163347	142089	148698	137015	255	255	255	1
XP_755214.1	Aspergillus fumigatus Af293	amino acid permease (Dip5), putative	5	0.133517	0.199351	1.15214	0.00011361	0.11	1.29971	0.0281347	0.364015	1.20583	0.283245	0.788135	1.06892	83251.6	92197.9	76616.9	102870	100644	86870.1	71283.2	69530.5	67673.1	88856.1	90471.1	91604.4	58	58	58	1
XP_754203.1	Aspergillus fumigatus Af293	BAR adaptor protein RVS167, putative	22	0.962977	0.981297	0.998747	0.00811538	0.0610778	0.890638	0.0281968	0.363476	0.898872	0.60498	0.93367	1.00798	419618	449645	419645	419851	432774	434127	458072	492751	483005	429108	417603	429820	355	355	355	1
XP_750753.1	Aspergillus fumigatus Af293	metallopeptidase Mip1	23	1.92495e-05	0.244	0.627285	0.00257847	0.0596028	0.60619	0.0282024	0.362119	0.943817	0.769558	0.964885	0.976661	348730	346294	355833	223054	211960	224343	372192	380373	361029	194967	248057	235413	129	129	129	1
XP_751704.1	Aspergillus fumigatus Af293	carbonic anhydrase Nce103, putative	11	0.310256	0.409239	1.0983	0.0112414	0.067759	0.764126	0.0282386	0.361502	0.774007	0.182237	0.764078	1.11251	264396	321652	259879	335798	296938	293654	386903	356163	345880	271478	304793	256999	222	222	222	1
XP_752456.1	Aspergillus fumigatus Af293	tubulin beta, putative	30	0.0117144	0.046087	1.06667	0.346738	0.494178	0.947766	0.0284521	0.363052	0.934219	0.358428	0.835429	1.05142	3352273	3485014	3486751	3646663	3720085	3644234	3797044	3646658	3608096	3752331	3555078	3188395	2021	1400	2021	1
XP_755366.1	Aspergillus fumigatus Af293	U2-type spliceosomal complex subunit CWC25	9	0.104246	0.16445	0.733253	0.639348	0.772605	0.789166	0.0284831	0.361712	1.45368	0.563391	0.917352	1.35068	71168.9	84222.6	66717.4	62300	41601.9	60830.1	42699.8	53636.1	56842.2	65059.6	61610	15962.3	43	43	43	1
XP_750170.1	Aspergillus fumigatus Af293	50S ribosomal protein YmL27	5	0.697701	0.813561	0.961255	0.0435107	0.125497	1.24278	0.0285023	0.360382	1.19673	0.513604	0.905914	0.925637	235733	222278	224845	216205	258331	187359	207732	174424	189714	219486	228500	263088	82	82	82	1
XP_748025.1	Aspergillus fumigatus Af293	translation initiation factor eIF4E3, putative	13	0.173286	0.247572	0.956953	0.459888	0.618649	0.971529	0.028535	0.359355	1.06766	0.273456	0.783273	1.05164	238836	238328	246827	236821	220073	236239	219795	232243	226158	227069	206141	226160	133	133	133	1
XP_749614.2	Aspergillus fumigatus Af293	RanGTP-binding protein	3	0.290485	0.384732	1.22017	0.0437305	0.125068	0.446834	0.0285495	0.358467	0.626041	0.137782	0.729185	1.70953	15312.2	16336.2	18378	27152.6	16042.2	19172.1	33352.9	21326.5	26340.7	7998.88	18591.3	11240.3	8	8	8	0.9996
XP_750918.1	Aspergillus fumigatus Af293	thioredoxin, putative	9	0.357849	0.467387	0.94288	0.0274922	0.0992901	1.51903	0.028656	0.357455	1.3909	0.190012	0.754905	0.863345	342210	314872	319989	297062	338907	287080	219648	206732	282188	349649	313202	410129	145	145	145	1
XP_752663.1	Aspergillus fumigatus Af293	G protein complex alpha subunit	6	0.376706	0.491666	0.933894	0.0193469	0.0834266	2.26295	0.0286921	0.356826	1.99988	0.10374	0.708861	0.825328	64027.7	67689.8	59114.6	54799.7	66174.4	57545.3	44228.8	21932.5	33020.2	62258.5	76634.2	77799.7	31	31	44	1
XP_747259.1	Aspergillus fumigatus Af293	cytoskeleton assembly control protein Sla1, putative	31	0.00124285	0.0344776	0.855739	0.0169184	0.0796098	0.914848	0.0287049	0.355538	1.0709	0.940321	0.993182	1.0017	206765	213558	210573	183399	182537	174050	190708	195524	203041	178811	176006	184196	284	284	284	1
XP_752066.2	Aspergillus fumigatus Af293	CaaX prenyl protease Ste24	19	0.000403614	0.0289286	1.20162	0.556177	0.706542	1.02516	0.028813	0.355784	0.940651	0.0623423	0.67558	1.10257	286160	289926	275402	342412	336450	344112	299494	297974	307618	321856	320245	286950	360	360	360	1
XP_750730.1	Aspergillus fumigatus Af293	conserved hypothetical protein	5	0.000510695	0.0344242	0.609239	0.642152	0.774918	0.896704	0.0288664	0.354781	1.88679	0.0983447	0.710456	1.28192	55733.8	57520.2	59536	36217.2	32129.2	37090.8	23221.4	27883.7	43884.5	30780.6	30107.4	22107.9	23	23	23	1
XP_752761.1	Aspergillus fumigatus Af293	TFIIH complex helicase Rad3, putative	7	0.540257	0.67531	1.04054	0.184196	0.306735	0.833105	0.028972	0.356529	0.809264	0.928272	0.991074	1.01076	41713.2	42066.6	47491.1	46587.8	41866.9	48134.3	59171.7	50440.6	52681.6	51257.1	48384.7	36659.8	68	68	68	1
XP_754028.1	Aspergillus fumigatus Af293	UV excision repair protein (RadW), putative	9	0.0742928	0.124567	0.904568	0.619709	0.759825	1.04623	0.0295094	0.358406	1.14802	0.933707	0.992565	0.992571	747382	728460	670608	658932	667802	614120	611118	602756	655095	560809	668057	737613	127	127	127	1
XP_747899.1	Aspergillus fumigatus Af293	nucleolar RNAse III, putative	5	0.440847	0.57037	1.23621	0.00113104	0.04215	0.284768	0.0295329	0.357688	0.466216	0.0162689	0.706051	2.02389	19701.2	31151.8	16735	20403.2	26415	36001.8	50333.5	56225.2	35813.7	15051.4	12878.6	12074.5	13	13	13	1
XP_750033.1	Aspergillus fumigatus Af293	endoplasmic reticulum and nuclear membrane proteinc Npl4, putative	19	0.149306	0.218629	0.971634	0.00336362	0.05675	0.851905	0.0295755	0.356707	0.928894	0.0487634	0.66369	1.05944	145646	151777	150410	142331	147420	145357	154902	163086	164214	138692	132119	139971	173	173	173	1
XP_749925.1	Aspergillus fumigatus Af293	peptidyl-prolyl cis-trans isomerase, putative	18	0.015584	0.0493905	1.02567	0.422812	0.578794	1.06893	0.0295761	0.355451	1.03054	0.887355	0.986479	0.988829	201300	203746	200020	207705	205573	207306	193083	196086	197978	235619	182443	212973	93	93	93	1
XP_753343.1	Aspergillus fumigatus Af293	conserved hypothetical protein	5	0.0364855	0.0763192	1.25957	0.733374	0.841299	1.04678	0.0295926	0.354204	0.73639	0.343602	0.822059	0.886083	33944.1	36645	38936.7	51216.2	41147.8	45925.7	46261.5	58432.4	44868.4	44544.7	50833.9	61438.1	49	49	49	1
XP_749594.1	Aspergillus fumigatus Af293	Hsp70 chaperone BiP/Kar2, putative	47	0.000970431	0.032973	1.10216	0.007952	0.0612	1.19746	0.0297629	0.354098	1.03811	0.28176	0.78908	0.955498	1813774	1838044	1833239	2007356	2055223	1983413	1726845	1790388	1766949	2245870	2099627	1989209	1302	1302	1431	1
XP_753783.1	Aspergillus fumigatus Af293	septin AspA, putative	22	0.0220646	0.0584949	0.94667	0.992982	0.998119	0.999596	0.0298716	0.354467	1.07551	0.670517	0.939133	1.01856	708458	701690	734848	675880	670864	683514	671099	680390	643091	718245	630306	647836	826	826	826	1
XP_753937.1	Aspergillus fumigatus Af293	conserved hypothetical protein	4	0.0505175	0.0953316	0.346577	0.0860113	0.175348	0.299221	0.0300466	0.3555	1.16718	0.668758	0.939215	1.3519	105310	94697.2	110259	25775.5	23253.4	76371	87315.9	90765	87255.9	75084.7	18860.6	13082.1	25	25	25	1
XP_749080.1	Aspergillus fumigatus Af293	amino acid permease (Gap1), putative	24	0.022159	0.0584786	0.886172	0.245146	0.373911	1.09448	0.0301124	0.35427	1.1767	0.431432	0.874561	0.952739	1990653	1997249	1834044	1738887	1759943	1658140	1701154	1731026	1519822	2002341	1719949	1703787	719	719	719	1
XP_731504.1	Aspergillus fumigatus Af293	NADP-dependent alcohol dehydrogenase	8	0.0192251	0.0548469	0.687537	0.0001063	0.1375	0.477738	0.0301562	0.353752	0.71261	0.549591	0.914435	1.02555	50516.4	36898.4	39072.6	29081.1	27574	29518.3	55027.7	58773.9	62228.6	26303.3	28404.1	29372.2	29	29	29	1
XP_754939.1	Aspergillus fumigatus Af293	pyridoxamine phosphate oxidase, putative	8	0.0129838	0.0477808	0.710549	0.0997253	0.190246	0.621	0.0302539	0.353649	0.861746	0.95465	0.993913	0.986011	109823	116099	126857	94757.8	81592.1	75050.9	136055	140335	132379	59999	78597.9	128356	98	98	98	1
XP_755426.1	Aspergillus fumigatus Af293	Golgi membrane protein (Rer1), putative	7	0.389602	0.508773	0.927416	0.00599773	0.0578657	1.16859	0.030291	0.352438	1.12287	0.20227	0.759067	0.891126	344053	365706	383239	374416	349202	294184	331043	327794	313875	373870	366160	397047	113	113	113	1
XP_746888.1	Aspergillus fumigatus Af293	C6 transcription factor, putative	2	0.181677	0.255788	4.60297	0.0636297	0.146347	0.13996	0.0303049	0.351235	0.119667	0.256634	0.780998	3.93557	81902.3	13908.1	10494.1	217699	26329.5	203387	193658	210456	171156	11066	124094	13927.1	7	7	7	0.9714
XP_753760.1	Aspergillus fumigatus Af293	conserved hypothetical protein	3	0.0237528	0.0612652	2.83667	0.126963	0.229711	0.442732	0.030437	0.352803	0.326611	0.128889	0.713962	2.09266	19293.9	13448.1	35707.7	53985.7	57439.5	68199	73149.7	81714.8	44487.3	32156.4	51338.2	13978.6	23	23	23	1
XP_755395.1	Aspergillus fumigatus Af293	serine/threonine protein kinase (YPK1), putative	22	0.00414014	0.035906	0.953779	0.0528726	0.133749	0.934776	0.030855	0.353573	1.03902	0.0660236	0.666883	1.06014	350047	357772	353257	340677	335627	335712	343677	343857	333752	332659	313779	308641	308	308	308	1
XP_752800.1	Aspergillus fumigatus Af293	Fasciclin domain family protein	2	0.0739509	0.124587	1.54117	0.0735533	0.158206	0.182138	0.0309469	0.353203	0.572075	0.090116	0.694765	4.84066	89299.6	140499	141115	192643	155579	216244	219529	237010	181751	16099.9	154541	22964.9	10	10	10	0.9705
XP_752717.1	Aspergillus fumigatus Af293	prohibitin complex subunit Phb1, putative	17	0.00183291	0.0394556	1.1881	0.02284	0.0893645	1.18254	0.0309542	0.352013	0.975948	0.723007	0.951842	0.980539	674015	666835	665127	787801	829803	766942	686872	677038	691550	886307	789394	760118	576	576	576	1
XP_001481708.1	Aspergillus fumigatus Af293	respiratory complex assembly protein Rmp1, putative	15	0.00622733	0.0389529	0.897299	0.110768	0.204206	0.791607	0.0310611	0.352765	0.914066	0.769275	0.965866	1.03611	73228.7	69009.3	69266.3	63538.9	62323.9	63859.9	79791.9	77092	74509.3	63414.2	72585	49393.9	87	87	87	1
XP_751022.1	Aspergillus fumigatus Af293	1,3-beta-glucanosyltransferase	16	0.223889	0.307517	1.05839	0.018348	0.0804883	1.25321	0.0310614	0.351585	1.17007	0.829481	0.977155	0.988171	1322684	1463392	1379536	1490618	1394776	1522716	1245351	1099710	1217164	1622681	1438349	1405711	431	431	431	1
XP_001481505.1	Aspergillus fumigatus Af293	NUDIX family hydrolase, putative	3	0.671468	0.792705	1.03524	0.088437	0.17769	0.473851	0.031132	0.3508	0.766265	0.195331	0.759992	1.67408	22241	26027.7	25125.7	22949.3	25001	28125.5	30351.8	36324.7	29321.4	27529.6	8959.77	13944.5	14	14	14	0.9998
XP_753800.1	Aspergillus fumigatus Af293	AI-BP family protein	3	0.026622	0.0633242	1.22319	0.460406	0.61874	0.921315	0.0312533	0.350166	0.813193	0.475952	0.892308	1.07964	59641.9	67609.5	69633.9	75319.2	84921.7	80340.6	85568.7	82188.6	74245.9	87886.8	64304.8	72253	39	39	39	1
XP_752313.1	Aspergillus fumigatus Af293	NIF domain protein	3	0.0523535	0.0980117	1.14142	0.0632393	0.145869	0.497116	0.0313747	0.350119	0.812441	0.0827116	0.698367	1.86544	40210	42449.2	43800.1	46323.5	52237.2	45945	47782.8	58122.6	50197.9	43768.6	18486.4	21167	21	21	21	1
XP_747839.1	Aspergillus fumigatus Af293	ubiquitin C-terminal hydrolase, putative	34	0.707691	0.821393	0.986824	0.00483856	0.0535667	0.816128	0.0314229	0.349465	0.896344	0.0845418	0.704982	1.08382	405168	438986	449270	420098	421387	433790	482071	490135	469616	390544	416605	370722	501	501	501	1
XP_755791.1	Aspergillus fumigatus Af293	MFS monosaccharide transporter, putative	4	0.287361	0.381273	1.10616	0.293598	0.42911	0.801491	0.0315283	0.349132	0.637062	0.424795	0.868241	0.879223	27941.5	33042.2	24896.7	31389.7	31701.9	31263.5	35775.5	51436	48312.9	27343.6	37237.5	44954.7	38	38	38	1
XP_748011.1	Aspergillus fumigatus Af293	TFIIH complex helicase Ssl2, putative	10	0.0101205	0.042978	1.06231	0.0267168	0.0984438	1.12384	0.0315518	0.347987	1.06056	0.941298	0.992994	1.00249	41658.3	40945.8	40510.4	43744.8	42753.5	44292.6	39364.7	37460	39282.3	40954.5	44661.2	44952.5	51	51	51	1
XP_750387.1	Aspergillus fumigatus Af293	RNA polymerase III subunit C11, putative	2	0.298141	0.394063	1.3252	0.0269729	0.0992286	0.490104	0.0318103	0.348784	0.407269	0.552184	0.915205	1.10122	13720.3	21850	10404.5	17587	17697	23323.1	44031.4	41301.2	25390.2	13952.5	20069.9	19411.6	3	3	3	0.9961
XP_747964.2	Aspergillus fumigatus Af293	high-affinity iron transporter FtrA	3	0.114749	0.176593	0.391105	0.0513974	0.132099	2.74218	0.03212	0.350215	3.19506	0.171341	0.769127	0.455696	72519.1	80206.5	62691.4	15736.6	69614.1	19913.2	44094.3	18822.1	13470.5	74195.7	52902.3	58731.3	24	24	24	1
XP_001481407.1	Aspergillus fumigatus Af293	conserved hypothetical protein	6	0.822714	0.89716	1.02394	0.00653272	0.0595269	0.589213	0.0324351	0.351429	0.804577	0.0548833	0.664655	1.3982	27169.4	33531.8	31370.1	28181.8	29931.3	36373.4	39493	38499.9	36088.6	25240	18429.4	24130.5	34	34	34	1
XP_753300.1	Aspergillus fumigatus Af293	vacuolar armadillo repeat protein Vac8, putative	19	0.689133	0.806756	0.995005	0.994686	0.999266	1.0003	0.032491	0.351547	1.06103	0.240893	0.775	1.05542	131151	129916	132373	128510	133073	129921	123247	127600	120066	133294	118239	119912	209	209	209	1
XP_754482.1	Aspergillus fumigatus Af293	mitochondrial large ribosomal subunit L49, putative	8	0.207277	0.287516	1.04861	0.0207239	0.0861157	1.20382	0.0327477	0.351948	1.15244	0.926726	0.99152	1.00385	294670	275762	266313	294053	296568	286128	245290	227116	253795	312408	287556	274572	83	83	83	1
XP_752646.1	Aspergillus fumigatus Af293	adenylyl cyclase-associated protein (cap)	18	0.493888	0.628877	0.974607	0.0329327	0.107944	1.15446	0.0328016	0.35119	1.15361	0.486907	0.895431	0.973895	431956	420793	440514	435588	431356	394499	406762	356287	359873	431238	420891	442114	250	250	250	1
XP_755368.1	Aspergillus fumigatus Af293	ER membrane DUF1077 domain protein, putative	6	0.61304	0.741939	1.04069	0.0142735	0.0767563	1.40352	0.0330114	0.351538	1.20413	0.288803	0.794759	0.892849	85542.6	75501.1	81906.2	80205	95359.6	77956.9	67942.9	61796.7	72164.4	102670	82396.4	99023	69	69	69	1
XP_747923.1	Aspergillus fumigatus Af293	DNA directed RNA polymerase III subunit Rpc82, putative	13	0.66152	0.785686	1.01893	0.454909	0.612973	0.968768	0.0337171	0.358173	0.884692	0.142489	0.726119	0.930501	52082.9	54767.9	55700.8	57710.6	56445.8	51597.6	57630.9	64539.4	61691.7	57117.3	59810.7	61068.8	89	89	89	1
XP_746576.1	Aspergillus fumigatus Af293	conserved hypothetical protein	10	0.5211	0.655493	1.06039	0.0281934	0.100957	1.41726	0.0340319	0.360892	1.26871	0.659944	0.93929	0.949244	61291.6	61840.2	61578.6	58574.4	76925.1	61761.9	55608.1	47907	42902.2	66618.5	61951	78835.1	37	37	37	1
XP_754040.1	Aspergillus fumigatus Af293	glycyl-tRNA synthetase	46	0.399248	0.520831	1.03517	0.126149	0.228486	0.938248	0.0343346	0.362743	0.944074	0.424599	0.868173	1.0416	884341	922243	872280	927011	976225	872020	932432	949414	955060	879500	941808	843060	1017	1017	1017	1
XP_748101.1	Aspergillus fumigatus Af293	eukaryotic translation initiation factor eIF-4A subunit, putative	25	0.0700137	0.120088	0.949373	0.078437	0.164269	0.889922	0.0343517	0.361595	0.92771	0.840874	0.980938	0.989686	364262	366119	355150	352267	330981	347603	398897	398336	373336	326625	378547	338142	474	474	570	1
XP_753035.1	Aspergillus fumigatus Af293	conserved hypothetical protein	4	0.00419771	0.0359601	0.605635	0.59303	0.738303	0.811443	0.0343939	0.360454	2.10199	0.189999	0.755723	1.56886	39304.4	35222.4	38995.4	23659.4	19738.5	25679.6	11302.6	23441.5	21939	25238.1	11511.7	10689.6	21	21	21	1
XP_746361.1	Aspergillus fumigatus Af293	6-phosphofructokinase alpha subunit	48	0.0231501	0.0604521	1.07145	0.690801	0.814154	0.981624	0.0348061	0.365031	0.939425	0.591745	0.93182	1.02539	889635	946678	915278	995943	978094	973340	981142	987294	959849	1007601	991311	880479	1619	1619	1619	1
XP_754039.1	Aspergillus fumigatus Af293	RNA processing factor 1	10	0.530551	0.66574	0.974995	0.0271263	0.0987727	1.07015	0.0348593	0.364276	1.12442	0.274801	0.783269	1.02444	78331.6	85586.3	75992.1	79015.8	76481.6	78134.9	69856.9	70721.4	72537.1	74878.5	74657	78564.8	94	94	94	1
XP_752607.1	Aspergillus fumigatus Af293	WD repeat protein	17	0.0834956	0.13916	1.10023	0.0128189	0.0735928	0.933175	0.0350367	0.36565	0.875421	0.0849505	0.701648	1.03214	129920	129772	114893	138556	134884	138042	145017	142935	139296	134989	133623	130079	163	163	163	1
XP_752260.1	Aspergillus fumigatus Af293	WD repeat protein	13	0.0261817	0.0630437	1.09799	0.850809	0.916837	1.01298	0.035039	0.364511	0.919248	0.957897	0.993612	0.996387	88609.1	93331.1	88719.2	103199	96278.1	97749.7	102241	96495.4	95739.6	103482	88179.6	107596	123	123	123	1
XP_754245.1	Aspergillus fumigatus Af293	cation transporting ATPase, putative	54	0.45701	0.58848	1.0131	0.000270287	0.0481481	1.04711	0.0351897	0.364919	1.0442	0.299828	0.793459	1.01028	283527	285232	273019	288394	283652	280652	268350	269628	268023	280069	280732	283174	645	645	645	1
XP_001481550.1	Aspergillus fumigatus Af293	flocculation suppression protein	6	0.0291467	0.067046	0.87025	0.000148868	0.0785714	0.77319	0.0352512	0.364693	0.917506	0.426212	0.86905	1.03268	49858.6	53254	53128.4	48404.8	42817.9	44857.7	57408.7	57992.7	54858.2	43344.8	44337.5	43928.1	55	49	55	1
XP_753805.1	Aspergillus fumigatus Af293	RNA binding protein, putative	13	0.048011	0.0913657	0.851875	0.292357	0.4271	1.08183	0.0352523	0.363568	1.2056	0.450959	0.881597	0.949337	283410	331240	292658	273469	247219	251220	242458	269047	240349	247003	297658	270000	140	140	140	1
XP_747272.1	Aspergillus fumigatus Af293	Noc1p protein, putative	13	0.00365009	0.0365547	0.834354	0.00584608	0.0568571	0.87983	0.0353404	0.364554	1.05663	0.955302	0.994064	1.00202	334146	353461	348824	301668	285726	277622	324615	329878	326130	275002	290621	297609	110	110	110	1
XP_751201.1	Aspergillus fumigatus Af293	60S ribosomal protein L31e	13	0.759989	0.858884	1.01709	0.00206151	0.0564262	1.32092	0.0354022	0.363804	1.13547	0.0566181	0.665078	0.874295	3350027	3196786	2966982	3389086	3297303	2991627	2763055	2899179	2709477	3578893	3547913	3939612	322	322	322	1
XP_754568.1	Aspergillus fumigatus Af293	conserved hypothetical protein	5	0.015393	0.0494776	0.879054	0.200971	0.323751	1.16272	0.0357511	0.365407	1.18371	0.277045	0.784103	0.894923	319334	341638	326669	290160	301513	276708	257037	305431	273700	338893	274197	363482	88	88	88	1
XP_749370.1	Aspergillus fumigatus Af293	MYB DNA-binding domain protein	7	0.173726	0.248161	0.587734	0.0015204	0.052	0.339692	0.0358275	0.365232	0.665853	0.686048	0.936808	1.15206	67485.8	52872.4	77974.6	21090	54698.4	48965	100472	108186	86704.1	34806.7	40240.7	26374.7	30	30	30	1
XP_755790.1	Aspergillus fumigatus Af293	manganese ion homeostasis (Fr), putative	7	0.130069	0.196095	0.93359	0.0483549	0.128899	1.07308	0.0359312	0.365471	1.1142	0.312629	0.805121	0.969363	52716.2	47386.9	48324.8	46232.1	47329.1	44892.1	43507.7	45306.8	44274.5	49701	46173.5	46992.1	35	35	35	1
XP_751780.1	Aspergillus fumigatus Af293	homocitrate synthase	26	0.710304	0.822831	1.01343	0.043347	0.125531	1.1048	0.0359509	0.364364	1.07242	0.7172	0.950021	0.98373	1788082	1664598	1728988	1751577	1830217	1670877	1589996	1637835	1602239	1728888	1713319	1899521	1039	1039	1039	1
XP_001481721.1	Aspergillus fumigatus Af293	RNA polymerase II Mediator complex subunit Sin4, putative	6	0.216238	0.298178	1.15119	0.000336056	0.0419355	0.788418	0.036072	0.363843	0.784514	0.0842536	0.703176	1.14549	51076.3	66234.8	59456.3	67208.3	60968.3	74889.8	71658.6	76046.8	76445.7	58820.1	59102.2	58727.6	42	42	42	1
XP_749622.1	Aspergillus fumigatus Af293	proteasome component Pup1, putative	13	0.174439	0.248913	1.06331	0.520691	0.678087	1.02162	0.0360945	0.363169	0.921373	0.355992	0.832908	0.95897	269378	272408	279301	300185	302870	271014	310606	295030	285939	308710	292407	309516	187	187	187	1
XP_754628.1	Aspergillus fumigatus Af293	phosphatidylinositol transporter, putative	26	6.36709e-05	0.0187692	0.846017	0.00276319	0.058702	0.871546	0.036212	0.362859	1.05236	0.255158	0.781542	1.02154	801278	799725	818057	681864	689759	674916	749236	787878	761964	687798	658098	657857	563	563	563	1
XP_750171.1	Aspergillus fumigatus Af293	small nucleolar ribonucleoprotein complex subunit Utp14, putatrive	18	0.00063647	0.0333671	0.718724	0.0470115	0.128671	0.825414	0.036304	0.362132	1.11617	0.692047	0.936226	0.971895	73130.8	68187.3	65478.4	50324.4	49693.9	48473.7	63536	60778.5	60805.9	46739.1	48726	57981.4	130	130	130	1
XP_753392.1	Aspergillus fumigatus Af293	conserved hypothetical protein	8	0.0305319	0.067796	1.14779	0.338088	0.485995	0.904825	0.0365992	0.363284	0.839441	0.495014	0.899552	1.06485	43677.8	43092.5	44484.2	50466.4	53767.8	46658.5	46720	53930.4	56177.3	47972.5	41230.7	53012.5	56	56	56	1
XP_750551.1	Aspergillus fumigatus Af293	DnaJ chaperone (Caj1), putative	7	0.0398552	0.0802712	1.06541	0.206031	0.328716	0.81412	0.0366001	0.362202	0.853904	0.435043	0.87856	1.11748	227254	221394	225262	234353	248907	234970	253785	246768	290658	219310	263283	170107	49	49	49	1
XP_747994.1	Aspergillus fumigatus Af293	alpha glucosidase II, alpha subunit, putative	45	0.00146415	0.038755	1.17548	0.0195618	0.0832292	1.13251	0.0366244	0.361128	0.93915	0.48531	0.896714	0.974788	234641	225446	240204	269686	274723	278563	247470	245482	252511	291606	289383	264044	638	638	638	1
XP_747559.1	Aspergillus fumigatus Af293	splicing factor 3b subunit 4	7	0.0480388	0.0913287	1.17837	0.0239202	0.0939632	0.770812	0.0368088	0.360888	0.833115	0.0291958	0.730812	1.27362	287083	336732	302459	339004	378693	372660	383493	383241	344044	297982	309298	251258	38	37	38	1
XP_746714.1	Aspergillus fumigatus Af293	UDP-N-acetylglucosamine pyrophosphorylase	40	0.00691613	0.0395259	1.10586	0.258558	0.387285	0.944787	0.0368623	0.360236	0.868858	0.265506	0.782891	1.01699	889685	913346	864430	968821	1005822	974853	1093521	944665	1036693	975384	955887	968666	1089	1089	1089	1
XP_749623.1	Aspergillus fumigatus Af293	nuclear pore complex subunit Nup159, putative	32	0.0539044	0.0999934	0.915651	0.18003	0.299833	1.07168	0.0369483	0.3602	1.08472	0.179261	0.768756	0.926796	293511	274280	286310	253841	274437	254004	265621	268238	253462	292776	260115	291871	253	253	253	1
XP_751230.1	Aspergillus fumigatus Af293	carboxypeptidase CpyA/Prc1, putative	17	0.000525993	0.0324571	0.472132	0.00299568	0.0572593	0.422766	0.0370036	0.359144	0.834576	0.643801	0.936241	0.932028	186250	209850	209146	105266	84867.7	96297.6	231665	230432	263425	79437.3	112272	119142	187	187	187	1
XP_748967.1	Aspergillus fumigatus Af293	mitochondrial intermembrane space protein Mia40	7	0.546742	0.682001	0.928995	0.0377843	0.11784	1.2719	0.0371695	0.359743	1.34561	0.866981	0.986347	0.982831	267095	284862	331329	243510	326916	253891	246946	192131	218071	291877	262466	277901	132	132	132	1
XP_753527.1	Aspergillus fumigatus Af293	molybdopterin binding domain protein	13	0.926463	0.960519	0.993427	1.12901e-05	0.324	0.729164	0.0372317	0.358694	0.819495	0.0063734	0.581538	1.1165	191324	225556	236757	208742	222683	215495	261429	265906	267058	192807	189976	196491	227	227	227	1
XP_752092.1	Aspergillus fumigatus Af293	ubiquitin fusion degradation protein UfdB, putative	37	0.00129692	0.0343188	1.09839	0.132303	0.235925	1.05713	0.0372772	0.35836	0.948816	0.621227	0.934828	0.985847	188559	188350	185186	204556	209890	202997	203657	195970	192925	199368	216946	210308	312	312	312	1
XP_747854.1	Aspergillus fumigatus Af293	glucokinase	35	0.00326743	0.0374251	1.20397	0.176187	0.294084	1.07408	0.0372897	0.357322	0.917048	0.568459	0.918043	1.02795	852405	910279	852096	1023166	1090559	1034097	972982	960131	917695	1087964	1029250	948650	1168	1168	1168	1
XP_749114.1	Aspergillus fumigatus Af293	alpha,alpha-trehalose phosphate synthase subunit TPS3, putative	30	0.128213	0.194194	1.04073	0.880986	0.9339	0.993186	0.037365	0.356624	0.92524	0.486303	0.895386	0.969532	138424	145363	142347	151233	143571	148701	158134	155144	147397	148205	164162	145616	312	312	312	1
XP_747250.1	Aspergillus fumigatus Af293	oligosaccharyl transferase subunit (Stt3), putative	18	0.00824336	0.0400633	1.26062	0.0642304	0.146357	1.12793	0.0375516	0.356403	0.898468	0.945771	0.993225	1.00416	113681	111693	115646	130720	152025	148024	134593	119980	125373	149337	145590	133621	182	182	182	1
XP_749540.1	Aspergillus fumigatus Af293	GPR/FUN34 family protein	7	0.034688	0.0736724	1.08625	0.0156703	0.078497	1.32709	0.0377563	0.356678	1.18466	0.574083	0.921021	0.96967	956975	957972	1024409	1054858	1092414	1044576	752469	838608	895165	1088743	1012683	1197433	225	225	225	1
XP_755823.1	Aspergillus fumigatus Af293	NADH-ubiquinone oxidoreductase 12 kda subunit, putative	9	0.302192	0.398092	1.09923	0.00185976	0.0540357	1.68001	0.0378889	0.356688	1.29378	0.0641342	0.666688	0.846523	465814	378684	374760	414038	469268	451906	305758	292543	341266	538482	473240	567990	187	187	187	1
XP_754594.2	Aspergillus fumigatus Af293	cell division control protein (Cdc15), putative	7	0.233346	0.316362	1.03775	0.638343	0.7716	1.03639	0.0379924	0.356971	1.09073	0.273971	0.783679	1.09216	906499	895085	940621	920469	989538	936446	847207	799804	867997	968937	876298	771107	61	61	61	1
XP_748349.1	Aspergillus fumigatus Af293	GPI-anchored cell wall beta-1,3-endoglucanase EglC	9	0.00534501	0.0388114	1.27169	0.0121007	0.0707189	1.8341	0.0381518	0.357573	1.42448	0.895197	0.989833	0.987671	201433	198564	188919	269742	241929	238127	129386	117462	172012	291541	249502	221735	122	122	122	1
XP_755578.1	Aspergillus fumigatus Af293	conserved hypothetical protein	9	0.000579772	0.0348889	0.782856	0.34622	0.493744	0.909494	0.0383316	0.357489	1.16391	0.982175	0.996342	1.00185	141056	139605	143082	109785	106567	115547	132942	119802	112200	104177	100959	127820	112	112	112	1
XP_750296.1	Aspergillus fumigatus Af293	3-oxo-5-alpha-steroid 4-dehydrogenase, putative	6	0.198799	0.276446	0.633146	0.956531	0.975141	1.00898	0.0383442	0.356805	1.28979	0.549591	0.914075	0.809361	34585.2	31791.8	28488.9	29553	11285	23839	22937.1	27668.8	23003.3	26659.4	29994.7	18753	15	15	15	1
XP_753509.1	Aspergillus fumigatus Af293	mRNA cleavage factor complex II protein Clp1, putative	9	0.076932	0.128202	1.09474	0.274857	0.4064	0.863612	0.038374	0.35635	0.861714	0.474119	0.890939	1.09233	43639.3	46656.1	42332.3	50515.6	48356.3	46292.3	55390.1	48602.4	50035.5	51400.8	35803.6	47144.2	52	52	52	1
XP_750682.1	Aspergillus fumigatus Af293	PH domain protein	19	0.355766	0.464089	0.986242	0.00565742	0.0562605	0.907228	0.0387371	0.359448	0.944869	0.0941345	0.70415	1.02716	253294	253767	246638	244030	247121	252185	257384	269504	270930	238923	244887	239846	265	265	265	1
XP_750450.1	Aspergillus fumigatus Af293	cyclin, putative	8	0.334307	0.436231	1.03652	0.449749	0.607435	0.97089	0.0387751	0.359225	0.894279	0.20842	0.758242	0.954733	48664.3	52118.9	51484.6	54590.6	50153.7	53112.8	60192.9	55656.7	54500.6	56023.9	53109.2	56160.6	36	36	36	1
XP_750018.1	Aspergillus fumigatus Af293	small nucleolar ribonucleoprotein complex subunit Dip2, putative	39	0.0132055	0.0477487	1.0732	0.238134	0.364341	0.949492	0.0388914	0.359608	0.91142	0.33513	0.81501	1.03017	149910	150904	150823	156440	165205	163183	166330	173492	156168	156051	163168	151501	382	382	382	1
XP_748139.1	Aspergillus fumigatus Af293	cleavage and polyadenylation specific factor 5	16	0.386715	0.505638	1.06798	0.0343983	0.111284	0.820197	0.0389004	0.358603	0.806335	0.455552	0.883813	1.04993	300458	331806	359691	374264	323781	360465	371664	434944	423125	362556	317409	327954	241	241	241	1
XP_755414.1	Aspergillus fumigatus Af293	nuclear protein export protein Yrb2, putative	13	0.104903	0.165154	0.899401	0.363581	0.514795	1.12938	0.0390245	0.358474	1.19641	0.695004	0.936005	0.952778	97148.7	88352.6	103534	84877.1	90219.5	84432.4	86548.4	78012.3	76856.8	80892.5	81266.5	113711	119	119	119	1
XP_750509.1	Aspergillus fumigatus Af293	zinc knuckle domain protein (Byr3), putative	8	0.00429584	0.0356352	0.524248	0.00190195	0.0558938	0.383556	0.0391562	0.358422	0.780722	0.689923	0.936536	1.0671	207224	238348	239884	139197	99046.7	123820	267491	332778	279704	90128.7	132365	117764	177	177	177	1
XP_754426.1	Aspergillus fumigatus Af293	transcription regulator PAB1642, putative	9	0.00381865	0.0353171	1.30273	0.0677984	0.150534	1.1613	0.0391637	0.357429	0.87041	0.704557	0.939969	0.976413	108069	109181	122478	143371	152303	146318	135842	126891	127136	136230	152569	165132	109	109	109	1
XP_752949.1	Aspergillus fumigatus Af293	conserved hypothetical protein	10	0.224202	0.307624	0.944569	0.190079	0.311408	1.25893	0.0392475	0.357878	1.35564	0.887687	0.98621	1.01713	113324	103930	113793	105793	107956	98895.4	77186.7	71089.7	98038.2	122276	83780.1	104777	80	80	80	1
XP_754528.1	Aspergillus fumigatus Af293	glutaminase, putative	5	0.890813	0.942033	0.969852	0.29066	0.42492	0.680368	0.039387	0.359174	0.656927	0.86147	0.983852	0.936439	20104	23697.2	21210.7	24950.7	13971.8	26443.2	25426.1	36094.9	38838	21157.4	37862.7	14013.2	14	14	14	1
XP_752702.1	Aspergillus fumigatus Af293	6-phosphogluconate dehydrogenase family protein	15	0.0200862	0.0562645	1.10312	0.129083	0.231983	0.914476	0.0394139	0.358396	0.896423	0.119459	0.711229	1.08134	314965	339169	326703	358137	352501	371098	372905	343955	377741	347119	344421	309915	407	407	407	1
XP_755377.1	Aspergillus fumigatus Af293	40S ribosomal protein S11	12	0.0132358	0.0478644	0.884369	0.475269	0.633416	0.977881	0.0394817	0.357753	1.10196	0.896174	0.989875	0.99658	5643467	6206308	5903922	5139918	5246028	5304359	5545263	5316084	5242173	5328785	5405303	5016890	1084	1084	1084	1
XP_752336.1	Aspergillus fumigatus Af293	tRNA ligase	26	0.318726	0.418699	0.962957	0.0306247	0.105694	0.864549	0.0395182	0.356995	0.931694	0.501645	0.903565	1.03774	61741.9	61203.8	60139.9	60185.3	55129.4	61160.1	64194.5	68467	63932.5	55883.4	60872.3	53378.7	199	199	199	1
XP_754738.1	Aspergillus fumigatus Af293	nuclear import and export protein Msn5, putative	22	0.857895	0.91948	0.995612	0.530052	0.686089	1.03222	0.0395504	0.356719	0.950901	0.151322	0.737265	0.917177	88486.1	92253.3	90599	87023	93143	90046.3	96111	96306	92928.1	92345.2	95651.7	107099	139	139	139	1
XP_754965.1	Aspergillus fumigatus Af293	Coenzyme Q (ubiquinone) biosynthesis protein Coq4, putative	7	0.0651924	0.113345	1.13132	0.325027	0.468809	0.929915	0.0395568	0.355957	0.857755	0.537193	0.910549	1.04353	111976	118836	112975	134286	118458	136842	145862	131769	123939	134296	123727	115284	101	101	101	1
XP_747929.2	Aspergillus fumigatus Af293	conserved hypothetical protein	11	0.5421	0.676206	0.978793	0.0554541	0.136945	0.871581	0.039783	0.357388	0.896905	0.889351	0.985234	1.00723	47375.2	43205.2	42853.5	43446.2	43388.9	43633	49924.4	50751.4	47981.5	40590.9	41730.3	47520.1	49	49	49	1
XP_754687.1	Aspergillus fumigatus Af293	serine hydroxymethyltransferase, putative	39	0.289164	0.383949	1.05774	0.0404097	0.121535	1.11969	0.0398756	0.357276	1.06641	0.900581	0.99156	1.00742	3155109	3173679	3178735	3521636	3497499	3058243	3049929	3020568	2848887	3450998	3414352	3126730	2430	2406	2430	1
XP_752330.1	Aspergillus fumigatus Af293	PAB1 binding protein (Pbp1), putative	28	0.00919293	0.0423863	0.843757	0.101839	0.191313	0.87837	0.0399234	0.356593	1.06774	0.726987	0.953509	1.02567	236564	253446	251054	204587	220437	200488	230145	230789	232801	187450	195171	229050	398	398	398	1
XP_749420.1	Aspergillus fumigatus Af293	serine/threonine protein kinase, putative	8	0.887556	0.939172	1.02787	0.24593	0.374556	0.36937	0.0402173	0.35843	0.804551	0.344244	0.823432	2.23889	247906	199713	228666	277137	163903	270668	261882	279740	296739	174951	258267	24245.7	36	36	36	1
XP_755558.1	Aspergillus fumigatus Af293	cytochrome c oxidase assembly protein Cox11, putative	6	0.159935	0.232494	1.11276	0.0711365	0.155013	0.76654	0.0404877	0.358681	0.760045	0.312886	0.805406	1.10334	125965	153137	145954	152279	162982	156306	210402	184988	164754	144760	162951	122441	84	84	84	1
XP_748940.1	Aspergillus fumigatus Af293	guanyl-nucleotide exchange factor (Sec7), putative	61	0.124315	0.189028	1.05408	0.0571686	0.139688	0.895899	0.0406139	0.359241	0.927289	0.110798	0.711601	1.09102	143933	151962	147048	151641	152785	162585	165065	158476	154202	144510	150769	133130	579	579	579	1
XP_755911.1	Aspergillus fumigatus Af293	poly(A)+ RNA transport protein (UbaA), putative	59	0.0491998	0.0931096	1.07673	0.205355	0.327078	0.961625	0.0406561	0.359531	0.926097	0.244634	0.769237	1.03695	450852	474735	481212	489448	520064	505108	496153	522878	499846	472955	481940	505890	1402	1402	1402	1
XP_751612.1	Aspergillus fumigatus Af293	WD repeat-containing protein	9	0.0075496	0.0406461	1.18641	0.602571	0.742904	1.03787	0.0407107	0.36	0.86691	0.880825	0.988304	0.990985	54169.4	60181.7	58863.6	69001.7	69509.2	66814.1	69242.1	68642.8	61969.4	70894.5	74806.2	62089.6	74	74	74	1
XP_752958.1	Aspergillus fumigatus Af293	26S proteasome-associated ubiquitin C-terminal hydrolase, putative	13	0.216581	0.298544	1.1035	0.026054	0.0997827	1.36883	0.0407489	0.359353	1.28325	0.67871	0.936789	1.03452	153381	140083	135416	148754	176193	149173	110060	98258.4	127318	168429	147559	142086	103	103	103	1
XP_751967.1	Aspergillus fumigatus Af293	aldehyde dehydrogenase, putative	31	0.00959583	0.0411346	1.07259	0.106491	0.198166	1.0635	0.0408419	0.359873	0.947126	0.174703	0.765388	0.955224	373488	389780	383384	413132	413634	403020	411333	393269	406091	408167	433445	446628	498	497	498	1
XP_755709.1	Aspergillus fumigatus Af293	plasma membrane SNARE protein (Sec9), putative	14	0.000987085	0.0323894	0.713702	0.101409	0.190906	0.835552	0.0410088	0.360718	1.11181	0.581606	0.925711	0.949668	134035	125638	135927	88529.1	97683.5	96224.9	121271	112516	122064	99728	85847.3	113484	156	156	156	1
XP_751179.1	Aspergillus fumigatus Af293	AP-3 adaptor complex subunit sigma, putative	2	0.246819	0.332739	1.37064	0.167043	0.282174	0.702268	0.0411443	0.360368	0.548609	0.789232	0.969762	1.07074	14453.8	22253.1	27345	21662.9	30601.8	34162.8	33128.8	42903.8	37476.6	29471.4	18063	34656.2	20	20	20	0.9991
XP_749256.2	Aspergillus fumigatus Af293	actin polymerization protein Bzz1, putative	17	0.839339	0.910004	0.990536	0.00768227	0.0618742	0.818807	0.0418579	0.362488	0.890423	0.172565	0.76632	1.07717	100868	103691	91385.9	100652	93626.6	98574.9	109003	112314	110590	84191.6	96337.7	91636	120	120	120	1
XP_752462.1	Aspergillus fumigatus Af293	Coatomer subunit beta, putative	46	0.0309832	0.0689205	1.06635	0.0063866	0.05952	1.10071	0.0418936	0.361738	1.05945	0.231612	0.766768	1.02638	353681	363760	369042	385615	396698	376343	343495	332274	349821	383968	373897	370876	941	941	941	1
XP_751295.1	Aspergillus fumigatus Af293	ubiquitin conjugating enzyme (UbcB), putative	2	0.686902	0.804505	1.02954	0.171488	0.287005	0.556726	0.0419991	0.361441	0.81088	0.31294	0.804958	1.49954	83443.3	94558.7	78900.4	89576.5	81339.6	93239.8	100931	115614	100062	84171	82028.8	29180.9	30	30	30	1
XP_753982.1	Aspergillus fumigatus Af293	ribosome biogenesis	25	0.637977	0.764758	0.975438	0.117621	0.216514	1.10803	0.0420242	0.3605	1.10184	0.654087	0.938378	0.969994	160413	146734	145853	143066	158656	140376	137091	139604	134097	142491	146229	167554	296	296	296	1
XP_751213.1	Aspergillus fumigatus Af293	SSU processome component Utp10, putative	51	0.0143161	0.0483349	1.10266	0.170501	0.285416	0.949417	0.0420617	0.359771	0.931124	0.0628742	0.668039	1.08141	280248	284264	265660	303778	299705	311646	295864	304212	291273	269153	296878	280778	549	549	549	1
XP_754570.1	Aspergillus fumigatus Af293	DNA damage response protein (Dap1), putative	8	0.00100799	0.0323419	0.879184	0.0202815	0.0842881	0.844326	0.0420652	0.358839	0.933497	0.533481	0.910869	0.972036	210510	211492	219844	188783	189549	185881	220844	231834	235007	201030	178168	202201	180	180	180	1
XP_752394.1	Aspergillus fumigatus Af293	C2H2 finger domain protein (Gli3), putative	6	0.917283	0.957873	1.01083	0.131764	0.235161	0.506561	0.0422931	0.359049	0.779109	0.291011	0.793999	1.5547	33567.3	40927.6	42892	37658.1	36350.3	44461.2	46567.5	53370.1	50134	36561.3	35801.4	12373.3	60	60	60	1
XP_752225.1	Aspergillus fumigatus Af293	conserved hypothetical protein	7	0.495008	0.630182	1.03078	0.0149168	0.0765935	1.14724	0.0423462	0.35832	1.10046	0.79734	0.971567	0.98875	185140	176086	181466	187525	174161	198381	163797	173122	156544	183750	187521	194525	100	100	100	1
XP_755487.1	Aspergillus fumigatus Af293	ergosterol biosynthesis protein Erg28, putative	4	0.0267713	0.06324	1.38465	0.305829	0.44297	0.881873	0.0426665	0.360278	0.759042	0.180136	0.764758	1.19179	199910	246199	219440	289919	279301	354088	318926	306634	252539	230792	299800	244797	47	47	47	1
XP_747336.1	Aspergillus fumigatus Af293	signal peptidase complex component, putative	8	0.00210606	0.0368696	1.21644	0.0135494	0.0749414	1.57408	0.0426965	0.359559	1.30038	0.944117	0.993393	1.00493	171063	174675	163594	198582	209035	211966	148540	110483	135458	191410	232857	194522	84	84	84	1
XP_755864.1	Aspergillus fumigatus Af293	DUF636 domain protein	10	0.0932352	0.151408	0.728588	0.0188765	0.0821741	0.522846	0.0432744	0.363581	0.770166	0.7468	0.957433	1.07323	1937249	2098103	2168883	1894287	1167057	1542257	2518157	2423877	3161560	1044184	1673126	1578744	498	498	498	1
XP_754054.1	Aspergillus fumigatus Af293	conserved hypothetical protein	3	0.108317	0.169475	0.372101	0.372812	0.525745	1.35727	0.0433722	0.363214	2.14316	0.35138	0.829917	0.587557	46935.8	42126.8	35048.4	6552.38	33492.2	16269.4	31206.1	14012	16100.2	19453	25144.5	35986	11	11	11	1
XP_747387.1	Aspergillus fumigatus Af293	FAD dependent oxidoreductase superfamily	6	0.430324	0.560561	1.13093	0.0228354	0.0895039	0.502326	0.0435191	0.363359	0.690622	0.0925826	0.699524	1.55485	38614.6	34224.4	48929.8	49770.4	37671.9	49885.6	59815.7	64681.6	50739.4	39055.5	30108.5	21160.6	36	36	36	1
XP_749143.1	Aspergillus fumigatus Af293	conserved hypothetical protein	15	0.0596754	0.10789	1.09575	0.19535	0.316912	0.912955	0.0436582	0.364426	0.872752	0.404423	0.857656	1.04749	186950	189619	202988	217189	201562	216253	211020	239143	214500	188616	199422	218980	272	272	272	1
XP_752071.1	Aspergillus fumigatus Af293	small nucleolar ribonucleoprotein complex subunit, putative	28	0.731023	0.836134	1.00877	0.417892	0.57321	1.01584	0.0438316	0.364891	1.0734	0.0177554	0.713976	1.06593	200745	205056	192142	200700	206037	196345	181370	190943	184665	191606	185946	188160	339	339	357	1
XP_747619.1	Aspergillus fumigatus Af293	pre-rRNA processing protein, putative	3	0.670006	0.792401	0.812371	0.531969	0.687926	1.13697	0.043835	0.36397	2.42753	0.224315	0.759374	1.73449	52875.8	23012.4	56086.1	48537.8	45635.9	16517.8	17321.5	19764.4	13935.1	25953.5	17664.9	15293.8	16	16	16	0.9998
XP_747957.1	Aspergillus fumigatus Af293	signal recognition particle protein SRP54	21	0.30975	0.408696	0.955782	0.00383591	0.0599171	0.776767	0.0440873	0.364665	0.888253	0.090818	0.698984	1.09296	238655	251807	268311	249465	233430	241761	285349	295396	272953	229643	228008	205938	265	265	265	1
XP_748147.1	Aspergillus fumigatus Af293	histone H2A	5	0.632617	0.75957	0.951322	0.0728085	0.158017	1.6023	0.0445279	0.367015	1.25919	0.223932	0.758607	0.747611	316199	252176	258880	255710	294632	235895	208854	211811	233718	297480	279666	511236	42	42	73	1
XP_748907.1	Aspergillus fumigatus Af293	alpha-ketoglutarate-dependent taurine dioxygenase	10	0.0261476	0.0631889	1.16905	0.962801	0.978599	0.992324	0.0445431	0.366095	1.18792	0.0891183	0.698225	1.39948	86932.8	91577.8	86175.7	104474	109897	95469.2	67122.5	81600.7	74719.7	97883.3	67003.2	60975.3	46	46	46	1
XP_749195.1	Aspergillus fumigatus Af293	glutathione S-transferase, putative	9	0.033086	0.0717732	1.58027	0.177158	0.295317	1.24286	0.0447453	0.36687	0.693932	0.447589	0.880386	0.882319	63815.3	74745.1	49951.8	94338.1	114700	86896	94088	93325.6	81203.2	93379.1	141196	103824	66	66	66	1
XP_754227.2	Aspergillus fumigatus Af293	phosphatidylserine decarboxylase Psd2, putative	45	0.173309	0.247511	1.03485	0.0158317	0.078419	1.11445	0.0449036	0.366833	1.0573	0.546487	0.915098	0.981783	227086	220902	224616	226434	228922	240900	213154	205207	217947	246149	231629	231434	539	539	539	1
XP_755482.1	Aspergillus fumigatus Af293	acetyltransferase,	6	0.173853	0.248391	1.17321	0.902611	0.944453	1.01829	0.0449095	0.366179	0.792574	0.574951	0.921186	0.913152	57045.1	61042.6	54900.5	67058.3	57905.9	79502.6	64486	83321.3	71463.7	58528.2	82366.9	84102.6	58	58	58	1
XP_747553.1	Aspergillus fumigatus Af293	SUMO ligase SizA, putative	5	0.520109	0.654559	0.377055	0.210775	0.333754	0.164658	0.0451725	0.366819	1.28774	0.587917	0.930031	2.94882	443558	393605	484563	594384	10427.5	731688	380714	341205	304977	612114	23708.9	12186.7	13	13	13	1
XP_752742.1	Aspergillus fumigatus Af293	intracellular protein transport protein (UsoA), putative	32	0.00989197	0.0421619	0.90997	0.00708115	0.0585526	0.916517	0.0451768	0.365911	1.05219	0.0938615	0.704053	1.04468	228402	219756	218770	197030	202214	207665	213444	206559	213803	193142	189547	198229	167	167	167	1
XP_747667.2	Aspergillus fumigatus Af293	Mis6 domain protein	5	0.00189379	0.0389942	8.07257	0.0412258	0.122345	0.23958	0.0452546	0.365304	0.23489	0.00108256	0.464333	7.91454	13446.6	15255.1	28621.8	105053	161945	181545	50628.4	47733.2	187463	13630.1	17995	25399.8	19	19	19	1
XP_746476.1	Aspergillus fumigatus Af293	sensor histidine kinase/response regulator, putative	8	0.759579	0.858655	0.940769	0.0313052	0.106874	0.604847	0.0454511	0.365005	0.874262	0.265358	0.783864	1.35981	27001.9	26881.2	27624.1	19110.3	36150.2	24165.8	29116.9	33966	30340.1	25186.4	16778	15712.3	25	25	25	1
XP_755075.1	Aspergillus fumigatus Af293	mitochondrial carrier protein, putative	10	0.105766	0.166491	1.13239	0.251325	0.380796	0.843642	0.0457387	0.364688	0.861577	0.326865	0.809118	1.15647	80767.9	96336.9	90686.2	105596	95345.1	101770	102279	103446	104277	85506.1	109563	70713.6	156	156	156	1
XP_750929.1	Aspergillus fumigatus Af293	vacuolar protein sorting protein (VPS11), putative	22	0.413004	0.538251	0.979731	0.0729789	0.15833	0.925129	0.0461535	0.367314	0.943053	0.971096	0.994469	0.998712	322707	333459	324537	312061	333115	315938	336098	346488	357563	308852	316084	337724	118	118	118	1
XP_752799.1	Aspergillus fumigatus Af293	small nuclear ribonucleoprotein (LSM7), putative	3	0.0779689	0.129286	1.16344	0.148932	0.257694	0.850423	0.0463369	0.369134	0.851435	0.186716	0.761204	1.16482	231143	265148	262834	300980	268602	313785	277900	299981	313049	277356	271171	213412	62	62	62	1
XP_750629.1	Aspergillus fumigatus Af293	40S ribosomal protein S8	11	0.0128255	0.0478966	1.16195	0.279517	0.411804	1.08251	0.046624	0.370215	0.913377	0.776316	0.967238	0.980406	202878	205141	205897	244290	247966	221921	221372	237805	213621	268254	221944	239602	105	105	105	1
XP_750040.1	Aspergillus fumigatus Af293	pyridoxal kinase, putative	6	0.335183	0.437121	1.12947	0.0144381	0.076499	0.695916	0.0468027	0.371659	0.756694	0.114555	0.706061	1.22811	36485.6	46936.3	50347.9	45465.2	50017.5	54630.3	59169.1	58480.1	57510.6	42129.8	46258.7	34414.1	56	56	56	1
XP_750122.1	Aspergillus fumigatus Af293	UPF0136 domain protein	3	0.0240919	0.0618015	1.83302	0.331302	0.475821	0.688584	0.0468505	0.371534	0.598781	0.234024	0.770063	1.59396	241043	361773	350494	464291	598541	677373	619102	561772	409340	456712	527328	192999	119	119	119	1
XP_753630.1	Aspergillus fumigatus Af293	NRPS-like enzyme, putative	64	0.963964	0.981774	0.998268	0.531269	0.687224	1.02421	0.0473268	0.376184	1.09158	0.19199	0.756801	1.06394	342778	379498	370799	369513	370993	350032	332387	335622	332427	360256	319929	345692	1097	1097	1097	1
XP_755078.1	Aspergillus fumigatus Af293	actin-bundling protein Sac6, putative	46	0.0514581	0.0963474	1.05561	0.213596	0.336096	0.95375	0.0473455	0.375527	0.938275	0.278424	0.784757	1.03848	1017241	1087179	1061096	1108670	1111184	1120475	1110391	1150010	1112530	1117681	1090108	1011592	1006	1006	1006	1
XP_751183.1	Aspergillus fumigatus Af293	conserved hypothetical protein	2	0.0706013	0.120657	0.822708	0.0327601	0.10819	0.630125	0.047406	0.375345	0.883929	0.417915	0.866263	1.15408	706205	752774	733210	617093	519560	676979	767914	879193	835938	445966	686621	461140	6	6	6	0.9705
XP_752352.1	Aspergillus fumigatus Af293	37S ribosomal protein S11, putative	8	0.200387	0.27856	0.902187	0.0761919	0.160857	1.17916	0.0474648	0.374625	1.14163	0.184324	0.762363	0.873473	215300	219066	235805	217834	210005	178528	198163	207085	182150	256876	226741	210407	116	116	116	1
XP_754752.1	Aspergillus fumigatus Af293	coactivator bridging factor 1 (Mbf1), putative	9	0.0345535	0.0735065	0.891286	0.37087	0.523025	1.07906	0.0476793	0.374446	1.11038	0.314735	0.80392	0.917156	531154	506001	524900	492594	462219	438694	487386	482684	438027	448012	565507	511025	142	142	142	1
XP_750615.1	Aspergillus fumigatus Af293	sreptomyces cyclase/dehydrase family protein	6	0.363283	0.475066	1.10396	0.107376	0.199582	0.607087	0.048173	0.377837	0.750123	0.263535	0.785642	1.36407	78192.1	92148.7	105662	95200.5	98425.6	109317	131146	125369	109705	91050	95915.9	46212.1	49	49	49	1
XP_747984.1	Aspergillus fumigatus Af293	nucleotide binding protein, putative	7	0.80205	0.884075	1.00357	0.765047	0.861078	0.973872	0.0481924	0.376936	1.05074	0.386788	0.853445	1.08277	90888.1	92947.4	90709.5	90090.4	91946.2	93502.4	85754.4	85702.8	89880.3	90833.4	93109.7	72140.8	41	41	41	1
XP_747201.1	Aspergillus fumigatus Af293	ribosome recycling factor, putative	5	0.48589	0.621543	0.974642	0.0243418	0.0952049	1.27909	0.04825	0.3766	1.19209	0.103453	0.71068	0.908345	153760	152195	144249	139386	153048	146503	120505	116870	141489	154677	155587	173277	61	61	61	1
XP_750532.1	Aspergillus fumigatus Af293	Rho	11	0.223053	0.305505	0.949946	0.168279	0.282836	0.758974	0.0484901	0.378024	0.887134	0.554505	0.915197	1.11035	55684.8	49579.2	54465.4	50358.3	50639.5	50546.7	62789	58173.5	58963	49687.3	57075	33203.1	42	42	42	1
XP_755289.1	Aspergillus fumigatus Af293	biotin apo-protein ligase, putative	6	0.269761	0.360193	1.17374	0.0705531	0.154304	0.616195	0.0485311	0.377374	0.786481	0.137067	0.728447	1.4981	21437.4	28424	26645.5	32460.9	24748.7	32679.8	32503.1	32325.5	31764.8	29041.9	17956.2	14973.8	21	21	21	1
XP_749502.1	Aspergillus fumigatus Af293	HMG-CoA reductase	39	0.391831	0.511793	1.02844	0.0632834	0.14585	1.11154	0.0485568	0.376662	1.0502	0.579013	0.922972	0.971684	250712	247280	242266	256655	264330	240820	235426	240577	228943	275111	242006	267473	611	611	611	1
XP_755097.1	Aspergillus fumigatus Af293	cystathionine beta-synthase, putative	34	0.0416109	0.0824081	1.10136	0.0348189	0.113205	0.954716	0.0486293	0.376198	0.921971	0.0428466	0.685321	1.06359	381288	417070	386151	422399	433949	447557	429533	432398	421879	410551	398769	416488	709	709	709	1
XP_752485.1	Aspergillus fumigatus Af293	conserved hypothetical protein	4	0.00425881	0.0357228	1.29927	0.808114	0.887878	0.954145	0.0487039	0.376047	0.882295	0.36788	0.840161	1.20143	104740	110044	121641	145000	147656	143625	128672	125271	126643	138927	150902	84582	56	56	56	1
XP_752399.1	Aspergillus fumigatus Af293	conserved hypothetical protein	10	0.751811	0.853359	0.986875	0.0191276	0.0829982	1.50535	0.0490029	0.378075	1.34397	0.0451794	0.674442	0.88108	47606.1	50269.8	53162.7	48716	51906.4	48358.3	38577.9	31015	43802.4	59756.7	52495.3	56991.5	29	29	29	1
XP_755799.1	Aspergillus fumigatus Af293	eukaryotic translation initiation factor 3 subunit EifCd, putative	34	0.00880205	0.0414298	1.24457	0.840476	0.911353	1.00996	0.0490975	0.377461	0.883452	0.148456	0.732924	1.08868	705973	782224	814579	924643	980066	956925	877201	878988	846098	910826	920480	801605	909	909	909	1
XP_747572.1	Aspergillus fumigatus Af293	DUF410 domain protein	17	0.0119657	0.0461708	1.21887	0.797449	0.882169	0.975758	0.0492766	0.378729	0.860007	0.444094	0.879938	1.07428	881270	1028186	965799	1154686	1181345	1161715	1161683	1128652	1049333	1217647	1139617	921102	345	327	345	1
XP_750382.1	Aspergillus fumigatus Af293	conserved hypothetical protein	21	0.171192	0.244966	0.889252	0.0107521	0.06856	0.690375	0.0494592	0.3789	0.897166	0.225505	0.760746	1.15561	29850.8	31647.7	30720.3	24155.3	30596.4	27613.2	33529.1	36684.5	32673.9	26494.7	24272.4	20563.2	68	68	68	1
XP_747360.1	Aspergillus fumigatus Af293	oxidoreductase, short chain dehydrogenase/reductase family	10	0.0158225	0.0499425	1.33792	0.0202519	0.0844295	1.86294	0.0494777	0.378019	1.30554	0.698077	0.936978	0.937608	58109.6	52118.3	55139.1	77347.1	64755.8	79849.1	38516	38555.5	50536.1	59726.8	94666.6	85814.9	52	52	52	1
XP_751694.1	Aspergillus fumigatus Af293	prenyltransferase, putative	14	0.07875	0.130956	0.908187	0.0291983	0.101792	0.884914	0.0495021	0.377142	0.937684	0.48558	0.896459	0.962345	164200	162945	155180	150275	135624	152600	168060	176462	169811	149733	144182	161642	169	169	169	1
XP_751806.1	Aspergillus fumigatus Af293	transcription factor RfeF, putative	19	0.00555828	0.04	1.27095	0.00399574	0.0591	1.55681	0.0495341	0.376269	1.18302	0.604088	0.934875	0.965799	484567	550237	537901	638747	679160	678723	484255	416760	429206	613969	716435	743037	555	555	555	1
XP_754785.1	Aspergillus fumigatus Af293	aspartyl aminopeptidase	24	0.00124218	0.0347368	1.19675	0.273311	0.404689	1.0596	0.0496887	0.376434	0.926195	0.34927	0.826822	1.04608	472464	507582	491308	577918	592207	590070	513159	528823	546461	599708	566474	519304	566	566	566	1
XP_748918.1	Aspergillus fumigatus Af293	stearic acid desaturase (SdeA), putative	24	0.0165901	0.0503953	0.882368	0.00421558	0.057717	0.798421	0.0499375	0.377198	0.880178	0.216949	0.754234	0.97272	938013	916691	852354	777018	798225	811792	1095446	1011961	969586	839700	800836	813523	572	572	572	1
XP_751577.2	Aspergillus fumigatus Af293	conserved hypothetical protein	7	0.00939332	0.0418274	0.725555	0.0411003	0.12228	0.889294	0.0501146	0.378593	1.10445	0.21332	0.752164	0.901097	120373	124490	116320	93737.4	76598.5	92725.4	102961	110223	114008	101696	93153.7	96053.2	48	48	48	1
XP_755224.1	Aspergillus fumigatus Af293	voltage-gated chloride channel (ClcA), putative	7	0.350582	0.457147	0.855889	0.000882456	0.0412923	0.643697	0.0501224	0.377725	0.928466	0.240941	0.774337	1.23453	32525	33639.1	32638.5	33289.8	21024.7	31989.2	33821.1	35941.5	36703.6	24782.5	22409.9	21426.5	41	41	41	1
XP_750221.1	Aspergillus fumigatus Af293	C-8 sterol isomerase (Erg-1), putative	6	0.00282418	0.0373392	1.65007	0.834248	0.90662	1.04273	0.0501786	0.377318	0.759997	0.355001	0.832696	1.20266	616795	693848	590878	941765	1041844	1157885	983611	736498	795194	900722	1133506	639689	238	238	238	1
XP_754851.1	Aspergillus fumigatus Af293	conserved hypothetical protein	8	0.958103	0.978738	0.99672	0.495291	0.65243	0.724948	0.0502902	0.37663	0.803994	0.82559	0.977603	1.1054	40148.3	43009	37679.5	42182.7	36673.7	41645	43637.5	52768.5	54367.4	42853.4	68501.8	16248.2	25	25	25	1
XP_754007.1	Aspergillus fumigatus Af293	SNF2 family helicase/ATPase (Ino80), putative	34	0.749325	0.852082	0.993154	0.350332	0.499171	0.968138	0.0503625	0.376282	0.941375	0.301275	0.792417	0.965699	163297	160862	161677	156419	167023	159246	167564	179463	169292	160196	172859	166825	317	317	317	1
XP_752690.1	Aspergillus fumigatus Af293	conserved hypothetical protein	27	0.0623281	0.110991	1.07862	0.0579072	0.13997	0.921206	0.0504031	0.375427	0.930206	0.066102	0.665688	1.08916	144788	150504	138146	157492	150894	158962	154570	157738	153398	147588	147111	134666	199	199	199	1
XP_754783.1	Aspergillus fumigatus Af293	4-nitrophenylphosphatase	9	0.0319568	0.0701513	1.17597	0.000953208	0.0431045	1.24353	0.0504309	0.374576	1.06912	0.838895	0.97946	1.01103	103247	100602	107988	121675	132517	113130	99600.4	95672.5	96323.7	120961	116344	125419	90	90	90	1
XP_753513.1	Aspergillus fumigatus Af293	AP-3 adaptor complex subunit beta, putative	11	0.00816594	0.0403371	1.2255	0.010772	0.068806	0.885071	0.0510108	0.375882	0.887238	0.00105625	0.481091	1.22851	56101.6	61708.4	55182.4	73638.7	68077.8	70137.9	62010.6	67823.3	65036	58371.7	57108	56889.8	84	84	84	1
XP_746810.1	Aspergillus fumigatus Af293	farnesyl-diphosphate farnesyltransferase, putative	30	0.0386998	0.0791048	1.0753	0.694402	0.815605	0.982519	0.051221	0.375991	0.93062	0.673746	0.938256	1.0185	478888	501324	468168	530888	518602	507574	533670	518724	503764	531344	527385	472014	603	603	603	1
XP_747592.1	Aspergillus fumigatus Af293	vacuolar protein sorting-associated protein VpsB	21	0.342739	0.445781	1.03188	0.100749	0.190683	0.922878	0.0513512	0.375144	0.937836	0.317917	0.806292	1.04861	152796	159065	148132	159795	151980	162883	160178	166321	163834	161769	143404	147888	169	169	169	1
XP_751997.2	Aspergillus fumigatus Af293	conserved hypothetical protein	4	0.0862413	0.142602	0.917604	0.0313308	0.106591	1.19314	0.0514665	0.375209	1.15588	0.0427703	0.687412	0.888943	72784.4	67793.7	69893.7	68049.3	64267.1	60928.3	55123.9	62821.4	64488.6	73163.6	69096.8	75033.8	39	39	39	1
XP_755512.1	Aspergillus fumigatus Af293	small nuclear ribonucleoprotein (LSM1), putative	4	0.010886	0.0439848	1.21691	0.218438	0.343211	0.892086	0.0518888	0.377363	0.862859	0.0854195	0.700739	1.17704	170442	193633	170823	212452	221087	216301	219658	195955	203883	199966	194918	159844	55	55	55	1
XP_746485.1	Aspergillus fumigatus Af293	vesicle-mediated transport protein (Imh1), putative	20	0.51219	0.647374	0.981402	0.0110579	0.0681073	0.77355	0.0521181	0.377324	0.911164	0.0525397	0.673708	1.15599	77428.9	77994.4	82492.1	75247.7	78822.6	79391.9	83350.8	91576.7	86276.9	73818.4	62060.2	66539.1	108	108	108	1
XP_746697.1	Aspergillus fumigatus Af293	C2 domain protein	29	0.300334	0.395981	1.03828	0.0247473	0.0961205	0.86238	0.0522912	0.377205	0.915242	0.0800196	0.689274	1.10192	110310	101401	112262	111988	112716	111345	116243	119510	117898	109866	100268	95357	213	213	213	1
XP_754318.1	Aspergillus fumigatus Af293	t-complex protein 1, gamma subunit (Cct3), putative	37	0.230788	0.312967	0.969093	0.193946	0.314596	1.02736	0.0522935	0.376365	1.05913	0.962603	0.99444	0.999064	765375	722243	764184	715801	743457	722443	706496	698778	720203	747610	710121	726212	832	832	832	1
XP_755508.1	Aspergillus fumigatus Af293	signal transduction protein BroA, putative	19	0.0368738	0.0770471	0.90865	0.842033	0.912047	1.01434	0.0523023	0.375529	1.05855	0.494891	0.899976	0.94826	576203	560337	559661	485374	520808	536272	539382	515262	548132	506260	509724	616095	194	194	194	1
XP_747247.1	Aspergillus fumigatus Af293	RNA binding protein, putative	15	0.145226	0.214117	0.898249	0.338985	0.486846	1.1112	0.0526806	0.379379	1.23307	0.971052	0.994972	0.996759	96537.9	113438	94460.9	91180.1	92886.1	88521.5	84656.7	87761.5	74264.6	77382.3	96652	101222	159	159	159	1
XP_746586.1	Aspergillus fumigatus Af293	membrane-spanning ATPase, putative	18	0.00127227	0.0348235	0.755181	0.0198957	0.0842594	0.895507	0.0527546	0.379204	1.08236	0.0596817	0.667268	0.912754	72033.9	70429.7	66356.4	52319.9	54928.2	50450.6	64131.7	66102.8	62627.8	60484.7	56355.4	55935.4	126	126	126	1
XP_751225.1	Aspergillus fumigatus Af293	glutamate decarboxylase	20	0.0563073	0.102902	0.842209	0.579436	0.728946	1.04709	0.0527578	0.378366	1.21724	0.775179	0.966148	0.979072	252982	219915	272729	214056	207072	204497	190064	207096	213734	243882	197934	200075	271	256	271	1
XP_754016.1	Aspergillus fumigatus Af293	5-proFAR isomerase His6, putative	9	0.974001	0.987374	1.0019	0.318332	0.460869	0.928603	0.0527607	0.377533	0.886927	0.577725	0.922412	0.956936	164191	153980	146011	164401	158529	142451	172248	183812	167114	144164	174531	168384	91	91	91	1
XP_755990.1	Aspergillus fumigatus Af293	cyanate hydratase, putative	8	0.127898	0.193671	1.15208	0.339913	0.487699	1.07195	0.0528436	0.377284	0.889427	0.635087	0.934903	0.955918	139475	147384	152619	181008	146891	180432	163038	155970	175345	158263	186609	185964	99	99	99	1
XP_754511.1	Aspergillus fumigatus Af293	MAP kinase kinase kinase (Bck1), putative	10	0.557263	0.693363	0.97645	0.331387	0.47568	1.13561	0.0530232	0.378088	1.18146	0.887313	0.986747	1.01588	606168	596970	580568	546771	617349	579444	532279	446301	536260	675529	574554	480674	33	32	33	1
XP_753362.1	Aspergillus fumigatus Af293	small nuclear ribonucleoprotein SmD2, putative	4	0.00191262	0.0392139	1.44163	0.165072	0.278859	1.12163	0.0530527	0.37726	0.826184	0.268287	0.783342	1.0619	194773	219163	213508	285876	322268	296399	274168	262400	224647	274276	301350	275910	98	98	98	1
XP_752265.2	Aspergillus fumigatus Af293	UPF0160 domain protein MYG1, putative	19	0.294691	0.389898	1.0796	0.027096	0.0989132	0.889643	0.0530982	0.376437	0.837937	0.622954	0.936332	1.01686	399168	487643	453184	504078	463414	475177	509671	561057	524325	473710	487953	456724	349	349	349	1
XP_755450.1	Aspergillus fumigatus Af293	origin recognition complex subunit Orc4, putative	4	0.0218287	0.0580356	1.55393	0.233353	0.359407	0.746999	0.0532186	0.37641	0.634453	0.183132	0.762093	1.31981	20724.8	17522.3	15675.9	24645.5	33072	26206.5	28573.8	35989.9	21675.4	24694.7	24028.2	15658.5	12	12	12	1
XP_752829.1	Aspergillus fumigatus Af293	transcription initiation factor TFIID, 31kD subunit, putative	7	0.0314218	0.0698289	0.855105	0.0897516	0.179157	0.912457	0.0533395	0.376504	1.12014	0.36539	0.839073	1.04973	254717	249440	246150	226946	194831	221157	217035	211985	241866	206313	202086	202762	50	50	50	1
XP_747234.1	Aspergillus fumigatus Af293	AAA family ATPase, putative	29	0.148248	0.217878	1.11311	0.0291268	0.10171	0.839225	0.0534102	0.376243	0.839012	0.0836084	0.701387	1.11282	91201.3	105651	107389	111412	107560	119086	123687	126757	111746	94470	106609	102820	131	131	131	1
XP_754750.1	Aspergillus fumigatus Af293	C1 tetrahydrofolate synthase, putative	54	0.933271	0.963364	0.997253	0.928802	0.958904	1.00419	0.0535173	0.376372	1.06247	0.33386	0.814185	1.05513	731143	775776	745663	768133	767648	711374	687229	719123	713555	764787	662176	705130	1205	1205	1205	1
XP_751647.1	Aspergillus fumigatus Af293	cell cycle control protein (Cwf19), putative	8	0.0334615	0.0717546	0.860002	0.0670939	0.149967	0.693107	0.0535205	0.375559	0.819652	0.907098	0.991212	1.01702	48105.2	54074.3	47546.4	42700.9	41204.4	44711.4	56860.1	68632.4	57553.9	37823.5	35973.2	54963.1	31	31	31	1
XP_749945.1	Aspergillus fumigatus Af293	conserved hypothetical protein	6	0.0042994	0.0355195	0.787168	0.235281	0.361048	0.892009	0.0535699	0.375543	1.2134	0.298976	0.793366	1.07078	103652	102515	94665.6	74378.7	80871.9	81566.3	90928.5	84959.7	72883.6	73132.3	67895.3	80482.7	62	62	62	1
XP_749951.1	Aspergillus fumigatus Af293	C2H2 finger domain protein, putative	23	0.000753185	0.0322273	0.780834	0.0475215	0.128943	0.849484	0.0537718	0.375862	1.07418	0.836839	0.978385	0.987374	120814	114750	116138	94452.4	87793.7	92437.2	105485	108479	113520	86335	89584.8	102957	203	203	203	1
XP_749533.1	Aspergillus fumigatus Af293	alpha,alpha-trehalose-phosphate synthase subunit, putative	22	0.656175	0.782098	1.01769	0.0431191	0.124822	0.871986	0.0538005	0.375056	0.923272	0.221072	0.758777	1.07754	263676	282524	267750	284038	259970	284706	283542	293329	304714	245744	278574	245454	386	316	386	1
XP_753525.1	Aspergillus fumigatus Af293	oxidoreductase, short chain dehydrogenase/reductase family	9	0.51978	0.654255	1.0454	0.0838958	0.172363	1.07201	0.0541049	0.376445	0.897645	0.0811174	0.687692	0.875365	244470	242761	267237	252282	245316	292780	266768	290790	282667	293560	296796	310050	174	174	174	1
XP_753767.1	Aspergillus fumigatus Af293	myosin type II heavy chain, putative	63	0.00516861	0.0387918	0.862466	0.00284399	0.0578581	0.790517	0.054158	0.376154	0.949212	0.43575	0.879391	1.0356	213041	215145	204059	175402	188718	181271	217531	223179	225261	184946	164447	177633	369	369	369	1
XP_755141.1	Aspergillus fumigatus Af293	involucrin repeat protein	22	0.142324	0.210622	0.904133	0.266203	0.396569	0.608375	0.0543405	0.377296	0.924774	0.458238	0.886718	1.37435	92018.3	98551.1	99132.5	94095.9	79420.2	88909.3	107087	101220	104867	96674	89873.9	29458.9	59	59	59	1
XP_755921.1	Aspergillus fumigatus Af293	TAM domain methyltransferase, putative	7	0.562841	0.697581	1.04524	0.340613	0.488298	0.807302	0.0547136	0.381149	0.738469	0.812732	0.976465	0.956123	64897.8	69708.8	58330.1	69197.1	61071.1	71308.4	100914	71829.6	90398.4	54350.2	97014.3	65386.2	60	60	60	1
XP_753369.1	Aspergillus fumigatus Af293	hydroxyacylglutathione hydrolase, putative	16	0.00265177	0.038673	0.846851	0.00169735	0.0508571	0.847298	0.0547239	0.380501	0.969823	0.376566	0.849942	0.969311	242691	249876	244036	211520	198534	214026	249746	254007	255747	205886	220624	217262	234	234	234	1
XP_747543.1	Aspergillus fumigatus Af293	tryptophanyl-tRNA synthetase, putative	14	0.22004	0.302687	0.983981	0.0360638	0.11309	1.08121	0.0548707	0.381161	1.05932	0.100487	0.716998	0.964066	235444	237785	232961	227298	233735	233880	229908	214101	222893	240929	245940	234032	225	225	225	1
XP_753283.1	Aspergillus fumigatus Af293	carboxylesterase, putative	6	0.640231	0.766443	1.03188	0.287739	0.421371	1.22831	0.0549264	0.380685	1.32076	0.515692	0.907783	1.10955	157196	133620	163364	155673	157911	153366	116681	130359	97915.4	186761	115934	127473	43	43	43	1
XP_755826.1	Aspergillus fumigatus Af293	alanine racemase	7	0.167144	0.239329	0.786468	0.0130523	0.0728987	0.381457	0.0551699	0.381586	0.793815	0.123474	0.708166	1.63665	50413.8	66799.3	60203.1	50227.5	36708.8	53489.9	70395.9	76740.6	75025.7	30825.1	39572.9	18442.3	39	39	39	1
XP_750407.1	Aspergillus fumigatus Af293	high expression lethality protein Hel10, putative	6	0.154021	0.224785	0.735443	0.00862545	0.0615771	0.561789	0.0552758	0.382383	0.8204	0.737904	0.955233	1.07399	1494908	1397044	1789430	1348445	831034	1326583	1884528	1892363	1897822	856545	1080283	1296863	295	295	295	1
XP_754233.1	Aspergillus fumigatus Af293	NADH-ubiquinone oxidoreductase B18 subunit, putative	6	0.516629	0.651401	0.972737	0.0542163	0.135629	1.27072	0.0553225	0.38158	1.2483	0.41852	0.866246	0.955578	1184110	1175302	1105674	1172052	1146326	1054143	1079368	886942	826315	1261446	1103849	1165674	111	111	111	1
XP_752252.1	Aspergillus fumigatus Af293	septin	28	0.840307	0.910595	1.00504	0.650195	0.783475	1.03114	0.0554026	0.381409	1.06149	0.618063	0.936599	1.03462	1087017	1149992	1103399	1128274	1144612	1084265	1021091	1051789	1073793	1207639	1069862	978600	954	954	954	1
XP_001481413.1	Aspergillus fumigatus Af293	carbonate dehydratase, putative	7	0.538914	0.674427	0.954746	0.00931839	0.0647588	0.724441	0.0554028	0.380611	0.881744	0.152704	0.734609	1.16206	106271	105002	118704	115415	105376	94785	118459	129402	126049	102424	84400.5	84979.3	81	81	81	1
XP_755742.1	Aspergillus fumigatus Af293	extragenic suppressor of the bimD6 mutation	20	0.00347158	0.0361825	0.842802	0.35051	0.499243	0.943679	0.0555583	0.38177	1.11109	0.878046	0.987694	0.992315	1018804	1052852	1040848	909232	832521	882983	924673	1001852	878636	823424	880070	943915	216	216	216	1
XP_748148.1	Aspergillus fumigatus Af293	R3H domain protein, putative	16	0.0669453	0.115277	0.925777	0.0274061	0.0989563	0.879339	0.0555599	0.380975	1.10386	0.00931493	0.709532	1.16216	230687	243903	241619	226021	227333	209932	229376	204892	215055	184868	188506	197199	239	239	239	1
XP_751625.1	Aspergillus fumigatus Af293	Vacuolar protein sorting-associated protein 26, putative	18	0.0282765	0.0655429	1.13772	0.338481	0.486479	1.07234	0.0557396	0.38247	0.918666	0.724446	0.952243	0.97467	155689	157241	153933	164151	183069	184670	179886	162051	166737	165463	180241	200968	226	226	226	1
XP_752927.1	Aspergillus fumigatus Af293	oxidoreductase, zinc-binding dehydrogenase family, putative	15	0.0111457	0.0452486	1.25822	0.172525	0.288043	1.21142	0.055756	0.381676	0.903946	0.629106	0.936598	0.938867	109432	99117.7	101530	126054	123270	141171	119097	109893	113918	110391	156906	153028	189	189	189	1
XP_750013.1	Aspergillus fumigatus Af293	rRNA processing protein Pwp1, putative	20	0.755762	0.85597	0.99258	0.116878	0.21543	1.0776	0.0557743	0.380886	1.0767	0.818252	0.976148	0.991756	162794	162833	160555	161873	154450	166471	142554	153985	155332	157384	158816	170699	233	233	233	1
XP_749605.1	Aspergillus fumigatus Af293	vacuolar sorting-associated protein (Vps27), putative	18	0.00345676	0.0368837	0.900401	0.256571	0.384351	0.91449	0.0559796	0.381058	1.02882	0.86064	0.983578	1.01297	95223.1	95069.5	92160.2	83538.2	87024.5	83773.7	91408.8	91511.2	91588.7	76702.9	79912.1	95590.9	118	118	118	1
XP_752459.1	Aspergillus fumigatus Af293	MAP kinase kinase kinase SskB, putative	12	0.121935	0.187398	0.967579	0.233574	0.359789	1.09082	0.0560274	0.380594	1.12758	0.996899	0.999189	1.00019	84019.6	81499	84949.4	78954.3	81794.7	81592.7	80146.5	69049.4	73317.2	88246.4	77032.2	77470.4	34	34	34	1
XP_753538.1	Aspergillus fumigatus Af293	DUF775 domain protein	6	0.230454	0.313026	1.38671	0.0159547	0.0784031	0.518092	0.0562194	0.381539	0.503936	0.0655738	0.667294	1.34882	10237.4	18413.1	21873.6	22018.5	23374	21363.7	37837.7	33338.1	25541.4	13344.2	16874.7	19897.5	11	11	11	1
XP_755092.1	Aspergillus fumigatus Af293	Ku70-binding protein, putative	12	0.100083	0.160028	1.10884	0.118435	0.217721	0.866242	0.056297	0.381207	0.805763	0.385681	0.852382	1.03142	55593	54785.1	48881.1	58534.1	56262.5	61630.6	69715.1	71368.9	57195.8	58968	56446.9	55572.7	112	112	112	1
XP_750641.1	Aspergillus fumigatus Af293	WD repeat protein	12	0.242159	0.327763	0.932433	0.0138409	0.0762409	0.752412	0.0563061	0.380426	0.816511	0.76964	0.964752	1.01187	34007.2	37283.1	31866.7	31845.4	33367.1	30825.3	38088.8	46999.1	41461.7	30081.2	33347.8	31516.5	43	43	43	1
XP_755940.1	Aspergillus fumigatus Af293	conserved hypothetical protein	3	0.22774	0.311119	1.12375	0.0476096	0.128925	3.92078	0.056554	0.381742	3.4479	0.942358	0.993612	0.988216	107839	98366.8	103285	116208	132295	101133	19810.5	17838.3	75639.9	101391	103904	152928	24	24	24	0.999
XP_751695.1	Aspergillus fumigatus Af293	saccharopine dehydrogenase Lys9, putative	34	0.0132698	0.0476223	1.09434	0.00778309	0.0613003	1.11739	0.0565806	0.381282	1.05704	0.203406	0.759895	1.03524	1154892	1139404	1161692	1256825	1308009	1218672	1134011	1073477	1063231	1198758	1240658	1214133	1389	1389	1389	1
XP_753934.1	Aspergillus fumigatus Af293	NAD binding Rossmann fold oxidoreductase, putative	22	0.113827	0.175959	1.09226	0.203774	0.325876	0.923577	0.0567613	0.382346	0.877071	0.480455	0.894405	1.03726	316589	300034	319834	352342	315334	356311	344475	335999	389038	323366	317109	345942	465	465	465	1
XP_754830.1	Aspergillus fumigatus Af293	t-complex protein 1, delta subunit, putative	33	0.195581	0.272585	0.972742	0.659327	0.789238	0.990232	0.0567675	0.381569	1.06304	0.0411775	0.713653	1.04426	775147	799617	764168	765019	769242	740819	710855	758430	731326	736076	727890	714544	1065	1065	1065	1
XP_746590.1	Aspergillus fumigatus Af293	histidinol-phosphatase	6	0.0163094	0.0499081	1.69882	0.573034	0.72143	0.858535	0.0569156	0.382101	0.665565	0.309304	0.80058	1.31698	30999.9	48175.5	42460.4	64841.7	69579.3	68909.9	69100.5	59405.3	52395.4	60180.5	69876.3	32366	45	45	45	1
XP_750388.2	Aspergillus fumigatus Af293	translation elongation factor EF-1 alpha subunit, putative	45	0.00409639	0.0362712	1.15142	0.143725	0.250769	1.14005	0.0572123	0.383425	1.05645	0.425583	0.868705	1.06699	21810120	23283320	22064990	25711860	26367440	25229360	21236550	20976090	21332790	27140370	24503200	21173330	6595	6580	6595	1
XP_751980.1	Aspergillus fumigatus Af293	conserved hypothetical protein	6	0.100471	0.160141	0.288811	0.0610915	0.144087	0.265199	0.0572263	0.382651	0.87152	0.949565	0.994978	0.949117	86078.9	75138.6	73116.7	14615.1	10956.7	71143.4	89773.4	91113.6	87339.9	21134.1	10373.9	60775.8	15	15	15	1
XP_754183.1	Aspergillus fumigatus Af293	NEDD8 conjugating enzyme (UbcL), putative	8	0.85795	0.919267	0.979906	0.34517	0.492787	0.838681	0.0572456	0.382274	0.842527	0.936315	0.992599	0.984399	65383.9	75598.8	79630.3	78364.3	60162.8	78554.6	83706.1	85855.9	91576.9	64618.2	59718.2	100610	63	63	63	1
XP_749110.1	Aspergillus fumigatus Af293	PCI domain protein	26	0.0667602	0.115104	1.04638	0.0436199	0.125076	1.06916	0.0575238	0.383493	1.04294	0.450733	0.881458	1.02071	1423024	1499122	1454548	1541393	1541809	1495879	1387416	1396588	1411630	1505573	1434022	1548358	609	609	609	1
XP_750888.1	Aspergillus fumigatus Af293	importin beta-4 subunit, putative	70	0.000384526	0.0278519	1.1178	0.240302	0.366628	1.04449	0.0575294	0.382723	0.968414	0.311262	0.803294	1.03638	769433	771020	792834	868893	865101	873933	791337	809810	808147	792114	879972	846627	1829	1829	1829	1
XP_755624.1	Aspergillus fumigatus Af293	conserved hypothetical protein	4	0.0259477	0.0634114	0.734027	0.0587275	0.14147	0.354648	0.0575425	0.381956	0.887372	0.205878	0.757799	1.83663	95764.9	98792.6	87172.9	80976.7	63582.8	63350.2	106737	109747	100760	42220.2	69410.1	17965.7	21	21	21	1
XP_747359.1	Aspergillus fumigatus Af293	acetyl-coA hydrolase Ach1, putative	15	0.465357	0.599249	0.938003	0.846033	0.913525	1.01852	0.0575932	0.3816	0.859572	0.088486	0.698837	0.791618	73525.4	62398.8	63105	57782.7	59252.9	69788.3	73731.4	77942.3	79324.2	66710.2	80760.6	89402.7	91	91	91	1
XP_753716.1	Aspergillus fumigatus Af293	transaldolase	32	0.0491006	0.0928021	1.12487	0.0379456	0.117442	1.25341	0.0577084	0.381317	1.05374	0.536883	0.911341	0.94567	5417143	5565424	5517022	6037798	6705566	5847441	5107796	5411087	5143514	7515990	6296900	5914899	1748	1748	1748	1
XP_754544.1	Aspergillus fumigatus Af293	acetate kinase, putative	13	0.481988	0.616338	0.935719	0.119673	0.219837	0.736453	0.0579419	0.381267	0.783308	0.976357	0.995638	0.995251	90251.4	76506.4	86513.7	90399.4	71806.3	75395.4	124937	95932.4	103701	61313.9	84083.3	96295.6	133	133	133	1
XP_748156.1	Aspergillus fumigatus Af293	ARP2/3 complex subunit Arc18, putative	12	0.00896397	0.0418048	1.28672	0.017178	0.0800743	1.23772	0.0580629	0.380899	0.840096	0.0220153	0.695	0.87336	685498	627497	602453	821896	873672	768830	810001	791671	681590	930551	941915	945505	184	184	184	1
XP_750585.2	Aspergillus fumigatus Af293	methionyl-tRNA formyltransferase family protein, putative	7	0.8717	0.928822	1.00153	0.0668493	0.149297	0.823893	0.0582398	0.381119	0.822578	0.997979	0.999163	0.999936	28451.1	28275.1	28297.7	28790	27939.8	28430.6	36006.1	38108.4	29807.5	28978.5	27152.4	29070.4	26	26	26	1
XP_751174.1	Aspergillus fumigatus Af293	hypothetical protein AFUA_6G12960	7	0.0166577	0.0505869	1.1827	0.00153874	0.0526809	1.4121	0.0582885	0.38061	1.14569	0.286967	0.793465	0.959567	262556	243655	237192	290864	309081	279231	234611	210261	204547	304388	297126	314146	155	155	155	1
XP_750678.1	Aspergillus fumigatus Af293	mitochondrial	9	0.924932	0.960684	1.00687	0.0781296	0.163577	0.754565	0.058385	0.380095	0.845518	0.378649	0.851006	1.12823	38865.3	47867.4	44022.4	41052.3	45080.7	45171.7	51425.5	49544.5	53178.2	44643	42514.4	30669.6	59	59	59	1
XP_751294.1	Aspergillus fumigatus Af293	acetyl-CoA-acetyltransferase, putative	15	0.505338	0.639451	1.03921	0.209506	0.333112	0.916717	0.0584716	0.379495	0.882932	0.989072	0.997687	1.00091	171644	179522	173696	181684	166492	198581	180891	207023	207644	173475	195119	176980	211	211	223	1
XP_753581.1	Aspergillus fumigatus Af293	voltage-gated chloride channel, putative	4	0.0563355	0.103003	4.07344	0.105987	0.196971	0.185484	0.0587499	0.380976	0.252542	0.102415	0.712598	5.54612	143556	27170.2	33629.1	224340	179482	220185	184871	217756	202296	187108	14968.1	18556	12	12	12	0.9965
XP_747876.1	Aspergillus fumigatus Af293	conserved hypothetical protein	2	0.254917	0.343858	1.0946	0.278813	0.411069	0.833107	0.0590321	0.382978	0.824558	0.605565	0.934208	1.08336	130617	131273	114272	150520	126522	134933	148856	169211	138758	131756	155713	98505	45	45	45	1
XP_752235.1	Aspergillus fumigatus Af293	conserved hypothetical protein	5	0.00556847	0.0398873	1.9491	0.0478171	0.129027	0.2971	0.0590639	0.382227	0.576723	0.028073	0.722844	3.78354	37810.2	44940	33709.1	65627.3	72529	89103.1	82393.7	79743.7	45446.1	40053.8	18371	10641.9	32	32	32	1
XP_748557.2	Aspergillus fumigatus Af293	CBF/NF-Y family transcription factor, putative	4	0.0328283	0.0718964	0.578568	0.198534	0.320252	0.652896	0.0591479	0.382693	1.222	0.813619	0.976926	1.08288	106287	100381	97502.1	70603.3	41835.4	68208.4	82785.2	73206.1	94065.7	31832.8	66897.9	74503.6	33	33	33	1
XP_751606.1	Aspergillus fumigatus Af293	exosome complex exonuclease exoribonuclease (Rrp44), putative	42	0.592487	0.725	0.983894	0.161367	0.273642	1.03512	0.0592107	0.382188	1.08035	0.207184	0.755838	1.02689	91813.1	91060.1	97806.1	90956.7	95045.3	90090.3	86338.1	89575.4	83851.4	88484.2	90021.6	90294.3	285	285	330	1
XP_753494.1	Aspergillus fumigatus Af293	Arp2/3 complex subunit (Arp3), putative	22	0.258384	0.346859	1.06219	0.0117766	0.0696449	0.906063	0.0593421	0.382105	0.896375	0.164211	0.756082	1.05083	635508	655865	718944	675908	741506	716528	765512	756794	718178	691317	668929	669236	550	550	550	1
XP_754910.1	Aspergillus fumigatus Af293	60S ribosomal protein L21, putative	13	0.731306	0.836181	0.970884	0.000499822	0.0476923	1.47147	0.0593501	0.381362	1.24391	0.00249584	0.586667	0.820734	1958772	2508385	2378678	2293677	2233746	2087614	1789889	1957967	1732686	2700505	2712556	2641098	425	425	425	1
XP_754351.1	Aspergillus fumigatus Af293	DUF250 domain membrane protein	4	0.00708564	0.0397157	1.14283	0.44771	0.604853	1.02748	0.0593977	0.381305	0.948201	0.21624	0.752898	1.05465	149858	142873	145308	166261	160820	173676	153642	158119	150219	165426	159557	149977	60	60	60	1
XP_750934.1	Aspergillus fumigatus Af293	ceramide synthase membrane component (LAG1), putative	5	0.00732939	0.0402222	1.19861	0.049704	0.130913	1.39968	0.0594174	0.380566	1.21205	0.734434	0.954644	1.03793	153957	157480	146610	172632	189464	187146	144288	121473	113900	145152	199092	189428	37	37	37	1
XP_752348.1	Aspergillus fumigatus Af293	PUA RNA binding domain protein, putative	9	0.00406124	0.0357143	0.743822	0.000182991	0.0612	0.677557	0.0594641	0.380209	0.913095	0.961146	0.993895	1.0024	351676	320408	342218	272813	238483	243912	355361	373290	381843	257917	253300	241169	269	269	269	1
XP_752481.1	Aspergillus fumigatus Af293	Sas10/Utp3 family protein	16	0.0117321	0.0460036	0.900167	0.65723	0.788468	0.968271	0.0596536	0.381282	1.11425	0.577531	0.922402	1.03588	103946	112132	105236	95592.6	96367.4	97121.9	93570.9	92161	102818	83994.4	93319	102690	124	124	124	1
XP_749485.1	Aspergillus fumigatus Af293	sugar transporter, putative	13	0.0382096	0.0789722	1.12958	0.390372	0.544093	1.07212	0.0597135	0.380547	0.88535	0.365492	0.838657	0.932799	168828	165664	160907	176986	182739	200554	203854	177634	179084	178615	214616	208477	212	212	212	1
XP_750882.1	Aspergillus fumigatus Af293	bZIP transcription factor AP-1/Yap1, putative	13	0.396965	0.517851	0.938314	0.634819	0.768455	1.02877	0.0597585	0.379815	1.17932	0.288705	0.7956	1.07563	156645	187105	161183	146539	167155	159328	148216	145221	133814	141876	160125	138042	83	83	83	1
XP_753900.1	Aspergillus fumigatus Af293	DnaJ domain protein Psi, putative	22	0.0587092	0.105746	1.1111	0.0561442	0.138314	1.05985	0.0601522	0.380553	0.933198	0.587501	0.9297	0.978332	212975	202106	215324	242166	217571	241297	217921	225620	231954	236885	244320	234591	337	337	337	1
XP_747565.1	Aspergillus fumigatus Af293	glycogen synthase kinase (Skp1), putative	26	0.0989374	0.158402	0.91144	0.000540955	0.0516	0.826958	0.060233	0.380291	0.918276	0.741171	0.957075	1.01209	503785	558118	514484	490395	450733	495521	560356	575862	578950	461905	487313	469368	592	592	592	1
XP_750430.1	Aspergillus fumigatus Af293	aconitate hydratase, mitochondrial	31	5.5726e-05	0.0271111	0.625671	5.98493e-05	0.1728	0.664135	0.0603361	0.379832	1.06032	0.969268	0.995072	0.998914	757205	791205	733217	473865	487916	465343	721827	718618	710376	456796	493799	478538	632	632	677	1
XP_753690.1	Aspergillus fumigatus Af293	mitochondrial ribosomal protein, putative	8	0.159974	0.232434	1.09094	0.0107958	0.0684653	1.33656	0.06045	0.379374	1.19408	0.598759	0.934193	0.974648	263613	258286	234307	270413	293658	260849	200997	197053	236581	293234	285928	266835	126	126	126	1
XP_752067.2	Aspergillus fumigatus Af293	translation initiation factor EF-2 gamma subunit, putative	33	0.078017	0.129499	1.05142	0.00431125	0.0566481	1.05945	0.0604752	0.378651	1.02496	0.471527	0.889964	1.0172	932130	918034	908476	971768	997881	931837	901806	886626	902981	937899	949506	964084	836	836	836	1
XP_755691.1	Aspergillus fumigatus Af293	conserved hypothetical protein	11	0.00379961	0.0355649	0.729078	0.226022	0.352409	0.857755	0.0606358	0.379703	1.07804	0.492551	0.900016	0.916317	78002.6	83429.6	83173.1	63861.2	54318.6	60471.2	73669.6	78448.3	74754.1	52532.1	70974.4	73125.7	62	62	62	1
XP_755922.1	Aspergillus fumigatus Af293	importin beta-5 subunit, putative	41	0.00665922	0.0391919	1.25235	0.279494	0.411932	0.924614	0.0606527	0.378983	0.883486	0.0392906	0.714857	1.19665	304728	316354	296773	354139	395714	400993	375896	341402	323279	308946	349743	303503	585	585	585	1
XP_752300.1	Aspergillus fumigatus Af293	eukaryotic translation initiation factor 3 subunit EifCf, putative	16	0.705326	0.819343	1.01403	0.0661286	0.148367	1.23164	0.0607374	0.379265	1.10848	0.319828	0.808107	0.912629	908953	853388	877945	862215	945217	871295	839426	743484	801164	901591	912167	1135913	368	368	368	1
XP_750260.1	Aspergillus fumigatus Af293	mRNA export factor mex67	15	0.0151341	0.0492668	1.17498	0.555271	0.706101	0.931416	0.0607563	0.378548	0.867409	0.434247	0.878549	1.09423	72431.3	79915.8	74200.5	85533.2	93302.5	87302.2	92007.9	90140.8	79350.2	82346.7	95558.7	67578.5	103	103	103	1
XP_747905.1	Aspergillus fumigatus Af293	conserved hypothetical protein	6	0.737412	0.842111	1.01769	0.151031	0.260791	0.848897	0.06123	0.380679	0.837891	0.957373	0.993747	1.0045	64875.9	69972.2	70758.3	72702.2	64280.2	72445.6	72273.3	84996.8	88888	61444.6	69997.3	77664.6	33	33	33	1
XP_747200.1	Aspergillus fumigatus Af293	Hsp70 chaperone (HscA), putative	49	0.0112308	0.045603	0.929722	0.451534	0.609086	0.978937	0.0612839	0.380105	1.0566	0.879902	0.987809	1.00348	4467582	4613775	4601159	4273942	4312134	4135563	4239226	4480316	4233217	4331263	4262538	4085524	3711	3711	3711	1
XP_750312.1	Aspergillus fumigatus Af293	40S ribosomal protein S3, putative	31	0.327931	0.430123	1.03939	0.0481491	0.128703	1.17735	0.0613621	0.38006	1.07933	0.471505	0.890363	0.95286	6044483	6347208	6359412	6497445	6845336	6159747	5571689	6059308	5747610	7466086	6222189	6816734	2130	2130	2130	1
XP_752480.2	Aspergillus fumigatus Af293	3-ketosphinganine reductase (Tsc10), putative	12	0.716472	0.825109	1.01163	0.186413	0.309326	0.913119	0.0621558	0.382927	0.897305	0.908929	0.990718	0.994108	131028	131116	127678	134648	135765	124226	133424	152309	149402	127587	126658	143040	184	184	184	1
XP_751719.1	Aspergillus fumigatus Af293	conserved hypothetical protein	2	0.374726	0.489466	1.13144	0.131602	0.235073	1.19664	0.0621968	0.382472	1.41846	0.018085	0.722	1.34117	58968.6	86241.9	76762.4	88776.3	74794.8	85154.9	54553.7	44253.5	56658.1	55757.6	67597.8	62185.6	39	39	39	1
XP_748008.1	Aspergillus fumigatus Af293	glutamine dependent NAD+ synthetase, putative	19	0.641664	0.768023	1.03171	0.51488	0.671372	0.962047	0.0622488	0.381899	0.880526	0.433274	0.877832	0.944287	137827	143184	127107	137163	129944	154554	149609	148415	165476	136980	151934	157198	189	189	189	1
XP_748166.1	Aspergillus fumigatus Af293	nucleolar RNA methyltransferase (Nop2), putative	25	0.500842	0.636611	1.07554	0.0800599	0.166622	1.3891	0.0622534	0.381187	1.33103	0.829353	0.978118	1.03058	232562	324182	267891	303476	293538	282086	209793	222169	183760	219628	328557	318147	271	271	271	1
XP_754821.1	Aspergillus fumigatus Af293	glutathione S-transferase, putative	6	0.256812	0.34529	1.06847	0.0151867	0.077328	1.72643	0.0623031	0.381378	1.29578	0.0951009	0.710449	0.801951	44230.1	38710.9	37768.7	42701.8	43732.2	42240.3	25961.3	33857.4	33814.8	47180.7	49648.4	65292.3	32	32	32	1
XP_754032.1	Aspergillus fumigatus Af293	SET and WW domain protein	8	0.0806013	0.133846	1.06528	0.0224394	0.0892911	0.869466	0.0625102	0.382416	0.894934	0.00823732	0.651644	1.09648	39195.7	39455.1	42196.6	44016.4	42619.8	42051.6	47606	45495.1	42035.9	38103.8	39753.4	39505.9	41	41	41	1
XP_755187.1	Aspergillus fumigatus Af293	DNA directed RNA polymerase II 15 kDa subunit, putative	4	0.250029	0.33598	0.809111	0.900156	0.942768	0.946927	0.0625221	0.381707	1.61712	0.459182	0.886774	1.38176	85622.4	71060.7	73505.4	56187.8	82552.9	51072.3	41567.2	37797.4	67313.2	70007.6	59295.3	21632	33	33	33	1
XP_746929.1	Aspergillus fumigatus Af293	vacuolar protein sorting protein, putative	49	0.444566	0.574968	1.01755	0.131225	0.234742	0.92761	0.0625441	0.381215	0.919665	0.787084	0.968701	1.00883	709185	744225	714041	748658	741603	715156	810540	806485	741187	768467	703647	715180	444	444	444	1
XP_748168.1	Aspergillus fumigatus Af293	deoxyhypusine synthase, putative	7	0.305917	0.404053	1.04979	0.373089	0.52541	0.963651	0.062899	0.381878	0.934847	0.72776	0.954532	1.01842	70793.7	74243	75862.9	76470.4	82619.2	73016	77077.3	77824.5	81361	79544.1	77110.4	71202.8	81	81	81	1
XP_747328.1	Aspergillus fumigatus Af293	nucleic acid-binding protein	14	0.0871532	0.143636	0.886369	0.366694	0.519564	0.913582	0.062961	0.38169	1.03377	0.978329	0.99534	1.00298	214437	208242	205814	200249	190216	168023	204432	201546	201904	184184	216408	159142	212	212	212	1
XP_755959.1	Aspergillus fumigatus Af293	C2H2 finger domain protein, putative	5	0.026543	0.0631634	1.16214	0.458436	0.61667	0.878934	0.062963	0.380987	0.861962	0.440151	0.87908	1.1397	31874.4	35601.8	31567.8	38303.3	39716.6	36959.5	35463.2	38256.5	41229.7	39590.4	38612.5	24845.3	24	24	24	1
XP_749690.1	Aspergillus fumigatus Af293	RNA binding protein Jsn1, putative	20	0.56514	0.699587	0.981793	0.0331983	0.109367	0.896009	0.0630134	0.381088	0.926376	0.681907	0.938095	1.01507	198134	203725	197256	207020	189395	192181	223927	219233	204014	185794	195637	198210	262	262	262	1
XP_751216.1	Aspergillus fumigatus Af293	arsenate reductase (Arc2), putative	4	0.0247241	0.0624916	0.925547	0.0424279	0.124102	1.54976	0.0630691	0.380903	1.44155	0.0329774	0.729554	0.860921	97042.8	95667.2	93241.4	87047.4	91526.1	86145	58700.7	56038.4	87845.6	95819.3	110994	101132	65	65	65	1
XP_750004.1	Aspergillus fumigatus Af293	EF hand domain protein	44	0.726048	0.833018	0.978579	0.70123	0.820349	1.02664	0.0632061	0.381582	1.17094	0.139296	0.721849	1.11612	532019	599034	622213	537927	603086	572801	539479	477504	479472	463940	527292	546332	586	586	586	1
XP_752234.2	Aspergillus fumigatus Af293	conserved hypothetical protein	4	0.283872	0.377472	1.16582	0.897105	0.942217	1.02694	0.0632128	0.380885	0.707963	0.303465	0.792915	0.803708	126558	148428	104862	151267	127067	162383	150180	179946	205417	129838	224814	205965	44	44	44	1
XP_746564.1	Aspergillus fumigatus Af293	chlorohydrolase family protein	8	0.305504	0.403282	1.08314	0.308111	0.445336	0.820578	0.063296	0.380949	0.840485	0.573098	0.920664	1.10942	57828	52907.8	65301.4	59619.4	65273.1	65240.5	72900.7	70245.8	65711	61873.1	72546.3	41422.1	38	38	38	1
XP_755309.1	Aspergillus fumigatus Af293	conserved hypothetical protein	8	0.00991095	0.0420768	0.862585	0.144658	0.25213	1.22482	0.0632994	0.380393	1.28992	0.185749	0.760518	0.908435	186197	168542	176937	150094	151173	157062	165390	129821	120492	162829	154999	188350	108	108	108	1
XP_747037.1	Aspergillus fumigatus Af293	conserved hypothetical protein	2	0.562734	0.697629	0.927011	0.0205793	0.0857977	1.72391	0.0638551	0.382393	1.48608	0.106543	0.709169	0.799121	134340	130357	99420.6	128633	101303	106438	100269	65484.7	80795.5	125959	132118	163322	43	43	43	1
XP_754573.1	Aspergillus fumigatus Af293	nuclear transport factor NTF-2, putative	5	0.0128396	0.0478141	1.2641	0.0030879	0.0573171	1.57543	0.0640989	0.382846	1.13321	0.273996	0.783293	0.909273	866977	769843	880666	1044018	1130770	1005737	776976	723331	718687	1233046	1256184	1019649	300	300	300	1
XP_001481451.1	Aspergillus fumigatus Af293	MFS sugar transporter, putative	4	0.180318	0.254774	1.96087	0.146093	0.253871	0.500786	0.0641401	0.382377	0.355351	0.447045	0.880038	1.39141	7349.09	24504.2	14028	16970.9	34062	32949.2	34109	28516.2	57881.1	33431.6	11039.1	19158.5	10	10	10	1
XP_747972.1	Aspergillus fumigatus Af293	chromatin assembly factor 1 subunit A, putative	4	0.069454	0.119516	0.647626	0.165185	0.279222	0.797244	0.0642421	0.382539	1.28282	0.845497	0.983389	1.04208	28799.1	36370.8	35636.6	26055.2	15745.8	24713.8	27757.5	27780.2	22930.3	17587.5	19552.6	26055	13	13	13	1
XP_753386.1	Aspergillus fumigatus Af293	nuclear pore complex subunit Nup192, putative	36	0.354167	0.461529	1.02018	0.182906	0.304677	1.04204	0.0642833	0.381986	1.04402	0.463549	0.885507	1.02212	268216	254069	256014	266082	260068	267690	248431	249000	247840	262182	268490	246429	384	384	384	1
XP_751506.1	Aspergillus fumigatus Af293	calponin homology domain protein	9	0.0310171	0.0688475	0.860085	0.863099	0.923762	0.982876	0.0645865	0.383272	1.18467	0.67776	0.937901	1.03667	67304.8	67819.5	59152.1	56379.9	54175.7	56242.7	54674.2	49967	59443.9	55930.7	45980.5	59957.8	45	45	45	1
XP_752679.1	Aspergillus fumigatus Af293	anthranilate synthase multifunctional protein TrpC, putative	41	0.0487028	0.0922476	0.916091	0.0410937	0.122418	0.895213	0.0646426	0.382583	1.05041	0.180585	0.765769	1.0749	484296	504780	480672	473822	434979	438322	462249	477573	459277	428801	435776	389270	843	843	843	1
XP_749098.1	Aspergillus fumigatus Af293	conserved hypothetical protein	4	0.0866104	0.142689	0.924303	0.010449	0.0670359	0.789412	0.0648073	0.382815	0.891174	0.377598	0.850141	1.04345	55092.6	60497.4	60219.8	55959.8	53414.9	53024	62904.8	70238.5	64183.2	54940.9	48093.5	52797.1	35	35	35	1
XP_753579.1	Aspergillus fumigatus Af293	pyridoxamine phosphate oxidase, putative	16	0.718354	0.827373	0.974996	0.0406209	0.121577	1.28623	0.0649177	0.383369	1.18013	0.256646	0.780473	0.89457	349365	309218	345336	306081	361672	312351	293670	255166	302907	390376	319264	387543	166	166	166	1
XP_753988.1	Aspergillus fumigatus Af293	vacuolar protein sorting protein DigA	21	0.406198	0.529556	0.981198	0.472142	0.630882	0.98532	0.0649178	0.382683	0.946246	0.0248725	0.707669	0.942288	70266.8	66585.9	66629.6	65231.4	66964.3	67417	72479.5	72660.2	69867.5	72440.4	69132.8	70283.7	88	88	88	1
XP_753155.1	Aspergillus fumigatus Af293	arsenic methyltransferase Cyt19, putative	5	0.656578	0.782188	1.07579	0.470328	0.628959	1.17287	0.0651821	0.382907	1.54232	0.132145	0.718911	1.41466	30940.9	34146	44299.7	38028.7	32469	47193.2	23010	18665.5	29702.6	29384.6	33979.8	20614	26	20	26	1
XP_755038.1	Aspergillus fumigatus Af293	phospholipase D1 (PLD1), putative	18	0.608791	0.737845	0.96534	0.456283	0.614057	0.877826	0.0652254	0.38236	0.843387	0.655598	0.938224	0.927467	444485	440987	391169	422894	373022	437242	550871	506647	457944	370048	393122	594302	56	56	56	1
XP_753792.1	Aspergillus fumigatus Af293	conserved hypothetical protein	14	0.135666	0.20271	1.11249	0.00232747	0.0578209	1.08218	0.0652307	0.38168	0.9324	0.455084	0.884006	0.958516	65165.4	62336.1	59456.4	66175.8	76659	65551.4	65776.1	67692.3	66917.9	72212.7	71336.7	73302.8	88	88	88	1
XP_001481719.1	Aspergillus fumigatus Af293	conserved hypothetical protein	4	0.375969	0.490806	1.77895	0.133994	0.237857	3.72505	0.0653281	0.381343	4.52912	0.322307	0.809168	2.16294	24518.7	138098	140272	139419	138124	138854	22651	17070.9	13221.2	128017	126275	16346.6	8	8	8	0.9994
XP_001481686.1	Aspergillus fumigatus Af293	conserved hypothetical protein	4	0.0560275	0.103063	0.648641	0.236989	0.362891	0.708978	0.0654108	0.381099	1.15415	0.860512	0.983709	1.05593	54165.1	56790.8	47745.3	27131.9	45783.5	32266.4	44591.6	44703.4	47923.4	45058.3	37751	20014.1	26	26	26	1
XP_746786.1	Aspergillus fumigatus Af293	ribosomal protein S5	22	0.335714	0.437653	1.03605	0.0623427	0.145191	1.16853	0.0656492	0.381104	1.10213	0.706002	0.941251	0.977181	7149567	7562948	7003428	7842663	7368525	7287581	6353009	6374109	6985331	8213775	7936212	6923839	1695	1695	1695	1
XP_752937.1	Aspergillus fumigatus Af293	anaphase-promoting complex component Cut20/Apc4, putative	2	0.864084	0.922714	1.0621	0.4247	0.580784	0.699338	0.065831	0.381279	2.19819	0.0441825	0.67705	3.33843	90170.9	39052	53088.4	48822.2	94669.3	48459.4	38196	20034.7	22999.4	12194.5	13461	36672.1	6	6	6	0.98
XP_755253.1	Aspergillus fumigatus Af293	conserved hypothetical protein	17	0.0109892	0.0442344	0.861691	0.0101949	0.0666286	0.778016	0.065978	0.381686	0.911903	0.85933	0.984532	1.00998	95191.2	104228	96240.9	82035.9	86525.2	86069.4	104434	112870	106826	88678.5	76069.2	87908.9	115	115	115	1
XP_753396.1	Aspergillus fumigatus Af293	U6 small nuclear ribonucleoprotein (Lsm3), putative	3	0.440265	0.569818	1.66356	0.167623	0.28267	0.479882	0.0660665	0.381655	0.449833	0.54076	0.914137	1.5594	20704.1	20301	52502	72460.1	82318.3	17032.2	58574.6	69583.5	59481.1	16629	69595.6	23149.9	22	22	22	1
XP_750343.1	Aspergillus fumigatus Af293	serine/threonine protein kinase, putative	28	0.00144292	0.03824	0.82734	0.0284537	0.100609	0.867587	0.0662379	0.381722	1.08805	0.355264	0.833077	1.03758	76955.8	73451.2	72781.7	61631.7	59700.4	63319	71178.6	64635.9	69420.7	57031.9	58009.3	63042.7	126	126	126	1
XP_752074.1	Aspergillus fumigatus Af293	proteasome component Pre1, putative	7	0.0322404	0.0708649	1.18582	0.236074	0.361907	1.06542	0.0664471	0.382765	0.862301	0.329244	0.81043	0.959746	270540	248900	230182	310180	292192	285171	271230	307646	289709	324559	304392	295933	162	162	162	1
XP_753952.1	Aspergillus fumigatus Af293	conserved hypothetical protein	13	0.00021984	0.0125128	1.14818	0.899815	0.942486	1.00682	0.0665154	0.382494	0.889091	0.562228	0.918161	1.01392	50495.2	50129.6	51751.1	57947.2	58101.4	58893.9	52143.4	60382.2	59199.3	57164.6	55615.6	59834.6	75	75	75	1
XP_748105.1	Aspergillus fumigatus Af293	vacuolar ATP synthase catalytic subunit A, putative	40	0.0110994	0.0451353	1.1331	0.0165472	0.0790951	1.11356	0.0672247	0.385455	0.936136	0.164162	0.756592	0.95256	603090	615260	580470	674626	707867	656163	637262	664577	619927	737555	693463	708814	1034	1034	1034	1
XP_754527.1	Aspergillus fumigatus Af293	telomere and ribosome associated protein Stm1, putative	22	0.00257427	0.0388406	0.83679	0.872951	0.92874	0.989658	0.0674706	0.385473	1.09085	0.226739	0.760147	0.922354	1682104	1818526	1819315	1472120	1497767	1478914	1579510	1701187	1595545	1446920	1636666	1754824	1092	1092	1092	1
XP_752768.1	Aspergillus fumigatus Af293	conserved hypothetical protein	10	0.746156	0.850088	0.985151	0.103139	0.192612	0.851652	0.0676341	0.385261	0.913777	0.525441	0.908231	1.05701	43087.6	46186.1	40845	42775.3	40864	44460.8	48063.9	47120.6	47038.3	38249.9	46908.2	36676.6	52	52	52	1
XP_752147.2	Aspergillus fumigatus Af293	ubiquinol-cytochrome c reductase complex 14 kDa protein	7	0.499305	0.634826	1.04512	0.131153	0.234885	1.24221	0.0677137	0.385183	1.19907	0.938167	0.993019	1.00882	3255606	3163069	3547224	3551884	3716949	3158502	2656180	2540999	3139306	4146825	3059994	3200693	312	312	312	1
XP_750200.1	Aspergillus fumigatus Af293	conserved hypothetical protein	15	0.0201886	0.0561503	1.12335	0.846169	0.913431	1.00718	0.0681892	0.387417	0.937986	0.308424	0.799518	1.04618	104856	103373	98785.2	109323	118786	116887	106999	113183	107137	107109	116441	106291	115	115	115	1
XP_750795.1	Aspergillus fumigatus Af293	3'(2'),5'-bisphosphate nucleotidase	15	0.0144994	0.0489045	0.936017	0.0184371	0.0813835	0.732608	0.06828	0.386946	0.904046	0.115261	0.703211	1.15506	454164	466954	460884	437208	419379	437154	479534	502175	549327	402718	398333	324244	266	266	266	1
XP_753932.1	Aspergillus fumigatus Af293	ribosome biogenesis ABC transporter Arb1, putative	32	0.0630038	0.111692	0.955609	0.960181	0.976619	1.00165	0.0684235	0.387114	0.977324	0.112817	0.708286	0.9324	642538	625787	629280	616330	611640	585734	641806	652061	647682	667239	669647	609643	772	772	772	1
XP_752292.1	Aspergillus fumigatus Af293	CUE domain protein, putative	19	0.00374252	0.0353922	0.831478	0.472992	0.63197	0.952413	0.068829	0.388428	1.10657	0.56533	0.917433	0.966056	207458	193274	210962	165347	169214	173792	173406	192259	187252	182187	157855	187533	210	210	210	1
XP_751684.1	Aspergillus fumigatus Af293	aminotransferase, classes I and II, putative	10	0.98436	0.993213	0.999073	0.0324275	0.107907	0.724069	0.0690252	0.389014	0.870721	0.1239	0.706379	1.20142	90389.8	97691.9	101545	97597.5	91243.9	100412	102462	110932	119503	93052.8	81280.6	68174.5	87	87	87	1
XP_752676.1	Aspergillus fumigatus Af293	regulator of nonsense transcripts, putative	43	0.00346516	0.0366	0.868306	0.00270624	0.0598919	0.803946	0.0690373	0.388344	0.956167	0.418963	0.866423	1.03271	169437	171748	163479	149496	147603	141143	174176	173899	179670	143482	147967	133193	409	409	409	1
XP_753024.2	Aspergillus fumigatus Af293	MIND kinetochore complex component Mtw1, putative	4	0.841662	0.911113	0.923906	0.0797753	0.166622	0.546365	0.0695027	0.389649	0.415508	0.274226	0.783148	0.702627	17335.2	11318.8	37386.1	15219.7	16559.6	22954.3	45519.9	53434.7	42041.2	15617.8	34905.4	30594.1	9	9	9	1
XP_754820.1	Aspergillus fumigatus Af293	phosphoinositide-specific phospholipase C, putative	9	0.713966	0.823708	0.978154	0.294719	0.429641	1.14061	0.0696127	0.389393	1.17394	0.951674	0.994151	1.00673	38508.1	42683.6	37032.7	40838.9	35974	38775.6	31481.8	36951.2	32342.7	44508.8	31887.6	39337.7	35	35	35	1
XP_749040.1	Aspergillus fumigatus Af293	conserved hypothetical portein	18	0.0439295	0.0853886	0.817802	0.497713	0.654285	1.04845	0.0696345	0.388726	1.19811	0.312364	0.804913	0.934536	74973.6	95035.1	84919.1	67924	69203.6	70402.9	69165.1	74414.4	68354.1	77494.2	65998.1	79278.2	189	189	189	1
XP_749377.1	Aspergillus fumigatus Af293	cytoplasm to vacuole targeting Vps64, putative	11	0.00074285	0.0333647	0.74334	0.00937642	0.0643861	0.736589	0.0696419	0.388062	1.10369	0.14931	0.731539	1.11381	67522.7	67844.5	62626.4	50796.3	47709.1	48624.1	57312.1	58702.8	63426.9	47333.1	45860.2	39287.5	80	80	80	1
XP_755051.1	Aspergillus fumigatus Af293	nuclear envelope pore membrane protein, putative	43	0.00973155	0.0412895	1.0899	0.00408625	0.0577005	1.19057	0.0699	0.389311	1.03649	0.172245	0.766066	0.948846	126855	126190	123759	132898	140940	136935	124014	118809	120752	151736	138566	142803	405	405	405	1
XP_747799.1	Aspergillus fumigatus Af293	phospholipase, putative	11	0.0439972	0.0854987	0.949262	0.757304	0.854742	0.981826	0.069917	0.388647	1.07706	0.461657	0.886214	1.04134	201450	204094	202348	191832	186864	198524	182029	183142	199732	189359	168770	197195	240	240	240	1
XP_751972.1	Aspergillus fumigatus Af293	pantetheine-phosphate adenylyltransferase family protein	9	0.0200434	0.0563405	1.2366	0.875889	0.930238	0.986291	0.070351	0.390898	0.850327	0.44486	0.879311	1.06613	189634	217295	220604	248752	273913	252285	252477	260766	224568	252516	265773	211366	112	112	112	1
XP_755448.1	Aspergillus fumigatus Af293	secretory pathway gdp dissociation inhibitor	38	0.00967365	0.0414598	1.13649	0.944161	0.967637	0.995952	0.0703705	0.390234	0.925357	0.355394	0.833009	1.05594	1245588	1342737	1309708	1474730	1519209	1435196	1467423	1382567	1362606	1541841	1346039	1315920	1575	1575	1575	1
XP_753573.2	Aspergillus fumigatus Af293	conserved hypothetical protein	5	0.0390834	0.0796322	0.819155	0.564192	0.714234	0.966274	0.0705223	0.390556	1.09538	0.391645	0.852831	0.928606	246702	259606	246749	224900	181709	212557	235730	214459	237840	226701	203466	235180	60	60	60	1
XP_753576.1	Aspergillus fumigatus Af293	phosphomevalonate kinase	15	0.467771	0.601779	0.981843	0.0209038	0.0864262	0.890515	0.0708091	0.391025	0.928592	0.38685	0.853121	1.02383	198475	208594	212841	199049	203955	205445	218324	216870	232426	193651	207114	193768	176	176	176	1
XP_751873.1	Aspergillus fumigatus Af293	SNARE protein Ykt6, putative	10	0.368642	0.481977	0.979554	0.130551	0.233789	0.920653	0.0708277	0.390493	0.949537	0.824343	0.977408	1.01029	523122	542049	525432	521930	533350	503058	564939	538930	571595	539153	530189	475081	236	236	236	1
XP_754800.1	Aspergillus fumigatus Af293	fumarylacetoacetate hydrolase family protein	11	0.634489	0.76125	1.02473	0.00236046	0.0584412	1.2531	0.0712549	0.392863	1.11144	0.0670397	0.659377	0.908888	459934	454267	410316	466299	465696	424796	378295	405116	407430	518623	479991	493550	163	163	163	1
XP_755040.1	Aspergillus fumigatus Af293	conserved hypothetical protein	16	0.105689	0.166269	1.15713	0.418838	0.574191	0.91961	0.0713027	0.39233	0.870325	0.421892	0.869027	1.09511	161155	189242	160579	201186	180303	209167	200943	195526	189073	182256	208459	152061	194	194	194	1
XP_752440.1	Aspergillus fumigatus Af293	prolyl-tRNA synthetase	15	0.00621966	0.0391579	0.888914	0.0120216	0.0706821	0.773932	0.0713048	0.391671	0.924391	0.328979	0.809729	1.06173	80130.9	75199.2	80021	69387.5	70772.3	68968.8	84599	88622.9	81421.5	66956.4	71192.9	59364.9	115	115	115	1
XP_748356.1	Aspergillus fumigatus Af293	glycosyl hydrolase, putative	14	0.0259272	0.0634849	1.09286	0.104725	0.194583	1.06603	0.0714724	0.391772	0.937515	0.255325	0.781331	0.961104	237099	234344	247560	260738	253723	271387	255851	246495	264688	269918	263416	284425	223	177	223	1
XP_749598.1	Aspergillus fumigatus Af293	SH3 domain protein	16	0.0115789	0.0460949	0.90539	0.0203888	0.0852867	0.876791	0.0715089	0.391323	1.07012	0.0331791	0.718375	1.10503	153100	153842	160401	142164	144510	136484	141457	142901	152509	127163	122156	133773	208	208	208	1
XP_748417.1	Aspergillus fumigatus Af293	conserved hypothetical protein	8	0.071206	0.121269	1.17135	0.139827	0.244443	1.20207	0.0719304	0.392722	0.904536	0.322333	0.808736	0.881419	124326	126281	134650	151121	135144	166359	140610	134617	150909	141270	189426	185408	89	89	89	1
XP_751635.1	Aspergillus fumigatus Af293	iron-sulfur cluster assembly associated protein Nar1, putative	7	0.0893484	0.146842	1.22812	0.255065	0.383424	0.805014	0.0719488	0.392614	0.76618	0.363155	0.836918	1.16888	98019.7	131844	117206	132619	147934	143012	150776	168023	132933	121462	155594	92963.1	51	51	51	1
XP_754751.1	Aspergillus fumigatus Af293	eukaryotic translation initiation factor 3 subunit 2i, putative	21	0.091426	0.149154	1.06414	0.00278447	0.0586144	1.18396	0.0721116	0.393127	1.07065	0.209324	0.756578	0.962298	1164790	1168328	1091125	1197285	1256041	1189825	1084967	1029722	1082947	1252345	1225585	1308243	677	677	677	1
XP_752628.1	Aspergillus fumigatus Af293	hypothetical protein AFUA_1G12580	2	0.649579	0.774675	1.08793	0.0414861	0.122773	4.31572	0.0721998	0.394203	3.27695	0.359781	0.836023	0.826071	103692	75424.6	69471.8	76284	112744	81347.4	21446.6	11937.8	60308.4	110566	83261.6	134820	25	25	25	0.9991
XP_754448.1	Aspergillus fumigatus Af293	conserved hypothetical protein	3	0.0704843	0.12046	0.754425	0.511634	0.66832	0.776729	0.0723451	0.393711	0.738019	0.392489	0.853699	0.716827	20047.2	28786.7	22235.6	18332.9	18459.8	16281.2	34820.3	32681.4	28051.8	17069	17839.1	49127	5	5	5	1
XP_752045.1	Aspergillus fumigatus Af293	CaaX farnesyltransferase alpha subunit Ram2	6	0.282866	0.376751	0.940629	0.149457	0.258178	0.901384	0.072382	0.393291	0.901022	0.38449	0.853065	0.940251	39800.8	38292.7	40105.2	38618.6	39065.1	33719.4	40392.8	44795.4	46181.2	42506.6	39141.1	36782.7	60	60	60	1
XP_754523.1	Aspergillus fumigatus Af293	cell wall protein, putative	4	0.0650779	0.113234	1.18593	0.0464064	0.128353	2.05681	0.072399	0.392641	1.39863	0.388138	0.852017	0.806434	87145.8	73813.6	80504.2	89364.8	104531	92463.4	69284.2	61037.4	44757.3	178319	85305.4	108268	34	34	34	1
XP_748848.1	Aspergillus fumigatus Af293	cytochrome P450 monooxygenase, putative	4	0.748312	0.851379	0.957155	0.114264	0.209898	1.20971	0.072466	0.392396	1.37912	0.37258	0.843874	1.0912	42853.3	52622.1	66360.8	50404.9	49645.1	52439.9	39864.8	40292.8	35517.1	48696.5	39477.5	52535.7	27	27	27	1
XP_754365.1	Aspergillus fumigatus Af293	allantoicase Alc, putative	13	0.230717	0.313105	1.0474	0.198101	0.319518	0.924466	0.0726406	0.392283	0.899675	0.6726	0.937964	1.01931	136508	146009	143486	152670	141179	152462	148346	169458	156227	155839	140848	141364	183	183	183	1
XP_753068.1	Aspergillus fumigatus Af293	Sin3-associated polypeptide Sap18, putative	6	0.592757	0.725048	1.04193	0.00542078	0.055751	0.728383	0.0727278	0.392237	0.867466	0.036925	0.713877	1.24088	70623.8	64301.4	77190.8	67260.4	74591.4	79032	77200.1	83714.1	83092.6	61004.7	63555.7	53523	43	43	43	1
XP_752065.1	Aspergillus fumigatus Af293	conserved hypothetical protein	6	0.000327411	0.0270833	0.845661	0.898903	0.942791	0.983662	0.0728364	0.392525	1.18411	0.868134	0.986232	1.01799	122500	117793	121031	100051	102667	102823	115062	100820	90676.1	85630.1	96873	120692	104	104	104	1
XP_755854.1	Aspergillus fumigatus Af293	ribulose-phosphate 3-epimerase	7	0.023003	0.0605228	1.53511	0.467127	0.625715	0.839002	0.0731176	0.393954	0.68554	0.30782	0.798668	1.25433	177128	253601	177420	308220	308032	303672	338255	304211	240394	246337	340770	174037	213	213	213	1
XP_752483.1	Aspergillus fumigatus Af293	heat shock protein/chaperonin HSP78, putative	37	0.000525611	0.0329275	0.867931	0.0317447	0.106724	0.909301	0.0732104	0.394481	1.05398	0.815519	0.97571	1.00603	332822	332546	341219	288031	287950	297711	331218	313640	310492	277884	292044	298820	425	425	428	1
XP_751024.1	Aspergillus fumigatus Af293	meiotic recombination protein Mre11	6	0.776971	0.870026	1.0417	0.31261	0.45093	0.689508	0.0733267	0.395039	0.722845	0.798114	0.971342	1.09206	31861.6	28068.1	34129.9	30143.5	41347	27682.4	51818.7	45464	34302.7	36646.2	43646.8	16562.2	20	20	20	1
XP_756022.1	Aspergillus fumigatus Af293	sister chromatid cohesion and DNA repair protein (BimD), putative	41	0.0966479	0.155694	0.936536	0.450584	0.608249	1.02396	0.0733526	0.394584	1.0996	0.687662	0.937059	1.00572	222940	244067	227156	213481	222036	214197	208138	221687	201476	215725	216542	213656	370	370	370	1
XP_750958.1	Aspergillus fumigatus Af293	chaperonin, putative	9	0.840312	0.910352	1.00977	0.120096	0.220048	1.22647	0.0733851	0.394345	1.17582	0.739223	0.955746	0.968067	1553223	1413931	1554143	1431995	1601614	1532230	1437376	1237179	1180674	1592754	1346858	1805664	277	277	277	1
XP_753336.1	Aspergillus fumigatus Af293	agmatinase, putative	11	0.134167	0.199965	1.43779	0.691845	0.814519	0.948794	0.0735718	0.394446	0.715496	0.681096	0.93765	1.08425	127485	146995	194695	222904	170552	285250	209317	196514	242157	165375	220209	233617	86	86	86	1
XP_754066.1	Aspergillus fumigatus Af293	25S rRNA (adenine2142-N1)-methyltransferase	3	0.405881	0.529336	0.406077	0.0783764	0.164301	0.227448	0.0736359	0.394006	0.785381	0.783961	0.969487	1.40219	115771	155302	128530	151933	7773	131028	177954	176548	151834	131900	17148.6	24814.8	10	10	10	0.9991
XP_751557.1	Aspergillus fumigatus Af293	transcription factor, putative	19	0.492696	0.627838	0.978739	0.268009	0.399248	0.977276	0.0736708	0.393569	0.946615	0.0973483	0.709897	0.948032	195853	201146	188681	195819	194523	182956	208628	209180	200797	199072	199066	206394	183	183	183	1
XP_754924.1	Aspergillus fumigatus Af293	oxidoreductase, FAD-binding	30	0.224758	0.307688	1.06807	0.794017	0.880332	0.991596	0.0737053	0.393256	0.895379	0.297469	0.794018	0.964429	352376	356861	316230	347240	369285	377842	377251	367191	399912	385288	383434	365607	637	637	637	1
XP_747229.1	Aspergillus fumigatus Af293	rRNA maturation protein (Nop14), putative	22	0.360323	0.471354	0.949784	0.0036812	0.0604468	0.782294	0.0738523	0.393215	0.879439	0.139507	0.72236	1.06773	102434	107828	120381	107228	101819	104344	119315	126716	129296	101518	91717	100516	170	170	170	1
XP_748917.1	Aspergillus fumigatus Af293	metallopeptidase MepB	32	0.00138596	0.0381259	1.1057	0.159606	0.271718	1.05283	0.0739372	0.393084	0.932382	0.216033	0.752707	0.9792	557716	575824	552892	624290	617972	622153	587874	635434	586415	652497	628167	623714	626	626	626	1
XP_755832.1	Aspergillus fumigatus Af293	tubulin subunit TubB	30	0.925969	0.960367	1.0028	0.842285	0.911877	1.0221	0.0741185	0.393539	1.06535	0.69105	0.936923	1.04524	478767	512486	501458	479326	509736	507817	461860	456393	482735	567932	478882	399499	534	534	764	1
XP_748931.1	Aspergillus fumigatus Af293	vacuolar morphogenesis protein AvaB, putative	7	0.0190915	0.0549986	1.83062	0.29768	0.432981	0.536721	0.0744275	0.394347	0.671352	0.185006	0.762751	2.28981	26936.7	34242.3	23433	40609.1	56281.4	58014.9	52481.9	39461.4	34490.9	18796.8	57441.1	10228.8	23	23	23	1
XP_751758.1	Aspergillus fumigatus Af293	iron-sulfur cluster assembly accessory protein Isa1, putative	6	0.124068	0.188629	0.927938	0.123574	0.22528	1.12861	0.0744297	0.393714	1.16437	0.297317	0.794587	0.957338	141098	137148	144110	125457	126627	140262	136754	114419	112899	135719	135263	138339	71	71	71	1
XP_753593.1	Aspergillus fumigatus Af293	ABC transporter, putative	40	0.13959	0.205751	1.10176	0.407166	0.561047	0.963423	0.0746358	0.394654	0.886244	0.771212	0.966464	1.0135	227983	220415	245957	252856	238012	274655	241639	268988	273176	254993	253472	245660	634	620	634	1
XP_754585.1	Aspergillus fumigatus Af293	Rho	8	0.028889	0.0668119	1.12832	0.450127	0.607746	1.05261	0.0746505	0.394022	0.879048	0.271269	0.785564	0.942273	108730	100230	97001.9	113532	117854	113490	107778	115940	124546	132366	113372	120951	106	106	106	1
XP_753512.1	Aspergillus fumigatus Af293	Ser/Thr protein phosphatase	4	0.145764	0.214662	1.41982	0.829919	0.903883	0.934384	0.0748395	0.394914	0.440704	0.011688	0.71207	0.669662	12370.1	17922	9627.92	19778	15821.9	19523.3	16339.8	39891.2	38258.6	29805.2	24639.6	27701.5	19	19	19	1
XP_749748.1	Aspergillus fumigatus Af293	DNA polymerase epsilon subunit B, putative	9	0.560755	0.695822	0.965937	0.250036	0.379843	1.08766	0.0750239	0.395458	1.10595	0.814079	0.976797	0.982179	347186	339757	306298	298339	319983	341104	295070	292971	308970	346748	288244	343856	44	44	44	1
XP_748019.1	Aspergillus fumigatus Af293	pyruvate dehydrogenase kinase, putative	4	0.0670783	0.115175	0.311874	0.484221	0.642521	0.752624	0.0755121	0.396943	1.29486	0.347343	0.825981	0.536565	77184.9	72584.2	64677.8	19433.3	10738.1	52673.2	55390	46559.7	64717.7	61048.6	57338.7	20327	14	14	14	1
XP_747326.1	Aspergillus fumigatus Af293	2-hydroxyphytanoyl-CoA lyase, putative	4	0.365165	0.47757	0.95595	0.0175183	0.0801029	0.755743	0.0755708	0.396432	0.866597	0.195437	0.758808	1.09617	57498.1	53679.7	50557.8	49957.5	50580.3	53948	56549.7	65514	64719.4	48756.2	50304.5	42197.4	27	27	27	1
XP_754986.2	Aspergillus fumigatus Af293	anaphase-promoting complex subunit Apc5, putative	5	0.730453	0.835859	1.14691	0.536583	0.691804	0.873719	0.0757356	0.397105	0.57908	0.481266	0.895559	0.760148	8626.67	15986.2	13818.5	13063.6	8552.01	25734.5	16412.3	25114.5	23809	14379.8	24049.5	18927.5	20	20	20	1
XP_752364.1	Aspergillus fumigatus Af293	eukaryotic translation initiation factor 3 subunit EifCh, putative	21	0.11539	0.177427	0.91942	0.119714	0.219714	1.09606	0.0758612	0.396672	1.10832	0.182751	0.762398	0.929698	686262	626398	594768	582818	581650	586185	577889	560539	579757	601637	598243	687054	394	394	394	1
XP_754601.1	Aspergillus fumigatus Af293	HEC/Ndc80p family protein	16	0.0765144	0.127784	0.902551	0.535939	0.691481	0.972184	0.0760922	0.39712	1.11025	0.500456	0.902754	1.03072	47645.8	50516.6	44929	40754.1	44075.5	44262.1	41920.1	45378.4	41539.2	44265.8	41106.2	39902.3	91	91	91	1
XP_752729.1	Aspergillus fumigatus Af293	conserved hypothetical protein	18	0.045553	0.0871099	0.925445	0.10489	0.194907	0.963294	0.0761096	0.396493	1.04529	0.881456	0.987997	1.00422	259638	253849	244496	233815	225545	242193	238629	242874	243443	238556	234512	225436	170	170	170	1
XP_752583.1	Aspergillus fumigatus Af293	nucleoside diphosphatase	19	0.540463	0.675171	1.03642	0.0595721	0.141749	1.2266	0.0762016	0.396454	1.12795	0.581279	0.92577	0.953064	151925	146024	136209	145262	163116	141977	138021	120709	126388	149948	144222	179691	190	190	190	1
XP_753368.1	Aspergillus fumigatus Af293	cell morphogenesis protein Las1, putative	6	0.212447	0.293472	0.920491	0.00386008	0.0596082	0.676045	0.0762298	0.39583	0.891465	0.0523763	0.677907	1.2138	51397.1	56673.7	58340.4	52958.4	47004.1	53244.9	58646.8	64591.6	63322.2	45387.2	43559.6	37487.4	52	52	52	1
XP_754937.1	Aspergillus fumigatus Af293	Rho	5	0.607565	0.736934	0.983511	0.0621316	0.145246	0.888343	0.076402	0.396748	0.900878	0.940619	0.993121	0.997389	188888	187881	174831	174869	183703	183744	190884	205614	216215	190148	181640	172245	32	32	32	1
XP_750581.1	Aspergillus fumigatus Af293	negative regulator of DNA transposition (Rtt106), putative	6	0.000977003	0.0326786	0.764691	0.13014	0.233401	0.606501	0.0765506	0.396986	0.799019	0.977593	0.995855	1.00742	33210.4	33842.1	32764.3	25312.3	24238.7	26837.8	43552.7	47691.1	34754.3	15450.9	32573.1	31999.4	60	60	60	1
XP_749366.1	Aspergillus fumigatus Af293	actin cortical patch protein Sur7, putative	7	0.138286	0.205524	1.10812	0.748595	0.848883	1.0103	0.0766935	0.396947	0.877296	0.275087	0.78282	0.962238	153416	139697	127582	150577	155339	159061	163847	158540	155895	168636	154119	160676	101	101	101	1
XP_001481622.1	Aspergillus fumigatus Af293	DASH complex subunit Duo1, putative	7	0.0344816	0.0732177	0.730661	0.152064	0.261844	1.16166	0.0767679	0.396945	1.2677	0.054826	0.666058	0.797361	34305	35663.7	26907.6	21759.7	23131.2	25512.6	25851.4	23086	27075.3	27692.2	33787.4	27072.5	42	42	42	1
XP_747241.1	Aspergillus fumigatus Af293	cystathionine gamma-lyase	18	0.828542	0.900972	0.993772	0.0303737	0.105101	0.815387	0.0767747	0.396325	0.869858	0.157576	0.749864	1.06016	328442	355666	335471	343790	329346	339682	432306	382499	360073	299226	329727	327151	269	269	269	1
XP_751138.1	Aspergillus fumigatus Af293	WD repeat protein	6	0.304869	0.40227	1.06946	0.34193	0.489762	0.601426	0.0769995	0.397129	0.923044	0.354978	0.833108	1.64136	63296.3	70438.5	65888.2	78158.1	68601.5	67016.3	70572.3	73803.7	71716.1	62004.9	77075.3	17003.4	50	50	50	1
XP_747713.1	Aspergillus fumigatus Af293	aminotransferase, putative	10	0.00473761	0.037642	0.72395	0.0262062	0.099345	0.423877	0.0771527	0.397283	0.866838	0.189359	0.757514	1.4805	67273.7	73862.4	75504	56533.5	48467.8	51952.5	85844.5	88766.7	75589.6	50131.1	39691.4	22046.5	61	61	61	1
XP_755340.1	Aspergillus fumigatus Af293	carbamoyl-phosphate synthase, large subunit	74	0.290414	0.384708	0.976336	0.102665	0.19235	0.965984	0.0772921	0.396784	1.02777	0.171244	0.770418	1.03878	1239876	1277731	1265412	1232057	1268579	1193709	1227040	1242690	1210986	1191889	1211444	1152741	2802	2754	2802	1
XP_747993.1	Aspergillus fumigatus Af293	PQ loop repeat protein	4	0.0157179	0.0498602	1.23057	0.412059	0.566782	0.636218	0.0773543	0.396478	0.849635	0.369962	0.84056	1.64336	57549.9	67080.2	60706.6	72814	79412.2	75524.8	78132.5	74560.9	65589.5	71042	79997.1	17314.3	46	46	46	1
XP_753491.1	Aspergillus fumigatus Af293	glycerophosphocholine phosphodiesterase	14	0.209459	0.289487	1.0814	0.0679432	0.150971	0.901965	0.0774617	0.396521	0.891253	0.220937	0.759922	1.06856	59567.1	66155.2	56942.2	68002.7	62200.5	67088.3	68597.2	70346.4	65682.9	58233	60613.8	65891.4	102	102	102	1
XP_746711.1	Aspergillus fumigatus Af293	ribosomal small subunit assembly protein, putative	15	0.00232238	0.0353231	1.15834	0.572363	0.721807	1.03236	0.0775377	0.396279	0.943535	0.320946	0.807785	1.05868	171824	169879	160956	191608	196283	194152	182364	176406	173862	181734	200565	168832	153	153	153	1
XP_753142.2	Aspergillus fumigatus Af293	nicotinamide N-methyltransferase, putative	5	0.27402	0.366027	1.5773	0.0648566	0.147162	0.81766	0.0775581	0.395666	0.481678	0.732288	0.954769	0.929178	14749.5	36949.4	15008.5	40409.3	36661.7	21665.7	37489.2	42147.6	46320.5	31831	33298.3	37748.4	29	29	29	1
XP_754574.1	Aspergillus fumigatus Af293	conserved hypothetical protein	3	0.060325	0.108699	2.59691	0.00210162	0.05568	0.404181	0.0776976	0.396006	0.408679	0.000391782	0.635	2.62582	23985.1	46480.2	13217.5	57107.9	69375.5	65137.3	74231.4	56218.2	51730.4	23735	21863.6	27468	21	21	21	1
XP_747730.1	Aspergillus fumigatus Af293	ABC multidrug transporter, putative	8	0.966072	0.983104	1.00459	0.28875	0.422101	1.20612	0.0777762	0.395753	1.36223	0.382224	0.85261	1.13462	36197.8	41637.2	51005.4	42458	44204.7	41525.9	30629.3	36489.7	27209.3	48458.5	34218	32178.6	25	25	25	1
XP_755252.1	Aspergillus fumigatus Af293	Coatomer subunit zeta, putative	7	0.0493353	0.0933368	1.12285	0.0876136	0.177267	1.32044	0.0778984	0.395957	1.27887	0.343054	0.821876	1.08751	290374	301860	278853	328391	344565	305806	204652	205271	278172	344372	283049	276008	90	90	90	1
XP_752014.1	Aspergillus fumigatus Af293	protease inhibitor (Tfs1), putative	3	0.275993	0.3681	1.52646	0.438041	0.594711	0.744915	0.0783563	0.398286	0.613516	0.624208	0.936592	1.2572	19685	22534	14249.8	35504.2	41188.5	15373.9	37134.4	22156.1	33268.7	15082.3	18389.4	40793.6	7	7	7	0.9991
XP_747864.1	Aspergillus fumigatus Af293	Rab geranylgeranyl transferase escort protein, putative	9	0.789227	0.875086	0.982088	0.0645488	0.146814	0.810571	0.078388	0.398055	0.880544	0.508191	0.904601	1.06687	48836.4	47219.2	56200	47266.3	48975.8	53029.3	57635.1	56497.3	58294.9	54328.3	40969.6	45418.3	38	38	38	1
XP_747996.1	Aspergillus fumigatus Af293	methylenetetrahydrofolate reductase	29	0.000833745	0.0324536	1.1481	0.741417	0.844346	0.9817	0.0785578	0.398481	0.914062	0.159825	0.750202	1.069	163688	170187	166831	189111	195562	190176	194189	183142	171112	186973	185065	166389	324	324	324	1
XP_752248.1	Aspergillus fumigatus Af293	glycerol-3-phosphate dehydrogenase, mitochondrial	48	0.306911	0.405426	1.03513	0.451486	0.609229	1.02209	0.0785799	0.397988	0.964109	0.546382	0.915308	0.976404	592814	587361	603224	649720	607508	590214	629451	601189	619371	604973	632700	653829	1069	1069	1069	1
XP_750518.1	Aspergillus fumigatus Af293	transcription elongation complex subunit (Cdc68)	46	0.197748	0.275396	1.02184	0.629579	0.765133	1.01141	0.0786733	0.397747	0.949249	0.034919	0.716544	0.95904	233338	231798	224412	233885	238119	232540	240399	250777	235386	239563	246440	248687	735	735	735	1
XP_001481502.1	Aspergillus fumigatus Af293	THO complex component (Rlr1), putative	38	0.017892	0.0532953	1.0656	0.443678	0.600057	1.0355	0.0786801	0.397354	0.971681	0.998678	0.999622	0.999925	113422	113566	115304	120009	125394	119422	115855	120017	116429	116262	117508	131573	304	304	304	1
XP_753689.1	Aspergillus fumigatus Af293	conserved hypothetical protein	24	0.177674	0.252476	1.03958	0.0454544	0.127186	1.0801	0.0788155	0.397412	1.05407	0.63308	0.936637	1.01453	180574	178787	175104	190677	177392	187771	175664	163792	167764	182676	188018	177087	325	325	325	1
XP_748428.1	Aspergillus fumigatus Af293	tyrosinase, putative	13	0.125729	0.192179	0.825023	0.536199	0.691527	1.19684	0.0789407	0.398322	1.72691	0.343267	0.82186	1.19042	196879	204685	266271	190442	184274	171704	131645	181705	87102.2	209956	127092	133863	169	169	169	1
XP_749527.1	Aspergillus fumigatus Af293	serine/threonine protein phosphatase, putative	14	0.0830935	0.138242	1.07136	0.380236	0.533405	0.972317	0.0794454	0.400989	0.950883	0.257188	0.78053	1.04774	137545	130154	137582	140782	141859	151659	138936	143226	143961	144504	138111	131946	155	155	155	1
XP_748098.1	Aspergillus fumigatus Af293	20S cyclosome subunit (APC8), putative	8	0.0484379	0.0918313	1.23656	0.0243284	0.0953495	0.792925	0.079578	0.40077	0.855763	0.0182627	0.731126	1.33456	36747.1	44427.6	42701.8	46464.8	54903.4	51670.7	50441.9	45125.3	48870.7	42659.1	35465.7	36655.3	49	49	49	1
XP_751674.1	Aspergillus fumigatus Af293	vacuolar protein sorting-associated protein vps13	50	0.0103632	0.0434766	1.15278	0.247881	0.376903	0.855248	0.0795975	0.400163	0.862181	0.213447	0.751684	1.16212	81208.4	90281.6	85021.7	97355.1	99145.9	98931.7	108169	100580	89396.5	93584.2	93989.9	69171.5	284	284	284	1
XP_755738.2	Aspergillus fumigatus Af293	NADH-cytochrome b5 reductase	19	0.447877	0.579935	1.05054	0.0204188	0.0851448	0.813409	0.079638	0.400042	0.879124	0.0976028	0.709348	1.13541	1020285	1208791	1138611	1233465	1190113	1109085	1324825	1279088	1219660	1132465	1031222	952464	485	485	485	1
XP_747865.1	Aspergillus fumigatus Af293	conserved hypothetical protein	24	8.36245e-05	0.0191579	1.26176	0.135605	0.24038	1.13807	0.080128	0.40257	0.857932	0.130125	0.717118	0.951181	119514	120214	118260	146563	152496	152710	156771	137219	125077	152445	164847	157821	322	322	322	1
XP_753989.2	Aspergillus fumigatus Af293	ubiquitin C-terminal hydrolase family protein	4	0.804305	0.88583	0.983671	0.399479	0.554338	0.66098	0.0802616	0.402259	0.859752	0.604553	0.933739	1.27948	24569.9	25682.7	27341.5	25892.7	27610.4	22970.3	28568.1	33674.4	28220.5	15351.2	10989.1	46473.7	5	5	5	0.9986
XP_753067.1	Aspergillus fumigatus Af293	mRNA splicing factor (Prp18), putative	6	0.215228	0.296912	1.0888	0.0449379	0.127521	0.594793	0.0804972	0.404896	0.763154	0.0890378	0.699689	1.39699	57910.4	54562.6	65593	65536.5	61911	65933	83335.1	88363.4	63324.5	54384.1	52578.2	34315.7	39	39	39	1
XP_749121.1	Aspergillus fumigatus Af293	actin cortical patch assembly protein Pan1, putative	50	0.00675815	0.0387032	0.865088	0.0412982	0.122541	0.873555	0.0806709	0.404655	1.04703	0.507289	0.904546	1.03688	179212	185922	188338	157097	154641	167233	172194	180130	176260	148930	145836	167796	634	634	634	1
XP_754283.1	Aspergillus fumigatus Af293	vacuolar ATP synthase subunit d, putative	17	0.0111425	0.0452008	1.3553	0.0542371	0.135614	1.07468	0.0807518	0.40436	0.862643	0.0808117	0.688682	1.08789	181642	212478	221858	269663	294878	268070	245978	234478	231267	249009	264691	251189	327	327	327	1
XP_754998.1	Aspergillus fumigatus Af293	multicopy suppressor of stt4 mutation	7	0.10718	0.167961	0.90347	0.201224	0.3237	0.4169	0.0809837	0.404653	0.866796	0.331762	0.812648	1.87845	54289.6	61857.6	63031.2	52804.5	53415.4	55343.8	69479.6	63874	73237.4	49244.8	52264.9	9150.37	50	50	50	1
XP_750307.1	Aspergillus fumigatus Af293	glycogenin	6	0.0670419	0.115346	0.20013	0.693331	0.815003	0.875822	0.081021	0.404203	4.60674	0.864945	0.985403	1.05266	133474	26421.9	215274	18554.5	21965.1	14931.5	24960.5	14099.5	22065.6	11740.2	28396	15649	8	8	8	1
XP_749193.1	Aspergillus fumigatus Af293	GNAT family acetyltransferase, putative	4	0.52108	0.655669	1.05026	0.083726	0.172024	1.36304	0.0810376	0.4036	1.26483	0.831795	0.977609	0.974587	57636.1	56185.6	58378.2	68989.1	57704.1	55014.1	41733.6	40381.5	55437.7	55232.6	57939.6	73931.2	31	31	31	1
XP_752315.1	Aspergillus fumigatus Af293	vacuolar protein sorting 29, putative	12	0.0184961	0.0537255	1.22302	0.000243693	0.052	1.09897	0.0811597	0.404024	0.886237	0.238172	0.777983	0.986271	567037	481074	491846	627974	614623	635923	576730	570624	585707	634264	634378	635840	147	147	147	1
XP_747240.1	Aspergillus fumigatus Af293	protein-histidine N-methyltransferase	4	0.210387	0.290819	1.53497	0.118069	0.217447	0.785714	0.0813313	0.404738	0.507037	0.933857	0.992459	0.990546	17413.2	7936.06	19810.1	21650.1	20281.8	22547.7	26491.4	31297.8	25329.8	17825.5	22606.5	25279.5	13	13	13	1
XP_755534.2	Aspergillus fumigatus Af293	U6 snRNA-associated Sm-like protein LSM4, putative	5	0.630548	0.759014	1.07926	0.00383188	0.0602292	0.644688	0.081608	0.406104	0.72472	0.0892446	0.694182	1.21324	131767	193212	204887	197171	169835	195825	232882	241425	243742	136377	154079	174747	116	116	116	1
XP_754826.2	Aspergillus fumigatus Af293	extracellular serine-rich protein, putative	11	0.825325	0.89871	0.967081	0.320823	0.463982	1.27679	0.0817106	0.406279	1.20362	0.725676	0.953084	0.911661	76030.9	80135.2	98103.7	81627.2	66228.8	100001	72551.9	67849.5	69636.1	60522.7	127069	92774.5	75	75	75	1
XP_753441.1	Aspergillus fumigatus Af293	rRNA methyltransferase Spb1, putative	16	0.955015	0.977301	1.00128	0.0285397	0.100673	0.869272	0.0819693	0.407413	0.92163	0.12514	0.705925	1.06159	158070	156214	166437	159100	163186	158902	172981	183305	165568	151181	158987	143468	203	203	203	1
XP_747861.1	Aspergillus fumigatus Af293	3' exoribonuclease family protein	10	0.0109397	0.0440456	1.25194	0.56396	0.71447	1.06151	0.082107	0.406994	0.887395	0.653899	0.93865	1.04659	64873.1	73594.4	72864.4	91736.3	89486.5	83153	83790.7	79274.9	74944.8	95231.2	88411.3	70723.4	80	80	80	1
XP_755545.1	Aspergillus fumigatus Af293	conserved hypothetical protein	2	0.550827	0.68578	0.908213	0.146257	0.25416	0.6056	0.0825857	0.409341	0.675495	0.963452	0.993955	1.01303	19721.6	15637.7	23623.6	15049.4	20359.8	17812.9	35906.5	27822.5	23660.7	19156	10810.4	25351.7	13	13	13	0.9991
XP_754292.1	Aspergillus fumigatus Af293	hypothetical protein AFUA_3G13300	11	0.00916224	0.042228	0.791656	0.214034	0.335815	1.28912	0.0827866	0.409746	1.4711	0.180709	0.764143	0.903409	69166.1	73306.7	63031	54799.7	51796.5	55862.9	37577.3	41835.6	63854.6	57474.8	55642.2	67245.9	31	31	31	1
XP_754460.1	Aspergillus fumigatus Af293	Taz1-interacting factor 1 (TAF1), putative	11	0.857001	0.920093	1.04208	0.386182	0.541162	1.29894	0.0831565	0.411647	1.71368	0.275112	0.782334	1.37481	18102.2	33284.6	33622.5	25315.4	31589.7	28666.5	12883.3	19074.8	16380.4	25586.4	27135.2	12706.8	18	18	18	1
XP_749079.1	Aspergillus fumigatus Af293	RhoGAP and Fes/CIP4 domain protein	29	0.613376	0.742272	0.976672	0.14887	0.257686	0.937943	0.083176	0.411153	0.939463	0.677519	0.937602	0.978255	146085	151345	147648	141868	136492	157055	150843	164464	158696	151340	140716	152543	328	328	328	1
XP_751221.1	Aspergillus fumigatus Af293	nitrilase	10	0.025173	0.0629125	0.918511	0.0912514	0.180663	1.27711	0.0832725	0.410731	1.27774	0.0876738	0.700986	0.918969	90494.1	94062.6	95654.9	86302.1	88172.4	82917	64952.3	66624.2	90195.6	99435.5	89002.9	91864.8	71	71	71	1
XP_750742.1	Aspergillus fumigatus Af293	sister chromatid separation protein (Src1), putative	25	0.0396863	0.0801322	1.05533	0.432483	0.589027	1.04561	0.0833272	0.410311	0.942437	0.352933	0.831645	0.951198	71277.5	72728	74050.2	75518	78890	75729.8	78856.1	79017.8	73597.4	80917.3	74393.8	87085.9	157	157	157	1
XP_747976.1	Aspergillus fumigatus Af293	transcription initiation factor TFIID complex 60 kDa subunit	13	0.106819	0.167809	1.07273	0.0087076	0.0612768	1.23986	0.083365	0.40971	1.08517	0.220825	0.760641	0.938893	115396	118926	123771	129039	133530	121691	115741	109808	104586	133300	130399	145749	92	92	92	1
XP_748057.2	Aspergillus fumigatus Af293	integral membrane protein, putative	6	0.804686	0.885684	0.981868	0.0329271	0.108082	0.838568	0.0833794	0.409111	0.850191	0.936152	0.992987	0.995478	88208.3	92910.7	75167.4	83910.8	79562.3	87345.1	103289	94150.7	103081	80172.4	80166.5	91971	42	42	42	1
XP_748432.1	Aspergillus fumigatus Af293	GMP synthase	43	0.29474	0.389775	0.971392	0.422185	0.57808	1.02052	0.083735	0.410231	1.03969	0.732713	0.954428	0.989636	920630	892805	878887	902390	871088	842367	866566	876202	846569	847948	886203	909134	1022	1022	1022	1
XP_749324.1	Aspergillus fumigatus Af293	ubiquinone biosynthesis protein Coq7, putative	11	0.247109	0.332949	0.924411	0.0970756	0.186936	0.910222	0.0838204	0.410157	0.923354	0.36995	0.840894	0.937748	97034.5	90402.1	94621.3	87851.7	78687.5	94849.1	98150.1	107538	99893.3	99015.3	90110.5	89115.6	171	171	171	1
XP_747594.1	Aspergillus fumigatus Af293	hypercellular protein HypA	13	0.0279799	0.0654186	1.21551	0.935857	0.963042	1.01889	0.0839056	0.410236	1.11554	0.265372	0.78326	1.33081	69128.2	71846.5	66277.1	76082.5	91249.4	85149.3	66274.9	57393.2	62338.4	75262.3	80973	41155.4	65	65	65	1
XP_750443.1	Aspergillus fumigatus Af293	chorismate synthase	25	0.0231814	0.0603779	0.838174	0.893275	0.940495	0.990433	0.0840147	0.410587	1.17164	0.863711	0.984901	0.991521	690679	788246	753955	655637	624709	590125	699074	636842	573256	657364	643520	586154	677	677	677	1
XP_752675.1	Aspergillus fumigatus Af293	C2H2 transcription factor, putative	5	0.138983	0.205465	0.893695	0.530315	0.686071	0.976424	0.0841526	0.410642	1.1492	0.222485	0.759868	1.05183	76925.4	91234.9	79465	73226.2	69850.2	77829	69536.4	76210.5	69341.3	67881.6	71589.2	70393.7	34	34	41	1
XP_752748.1	Aspergillus fumigatus Af293	histone H4.1	13	0.124677	0.189858	1.08898	0.00476766	0.0542447	1.43479	0.0842147	0.410214	1.12145	0.0521958	0.676809	0.851163	2857102	3212721	2799520	3225002	3261288	3155184	2515881	2630978	2752526	4205587	3713766	3445591	428	47	428	1
XP_754852.1	Aspergillus fumigatus Af293	ER-Golgi SNARE complex subunit (Sed5), putative	8	0.921777	0.959851	0.996405	0.00231544	0.058697	0.841809	0.084355	0.410327	0.924542	0.0229727	0.710775	1.09433	69373.9	74480.4	77806.9	72345.6	73943.8	74344.8	79285.2	81090.9	79124.8	69908.3	64410.2	67396.1	62	62	62	1
XP_754959.1	Aspergillus fumigatus Af293	DHHC zinc finger membrane protein, putative	6	0.747503	0.850911	0.962212	0.092984	0.182152	1.27428	0.084375	0.409844	1.25469	0.679792	0.937398	0.947418	39283.9	32394.2	32751.9	32890.3	39420.4	28638	32147.3	24953	26305.2	41170.9	33163.2	31978.7	20	20	20	1
XP_746584.1	Aspergillus fumigatus Af293	GPI-anchor biosynthetic protein (Mcd4), putative	17	0.0365958	0.0766614	1.18453	0.807244	0.887652	1.0116	0.0845029	0.40972	0.869583	0.632004	0.937482	1.01823	51684.4	61823.8	57619.6	66420.8	66085.9	69712.3	65926.3	68870.7	61667.9	68753.9	67656.6	62312.7	139	139	139	1
XP_755437.1	Aspergillus fumigatus Af293	U-box domain protein, putative	12	0.422986	0.551606	1.04592	0.0314948	0.107137	1.14831	0.0845746	0.409297	1.10868	0.848663	0.985319	1.00982	96881.4	104225	104125	100045	115877	103770	94817.2	95739.2	84990.9	104381	102481	109210	108	108	108	1
XP_755757.1	Aspergillus fumigatus Af293	conserved hypothetical protein	5	0.574387	0.710443	1.33645	0.32795	0.471854	0.686832	0.0846875	0.409197	0.531958	0.949588	0.994779	1.03509	22587.7	46472.6	18987.8	16792.6	58075.9	48784.8	54972.7	49612.6	48548	52100.8	17979.2	45798	14	14	14	1
XP_754757.1	Aspergillus fumigatus Af293	glycine-rich RNA-binding protein, putative	6	0.176837	0.251411	0.898598	0.086897	0.176206	0.795973	0.0848286	0.409966	0.887577	0.986091	0.99653	1.00201	656024	691474	761119	693516	591015	611207	746533	821050	805586	539180	752016	614135	284	284	284	1
XP_750976.1	Aspergillus fumigatus Af293	acyl-CoA dehydrogenase family protein	15	0.277923	0.369878	0.85801	0.0453188	0.127443	0.599848	0.0852038	0.412029	0.79773	0.528688	0.909127	1.14106	44958	58175.5	46129.7	43950	35714.5	48551.4	60913.2	56743.1	68759.9	28447.2	50780.2	35509.8	85	85	85	1
XP_749242.1	Aspergillus fumigatus Af293	Rho	7	0.0795205	0.132074	1.19811	0.14485	0.252072	0.750303	0.0854654	0.412493	0.831196	0.145342	0.735501	1.32729	49745	60191.1	59759.8	71053.7	61636.6	70268.6	61595.5	73720.3	68619	63138.2	54677	38123.6	57	57	57	1
XP_755095.1	Aspergillus fumigatus Af293	SRP receptor beta subunit (Srp102), putative	11	0.26843	0.35879	0.955212	0.000595572	0.0524762	0.793993	0.0854709	0.411903	0.919808	0.00946971	0.691184	1.10657	169562	153731	166717	157437	150277	160093	184950	174471	173062	139764	139053	143831	180	180	180	1
XP_749253.1	Aspergillus fumigatus Af293	1,3-beta-glucanosyltransferase	18	0.957377	0.978784	1.00463	0.000295784	0.0464286	1.3988	0.0855551	0.411629	1.20528	0.00500302	0.540571	0.865648	331968	348190	428982	367962	356907	382839	298734	296714	319497	415905	424358	439162	407	407	407	1
XP_747692.1	Aspergillus fumigatus Af293	signal sequence receptor alpha subunit, putative	16	0.204631	0.284496	0.959678	0.0808858	0.168227	0.881464	0.08559	0.411549	0.931714	0.797741	0.971635	1.01439	86203.9	82676.5	85632	77666.6	82706.8	83974.2	90166.6	96009.1	87164.4	78178.3	75276.2	87814.8	128	128	128	1
XP_750259.1	Aspergillus fumigatus Af293	GARP complex subunit Vps53, putative	8	0.311807	0.411209	1.13889	0.760199	0.857041	1.01855	0.0857618	0.41147	0.793483	0.179424	0.766619	0.887234	27523.1	38248.5	31756.4	37513.5	32775.5	40165.5	39012.4	43643.6	39301.2	41215.9	38447.8	44620.9	31	31	31	1
XP_747998.1	Aspergillus fumigatus Af293	thymidylate kinase	8	0.0696029	0.1194	1.2347	0.387835	0.541755	1.12508	0.0857912	0.410885	0.865611	0.722251	0.951944	0.949953	53066	56373.3	46257.8	70107.5	56705.5	65520	62556.5	57417.5	59400.5	63232.5	84621.9	56785	54	54	54	1
XP_754744.1	Aspergillus fumigatus Af293	conserved hypothetical protein	4	0.0202882	0.0563213	0.848307	0.0512566	0.13202	0.431173	0.0859511	0.410858	0.875653	0.147281	0.735535	1.7228	46280.8	44068.3	48732.1	40672.2	36771.9	40568.4	50569.9	58549.1	49995.7	37348.8	13201.9	24065.2	30	30	30	1
XP_747270.1	Aspergillus fumigatus Af293	RNA-3'-phosphate cyclase family protein	16	0.00205306	0.0383277	1.23964	0.938929	0.964459	1.00619	0.0859732	0.41044	0.85151	0.29923	0.794095	1.04907	115885	127649	121630	153886	150566	147928	147138	157083	126085	136141	154849	140819	164	164	164	1
XP_755504.1	Aspergillus fumigatus Af293	CobW domain protein	11	0.122599	0.187738	0.929525	0.025653	0.0991893	0.849882	0.085988	0.409858	0.93663	0.670574	0.938904	1.0244	93404	98526.1	96916.1	89644	84288.4	94799.6	101125	107775	99593.6	80963.1	92841.1	88645.3	96	96	96	1
XP_754764.1	Aspergillus fumigatus Af293	morphogenesis protein (Msb1), putative	32	0.011148	0.0451642	0.919349	0.369451	0.52245	0.953537	0.0861836	0.410207	1.06818	0.517397	0.909139	1.02988	148866	150290	150601	138808	141727	133084	141930	132876	146587	142295	125149	134589	347	347	347	1
XP_755397.1	Aspergillus fumigatus Af293	SAGA complex subunit (Ada2), putative	8	0.287973	0.382436	0.697912	0.213781	0.336193	0.840542	0.0862449	0.409825	0.900825	0.406081	0.86009	0.747966	27235	26682.7	25224.9	23186	10286.6	26127.2	27106.3	29826.4	31016.6	20274.3	24698.8	29738.6	39	39	39	1
XP_749457.1	Aspergillus fumigatus Af293	Bax Inhibitor family protein	7	0.0257242	0.0636963	1.65769	0.0726232	0.157764	0.823287	0.087043	0.413427	0.700972	0.00314061	0.563818	1.41141	151603	170293	107086	221625	224054	253616	231603	183342	189030	168344	172104	154598	182	182	182	1
XP_750438.1	Aspergillus fumigatus Af293	alpha-1,2-mannosyltransferase (Alg11), putative	6	0.114023	0.176038	1.24269	0.433009	0.589432	0.839968	0.0871018	0.412845	0.754205	0.594938	0.934171	1.11581	20595.9	23810.2	23305.4	23135	29625.3	32000.5	34990.9	32002.3	23790.1	25484.1	32988	18780	20	20	20	1
XP_755155.1	Aspergillus fumigatus Af293	conserved hypothetical protein	6	0.44238	0.571688	0.59487	0.00501236	0.0532358	0.17639	0.0871132	0.412264	0.771126	0.22942	0.762904	2.6006	89881.8	103683	124448	19218.5	139730	90913.1	121719	153186	135648	42030.9	14839.9	22254.5	22	22	32	1
XP_749128.1	Aspergillus fumigatus Af293	C2 domain protein	20	0.718682	0.827448	0.972477	0.404413	0.559096	0.906788	0.0871391	0.411831	0.905533	0.818614	0.976013	0.971132	82110.8	82388.7	84910.1	80328.3	71672.9	91757.5	86679.4	89437.7	99787.7	68777.3	93234.8	89951.3	224	224	224	1
XP_753047.1	Aspergillus fumigatus Af293	conserved hypothetical protein	11	0.636119	0.762712	0.98496	0.435202	0.592672	1.0658	0.0874167	0.412628	1.1195	0.6096	0.934589	1.03459	45187.8	46621	47801.3	48146.4	44851.4	44561.4	37799.7	43514.3	43636.6	44353.6	40153.8	48791.4	52	52	52	1
XP_751823.1	Aspergillus fumigatus Af293	DUF618 domain protein	13	0.741057	0.845929	0.974678	0.0420639	0.123785	1.16291	0.0874755	0.412319	1.09298	0.331502	0.813134	0.916061	108280	97782.1	101078	93649	113732	93037.3	96292	95728.7	88919.1	103346	104933	118868	117	117	117	1
XP_750244.1	Aspergillus fumigatus Af293	serine/threonine protein phosphatase PP1, putative	18	0.0105884	0.0433798	1.09873	0.855407	0.920546	0.991215	0.0876159	0.412185	0.96119	0.246536	0.77126	1.06545	328547	325331	340383	354056	373694	364737	340734	341208	352394	332176	372555	322411	329	329	329	1
XP_753302.1	Aspergillus fumigatus Af293	ribosome biogenesis protein Ria1, putative	46	0.211954	0.29273	1.02183	0.0130332	0.0730596	0.909203	0.0876361	0.411777	1.04522	0.000864568	0.459556	1.17469	292029	293499	298151	308118	300539	294430	284713	289197	271795	261182	250405	257182	466	466	466	1
XP_748119.1	Aspergillus fumigatus Af293	actin interacting protein 2	28	0.479103	0.613684	0.978438	0.0380847	0.118397	0.888463	0.0877075	0.411649	0.928753	0.551588	0.91463	1.02281	478158	507736	466248	462654	475773	481694	533991	529663	499564	470617	484614	434490	682	682	682	1
XP_747656.1	Aspergillus fumigatus Af293	conserved hypothetical protein	5	0.00222191	0.0366383	1.30359	0.267818	0.399279	0.783679	0.0877822	0.411727	0.698155	0.241173	0.77367	1.16132	33407.8	36440.5	33840.2	43297.5	44487.9	47378.4	65117.5	49263	37739.1	43775.3	42359.8	31422.6	35	35	35	1
XP_754191.1	Aspergillus fumigatus Af293	GTP binding protein	11	0.0919781	0.149874	0.804167	0.0294292	0.102041	0.651151	0.0881842	0.414114	0.74738	0.46036	0.88629	0.92301	32108.4	42575.1	37456.8	30761.5	26809	32289.1	58333.9	50977.6	41245.9	28168.4	37273.1	32252.8	43	43	43	1
XP_750298.1	Aspergillus fumigatus Af293	histone deacetylase complex subunit (Hos4), putative	7	0.369876	0.483522	0.732097	0.0129699	0.0735467	0.758623	0.0883828	0.414811	1.26265	0.543511	0.916355	1.2185	37358.4	27184	31038	38709.5	22919.4	13940.6	25572.4	26836.8	22816.2	17631.6	20482.7	18929.7	14	14	14	1
XP_746962.1	Aspergillus fumigatus Af293	C-4 methyl sterol oxidase, putative	5	0.00654869	0.0388702	0.650913	0.00786001	0.0613497	0.543339	0.0885203	0.415417	0.897448	0.633835	0.936579	1.07513	193143	182280	199337	138710	106962	130448	225243	218736	197063	118833	139996	93613	112	112	112	1
XP_753582.1	Aspergillus fumigatus Af293	histone-like transcription factor, putative	6	0.423766	0.552743	0.937444	0.0145655	0.0760493	0.822352	0.0885557	0.414842	0.851726	0.578567	0.923029	0.970929	61690.5	54810.5	49578	54430	52574.4	48260.7	65508.2	68169.5	60755.4	52058	56842.9	50989.4	54	54	54	1
XP_754647.1	Aspergillus fumigatus Af293	cleavage and polyadenylylation specificity factor, putative	22	0.746626	0.85034	1.01505	0.0286536	0.100986	0.935599	0.0886326	0.414373	0.915072	0.796147	0.972362	0.992783	75767.8	84064.8	85812.6	81237.2	86277.9	81557.3	90444.9	87742.8	89885.4	81001	83778.8	86085.4	162	162	162	1
XP_751591.1	Aspergillus fumigatus Af293	PHD finger domain protein, putative	8	0.39946	0.52066	1.10153	0.0621348	0.145116	0.463631	0.0887159	0.414066	0.711844	0.131402	0.722589	1.69126	76682.4	104534	88529.2	88936.2	102150	104403	152293	129263	99937.9	81926.6	70655.7	33871.2	31	31	31	1
XP_754315.1	Aspergillus fumigatus Af293	hypothetical protein AFUA_3G13070	5	0.0987792	0.158221	0.771554	0.584425	0.730578	0.848434	0.0887671	0.413495	1.5392	0.221692	0.759009	1.39973	43273.7	62179.1	58651.2	38200.6	44354.6	42779.6	33109.8	47183.2	27702.4	33680.4	40988	19146.1	25	25	25	1
XP_751133.1	Aspergillus fumigatus Af293	mitochondrial carrier protein, putative	9	0.0921483	0.150174	1.22276	0.973856	0.983834	0.99781	0.0887881	0.412926	0.870932	0.518126	0.908349	1.06727	383167	374758	343710	455446	384414	515364	443266	444112	379509	394630	445761	421921	242	242	242	1
XP_752314.1	Aspergillus fumigatus Af293	aminotransferase, class V, putative	19	0.0114456	0.0459926	1.1876	0.597368	0.739914	1.02426	0.0888666	0.412737	0.908588	0.239472	0.777263	1.05348	635195	668926	601036	766501	719224	775931	679655	676118	740924	706226	756592	684723	445	445	445	1
XP_754222.1	Aspergillus fumigatus Af293	conserved hypothetical protein	8	0.00154374	0.0388052	0.748149	0.256001	0.383754	0.895983	0.0889119	0.412363	1.12009	0.426844	0.869851	0.935279	89970.6	86022.4	83621.2	63081.3	68856.4	62395	76709.4	83892.3	71565	62411.3	67291.3	78876.7	50	50	50	1
XP_751109.1	Aspergillus fumigatus Af293	conserved hypothetical protein	6	0.0066703	0.0390932	1.36962	0.999019	0.999585	0.999816	0.0891534	0.413053	0.846267	0.330694	0.812253	1.15928	107283	98280	87105.5	133810	131135	134473	123641	106202	115405	100326	149951	100674	67	67	67	1
XP_752317.1	Aspergillus fumigatus Af293	ubiquitin-protein ligase (Rsp5), putative	30	0.57458	0.71052	1.01848	0.87082	0.927306	1.00754	0.0891755	0.412652	0.96649	0.668526	0.939902	0.976982	165854	165580	166248	160467	178026	168842	173608	174895	166553	175458	160213	184001	324	324	324	1
XP_747662.1	Aspergillus fumigatus Af293	protein transport protein sec22	3	0.163604	0.236375	1.23304	0.752763	0.851579	0.978881	0.0892004	0.412252	0.829924	0.707686	0.942172	1.04541	56939.2	72858.4	72384.4	80769.2	71221.4	97861.7	83717.7	80125.4	78312.8	76558.3	72544.8	88717.8	74	74	74	1
XP_752850.1	Aspergillus fumigatus Af293	serine/threonine protein kinase (Kin4), putative	7	0.828086	0.900687	1.02127	0.0799295	0.166642	0.760575	0.0893459	0.412667	0.824257	0.447016	0.880272	1.10678	28552	34367.5	38364.8	33296.7	33230	36241.9	40240.6	41302.6	40447.2	34743.2	34785.2	24473.3	24	24	24	1
XP_749677.1	Aspergillus fumigatus Af293	DNA-directed RNA polymerase I 13.1 kDa polypeptide, putative	9	0.0140971	0.0484379	0.804023	0.321518	0.465357	0.941621	0.0893909	0.412513	1.11132	0.415642	0.865156	0.948925	113456	100778	98587.5	85461.9	79014.8	86763.5	90404.3	94540.6	96091.8	81267.4	87376.6	96563	66	66	66	1
XP_754468.1	Aspergillus fumigatus Af293	O-acetyltransferase, putative	11	0.967964	0.983875	0.997996	0.357604	0.507161	0.94157	0.0895452	0.413155	0.861849	0.0539867	0.676722	0.913498	113452	97087.5	101746	104455	101887	104672	120438	131038	110927	117058	106373	117361	75	75	75	1
XP_751007.1	Aspergillus fumigatus Af293	C6 transcription factor, putative	4	0.0315468	0.0698861	0.622851	0.299822	0.434936	0.695886	0.0898076	0.414014	0.800327	0.359599	0.836247	0.716332	34336.5	29828	27708.7	14612.7	21260.5	22072.2	37737.2	43806.1	33488	21591	18222.8	47415.5	21	21	21	1
XP_754956.2	Aspergillus fumigatus Af293	iron-sulfur cluster biosynthesis protein Isd11, putative	7	0.138125	0.205735	0.930424	0.0997462	0.190195	1.0964	0.0898653	0.413728	1.08522	0.141735	0.72519	0.920937	194196	193796	174033	179192	171287	171876	173737	173168	170337	180171	182131	205827	67	67	67	1
XP_752133.1	Aspergillus fumigatus Af293	methionine aminopeptidase, type II, putative	15	0.0222357	0.0587638	1.15031	0.543552	0.698406	0.968705	0.0901377	0.414469	0.898149	0.167076	0.75709	1.06652	378844	351903	333547	398803	409562	414387	407880	405951	370673	376662	409461	361749	420	420	420	1
XP_754284.1	Aspergillus fumigatus Af293	ribose-phosphate pyrophosphokinase	22	0.00902788	0.0420519	1.17441	0.368551	0.52157	0.970531	0.0901853	0.414179	0.936025	0.0209972	0.706653	1.13266	263033	288078	264458	312514	314945	329787	291181	291486	287895	281107	296548	267965	431	431	431	1
XP_748083.1	Aspergillus fumigatus Af293	20S cyclosome subunit (Cut9/Cdc16), putative	3	0.891907	0.942367	0.973763	0.31367	0.451949	1.28973	0.0906037	0.416655	1.77816	0.0761433	0.68426	1.34254	31024.2	19499.9	33575.6	30411	23941.9	25758.9	13221.1	12071.6	22636.7	17096.5	18841.3	24061.3	10	10	10	0.9705
XP_751217.1	Aspergillus fumigatus Af293	nuclear mRNA splicing factor, putative	52	0.000311741	0.0282609	1.04777	0.44362	0.600184	1.01877	0.0906219	0.416249	0.956364	0.158897	0.748116	0.983584	752581	747626	742637	781665	784784	783496	801631	792533	751888	785898	792284	811197	616	616	616	1
XP_751734.1	Aspergillus fumigatus Af293	DlpA domain protein	3	0.0768891	0.128292	0.893183	0.101919	0.191346	0.818291	0.0907672	0.416707	0.927076	0.911788	0.991108	1.01192	38558.3	37910.1	36827.2	35428.4	30778.8	35177.1	38310.4	41490.3	42504.2	32456.6	39365.9	28973.2	29	29	29	1
XP_751021.1	Aspergillus fumigatus Af293	mitochondrial import receptor subunit (Tom20), putative	11	0.985168	0.993523	0.998282	0.0281632	0.101098	1.23243	0.0908517	0.416302	1.16842	0.531902	0.911213	0.946438	651249	530535	615363	570847	673062	550525	477008	524644	532600	686464	574196	632990	286	286	286	1
XP_755516.1	Aspergillus fumigatus Af293	transcriptional corepressor Cyc8, putative	20	0.654566	0.780047	0.990021	0.156738	0.267894	1.13715	0.0909212	0.415742	1.0649	0.348217	0.82631	0.927121	204157	197448	199273	201764	191176	202078	197420	180160	187018	189001	215785	239829	239	239	239	1
XP_753795.1	Aspergillus fumigatus Af293	high osmolarity signaling protein Sho1, putative	2	0.352822	0.460202	0.587658	0.141302	0.246049	1.33766	0.0909924	0.415473	1.45628	0.424456	0.869828	0.639771	39895.8	58206.4	48409.8	45157.4	10560.6	47839.3	40611.2	26023.9	34441	38704.9	42636.2	52794.2	19	19	19	0.9991
XP_747628.1	Aspergillus fumigatus Af293	Snf1 kinase complex beta-subunit	7	0.572563	0.708577	0.958312	0.19151	0.31378	1.21866	0.0910541	0.414915	1.24979	0.87405	0.986861	0.982798	68328.9	72020.7	59249.8	60239.1	62344.4	68327.1	62437.8	48058.9	49775.1	62646.6	55792.7	77339.5	51	51	51	1
XP_755741.1	Aspergillus fumigatus Af293	chromosome segregation protein SudA, putative	42	0.101758	0.161757	0.954292	0.156648	0.267935	0.933987	0.0912371	0.415603	0.937802	0.282682	0.787234	0.95819	99766.8	94293.1	96979.3	91565.8	95327.8	90831.5	98591	105535	106311	93909.1	93383.5	102768	327	327	327	1
XP_747612.1	Aspergillus fumigatus Af293	centromere protein Cse4, putative	4	0.338284	0.440816	1.0372	0.840869	0.911311	1.00719	0.0913994	0.41592	0.933687	0.335117	0.815458	0.961507	108290	98033.2	103873	104930	110882	105751	108512	110607	112875	111698	105424	117546	41	41	41	1
XP_755431.2	Aspergillus fumigatus Af293	ADP-ribosylation factor, putative	10	0.00540761	0.0393504	1.45045	0.611694	0.751148	1.11206	0.0914528	0.415471	0.809447	0.779394	0.968511	1.05575	174233	206461	191024	251825	294603	282636	262851	246204	200210	245213	363131	200110	152	152	152	1
XP_749449.1	Aspergillus fumigatus Af293	peptide methionine sulfoxide reductase	8	0.376329	0.49134	0.973244	0.509308	0.666066	0.939776	0.0916236	0.415968	1.10637	0.154287	0.740405	1.14577	205525	213540	223191	206285	213769	204773	193681	180615	206767	199712	192423	156219	139	139	139	1
XP_752284.1	Aspergillus fumigatus Af293	protein kinase activator (Mob2), putative	8	0.15701	0.227198	1.22833	0.04693	0.12881	0.692035	0.0917759	0.416704	0.72124	0.0589911	0.66674	1.28017	228613	324007	300491	365069	311069	363250	431915	432996	317224	281270	301409	231928	154	154	154	1
XP_753353.1	Aspergillus fumigatus Af293	CRAL/TRIO domain protein	23	0.00149714	0.0385	1.15208	0.00465374	0.0551169	1.13282	0.0918328	0.416314	0.950616	0.115952	0.705423	0.966773	337550	327005	337571	377204	396180	381271	348276	340970	365260	396018	393859	404273	529	529	529	1
XP_747790.1	Aspergillus fumigatus Af293	isocitrate lyase	23	0.246602	0.332936	1.07421	0.826862	0.901193	1.01361	0.091897	0.415761	0.906998	0.574086	0.920672	0.961224	132822	135294	132009	138119	134044	158827	144659	137650	159666	139978	159674	148136	243	243	243	1
XP_752296.1	Aspergillus fumigatus Af293	cholinephosphate cytidylyltransferase	21	0.00923734	0.0421151	1.10357	0.146315	0.2543	0.956312	0.0922328	0.41625	0.942113	0.00960071	0.669255	1.08718	271181	285301	283156	316942	307034	302566	307552	298674	285209	290670	281156	280369	224	224	224	1
XP_748154.1	Aspergillus fumigatus Af293	conserved hypothetical protein	7	0.00426704	0.0356053	1.4309	0.00315095	0.0589333	1.52391	0.0923965	0.416472	1.16631	0.187644	0.757399	1.09512	154340	165338	147934	215478	246728	208028	141455	142585	117973	195348	212220	203124	85	85	85	1
XP_751772.1	Aspergillus fumigatus Af293	transcription regulator BDF1, putative	30	0.39519	0.515331	0.972564	0.0164382	0.0790822	0.873868	0.0926665	0.417144	0.930786	0.314126	0.804049	1.03591	219839	218258	231379	214555	226668	210004	236675	252376	230488	213100	201028	214462	361	361	361	1
XP_750608.1	Aspergillus fumigatus Af293	actin binding protein, putative	8	0.432642	0.561099	0.960749	0.666964	0.794809	0.964778	0.0929227	0.418302	0.933651	0.436534	0.877958	0.929752	42094.6	41447.9	38677.7	41006.8	36293	40210.7	43942.2	42189	44725.5	36230.7	44561.7	46119.1	62	62	62	1
XP_752811.1	Aspergillus fumigatus Af293	60S ribosomal protein L17	18	0.128727	0.194506	1.08028	0.00122226	0.0442353	1.35332	0.0930145	0.417886	1.08138	0.0242505	0.716821	0.863214	6548265	6239298	5881143	6699257	7032208	6430132	5952830	5646146	5653391	7630399	7442995	8292532	692	692	692	1
XP_748963.1	Aspergillus fumigatus Af293	conserved hypothetical protein	15	0.00856264	0.0406933	1.13061	0.454679	0.612966	1.02714	0.0930669	0.417625	0.923537	0.450205	0.88112	1.01657	433665	441516	459688	497432	521688	490186	482368	508595	455462	497830	497324	489069	180	180	180	1
XP_750666.2	Aspergillus fumigatus Af293	MFS phospholipid transporter (Git1), putative	5	0.162778	0.235424	0.891137	0.919599	0.95409	0.987723	0.0931231	0.417075	1.19469	0.517743	0.908377	1.07787	143635	138367	158997	123406	145424	124607	121779	139126	109379	142036	103453	121529	70	70	70	1
XP_754629.2	Aspergillus fumigatus Af293	GTPase activating protein Sar1, putative	15	0.42191	0.550144	0.969585	0.086702	0.176009	0.896536	0.093696	0.419384	0.932022	0.881577	0.987876	1.00796	658542	711697	673303	661269	689548	630819	698576	748854	745075	601427	688952	677863	73	73	73	1
XP_755956.1	Aspergillus fumigatus Af293	uracil phosphoribosyltransferase	7	0.113945	0.176005	1.35037	0.00419628	0.0582667	0.746534	0.0938258	0.419443	0.718258	0.00351879	0.5304	1.29922	32072.4	52345.7	46127.4	60514.3	56314	55957	62384.8	55326.4	60550.8	41624.5	44593.8	46844.2	65	65	65	1
XP_746493.1	Aspergillus fumigatus Af293	DEAD/DEAH box helicase, putative	20	0.288665	0.383419	1.07707	0.0837434	0.171985	0.567458	0.0939333	0.420063	0.854322	0.118932	0.714899	1.62156	32688.8	34932.6	33216.7	32345.3	37508.4	39064.2	36209.8	45117.7	37234.8	30392.5	26136	13993.2	47	47	47	1
XP_755892.1	Aspergillus fumigatus Af293	RAS small monomeric	15	0.611275	0.740288	0.97427	0.0307313	0.10558	1.14875	0.0945357	0.421761	1.11898	0.232323	0.766931	0.949025	411913	357297	384343	359912	390386	372308	350468	322658	357024	417020	386624	379590	231	231	269	1
XP_752351.1	Aspergillus fumigatus Af293	mitochondrial inner membrane translocase subunit TIM44, putative	29	0.783323	0.874093	0.99445	0.805439	0.887268	0.992735	0.0946137	0.421686	0.956909	0.189432	0.756135	0.958563	527814	514216	540692	530671	511934	531235	554084	563102	536787	527272	543140	572161	556	556	556	1
XP_753812.1	Aspergillus fumigatus Af293	MutT/nudix family protein	7	0.266601	0.356749	1.10401	0.107216	0.199158	0.877912	0.0946219	0.421135	0.811621	0.478074	0.892152	1.02065	131898	160998	167554	166275	175367	164194	206805	191542	168006	159892	166649	168996	107	107	107	1
XP_753495.1	Aspergillus fumigatus Af293	tRNA(m5U54)methyltransferase	18	0.170066	0.243373	1.1166	0.12055	0.220668	0.914708	0.0948103	0.421117	0.860241	0.293664	0.794011	1.05011	168284	205242	197690	217704	216878	201328	216511	234963	210840	200379	213678	191720	136	136	136	1
XP_746606.1	Aspergillus fumigatus Af293	myo-inositol-1(or 4)-monophosphatase	6	0.963853	0.981902	1.00753	0.0584555	0.141408	0.383622	0.095022	0.421252	0.76182	0.139226	0.723781	2.00081	59305.8	77468.1	62514.8	70976.6	51525.4	80321.9	74752	103308	84117.9	50329	44206.7	16483.5	24	24	24	1
XP_753506.1	Aspergillus fumigatus Af293	quinone oxidoreductase, putative	18	0.0471428	0.0901697	1.06648	0.915693	0.952545	0.99172	0.0950244	0.420703	0.916156	0.832202	0.97704	0.985215	217567	227722	214640	232909	229879	240921	223352	249169	248494	209599	249414	258022	403	403	403	1
XP_750972.1	Aspergillus fumigatus Af293	conserved hypothetical protein	7	0.20534	0.28518	1.0516	0.0016669	0.05076	1.26997	0.0951378	0.420702	1.08115	0.0184859	0.729682	0.895246	197401	176002	186415	195451	195257	197357	168831	171576	176919	214269	211407	231735	28	28	28	1
XP_754231.1	Aspergillus fumigatus Af293	conserved hypothetical protein	5	0.223889	0.307379	0.855958	0.490635	0.648821	1.40275	0.0954598	0.421486	2.02548	0.549963	0.914213	1.23595	32973.2	37779.7	32643.2	25070.8	28986.1	35092.3	12656.4	11986	32258.6	12902	29859.7	35061.4	41	41	41	1
XP_754599.1	Aspergillus fumigatus Af293	conserved hypothetical protein	2	0.000504597	0.0349538	5.00795	0.916484	0.952408	1.05732	0.0955091	0.421193	0.52826	0.101572	0.711281	2.50209	22107	19983.5	19412.5	84772.8	138336	91848.2	21896.8	46678.2	56917.3	21831.4	87413.8	36032.3	5	5	5	0.999
XP_755016.2	Aspergillus fumigatus Af293	oxysterol binding protein (Osh3), putative	27	0.680488	0.799523	1.0249	0.240779	0.367263	0.893885	0.0957132	0.421995	0.893742	0.785435	0.968712	1.02474	122809	138698	144956	132727	144690	138413	147312	151398	155074	158472	127107	122637	184	174	184	1
XP_754849.1	Aspergillus fumigatus Af293	ABC1 domain protein	10	0.138465	0.205176	1.11219	0.107784	0.19996	1.07664	0.0958005	0.421728	0.881941	0.057331	0.663189	0.911064	66972.4	71093	58644.3	73192.1	73473	71432.1	75682	73053.1	73620.5	75096.4	84502.2	80048.2	75	75	75	1
XP_755328.1	Aspergillus fumigatus Af293	mitochondrial Hsp70 chaperone (Ssc70), putative	59	0.371423	0.485428	1.02407	0.012051	0.0705958	1.117	0.0959663	0.422233	1.06398	0.274321	0.783021	0.975461	3200723	3428261	3436988	3412831	3431077	3458987	3197048	3211510	3049611	3648601	3415661	3501575	3752	3752	3793	1
XP_747307.1	Aspergillus fumigatus Af293	beta-N-acetylhexosaminidase NagA, putative	7	0.0439889	0.0855755	1.48056	0.310162	0.44912	0.590153	0.095978	0.421848	0.722365	0.256498	0.782481	1.81225	30972.8	42292.7	36121.2	56695.1	44009.3	61545.7	41428.6	48447	62542	33917.9	58344.6	13037.7	29	29	29	1
XP_748908.1	Aspergillus fumigatus Af293	non-repetitive nucleoporin, putative	55	0.0371195	0.0770594	1.06713	0.137245	0.242581	1.06328	0.0960232	0.421552	0.967557	0.462658	0.886617	0.971063	259360	269028	261949	280476	290349	272746	275837	274392	266602	284632	277055	307597	745	745	745	1
XP_754624.1	Aspergillus fumigatus Af293	Phospholipid:diacylglycerol acyltransferase, putative	12	0.00322849	0.0377306	1.20746	0.0340637	0.110994	1.25712	0.0962927	0.422116	0.938246	0.22463	0.758187	0.901182	51539.6	51295.4	50271.8	58329.7	62347.8	64335	54572	57037.4	51696.8	66106.2	62208.7	77737.1	75	75	75	1
XP_755452.1	Aspergillus fumigatus Af293	Pol II transcription elongation factor subunit Cdc73, putative	23	0.0272331	0.0644853	1.10043	0.057228	0.139535	1.05083	0.096423	0.422113	0.954312	0.981412	0.996378	0.999356	195412	209124	198757	228892	220937	214023	213290	210613	208041	229098	218206	216925	268	268	268	1
XP_747652.1	Aspergillus fumigatus Af293	ribosomal large subunit biogenesis protein MAK16, putative	6	0.00977311	0.0416115	1.12385	0.349164	0.497154	1.04468	0.0965643	0.422321	0.935569	0.871015	0.987241	1.00647	123304	130267	121811	144580	137834	139367	131778	139806	129689	130399	145016	144056	53	53	53	1
XP_749949.1	Aspergillus fumigatus Af293	ribosome biogenesis protein Rsa4, putative	17	0.598005	0.730201	0.974604	0.129948	0.233032	0.906819	0.0967227	0.422297	0.94027	0.873926	0.987007	1.01056	58231.2	60739.3	62214.9	60488.2	62000.1	54317.8	61720.4	66275.4	64711.4	60361.8	53045.2	61647.5	125	125	125	1
XP_752916.1	Aspergillus fumigatus Af293	MFS multidrug transporter, putative	4	0.799308	0.882281	0.711626	0.143525	0.250164	0.163845	0.0969852	0.423324	0.126324	0.663829	0.940472	0.54866	138974	14081.9	22885.2	201883	9890.74	8083.08	632877	459705	76365.7	26915.1	201733	17997.9	5	5	5	1
XP_754944.1	Aspergillus fumigatus Af293	dihydrofolate reductase	12	0.103342	0.163531	1.09006	0.231937	0.357433	0.816553	0.0969866	0.422783	0.896957	0.270351	0.784079	1.19739	395556	449782	414682	461637	467624	442664	455254	499882	449250	451094	426802	289114	174	174	174	1
XP_731532.1	Aspergillus fumigatus Af293	NmrA-like family protein	2	0.0800312	0.133162	0.231084	0.870342	0.927939	0.907926	0.0971392	0.422743	3.82166	0.963108	0.994836	0.972685	26450.8	163165	135497	16464	14001.5	31303.9	34405.3	16633.6	18307.5	52428.1	9520.03	15710.4	6	6	6	0.9971
XP_751176.1	Aspergillus fumigatus Af293	spindle pole body component, putative	30	0.0010902	0.0347302	0.865783	0.139868	0.244412	0.918763	0.097223	0.422357	1.09418	0.304349	0.793239	1.03108	332280	344592	328014	295014	287522	287354	294632	294067	330910	294895	271773	277442	293	293	293	1
XP_754525.1	Aspergillus fumigatus Af293	peroxisomal membrane protein receptor Pex19, putative	13	0.00140444	0.0381241	0.711039	0.000543911	0.0503415	0.707609	0.0975527	0.423169	1.08643	0.0911648	0.696436	1.0917	125487	142522	130806	98541.6	92800.5	91964.2	124278	121614	120705	80960.4	90027.8	88681.5	111	111	111	1
XP_756029.1	Aspergillus fumigatus Af293	actin monomer binding protein, putative	14	0.917394	0.957672	1.00841	0.0158527	0.0782643	0.75131	0.0975952	0.422875	0.851645	0.138813	0.725482	1.14308	327978	391963	417881	364782	393878	383411	429317	444092	456159	351175	361759	290323	335	335	335	1
XP_750884.1	Aspergillus fumigatus Af293	conserved hypothetical protein	8	0.000368306	0.0289231	0.809346	0.218721	0.34334	0.890275	0.0976378	0.422485	1.06563	0.699412	0.93778	0.968761	140496	145695	140001	117083	111827	116038	140552	130363	129250	103732	119756	134519	87	87	87	1
XP_748152.1	Aspergillus fumigatus Af293	heat shock transcription factor Hsf1, putative	8	0.206803	0.286945	0.925316	0.326059	0.469068	0.963144	0.0979203	0.422939	1.12652	0.0420421	0.696449	1.08228	54314.1	59950.1	51074.4	52466.2	51499.6	48763.3	46102.4	49494.4	50981.1	48309.9	45803.4	46970.8	46	46	52	1
XP_749119.1	Aspergillus fumigatus Af293	condensin complex component cnd2	13	0.00923559	0.0422051	0.880621	0.0831563	0.171613	0.842692	0.0980057	0.422728	1.04501	0.314077	0.804352	1.09204	82637.8	85838.9	88512.3	77181	76377.2	72737.8	81919.4	81248.4	82662.5	76061.1	72551.1	59663.8	121	121	121	1
XP_749097.1	Aspergillus fumigatus Af293	protein kinase C substrate, putative	27	0.036964	0.0768594	1.11431	0.160238	0.272617	1.0835	0.0982289	0.423124	0.946584	0.635627	0.935252	0.973498	411825	428856	449397	469154	502802	465539	454154	450701	457177	539205	475409	464346	370	370	370	1
XP_755727.2	Aspergillus fumigatus Af293	conserved hypothetical protein	7	0.516292	0.651232	1.05375	0.0306861	0.105863	1.58523	0.0983504	0.423125	1.24832	0.196878	0.757743	0.829801	89501.9	72356.9	83743.6	89158	79578	89438.5	60102	60261.3	76975.9	87352	98782.2	128708	77	77	77	1
XP_753375.1	Aspergillus fumigatus Af293	Kelch repeat protein	12	0.803917	0.885731	1.01705	0.375591	0.527546	0.908213	0.0984157	0.423101	0.850039	0.603685	0.935317	0.951905	43395.1	44111	37177.8	39915.1	41919.9	44744.5	46579.6	45945.2	54140.1	37661.5	48486.1	47533.7	80	80	80	1
XP_755406.1	Aspergillus fumigatus Af293	DNA polymerase alpha catalytic subunit, putative	28	0.743607	0.848706	0.989665	0.0484023	0.128767	0.81869	0.0984612	0.422663	0.903733	0.22103	0.759479	1.09247	110483	117575	110910	114955	107090	113440	116039	134521	125044	101019	113592	93339.6	152	152	152	1
XP_755287.1	Aspergillus fumigatus Af293	DUF833 domain protein	13	0.663068	0.786769	1.02378	0.249884	0.379737	0.94345	0.0986119	0.422801	0.911196	0.83239	0.977051	0.988779	73441.7	71687.4	79210.1	81118.7	70862	77848.4	84259.8	84922.1	77035.3	81368.5	73359.8	77548.3	106	106	106	1
XP_750536.1	Aspergillus fumigatus Af293	proteasome component Prs3, putative	16	0.00597603	0.0403252	1.10138	0.00436088	0.0559818	1.1269	0.0992161	0.425857	0.97232	0.101444	0.712224	0.950296	571244	554449	557599	630680	599219	624334	571953	571291	587975	654775	628166	668450	378	378	378	1
XP_752889.1	Aspergillus fumigatus Af293	Hsp70 family protein	16	0.0304427	0.0680128	0.856667	0.00681312	0.0584384	0.878658	0.0995625	0.425905	1.09375	0.124212	0.706513	1.06637	161204	183270	163267	147027	138185	149260	151527	156352	155602	135406	141470	130548	182	182	182	1
XP_749520.1	Aspergillus fumigatus Af293	heme/steroid binding protein, putative	3	0.451635	0.584559	1.26967	0.00262491	0.0591831	0.370312	0.0995935	0.425526	0.556723	0.0192599	0.718174	1.90881	16843.9	38266.7	33903.1	38555.9	27547	42112.6	42842.3	60240.6	49071	15620.2	18005.1	22867	15	15	15	0.9924
XP_755912.1	Aspergillus fumigatus Af293	cell wall biogenesis protein/glutathione transferase (Gto1), putative	20	0.00850769	0.0405078	1.37501	0.0293332	0.102022	1.35495	0.0998375	0.426832	0.918892	0.544245	0.915773	0.932493	197796	180907	192294	266202	233674	287564	195322	210856	215333	245220	329666	272892	229	229	229	1
XP_746654.1	Aspergillus fumigatus Af293	FGGY-family carbohydrate kinase, putative	33	0.787045	0.873959	1.013	0.138144	0.242885	0.871173	0.0998769	0.426428	0.932593	0.371396	0.842444	1.08442	581002	612277	639607	662885	602235	592462	644483	642351	677608	608077	618176	493407	911	911	911	1
XP_755706.2	Aspergillus fumigatus Af293	NEDD8 activating enzyme (UbaC), putative	12	0.276421	0.368353	0.913966	0.00699714	0.05852	0.751276	0.100145	0.427585	0.867869	0.429639	0.872453	1.05581	81288.9	100733	97316.3	86671.7	87273.5	80430.1	106587	106653	107238	73475.3	89055.9	78998.8	149	149	149	1
XP_752897.1	Aspergillus fumigatus Af293	polysaccharide deacetylase family protein	13	0.247655	0.333484	0.947206	0.305772	0.443026	0.953481	0.100355	0.427625	0.913369	0.0627937	0.669023	0.907358	81399.2	72378.4	76433.1	70837	75759.8	71309.1	88279	81206	82437.8	76702.2	78497	85083.9	85	85	85	1
XP_754182.1	Aspergillus fumigatus Af293	cytochrome c oxidase family protein	2	0.215741	0.297727	0.740852	0.094448	0.18437	14.9193	0.100714	0.428963	13.6916	0.187551	0.758593	0.679888	1758782	1120630	1232805	1104095	1210213	739426	22893	37035.4	1116574	1508095	1039591	2005210	36	36	36	1
XP_755058.1	Aspergillus fumigatus Af293	DEAD-box RNA helicase Dhh1/Vad1, putative	37	0.962714	0.981735	1.00132	0.254488	0.383183	1.0837	0.100762	0.428837	1.11595	0.498345	0.901483	1.03111	484805	524653	505034	509413	514597	491977	495103	425232	439046	484761	526605	460838	673	673	673	1
XP_749966.1	Aspergillus fumigatus Af293	conserved hypothetical protein	3	0.101792	0.161656	0.396119	0.97326	0.984495	1.03056	0.10081	0.428398	4.27036	0.49525	0.89966	1.64141	100879	118092	126572	79436.9	60833.9	19394	8371.72	26215	88226.9	75253.2	16777.1	16785.8	18	18	18	1
XP_748359.1	Aspergillus fumigatus Af293	phosphoketolase, putative	12	0.0771517	0.128344	0.413244	0.00478709	0.0540168	0.392306	0.100944	0.428631	0.780988	0.644193	0.936564	0.822671	57848.6	53054.2	43946.6	35057.1	10434.3	26020.6	71892.6	70859.6	55580.4	24910.7	33474.3	20501.4	38	38	38	1
XP_750435.1	Aspergillus fumigatus Af293	protein phophatase 2C family protein	20	0.0385417	0.079106	1.09533	0.00374166	0.0605503	1.14231	0.101005	0.428253	1.05724	0.63125	0.93714	1.01376	217075	229049	233267	237839	252730	253566	218067	216496	207889	249599	236896	247413	282	282	282	1
XP_755678.1	Aspergillus fumigatus Af293	dynactin, putative	28	0.29822	0.394043	1.10016	0.404315	0.559175	1.3205	0.101418	0.429432	1.1723	0.941061	0.993296	0.976692	176207	169528	149729	203528	163859	178587	125646	150879	146444	280668	216212	105341	105	105	105	1
XP_755665.1	Aspergillus fumigatus Af293	mitochondrial membrane fission protein (Fis1), putative	7	0.289874	0.384268	1.05153	0.0985616	0.188623	1.16081	0.101509	0.429356	1.07357	0.723836	0.952862	0.972495	225824	204037	204775	231573	222591	212824	195288	197032	198178	229572	202138	257033	84	84	84	1
XP_751485.1	Aspergillus fumigatus Af293	SNF2 family helicase/ATPase, putative	52	0.502532	0.637484	0.988238	0.784251	0.874695	0.991788	0.102012	0.430902	0.962199	0.191408	0.756335	0.958754	116842	110916	114618	113604	111625	113050	116289	120252	119240	111740	119391	121935	538	534	538	1
XP_747798.1	Aspergillus fumigatus Af293	conserved hypothetical protein	5	0.398333	0.51923	1.11086	0.0212575	0.0879677	0.857502	0.102109	0.430835	0.830018	0.41447	0.865031	1.07526	83900.9	91157.1	112161	106937	92899.6	118369	115738	110545	117253	104615	98504.8	91789.2	39	39	39	1
XP_753857.1	Aspergillus fumigatus Af293	PAP/25A associated domain family	6	0.0142652	0.0484129	0.680182	0.286017	0.419727	0.844322	0.102141	0.430303	1.20158	0.829325	0.978366	0.967992	26294.6	24408.1	21542.4	15583.3	14837.8	18816.7	22076.2	17702	20393.2	13231.5	19227	18855.3	10	10	10	1
XP_755943.1	Aspergillus fumigatus Af293	nuclear cohesin complex subunit (Psc3), putative	36	0.122661	0.187673	1.04589	0.0145113	0.0766791	0.936257	0.102165	0.43001	0.950348	0.0135965	0.716492	1.06164	720092	770787	725764	769682	784558	763212	794204	767383	770062	733046	738838	711172	352	352	352	1
XP_752543.1	Aspergillus fumigatus Af293	COPII-coated vesicle protein SurF4/Erv29, putative	10	0.0802686	0.133362	1.10256	0.075531	0.160825	0.869783	0.102342	0.430071	0.927114	0.0607861	0.67113	1.17524	241755	272038	254667	279998	271619	295170	276413	280987	270605	265286	239785	217408	158	158	158	1
XP_752346.1	Aspergillus fumigatus Af293	histone transcription regulator Hir1, putative	13	0.118968	0.181741	0.879922	0.0116232	0.0692394	0.841767	0.102353	0.429543	0.915278	0.520598	0.909041	0.956765	44969.7	43205.8	41895.4	36721.9	35126.8	42992.9	46887.5	50666.8	44687.8	38839.7	40051.7	40705.1	93	93	93	1
XP_750007.1	Aspergillus fumigatus Af293	aspartyl-tRNA synthetase, cytoplasmic	45	0.262973	0.352653	1.04351	0.387925	0.54173	0.931575	0.102406	0.429389	0.867557	0.547786	0.914878	0.971799	119476	127614	125204	128992	123932	135688	128777	141192	160789	126463	142330	131310	502	502	502	1
XP_752750.1	Aspergillus fumigatus Af293	MFS multidrug transporter, putative	4	0.43545	0.564395	1.58679	0.0475892	0.129058	1.85872	0.10278	0.430539	0.476044	0.119908	0.709719	0.406398	11313.4	26813.9	12114.5	16695.4	60699.8	14488.7	44610.1	21391.3	35698.3	62546.4	56976.3	61385	21	21	21	1
XP_749140.1	Aspergillus fumigatus Af293	SacI domain and endonuclease/exonuclease/phosphatase family protein	8	0.60042	0.731427	0.676945	0.966085	0.980651	1.02394	0.102969	0.430663	2.56785	0.512968	0.906763	1.69766	66338.2	99602.7	67572.8	61515.4	151035	14907.6	30463.5	61705.2	14028	20782.8	55145.2	24700.5	16	16	16	1
XP_751621.1	Aspergillus fumigatus Af293	RWD domain protein (Gir2), putative	8	0.308607	0.407936	0.895971	0.0569161	0.1395	0.798546	0.103021	0.430362	0.905534	0.899199	0.991732	1.01601	205519	197769	228470	171936	222639	174483	240266	225054	231285	183248	161594	215060	91	91	91	1
XP_751587.1	Aspergillus fumigatus Af293	sulfate transporter family protein	14	0.113548	0.175563	1.12051	0.180253	0.300335	1.0835	0.103032	0.429929	0.95046	0.820267	0.976817	0.982929	248950	245969	256195	254814	308323	280923	253355	264971	272166	309072	284118	264662	110	110	110	1
XP_754082.1	Aspergillus fumigatus Af293	Rheb small monomeric	10	0.339221	0.441902	0.949934	0.00333036	0.0574023	0.835995	0.103185	0.430229	0.923006	0.301221	0.79295	1.0488	257843	287434	266434	269734	240090	261368	281172	298136	299559	235314	248085	251323	108	108	108	1
XP_753364.1	Aspergillus fumigatus Af293	microfibrillar-associated protein MfaP1, putative	7	0.209181	0.289546	0.736872	0.494656	0.652479	1.14848	0.103375	0.430884	1.72017	0.360875	0.837371	1.10367	39082.2	79018.3	55982.1	39456.8	41987.4	41753.1	33070.5	42178.2	24351	30846.5	40620.6	41063.8	29	29	29	1
XP_754609.1	Aspergillus fumigatus Af293	electron transfer flavoprotein-ubiquinone oxidoreductase	19	0.369533	0.482844	1.07179	0.0107546	0.068389	0.820636	0.103549	0.43108	0.865731	0.0487381	0.669152	1.13068	221803	269411	272836	279388	265660	270441	289899	287428	301550	260543	234449	227331	255	255	255	1
XP_747835.1	Aspergillus fumigatus Af293	ubiquitin conjugating enzyme (UbcM), putative	8	3.08702e-05	0.0488	1.10144	0.723088	0.834164	0.973846	0.10382	0.43164	0.927126	0.472028	0.889785	1.0486	394950	399757	397508	435605	437394	440152	429731	455525	402308	382955	468193	405663	335	335	335	1
XP_751930.1	Aspergillus fumigatus Af293	conserved hypothetical protein	16	0.97874	0.990082	1.00055	0.0441099	0.125706	1.07019	0.103852	0.431117	1.04231	0.325531	0.808022	0.974487	239851	251150	237402	240859	240648	247132	233276	236521	228891	257087	239221	251691	259	259	259	1
XP_746480.1	Aspergillus fumigatus Af293	bZIP transcription factor, putative	5	0.0333408	0.0716029	0.804214	0.81675	0.895104	1.03574	0.103924	0.430739	1.19151	0.591564	0.932069	0.92516	458080	402484	415259	369092	352387	306174	370006	309034	395825	292798	389604	440841	42	42	42	1
XP_751767.1	Aspergillus fumigatus Af293	geranylgeranyl transferae type II alpha subunit, putative	9	0.0367966	0.0772743	1.37513	0.840033	0.911323	1.0186	0.103962	0.430218	0.819348	0.346894	0.828092	1.10613	45103.1	55122.7	62426.1	69823.3	72176.2	80082.7	65400.7	66552.4	64826.4	64636.6	78508.4	58764.7	59	59	59	1
XP_752079.1	Aspergillus fumigatus Af293	cytoskeleton organisation protein (Dec1), putative	43	0.00231407	0.035875	1.09617	0.792716	0.87975	1.01157	0.104281	0.431724	0.956814	0.389929	0.853872	1.03683	737176	738646	710159	793366	798967	803505	781993	764666	738255	794901	804009	714978	469	469	469	1
XP_749135.1	Aspergillus fumigatus Af293	conserved hypothetical protein	9	0.132308	0.197561	1.06087	0.021648	0.0875527	1.21783	0.104399	0.431295	1.10637	0.402374	0.856961	0.963771	391772	396853	389277	441606	397783	411363	322438	373173	371423	428666	416074	452579	156	156	156	1
XP_751852.1	Aspergillus fumigatus Af293	t-complex protein 1, theta subunit, putative	36	0.605778	0.73548	0.978295	0.159991	0.272004	1.09105	0.10495	0.433298	1.11104	0.928145	0.991152	0.99622	950761	854028	870208	863572	907063	844578	745024	817029	846388	865074	830792	931033	735	735	735	1
XP_752707.1	Aspergillus fumigatus Af293	aflatoxin B1-aldehyde reductase	7	0.0734653	0.124615	1.19209	0.480567	0.638711	1.06158	0.105045	0.433277	0.874994	0.845265	0.983443	0.982569	40508.8	38877.9	35295.5	43595.5	42145.7	51251.1	45162	46421.5	39578.9	41372.2	50534.6	47480.2	44	44	44	1
XP_750367.1	Aspergillus fumigatus Af293	trimethyllysine dioxygenase TmlH, putative	13	0.0113083	0.0455793	0.879963	0.788384	0.877017	1.03526	0.10506	0.432756	1.26071	0.282293	0.788222	1.07159	138588	137508	131684	114071	123377	121498	118696	86582.6	121864	106246	123392	105998	128	128	128	1
XP_755443.1	Aspergillus fumigatus Af293	AMFR protein, putative	6	0.990947	0.995384	1.00168	0.121712	0.223365	0.692642	0.105125	0.432471	0.718038	0.836625	0.978783	1.03841	57750.7	83024.4	80512	74151.9	63397.3	82531.6	117043	108567	82061.4	54870.8	67906.9	92993.4	41	41	41	1
XP_751088.1	Aspergillus fumigatus Af293	HET domain protein	7	0.0484118	0.091845	0.475827	0.567521	0.717446	0.828546	0.105165	0.431952	0.790971	0.110151	0.708196	0.454248	35885.9	40082.9	32572.9	11345.9	16160.8	27528.8	38826.4	53945.5	45203.8	22167.2	59300.6	40967.2	14	14	14	1
XP_749447.1	Aspergillus fumigatus Af293	cell wall glucanase (Utr2), putative	8	0.668912	0.791384	1.01902	0.012697	0.0727133	1.1653	0.105168	0.431434	1.0893	0.243056	0.773567	0.952562	753637	710784	659642	723828	702174	735662	640962	639171	667292	803134	717400	750808	309	309	309	1
XP_751507.1	Aspergillus fumigatus Af293	conserved hypothetical protein	6	0.0386737	0.0790696	1.17079	0.0856802	0.174902	1.11827	0.105219	0.431205	0.892749	0.220746	0.760668	0.934684	47192.2	50584.4	44353.9	57371.4	57411.4	51590.1	51956.3	57123.3	50139.4	62486.1	56290.7	59162.4	45	45	45	1
XP_751160.1	Aspergillus fumigatus Af293	MAP kinase MpkB	17	0.698356	0.813846	1.02352	0.292077	0.42697	0.872923	0.105245	0.431005	0.88841	0.733067	0.953897	1.04168	257838	310426	273324	291266	286762	280843	320617	305865	318146	258569	340923	235417	306	306	306	1
XP_754058.1	Aspergillus fumigatus Af293	Golgi	6	0.0278943	0.0652045	0.880208	0.0838538	0.172495	1.33361	0.105262	0.43049	1.18288	0.0753996	0.685644	0.780724	168611	158690	170578	140458	142927	155044	161106	123323	138797	177882	162405	226407	78	78	78	1
XP_755019.1	Aspergillus fumigatus Af293	conserved hypothetical protein	6	0.0209742	0.0575591	0.82607	0.184394	0.306423	0.906228	0.10533	0.430291	1.09774	0.992791	0.998376	1.00064	77043	87098.4	79906.3	71747.4	63189.9	66668.5	76027.9	70257.8	75885.6	60002.7	71138.5	70674.6	38	38	38	1
XP_753113.1	Aspergillus fumigatus Af293	high affinity nitrate transporter NrtB	8	0.151508	0.221028	1.12415	0.0265991	0.0985491	1.36656	0.105794	0.431766	1.20909	0.938742	0.992328	0.994615	377020	407567	327331	409235	428427	407543	347522	285018	287291	404503	380466	471869	71	71	71	1
XP_755333.2	Aspergillus fumigatus Af293	DEAD/DEAH box RNA helicase (Ski2), putative	19	0.130451	0.196517	1.20146	0.516453	0.672891	0.900946	0.1058	0.431252	0.817889	0.586098	0.928778	1.0907	94451.5	117461	105716	116015	119620	146572	147153	127481	114273	113972	146090	94152.8	101	101	101	1
XP_755263.1	Aspergillus fumigatus Af293	antigenic mitochondrial protein HSP60, putative	58	0.0660667	0.114967	1.05814	0.0582811	0.140918	1.15558	0.105842	0.431011	1.06426	0.64182	0.936367	0.974528	3181834	3272375	3380892	3382636	3552212	3470966	3143766	3165822	2934187	3927952	3385723	3388472	3222	3222	3222	1
XP_752685.1	Aspergillus fumigatus Af293	Smr domain protein	4	0.504556	0.639225	0.933003	0.0226506	0.0896478	0.685389	0.105994	0.431335	0.795925	0.418229	0.866072	1.08347	108873	101790	119180	101190	89214.5	118824	112918	152658	151960	88650.1	98163	96916.1	30	30	30	1
XP_750126.1	Aspergillus fumigatus Af293	DUF726 domain protein	6	0.785775	0.874282	1.01923	0.0363317	0.113414	0.661545	0.106435	0.432612	0.827727	0.107304	0.701907	1.27527	48074.1	53392.6	54529.3	48403.3	52705.9	58091	57606.3	73946.3	57939.6	43550.4	48350.6	33934.8	42	42	42	1
XP_750660.1	Aspergillus fumigatus Af293	mRNA cap methyltransferase	7	0.0732777	0.12423	1.15204	0.960645	0.977136	0.994177	0.106452	0.432242	0.881124	0.859085	0.984933	1.02104	53233.1	59379.3	49716.4	63804	58827.9	64016.4	57421.8	63143.8	63357.8	51059.3	59941.2	73756	22	22	22	1
XP_750238.1	Aspergillus fumigatus Af293	translocon protein Sec61beta, putative	6	7.15076e-05	0.02275	2.38593	0.000878482	0.0419375	3.19031	0.106462	0.43173	1.30399	0.683191	0.937619	0.975207	492566	450185	470223	1041612	1214436	1119567	459341	339233	301792	1147427	1083821	1227884	142	142	142	1
XP_753398.1	Aspergillus fumigatus Af293	N-acetylglucosaminyl-phosphatidylinositol deacetylase, putative	5	0.0102526	0.0431905	1.19718	0.632507	0.767097	0.896798	0.10652	0.431508	0.83903	0.595764	0.934713	1.12006	44275.9	44463.9	39594.8	51939.3	50140.4	51357.6	58503.8	45119.7	49995.5	43640.2	65515.6	33291.5	31	31	31	1
XP_751942.1	Aspergillus fumigatus Af293	conserved hypothetical protein	12	0.0357504	0.0746786	1.23538	0.292073	0.427151	0.854507	0.106607	0.431405	0.850782	0.170217	0.766222	1.23	76277.6	93073.2	93625.4	107853	106199	109413	110618	100553	97037.3	91771	105730	69407.4	158	158	158	1
XP_753477.1	Aspergillus fumigatus Af293	RIO1 family protein kinase, putative	15	0.0208953	0.0578628	0.928904	0.0177693	0.0801964	0.818159	0.10682	0.431325	0.926637	0.287766	0.792653	1.05207	125194	129089	123780	120531	114341	116341	132979	145512	129930	119525	104804	109918	142	142	142	1
XP_755394.1	Aspergillus fumigatus Af293	COPI vesicle coat beta' subunit, putative	42	0.00885518	0.0418079	1.13675	0.00536911	0.0538594	1.13137	0.106855	0.431095	1.03684	0.249446	0.773054	1.04177	529227	549071	544327	608049	644226	593126	526161	507994	530902	610212	587036	573669	806	806	806	1
XP_755573.1	Aspergillus fumigatus Af293	conserved hypothetical protein	42	0.080412	0.133742	1.02981	0.792692	0.879992	0.989323	0.1069	0.430753	0.956388	0.901564	0.989967	0.995531	177453	177874	179570	187535	183537	179846	178686	190369	190477	173594	193304	186968	478	478	478	1
XP_751514.1	Aspergillus fumigatus Af293	G-protein comlpex beta subunit CpcB	27	0.000789209	0.0317419	1.24168	0.046453	0.128218	1.12565	0.106902	0.430247	0.952633	0.29996	0.792757	1.05083	3466408	3555421	3461686	4443049	4427053	4152311	3829202	3609728	3570254	4398653	4111723	3891764	2048	2048	2048	1
XP_755239.1	Aspergillus fumigatus Af293	DNA replication licensing factor Mcm4, putative	35	0.00588743	0.0405385	0.824143	6.12402e-05	0.144	0.881655	0.10715	0.431052	1.04005	0.422886	0.869573	0.97221	188699	195156	183609	164784	155478	147730	181615	179736	184116	159912	160791	160189	373	373	373	1
XP_750901.1	Aspergillus fumigatus Af293	zinc-binding oxidoreductase ToxD, putative	17	0.849305	0.914528	1.01425	0.698015	0.81777	1.02325	0.10717	0.430546	1.05549	0.623412	0.93667	1.04621	147216	136453	136776	154460	148571	124922	131445	131937	134734	149518	135259	123785	193	193	193	1
XP_751617.1	Aspergillus fumigatus Af293	RNA methylase family UPF0020 protein	4	0.494129	0.628879	1.29437	0.0427091	0.12423	0.721284	0.107223	0.4306	0.599518	0.79483	0.971277	1.07585	16711.4	36578.8	18590.5	40096.9	18185	33797.3	35537.2	39455.3	37613	32184.6	27646.5	22241.1	21	21	21	1
XP_755089.1	Aspergillus fumigatus Af293	conserved hypothetical protein	2	0.211818	0.292536	1.19345	0.0736858	0.158048	1.28527	0.10723	0.430096	1.10483	0.873552	0.987162	1.0259	104253	104242	102374	129442	147965	98742.3	90942.5	103005	88067.9	112368	144828	107629	40	40	40	1
XP_750572.1	Aspergillus fumigatus Af293	mannosyl-oligosaccharide alpha-1,2-mannosidase	23	0.0243735	0.0624886	1.07103	0.967811	0.981932	1.00176	0.107233	0.429593	0.949227	0.714615	0.948162	1.01487	184842	194168	186750	199045	199862	206997	200301	191136	204693	213494	193564	190634	114	114	114	1
XP_750915.1	Aspergillus fumigatus Af293	aldehyde reductase (AKR1), putative	20	0.0169016	0.0506299	1.16758	0.405435	0.559629	0.933279	0.107331	0.429811	0.865366	0.164544	0.756631	1.08262	615145	675135	664608	743440	737014	801807	663909	784522	817748	749421	703895	656348	469	469	469	1
XP_751222.1	Aspergillus fumigatus Af293	conserved hypothetical protein	10	0.0258462	0.0635587	0.878253	0.0497772	0.130527	0.741752	0.107689	0.430946	0.97099	0.284274	0.7899	1.14968	35234.6	35223.2	34808.1	30642	28974.7	32961.1	36230.1	35248.8	36950.5	27186.2	31996.8	22138.8	42	42	42	1
XP_754903.1	Aspergillus fumigatus Af293	annexin ANXC4	3	0.422003	0.550139	1.47785	0.279838	0.412126	0.60723	0.107886	0.431036	0.316685	0.264901	0.784708	0.770733	25463.8	7484.44	8401.53	25087.2	12858.9	16020.4	53558.3	56369.5	16698.8	21211.2	24340.1	21864	6	6	6	0.9929
XP_755313.1	Aspergillus fumigatus Af293	conserved hypothetical protein	23	0.329731	0.431548	0.980048	0.141868	0.247106	0.941978	0.108145	0.431781	0.961699	0.986852	0.996936	1.00057	199509	199662	203621	195830	203245	191833	212411	212901	201654	201761	186276	202810	235	235	235	1
XP_747797.1	Aspergillus fumigatus Af293	GPI anchored protein, putative	3	0.0747262	0.1252	0.865206	0.922808	0.954736	1.00775	0.108364	0.432116	1.1969	0.539548	0.913103	1.0276	357304	344178	295270	284055	295425	280253	271773	249758	311988	265987	300210	271420	47	47	47	0.9999
XP_751998.1	Aspergillus fumigatus Af293	glutaminyl cyclase, putative	5	0.697484	0.813607	0.973827	0.483042	0.641235	0.463143	0.108707	0.433095	1.1929	0.407692	0.861103	2.50825	488087	455408	398268	440490	415969	446191	362856	341837	420443	490302	446209	23681.2	23	23	23	1
XP_755053.1	Aspergillus fumigatus Af293	cystathionine gamma-synthase, putative	20	0.984033	0.993227	1.00063	0.0421689	0.12404	0.852241	0.108834	0.433381	0.926972	0.162797	0.756726	1.08837	223786	242559	230769	240840	228308	228242	258390	257121	236708	227032	219858	195022	273	273	273	1
XP_755447.1	Aspergillus fumigatus Af293	50S ribosomal protein L4	10	0.143677	0.212054	1.07598	0.667526	0.7953	1.02625	0.108851	0.433116	0.897857	0.249719	0.772873	0.941367	291350	268920	286543	292770	323624	295171	297493	344535	302619	329255	303146	335876	167	167	167	1
XP_749284.1	Aspergillus fumigatus Af293	60S ribosomal subunit biogenesis protein Nop16, putative	10	0.0472825	0.0902478	0.943054	0.92122	0.954441	1.00367	0.109194	0.433882	1.07421	0.675179	0.938851	1.00934	167265	178823	170617	164301	161701	161104	152049	161350	167814	164652	154686	163431	122	122	122	1
XP_747911.2	Aspergillus fumigatus Af293	secretion related	14	0.946225	0.972358	0.997249	0.0422193	0.124107	1.20194	0.109289	0.433686	1.14997	0.16042	0.750383	0.954132	1373093	1214670	1253182	1293184	1284586	1247843	1101336	1011971	1233162	1403550	1293239	1314774	393	335	393	1
XP_752513.1	Aspergillus fumigatus Af293	conserved hypothetical protein	5	0.0188819	0.0548261	1.12206	0.000767838	0.0414286	1.27218	0.109727	0.435585	1.07312	0.0527885	0.67531	0.946488	753557	731953	695047	840002	787418	818791	679047	705798	647275	866336	848659	868748	96	96	96	1
XP_747916.1	Aspergillus fumigatus Af293	AMP-binding enzyme, putative	23	0.00356363	0.0368476	0.851293	0.0698391	0.153939	0.851729	0.109861	0.436023	0.950989	0.484336	0.897534	0.950502	106351	103200	98965.7	89798.9	85018.7	87772.7	109106	105372	109851	83728.1	89619.8	103994	271	271	271	1
XP_750434.1	Aspergillus fumigatus Af293	Nulp1-pending protein	10	0.90107	0.947597	1.00715	0.0835052	0.172086	0.758478	0.109894	0.435521	0.862851	0.286093	0.791966	1.14575	55115.8	63941.7	64404.4	63559	61002.7	59804.5	70409.2	77387.1	64844.1	56077.7	63090.1	43575.7	50	50	50	1
XP_746655.1	Aspergillus fumigatus Af293	conserved hypothetical protein	8	0.195567	0.272714	1.13842	0.0402262	0.120813	1.37491	0.109987	0.43543	1.25852	0.613886	0.934933	1.04205	120039	146220	158637	162330	161579	156624	130085	104293	102961	178195	145087	140429	93	93	93	1
XP_747851.1	Aspergillus fumigatus Af293	conserved hypothetical protein	16	0.245353	0.331997	1.09085	0.22462	0.350063	1.08648	0.110114	0.435339	0.888836	0.150548	0.73636	0.892414	775866	818336	876348	862242	997142	840051	852573	997825	931419	1012763	942110	1065084	313	313	313	1
XP_751118.1	Aspergillus fumigatus Af293	1,3-beta-glucan synthase catalytic subunit FksP	60	0.0235195	0.0610794	1.07484	0.71679	0.829045	0.99427	0.110169	0.435275	0.960608	0.0724236	0.688446	1.03845	230094	242037	239347	253390	261355	249932	249749	249990	240852	246404	248320	241563	681	681	681	1
XP_746781.1	Aspergillus fumigatus Af293	SNARE domain protein	12	0.46811	0.602139	1.02522	0.44096	0.596589	0.943102	0.110278	0.434919	0.945011	0.720058	0.950653	1.0273	306816	308766	319171	307533	337814	313632	330053	315626	343927	345649	277156	313717	225	225	225	1
XP_755229.2	Aspergillus fumigatus Af293	isochorismatase family hydrolase, putative	7	0.0851747	0.141015	1.13329	0.772392	0.865538	0.979573	0.110398	0.435021	0.910724	0.515488	0.907948	1.05364	178876	197898	174018	207453	194433	222291	191951	206446	205792	219652	197155	177008	72	72	72	1
XP_755056.1	Aspergillus fumigatus Af293	glutamate carboxypeptidase, putative	29	0.00128289	0.0345693	1.107	3.42278e-05	0.12	1.09688	0.110452	0.434734	0.974395	0.0173343	0.703286	0.983381	1624175	1558689	1577711	1766278	1747349	1755572	1624467	1639453	1621081	1781687	1796529	1780025	852	852	852	1
XP_754768.1	Aspergillus fumigatus Af293	60S ribosomal protein L35Ae	7	0.825916	0.899266	1.0145	0.0697862	0.153846	1.23931	0.110531	0.434539	1.12704	0.41732	0.866128	0.922597	1650970	1962639	1954878	1899875	1937675	1796601	1663762	1663683	1598532	2415962	1842743	1891765	352	352	352	1
XP_754623.1	Aspergillus fumigatus Af293	aureobasidin resistance protein Aur1	2	0.218524	0.300239	3.29356	0.657838	0.788364	0.537055	0.110801	0.435293	0.136163	0.886591	0.987273	0.835037	29884.1	11460.1	11659.5	35092.8	18105.8	224529	345113	247233	18538.2	42576.5	358126	16068.9	29	29	29	0.9991
XP_753502.1	Aspergillus fumigatus Af293	MYB DNA binding protein (Tbf1), putative	11	0.269568	0.360106	1.0691	0.151527	0.260998	0.925801	0.111689	0.438374	0.934572	0.267782	0.783432	1.07923	102915	103823	111883	104665	122253	114164	109123	115335	116364	109861	108674	97338.6	65	65	65	1
XP_746668.1	Aspergillus fumigatus Af293	C-4 methyl sterol oxidase Erg25, putative	6	0.22424	0.307542	0.937713	0.163796	0.277023	0.806984	0.111841	0.439053	0.777141	0.109999	0.709273	0.903036	369587	341564	360373	326148	360940	318641	518832	518902	360022	348961	388896	375342	121	121	121	1
XP_750530.1	Aspergillus fumigatus Af293	methyltransferase, putative	5	0.00770436	0.0404977	1.1931	0.000854958	0.0368254	1.27928	0.111865	0.438555	1.0783	0.835145	0.978159	1.00566	83788	80270.7	88423.6	102014	103076	96054.7	81831.9	76623.2	75649	99926.6	97522	101906	45	45	45	1
XP_748153.1	Aspergillus fumigatus Af293	peptidyl-prolyl cis-trans isomerase, putative	5	0.546758	0.681822	1.52315	0.027208	0.0984929	0.820632	0.111972	0.438402	0.364724	0.393151	0.853041	0.676954	77031.1	26358	14185	20969.7	78833.2	61565.8	86973	88987.5	76701.6	71760.4	71113.2	64287.6	17	17	17	1
XP_748267.1	Aspergillus fumigatus Af293	GNAT family acetyltransferase, putative	8	0.135372	0.20246	0.731712	0.646296	0.779351	1.16704	0.111997	0.437905	1.7423	0.714329	0.948073	1.09239	29585.1	34782.1	48629.9	30892.1	23328.7	27202.8	15174.8	32962.1	18915.8	16907.6	25502.6	34877.8	11	11	11	1
XP_755237.1	Aspergillus fumigatus Af293	secreted dipeptidyl peptidase DppV	24	0.160279	0.232696	1.24967	0.13689	0.242152	1.45716	0.112037	0.437771	1.36796	0.43577	0.879023	1.17317	246530	304155	353574	404135	319897	400221	187289	272106	203222	274892	444074	262501	313	313	313	1
XP_749640.2	Aspergillus fumigatus Af293	ACN9 family domain containing protein, putative	5	0.273309	0.365144	1.2842	0.0453163	0.127715	0.527139	0.112053	0.437276	0.688249	0.0916307	0.698522	1.67669	58631.8	94367.4	106651	115292	92805.2	116800	122854	126234	116711	75579.7	84653.5	41438.8	93	93	93	1
XP_751646.1	Aspergillus fumigatus Af293	glyoxylate reductase	15	0.00370268	0.0360288	1.22233	0.0105512	0.0674707	1.1459	0.112115	0.437053	0.934306	0.914387	0.990349	0.996622	232045	244995	252572	288830	292744	310133	259216	250693	270923	286991	307026	300638	250	211	250	1
XP_754584.1	Aspergillus fumigatus Af293	stress response protein Nst1, putative	7	0.00328908	0.0376	0.808751	0.403997	0.558674	0.805923	0.112553	0.438894	1.24412	0.345316	0.825856	1.24849	31787.9	32134.4	34225.4	26755.2	27410	25217.8	31434.2	26451.8	21833.9	21266.1	14792.3	30209.7	21	21	21	1
XP_755069.1	Aspergillus fumigatus Af293	C2H2 finger domain protein, putative	3	0.296475	0.391531	0.55851	0.800779	0.885132	0.914792	0.112778	0.439779	2.00682	0.691548	0.936898	1.22523	65646.1	52717.6	21566.5	11819.2	30978.5	35513	22555.6	21400.5	19131	14625.3	13141.6	36781.5	17	17	17	1
XP_001481602.1	Aspergillus fumigatus Af293	dsDNA-binding protein PDCD5, putative	3	0.0434608	0.0845466	0.813724	0.401929	0.556688	1.10074	0.112789	0.439284	1.16553	0.20652	0.758199	0.86162	249402	207748	212297	183970	192406	167436	174785	192008	207011	199046	185922	250369	52	52	52	1
XP_755048.1	Aspergillus fumigatus Af293	condensin complex component cnd1	22	0.322855	0.42513	1.07428	0.0922089	0.182043	0.856335	0.112832	0.439204	0.851006	0.27254	0.782989	1.0676	88538	87621.7	73003.6	87777.5	88063.4	90836.8	104431	99462.8	88470.6	79405.9	92056.9	78942.3	115	115	115	1
XP_753962.1	Aspergillus fumigatus Af293	DUF89 domain protein	33	0.0369552	0.0769345	1.07285	0.450995	0.608548	1.04706	0.113515	0.443434	0.963156	0.827261	0.978797	0.986884	442536	432117	426344	465531	481485	449156	443619	463961	443331	523509	441308	453382	599	599	599	1
XP_751564.1	Aspergillus fumigatus Af293	DNA repair protein Rad50	20	0.233651	0.316596	1.05851	0.122233	0.223894	0.907076	0.113582	0.443349	0.928808	0.202438	0.758615	1.08387	64287	65441.5	67722.7	65677.5	74699.6	68874.1	66309.4	72835.4	73623.1	69224	62030.8	61801.4	72	72	72	1
XP_749439.1	Aspergillus fumigatus Af293	ribosomal protein L34 protein, putative	7	0.151012	0.220517	1.11154	0.00933102	0.0645838	1.42584	0.11376	0.443372	1.19657	0.131904	0.720244	0.932801	2510011	2203748	2122611	2579920	2630932	2375535	1725807	1811522	2192092	2815574	2657996	2654541	254	254	254	1
XP_748694.1	Aspergillus fumigatus Af293	protein kinase, putative	5	0.00052105	0.0339104	0.787348	0.345852	0.493221	0.543	0.113849	0.443234	1.05139	0.501853	0.903228	1.52451	76506.9	79260.7	75935.4	62126.4	58494.9	61845.7	72306.4	76569.5	71560.9	12836.6	61854.8	79888.6	42	42	42	1
XP_753589.1	Aspergillus fumigatus Af293	ATP synthase F1, beta subunit, putative	38	0.0207134	0.0578322	1.1829	0.0354301	0.112977	1.29908	0.113895	0.442738	1.10177	0.970583	0.995075	1.00323	7052822	7190394	7259214	8079984	9266278	8138316	7150238	6196314	6212695	9614022	8272844	7587274	4455	4437	4455	1
XP_751893.1	Aspergillus fumigatus Af293	extracellular dipeptidyl-peptidase Dpp4	13	0.0660128	0.115062	1.21162	0.015619	0.0785788	1.28926	0.113936	0.442244	1.17167	0.185177	0.76251	1.10111	52628.9	65319	62744.5	72302.5	68209.4	77793	51161.1	55069.7	47595.8	66684.6	71145.1	60572.2	85	85	85	1
XP_749322.1	Aspergillus fumigatus Af293	chitin synthase A	12	0.000454538	0.0279365	1.19349	0.0145447	0.0765207	1.18588	0.113986	0.441888	0.937762	0.137098	0.727463	0.943784	97011.1	100016	102322	117755	120428	119018	100746	108168	110473	121063	123858	133896	78	78	78	1
XP_754546.1	Aspergillus fumigatus Af293	40S ribosomal protein S7e	15	0.0215663	0.0581931	1.18786	0.62013	0.759508	0.967098	0.114187	0.44231	0.888636	0.165312	0.759482	1.09149	4610573	4975587	4968855	5847426	5342731	6115410	6048128	5293179	5073955	5274374	5588443	4984646	1331	1331	1331	1
XP_750415.1	Aspergillus fumigatus Af293	CBS domain protein	12	0.835481	0.90697	1.01154	0.0109811	0.0682654	0.763825	0.114462	0.443287	0.898674	0.0418916	0.697667	1.19012	121713	137426	137004	138318	124886	137307	136933	153352	150361	122905	104050	110028	156	156	156	1
XP_749752.1	Aspergillus fumigatus Af293	glutamine amidotransferase:cyclase	32	0.0571386	0.104799	0.948639	0.0771101	0.162581	0.926659	0.114794	0.443924	1.04058	0.121603	0.709029	1.06527	735862	718096	701766	684477	697129	663440	675708	709335	686641	648407	667158	605374	646	646	646	1
XP_754435.1	Aspergillus fumigatus Af293	microtubule associated protein EB1, putative	19	0.15231	0.221983	1.07138	0.108264	0.200439	0.870529	0.114978	0.444631	0.905211	0.145829	0.731807	1.11406	742820	826934	814104	827236	840556	884436	875529	934919	823645	811625	803568	681957	548	548	548	1
XP_754009.1	Aspergillus fumigatus Af293	alcohol dehydrogenase, putative	30	0.0984226	0.157833	0.834404	0.0302674	0.104914	0.749271	0.115569	0.446539	0.840543	0.482679	0.89635	0.936046	1539324	1296589	1391064	1331420	1054549	1148753	1850822	1731740	1458656	1140215	1362747	1265653	1110	957	1110	1
XP_752743.1	Aspergillus fumigatus Af293	5'-_3' exoribonculease Dhp1	16	0.166023	0.237653	1.05714	0.153227	0.262694	0.814141	0.115743	0.446718	0.82947	0.392756	0.853434	1.07705	82280.6	85915.6	85804.5	94490.8	88873.1	85333.4	114124	109590	84982.9	73529.9	82766.6	94244.5	122	122	122	1
XP_750818.2	Aspergillus fumigatus Af293	class V chitinase, putative	15	0.0148168	0.0490995	1.15827	0.00136422	0.0476404	1.40446	0.11597	0.447172	1.10128	0.0266312	0.706364	0.908237	87684.2	85909.7	95046.8	99970.9	104944	106047	87478.6	78407.8	78152.8	117653	115286	109484	109	109	109	1
XP_750150.1	Aspergillus fumigatus Af293	TBC domain protein, putative	7	0.768888	0.864339	1.0451	0.123958	0.225719	0.635596	0.11645	0.44881	0.756725	0.402617	0.856785	1.24427	37299.2	35781.9	55338.7	44939.8	42209	44445.6	54636.8	56908.8	54816.8	31354.3	55206.6	25283.3	16	16	16	1
XP_755840.1	Aspergillus fumigatus Af293	26S proteasome regulatory subunit S5A	14	0.99048	0.995603	0.999026	0.0198634	0.0843425	0.853895	0.116516	0.448707	0.856132	0.969333	0.994841	1.00164	214203	273132	263523	246790	244515	254751	282244	290143	300027	259089	256664	230036	292	292	292	1
XP_754580.1	Aspergillus fumigatus Af293	conserved hypothetical protein	13	0.0610194	0.109725	0.918503	0.158224	0.270031	1.08559	0.116874	0.450035	1.08677	0.102935	0.709577	0.919507	618637	646894	583341	577215	568614	551161	535863	574334	590957	584512	661660	601645	165	165	165	1
XP_754761.2	Aspergillus fumigatus Af293	calcium binding modulator protein (Alg2), putative	4	0.0631212	0.11153	1.29853	0.22918	0.354963	0.858412	0.116916	0.44987	0.794623	0.120911	0.711538	1.20204	77821.1	91477.8	67260.4	92218.9	103780	109547	110075	101160	85702.6	85818.2	96049.1	73232.4	68	68	68	1
XP_755656.1	Aspergillus fumigatus Af293	V-type ATPase, B subunit, putative	29	0.0163987	0.0498235	1.14713	0.336272	0.48306	1.05789	0.116988	0.449599	0.931539	0.85253	0.983566	1.01012	659888	738894	678352	786386	801456	792188	727314	751656	748452	857267	785165	719694	984	984	984	1
XP_751799.2	Aspergillus fumigatus Af293	phosphatase-like protein (PTPLA), putative	4	0.000959096	0.033578	5.83678	0.658091	0.788323	0.695107	0.117234	0.450266	0.335488	0.14159	0.724753	2.81708	12673.9	14580.8	16775.2	71057.2	123404	70298.1	98297	53661.8	15564.1	20499.8	15453.9	87035.5	21	21	21	1
XP_754451.1	Aspergillus fumigatus Af293	ubiquitin C-terminal hydrolase, putative	5	0.992386	0.995583	0.995357	0.738878	0.842187	0.937548	0.117553	0.451125	0.540709	0.221519	0.758761	0.574048	13005.6	35790.6	17345.8	14676.5	39811.5	13627	41953.2	32958.4	36938.1	36943.2	44819.8	25420.4	18	18	18	1
XP_752277.1	Aspergillus fumigatus Af293	60S ribosomal protein L9, putative	20	0.00346859	0.0364598	1.14176	0.0501171	0.130236	1.09474	0.11761	0.450766	0.971456	0.735818	0.955189	1.01319	4082970	4260560	4177392	4776148	4905308	4616722	4230268	4339098	4318284	4773326	4923278	4425181	1179	1179	1179	1
XP_753671.1	Aspergillus fumigatus Af293	succinate dehydrogenase cytochrome b560 subunit	7	0.0741758	0.124548	1.17972	0.33426	0.480055	0.926611	0.117737	0.450579	0.866014	0.211772	0.750785	1.10257	560480	630501	696405	759577	698759	761280	728336	677806	767531	611920	749549	657251	176	176	176	1
XP_755204.1	Aspergillus fumigatus Af293	isochorismatase family hydrolase, putative	6	0.015501	0.0496185	1.40068	0.857159	0.92079	0.967892	0.117742	0.450085	0.850209	0.291652	0.793212	1.23038	31183.1	34554.9	26986	39760.4	45903.1	43781.5	39092.4	34593.6	34986.5	39523.1	43017.9	25233	28	28	28	1
XP_753683.1	Aspergillus fumigatus Af293	ankyrin repeat protein (Yar1), putative	5	0.0510657	0.0959865	1.19339	0.726661	0.836459	1.05631	0.118114	0.450875	0.85707	0.828462	0.978487	0.968291	236636	218275	269709	296699	279134	285889	274447	307448	262241	263624	253280	390591	40	40	40	1
XP_748130.1	Aspergillus fumigatus Af293	F-box domain protein	3	0.516679	0.651258	1.2688	0.196548	0.317733	0.648944	0.118124	0.450383	0.557994	0.800478	0.973155	1.09097	12122.7	27867.7	11128.1	17389.5	27264.6	16196.2	28692.2	26469.9	28491.6	10451.2	25806.3	21926.2	16	16	16	1
XP_753044.2	Aspergillus fumigatus Af293	acetyltransferase,	4	0.839993	0.910498	1.05232	0.56861	0.718503	0.86835	0.119101	0.452991	0.612791	0.239808	0.775707	0.74262	54532.6	29731.8	45978.5	49588.2	53553.6	32712.4	77631.7	84923.4	49139.2	44172.9	72174.7	66533.1	25	25	25	1
XP_751850.1	Aspergillus fumigatus Af293	conserved hypothetical protein	7	0.698157	0.813809	0.971392	0.256764	0.384304	0.435434	0.119254	0.45296	0.826563	0.383309	0.854973	1.84395	82129.2	101952	91007.5	91092.7	91892.1	83443.6	122328	115117	95824.8	93272.7	86524.9	13804.3	44	44	44	1
XP_754579.1	Aspergillus fumigatus Af293	dolichol-phosphate mannosyltransferase, putative	14	0.0033089	0.0373016	1.11814	0.99986	0.999828	1.00001	0.119397	0.453076	0.939847	0.493629	0.899875	1.05087	282946	299562	289550	320714	326953	327191	324182	295597	308500	330502	329853	271185	301	301	301	1
XP_748747.1	Aspergillus fumigatus Af293	actin cytoskeleton organization and biogenesis protein, putative	28	0.0304455	0.0679404	0.921192	0.184201	0.306574	0.969565	0.119526	0.453036	1.03844	0.620878	0.935454	0.98663	75572.6	72558.9	71227.6	66689.6	69710.7	65674.5	69601.7	70153.2	71432	67904.4	66379.1	70528.1	177	177	177	1
XP_748095.1	Aspergillus fumigatus Af293	thiamine biosynthesis protein (Nmt1), putative	35	0.0958405	0.15488	0.881815	0.681822	0.807084	0.954568	0.119725	0.453265	1.09775	0.905454	0.991846	1.01409	11498850	10922890	10848750	9952870	10643450	8820096	9768564	11009970	9577308	11612090	9147806	8434380	2389	2389	2389	1
XP_753533.1	Aspergillus fumigatus Af293	ribonuclease P complex subunit Pop4, putative	2	0.388437	0.507842	0.875533	0.598742	0.741192	0.866279	0.119757	0.452773	1.52613	0.0852061	0.701126	1.54243	31087.8	24767.6	29495.2	24824	30456.7	20159.9	21885.2	12392.9	23557.4	18430.7	18865.9	11945.5	15	15	15	0.9991
XP_753486.1	Aspergillus fumigatus Af293	secretory pathway protein Ssp120, putative	9	0.200473	0.278391	1.10052	0.319096	0.461556	0.897659	0.119778	0.452412	0.860262	0.562189	0.918515	1.05467	183814	173116	208990	196792	207181	217408	198914	238295	220378	228717	188290	175451	151	151	151	1
XP_750121.1	Aspergillus fumigatus Af293	C2H2 finger domain protein, putative	17	0.00322257	0.0378852	0.840279	0.0389301	0.119619	0.786587	0.120046	0.452919	0.933537	0.973069	0.995348	0.99726	328512	344695	342200	274308	282268	296919	366497	380408	341628	267243	263065	329718	147	147	147	1
XP_754499.2	Aspergillus fumigatus Af293	vacuolar assembly protein, putative	11	0.246228	0.332707	0.935671	0.550394	0.702485	0.837358	0.120406	0.453563	1.21873	0.297462	0.794561	1.36182	24879.9	29119.9	26841.2	25862	24302.6	25345.2	18784.8	22333.2	25607.1	21429.4	11194.7	26292.2	21	21	21	1
XP_755664.1	Aspergillus fumigatus Af293	RING finger domain protein, putative	7	0.0211362	0.0571339	0.761493	0.130194	0.233305	0.73065	0.120606	0.454071	1.20458	0.214265	0.751905	1.25543	34488.6	32147.2	31110.8	21994.2	24932.3	27775.3	28377.3	22712.8	30618.4	21761.5	15018	23553.3	16	16	16	1
XP_752406.1	Aspergillus fumigatus Af293	conserved hypothetical protein	44	0.176614	0.251164	1.02513	0.802458	0.885973	0.984515	0.120637	0.453581	0.933992	0.602339	0.935223	0.972524	119775	120556	115439	123000	120112	121551	133028	128790	119414	114883	124898	136061	359	359	359	1
XP_749675.1	Aspergillus fumigatus Af293	NADH-ubiquinone oxidoreductase 64 kDa subunit, putative	25	0.0441744	0.0855792	0.961424	0.834832	0.90694	0.983145	0.120792	0.453376	0.942352	0.316685	0.806129	0.921532	163354	163868	158494	153802	154956	158202	162358	177184	176239	194540	159141	155619	247	247	247	1
XP_754812.1	Aspergillus fumigatus Af293	PX domain protein	36	0.802566	0.884506	1.01047	0.341714	0.489621	0.956178	0.120855	0.453216	0.930989	0.729346	0.955708	0.983852	582035	590600	631094	604611	577700	640808	628109	628906	680584	583009	618988	651269	571	571	571	1
XP_750091.2	Aspergillus fumigatus Af293	DNA primase large subunit	12	0.599598	0.730917	0.972054	0.0283455	0.101007	0.848467	0.120947	0.453072	0.886501	0.666025	0.940707	1.01563	69576.6	66521.2	60196.3	61346.8	66721.9	62517.8	76773.2	77189.3	67482.1	59897.5	64186	63534.6	89	89	89	1
XP_753706.1	Aspergillus fumigatus Af293	CipC-like antibiotic response protein, putative	11	0.0290311	0.0669342	0.306414	0.00021243	0.0565217	0.273387	0.121146	0.453346	0.865857	0.937896	0.992913	0.970457	69566.7	73573.1	61815.1	18041.2	40721.3	12389.5	71006.9	84344.7	81380.3	25354.1	18919.6	20761.2	58	58	58	1
XP_755515.1	Aspergillus fumigatus Af293	conserved hypothetical protein	3	0.0120441	0.0459257	0.33659	0.444041	0.600491	0.711876	0.121212	0.45307	0.886154	0.136591	0.729263	0.418992	27735.7	33879.6	29399.9	9727.65	6850.31	15809.1	34828	33041	34499.4	40846.4	31723.3	11052.9	22	22	22	1
XP_748900.1	Aspergillus fumigatus Af293	acyl-CoA dehydrogenasea family protein	9	0.0554984	0.102669	0.803512	0.218429	0.343378	0.792262	0.121573	0.453983	0.915373	0.69061	0.936978	0.928372	56368.3	58960.2	56674.4	46451.7	39900.9	52719.8	59607	60409.7	68199.7	37863.8	50008.9	64494.2	57	57	57	1
XP_754177.1	Aspergillus fumigatus Af293	Ketol-acid reductoisomerase	34	0.417827	0.544546	1.02255	0.0442828	0.126362	0.876731	0.121784	0.454418	0.942616	0.0869928	0.702625	1.09939	3157341	3324389	3305727	3243225	3454262	3311470	3550569	3547655	3288948	3248152	3013535	2852222	2705	2705	2705	1
XP_752354.1	Aspergillus fumigatus Af293	VPS9 domain protein, putative	9	0.461316	0.593068	0.473582	0.731118	0.839699	1.53998	0.121799	0.453931	5.02296	0.743403	0.95799	1.54469	181852	209996	218102	15413.6	215781	265986	20047.5	15775.8	207807	13136.2	228688	79899.1	19	19	19	1
XP_747450.1	Aspergillus fumigatus Af293	hypothetical protein AFUA_8G06490	5	0.496187	0.631064	1.072	0.816477	0.895138	1.1005	0.122067	0.454939	1.38559	0.452643	0.88221	1.3497	28818.4	26107	33415.8	31541.2	28285.5	34714.9	25844.5	23220.4	15748.3	33683.6	32746.2	11420	9	9	9	1
XP_749102.1	Aspergillus fumigatus Af293	conserved hypothetical protein	15	0.0479113	0.0915757	0.875579	0.872624	0.928609	1.0117	0.122487	0.455996	1.09812	0.492828	0.899707	0.950376	192884	209462	184640	174628	161492	177561	189103	173016	172184	172106	166928	203049	235	235	235	1
XP_754223.1	Aspergillus fumigatus Af293	DNA replication licensing factor Mcm2, putative	32	0.177624	0.252392	0.956474	0.0188243	0.0823203	0.854383	0.122601	0.455983	0.941051	0.246084	0.77234	1.0535	140958	148074	138198	139110	131397	138084	156963	144855	152229	122482	137621	128064	355	348	355	1
XP_755524.1	Aspergillus fumigatus Af293	conserved hypothetical protein	2	0.231185	0.313468	1.44169	0.25447	0.383322	1.88443	0.122633	0.45562	1.92512	0.415291	0.865101	1.47282	22272.8	50859.9	43681	54066.4	57369.9	47802.4	15344.6	15278.6	29582.1	62589.4	47350.2	15659.9	20	20	20	0.9991
XP_753340.1	Aspergillus fumigatus Af293	WD repeat-containing protein	11	0.209429	0.289583	0.951945	0.529312	0.686066	0.964857	0.122651	0.45522	0.934693	0.186915	0.760098	0.922185	110040	120247	108912	107816	105566	109227	123461	121591	117562	128802	110118	111764	68	68	68	1
XP_751936.1	Aspergillus fumigatus Af293	possible apospory-associated protein c	17	0.131216	0.19725	1.09027	0.747077	0.84839	0.976685	0.122756	0.455106	0.892517	0.952204	0.99453	0.996316	289741	320661	331997	347684	328335	350182	349560	378541	327872	311852	344580	376154	344	344	344	1
XP_755646.1	Aspergillus fumigatus Af293	meiosis induction protein kinase (Ime2), putative	10	0.373909	0.488319	1.07803	0.293916	0.429074	1.07228	0.122896	0.454733	1.17705	0.0197504	0.700542	1.18336	44743.5	46727.2	36614	45656.7	45910	45753.9	38014.8	36733.2	33615.9	41547.9	35624.4	39101.2	45	45	55	1
XP_750807.2	Aspergillus fumigatus Af293	metallopeptidase family M24, putative	14	0.477232	0.611929	0.977358	0.00571562	0.0561369	1.13381	0.122908	0.454251	1.07012	0.00422503	0.532276	0.922457	189042	177326	193495	182052	186597	178263	181074	174768	167258	199029	197378	196385	156	156	156	1
XP_753345.1	Aspergillus fumigatus Af293	alpha-1,2-mannosyltransferase, putative	3	0.726733	0.832695	1.50633	0.0684371	0.151557	0.337197	0.123115	0.454464	0.258121	0.888137	0.985301	1.15308	15646.9	18179.7	133323	99425.7	9407.21	138587	126084	115846	150977	96186.6	40537.7	21683.5	7	7	7	0.9988
XP_756034.1	Aspergillus fumigatus Af293	50S ribosomal subunit L30	15	0.0163685	0.0498584	1.07445	0.00452328	0.055115	1.17018	0.123433	0.454746	1.0509	0.156715	0.748928	0.964929	339559	355199	339004	371483	375554	363534	322686	341369	319818	386899	370484	393824	248	248	248	1
XP_749538.1	Aspergillus fumigatus Af293	NADH:flavin oxidoreductase/NADH oxidase family protein	14	0.00267728	0.0381308	1.36044	0.479585	0.638003	1.09099	0.123477	0.454265	0.926794	0.275246	0.782001	1.15569	82653.2	90844.4	93169.4	124864	114062	123676	97872.1	96245.9	93291	100253	128852	88338.4	116	116	116	1
XP_751169.1	Aspergillus fumigatus Af293	mitochondrial carrier protein, putative	5	0.835828	0.907076	0.983554	0.0811083	0.169083	1.23246	0.123647	0.454672	1.19554	0.553996	0.91577	0.954088	50309.7	40953.4	42257.4	41532.3	47098.2	42349.6	38819.5	32558.1	40312.9	50866.4	45614.9	41108.9	23	23	23	1
XP_747608.1	Aspergillus fumigatus Af293	imidazoleglycerol-phosphate dehydratase	9	0.0468807	0.0897914	1.15951	0.255384	0.383987	0.915467	0.123758	0.454784	0.872159	0.101172	0.715708	1.10466	310968	314302	356054	359466	397023	380129	407793	381098	337532	322674	366654	340172	149	149	149	1
XP_749971.1	Aspergillus fumigatus Af293	60S ribosome biogenesis protein Brx1, putative	13	0.12642	0.192772	1.1101	0.00424943	0.0569116	1.37946	0.123825	0.454595	1.12446	0.106628	0.706773	0.904891	257567	222454	218818	256541	265732	251590	219778	200464	200150	266019	280234	310508	168	168	168	1
XP_747345.1	Aspergillus fumigatus Af293	ribosome biogenesis protein Noc4, putative	14	0.00377713	0.0352676	1.1101	0.851173	0.916988	0.993807	0.123865	0.454445	0.940803	0.0405895	0.708123	1.0509	82779.8	79173.1	81569.4	88198.9	91643.8	90480.1	91003.2	85458.5	82550.8	84004.1	87636.5	85596	157	157	157	1
XP_751609.1	Aspergillus fumigatus Af293	conserved hypothetical protein	3	0.00478376	0.0379569	1.63797	0.135789	0.240372	1.31286	0.124254	0.455621	0.815142	0.905619	0.9911	1.017	56831.5	59530.7	74103.2	99214.5	109475	101436	67858.8	84076.5	81130.7	131616	87474.5	90977.2	54	54	54	1
XP_749362.1	Aspergillus fumigatus Af293	40S ribosomal protein S14, putative	6	0.0533053	0.0995711	1.14189	0.996771	0.999138	0.999722	0.124262	0.455142	0.887401	0.80982	0.976309	1.0136	123181	134644	131754	154266	154464	136544	158574	149934	131525	153477	148296	137279	74	74	74	1
XP_751586.1	Aspergillus fumigatus Af293	conserved lysine-rich protein, putative	48	0.0248057	0.0625922	0.92527	0.772235	0.865483	0.975509	0.12453	0.456303	1.04508	0.917825	0.988924	0.991262	5096672	5117502	5296154	4685529	4963150	4705382	4792594	4930691	5121211	5451023	4176233	4934943	2183	2183	2183	1
XP_750473.1	Aspergillus fumigatus Af293	SPX domain protein	26	0.439946	0.569772	0.982997	0.198089	0.319679	0.938855	0.124588	0.456294	0.938081	0.598237	0.93502	0.982186	141197	149186	140012	141125	140372	141414	145151	158092	155693	142381	136541	152082	185	185	185	1
XP_750043.1	Aspergillus fumigatus Af293	calmodulin, putative	4	0.314927	0.413899	1.02682	0.85817	0.921349	1.02247	0.125104	0.458034	1.13665	0.251395	0.777624	1.14148	46942.1	46217.1	45944	49662.4	47157.9	46078	35892.8	44689.8	42315.7	49541.2	41238.7	35514.3	28	28	28	1
XP_747635.1	Aspergillus fumigatus Af293	ARD/ARD family protein, putative	13	0.000925134	0.0321132	0.766611	0.00517449	0.0533492	0.7245	0.125114	0.457554	0.924098	0.68422	0.93646	0.97781	432468	411719	456156	327936	333428	334660	457736	495596	453703	363112	307277	350800	266	266	266	1
XP_753704.1	Aspergillus fumigatus Af293	conserved hypothetical protein	22	0.381131	0.497324	1.05004	0.0240251	0.0942962	1.31995	0.125383	0.457912	1.08759	0.152302	0.735809	0.865193	117274	106847	106728	112586	124845	110155	95367.1	104581	104231	140479	115950	146771	154	154	154	1
XP_754218.1	Aspergillus fumigatus Af293	palmitoyl-protein thioesterase precursor	8	0.194384	0.270676	0.674149	0.0156218	0.0784223	0.47727	0.12543	0.457513	0.701894	0.974516	0.995621	0.991432	36650.5	57750	62009.2	41630.1	23322.1	41417.1	64430.7	84406.9	69791.5	37907.7	43383.3	25090.9	36	36	36	1
XP_751498.2	Aspergillus fumigatus Af293	ATP-dependent RNA helicase, putative	31	0.121796	0.187198	1.08347	0.00113143	0.0416296	1.1409	0.125631	0.458221	1.07818	0.306464	0.797808	1.02391	270206	273946	243232	287779	289451	274915	239811	248121	241420	274961	283938	273244	402	402	402	1
XP_754776.1	Aspergillus fumigatus Af293	inorganic diphosphatase, putative	26	0.297228	0.392509	1.04842	0.123999	0.225712	1.0737	0.125874	0.459262	1.0748	0.280575	0.787154	1.04949	2664237	2932551	3006345	2964955	3089016	2955448	2631287	2686943	2675756	3013440	2910958	2669487	1049	1049	1049	1
XP_751640.1	Aspergillus fumigatus Af293	TIM complex componenet Tim54	19	0.0639356	0.112886	1.10654	0.8811	0.933784	1.00633	0.126	0.459162	0.902347	0.683503	0.936653	0.992203	113821	102015	115293	123721	119954	122218	116033	131074	119803	125083	119194	124549	226	226	226	1
XP_755424.1	Aspergillus fumigatus Af293	MFS alpha-glucoside transporter, putative	6	0.0133654	0.0475042	1.305	0.0283275	0.101289	1.33841	0.126034	0.459138	1.10987	0.441686	0.876907	1.08216	144609	135709	141205	173855	206669	171406	138276	115974	126398	185590	147494	177534	47	47	47	1
XP_750620.1	Aspergillus fumigatus Af293	long-chain fatty acid transporter, putative	10	0.221943	0.304547	0.89125	0.127936	0.230668	0.843974	0.126226	0.459534	0.906284	0.704239	0.940285	0.957051	286202	306359	285546	281472	223852	281308	339811	294768	335791	238946	310856	272216	70	70	70	1
XP_751110.1	Aspergillus fumigatus Af293	conserved hypothetical protein	5	0.131872	0.197543	1.57215	0.734648	0.84179	0.961691	0.126415	0.45983	0.690471	0.53498	0.910428	1.12877	12006.9	21250.3	18286.5	19159.4	33956.2	27868.1	26601.7	20286.7	26264.4	20751.5	25586.5	23743	22	22	22	1
XP_751658.1	Aspergillus fumigatus Af293	phosphatidyl synthase	28	0.0530675	0.0990592	0.925735	0.221952	0.347775	1.08783	0.126774	0.461328	1.10612	0.18733	0.759965	0.941296	858874	790103	790134	752271	744620	759390	783480	749742	674483	826646	741094	832534	966	966	966	1
XP_750386.1	Aspergillus fumigatus Af293	ankyrin repeat protein	6	0.0267082	0.0633843	0.773578	0.00191983	0.0549217	0.618355	0.126885	0.461177	0.901266	0.227376	0.760115	1.12751	252564	258894	269349	208971	174923	223044	264144	314869	289254	176881	193002	166618	184	184	184	1
XP_753672.1	Aspergillus fumigatus Af293	RNase III domain protein	12	0.21698	0.298415	1.13251	0.00597315	0.057618	1.42856	0.126984	0.461155	1.12874	0.274967	0.782976	0.894824	177600	154613	149495	182666	202749	161000	148148	132505	145414	201574	183991	224387	166	166	166	1
XP_750576.1	Aspergillus fumigatus Af293	RNA polymerase II mediator complex subunit Srb5, putative	3	0.0613259	0.110202	0.885204	0.306197	0.443162	0.585406	0.127033	0.460761	0.947144	0.47706	0.891847	1.43219	108330	116604	108999	91979.5	105974	97977.7	120741	117315	114401	111849	105272	27610	33	33	33	0.9991
XP_752844.1	Aspergillus fumigatus Af293	C2H2 transcription factor (Sfp1), putative	6	0.351562	0.458124	0.674182	0.184091	0.306703	2.13142	0.127106	0.460541	2.4668	0.54611	0.916063	0.780263	66954.7	52234.7	57777.5	58456.1	55781.5	18989.4	12417.6	58487.6	18535.3	56449.1	53741.9	42967.3	20	20	20	1
XP_753033.1	Aspergillus fumigatus Af293	eukaryotic translation initiation factor subunit eIF2B-gamma, putative	20	0.00495003	0.0385706	1.10884	0.959745	0.976336	0.99845	0.127206	0.460194	0.962575	0.0750732	0.685829	1.069	135235	136005	132799	151891	151871	144355	138763	144946	136161	135905	137420	145958	210	210	210	1
XP_751153.1	Aspergillus fumigatus Af293	rhomboid family protein, putative	4	0.200719	0.27846	0.830751	0.147739	0.256526	1.19681	0.127262	0.459975	1.27139	0.260474	0.78261	0.882522	131358	101509	88503.3	91890.8	81796.1	90017.6	90982.5	77540.5	81394.6	106110	83515.7	111078	36	36	36	1
XP_752564.1	Aspergillus fumigatus Af293	glutamine amidotransferase, putative	5	0.720622	0.827605	0.985891	0.23183	0.357369	0.622246	0.127477	0.460363	0.902554	0.34539	0.825415	1.43001	73911.6	71548.8	75967.2	75773.8	74507.7	68188	84951.3	86967.9	73959.2	65406.9	76545.3	26294.6	27	27	27	1
XP_754115.2	Aspergillus fumigatus Af293	adenosine deaminase family protein	6	0.536206	0.671921	1.3221	0.871837	0.927984	0.918728	0.127559	0.460144	0.687584	0.987043	0.996835	0.989468	20795.1	37481.8	29599.4	47043.7	62703.5	18074.3	43188.8	47506.5	34591	14691.8	71450.7	52428.4	22	22	22	1
XP_751922.1	Aspergillus fumigatus Af293	aminopeptidase	55	0.00275687	0.0387032	1.19865	0.000244554	0.05	1.19935	0.127806	0.460851	0.968927	0.291658	0.792657	0.968361	527406	506666	502119	590657	639548	611704	533832	521937	529391	650331	623272	627808	1338	1338	1338	1
XP_755378.1	Aspergillus fumigatus Af293	prephenate dehydrogenase	19	0.0010815	0.03408	1.08927	0.424248	0.580469	1.04466	0.127969	0.460949	0.956138	0.948745	0.994839	0.996969	432908	438256	425625	466385	475444	470666	451664	469684	435481	453505	450354	515675	207	207	207	1
XP_747258.1	Aspergillus fumigatus Af293	pirin, putative	13	0.138591	0.205206	0.861703	0.149462	0.258031	0.894145	0.127982	0.460476	1.14678	0.242664	0.773869	1.10517	102303	101448	114674	102143	80226.3	92927.3	84090.2	103182	90951.1	85963.3	80805.5	81213.1	156	156	156	1
XP_752655.1	Aspergillus fumigatus Af293	nitrate transporter CrnA	10	0.135145	0.20202	1.15011	0.0364951	0.113868	1.41336	0.12821	0.461004	1.25153	0.796225	0.972251	1.01843	349513	296035	278319	355814	370218	332573	292128	210415	238987	324850	328311	388877	119	119	119	1
XP_755021.1	Aspergillus fumigatus Af293	conserved hypothetical protein	9	0.519584	0.654365	0.949882	0.334509	0.480489	1.0772	0.128256	0.460753	1.11868	0.873742	0.987084	0.986459	82660.8	81634.1	71230.7	71244.2	69645.6	83023.9	66849.1	68627	74840.2	84499.9	69488	73087.6	74	74	74	1
XP_751428.1	Aspergillus fumigatus Af293	Hsp70 family protein	8	0.1504	0.220415	0.832846	0.440658	0.596315	0.862045	0.128327	0.460675	1.34125	0.119211	0.713428	1.29582	53878.8	68094.4	74274.3	57874.9	50852	53488.9	38071.9	53435.6	55514.4	51320.2	42393.8	33253.7	47	47	47	1
XP_747595.1	Aspergillus fumigatus Af293	HATPase_c domain protein, putative	22	0.792744	0.876981	0.981993	0.135616	0.240236	0.883481	0.128361	0.460286	1.07856	0.0966601	0.710826	1.19883	85114.5	96998.7	88873.1	92952.1	79822.8	93643.6	83793.8	84882.1	82219.4	83039.3	73431.1	66134.7	98	98	98	1
XP_754827.1	Aspergillus fumigatus Af293	glycosyl transferase, putative	16	0.595974	0.728606	0.704928	0.282226	0.414618	0.626574	0.128604	0.460347	0.740775	0.806824	0.975471	0.83341	49027.1	60944.3	79034.8	84029.3	13367.2	73646.7	76810.5	78061.7	96888.2	64634.6	86728.2	25493	33	33	33	1
XP_751117.1	Aspergillus fumigatus Af293	serine palmitoyl CoA transferase subunit LcbA	17	0.335324	0.437172	1.03052	0.354781	0.504055	0.948914	0.128802	0.460359	0.913988	0.829903	0.976745	0.992591	189479	191269	186550	192186	205099	187709	223806	207673	190514	203067	195721	190363	235	235	235	1
XP_751126.1	Aspergillus fumigatus Af293	NGG1 interacting factor Nif3, putative	13	0.0103267	0.043211	1.21425	0.407387	0.561257	1.05383	0.129121	0.460644	0.881767	0.574238	0.920553	1.01599	132987	148471	148017	178891	176003	166180	172646	169971	145268	174923	167108	170677	168	168	168	1
XP_001481431.1	Aspergillus fumigatus Af293	conserved hypothetical protein	3	0.186276	0.2611	0.511992	0.706585	0.823944	0.792918	0.129141	0.460378	1.68901	0.901177	0.991034	1.0906	39001.5	52541.7	49375.6	14126.7	53558.1	17948.3	32872.9	16559.2	38576.5	8769.89	51480.1	23187.4	8	8	8	1
XP_755937.1	Aspergillus fumigatus Af293	t-complex protein 1, alpha subunit, putative	33	0.138297	0.2053	1.06503	0.000783395	0.0407018	1.09428	0.129239	0.460541	1.03804	0.746438	0.957655	1.0103	675610	634965	646904	669332	735063	681409	624289	636908	623989	694759	678273	689892	716	716	716	1
XP_754655.1	Aspergillus fumigatus Af293	camp independent regulatory protein	6	0.0877161	0.144074	0.893181	0.0226521	0.0895071	0.82752	0.129359	0.460569	0.919412	0.90084	0.991414	0.992364	76717.9	71865.7	74157.8	60867.2	71442.3	66997	82084.7	85644.4	74831.4	62563.7	70207.3	67869.8	41	41	41	1
XP_751623.1	Aspergillus fumigatus Af293	ubiquitin conjugating enzyme (MmsB), putative	11	0.0584989	0.10573	0.928647	0.189542	0.311779	1.14794	0.129489	0.460722	1.16898	0.248722	0.773932	0.945667	363947	395178	370686	350334	341278	357108	351764	275558	344316	391203	376522	342754	193	193	193	1
XP_748966.1	Aspergillus fumigatus Af293	nonsense-mediated mRNA decay factor (Upf2), putative	21	0.979567	0.990648	1.00123	0.103673	0.192799	0.870993	0.129559	0.460523	0.878313	0.827812	0.978503	1.00964	155418	168762	181342	166353	169462	169344	174453	193064	208424	180231	156888	164041	121	121	121	1
XP_753046.1	Aspergillus fumigatus Af293	protein kinase (Lkh1), putative	3	0.163877	0.236193	0.622561	0.27538	0.40658	1.35445	0.129575	0.460057	1.6227	0.331806	0.812311	0.745859	19457.2	30772.6	25874.2	9963.26	23135.7	16217.1	11428.9	13553.2	23407.3	17963	25493.6	19673.3	11	11	11	0.9998
XP_747918.1	Aspergillus fumigatus Af293	homocysteine synthase CysD	24	0.104146	0.164542	1.07113	0.497267	0.653947	0.964373	0.129996	0.461076	0.945838	0.387006	0.853021	1.05054	656466	615600	618859	696614	641650	687596	666763	642231	690224	658360	682686	589799	832	832	832	1
XP_751632.1	Aspergillus fumigatus Af293	conserved hypothetical protein	24	0.0372608	0.0769359	1.07591	0.430345	0.58708	0.937461	0.130338	0.461535	0.905948	0.534421	0.910673	1.03974	197931	193448	209054	213463	214391	217836	231432	231259	201142	187520	206985	228507	305	305	305	1
XP_753075.1	Aspergillus fumigatus Af293	FYVE domain protein, putative	3	0.00274015	0.0383333	0.545597	0.405461	0.559467	0.831068	0.130899	0.463201	1.44803	0.638907	0.936944	0.950635	50302.6	45585	47509	28798.7	21895.6	28059.2	35872.2	22813.7	43843.1	25143.7	27549.3	29732	14	14	14	1
XP_753342.1	Aspergillus fumigatus Af293	protein-transporting protein BCP1	8	0.0631032	0.111616	1.12405	0.211614	0.334108	0.910788	0.130963	0.46294	0.895733	0.124803	0.709342	1.10547	84223.5	98275.8	93602.2	102421	104170	103132	100877	109864	97270.4	86883.6	103189	90846.6	86	86	86	1
XP_746500.1	Aspergillus fumigatus Af293	serine protein kinase Sky1, putative	21	0.251178	0.337297	0.933168	0.0215215	0.0882576	0.871037	0.131012	0.462473	0.934387	0.985312	0.996533	1.00104	264683	272541	263656	266300	225595	257261	268378	287640	302009	248207	242472	256006	225	225	225	1
XP_001481711.1	Aspergillus fumigatus Af293	BAG domain protein	6	0.33076	0.432851	1.10938	0.0743601	0.15981	0.872139	0.131031	0.462089	0.837749	0.33226	0.812709	1.06563	76703.5	76045.5	99281.4	90676.6	88259.4	98795.2	100968	104398	93441.3	94147.7	80116.7	86624.1	46	46	46	1
XP_751233.1	Aspergillus fumigatus Af293	cytochrome c peroxidase, putative	9	0.00502829	0.0387062	0.709311	0.0233402	0.0909675	0.5964	0.131084	0.461825	0.817995	0.824244	0.977615	0.97286	60411.4	50641.1	51160.7	37443.4	39984.9	37307.6	76188.5	67029.3	55995.3	31644.5	41183.7	46547.3	44	44	44	1
XP_755707.2	Aspergillus fumigatus Af293	conserved hypothetical protein	5	0.15444	0.22532	0.409985	0.601106	0.742441	1.56785	0.13117	0.461908	2.83403	0.715317	0.948451	0.741085	86404.7	81801.1	75099.2	15110.5	28286.4	85581.2	12315.7	23652.7	80052.9	77452.7	81477.9	14241.5	11	11	11	1
XP_754683.1	Aspergillus fumigatus Af293	vacuolar sorting ATPase Vps4, putative	20	0.00604662	0.0398928	0.915954	0.00651011	0.0593237	0.868983	0.131388	0.462355	0.960828	0.619347	0.935924	1.01276	262406	268519	261858	243661	235427	247168	275382	284282	265702	239327	246648	231229	231	231	246	1
XP_750301.1	Aspergillus fumigatus Af293	mandelate racemase/muconate lactonizing enzyme family protein	5	0.0284124	0.0654457	1.25299	0.230852	0.356785	0.748787	0.131508	0.462044	0.793804	0.185493	0.761624	1.32831	32157.9	38915.4	39345.3	45345.5	47326.9	45133.4	37731.6	49288.5	52931.3	35316.2	46465.7	25184.4	41	41	41	1
XP_748239.1	Aspergillus fumigatus Af293	DUF858 domain protein	5	0.504784	0.639242	1.09083	0.190012	0.311346	2.28945	0.131628	0.461938	2.56655	0.379889	0.851751	1.22285	61709.3	89957.8	76894.9	86361.2	85711.4	74851.3	22783.9	14757.9	75091.3	78075.6	85654.1	45307.4	27	27	27	1
XP_001481657.1	Aspergillus fumigatus Af293	acetyltransferase,	10	0.0214168	0.0580207	1.2972	0.742145	0.844077	1.03457	0.132124	0.463536	0.885745	0.357346	0.834698	1.1106	151606	182460	178167	210055	239230	214086	201920	191125	183776	207855	227045	166415	119	119	119	1
XP_750655.1	Aspergillus fumigatus Af293	lysyl-tRNA synthetase	37	0.101182	0.161075	1.04684	0.249621	0.379386	0.980014	0.132409	0.464711	0.97619	0.142366	0.72657	1.04276	820102	846116	845504	905556	847973	876510	862828	844748	865284	836640	861142	823937	1051	1051	1051	1
XP_750770.1	Aspergillus fumigatus Af293	NADH-ubiquinone oxidoreductase 304 kDa subunit precursor	21	0.00904617	0.0419611	1.16245	0.405512	0.559299	1.04536	0.132922	0.465964	0.912647	0.654069	0.9387	1.01487	1351381	1447414	1315047	1557144	1633890	1588116	1558683	1564213	1387873	1636400	1583765	1491507	629	629	629	1
XP_754015.1	Aspergillus fumigatus Af293	conserved hypothetical protein	9	0.0937922	0.152052	0.925215	0.843039	0.911722	0.989687	0.133109	0.465918	1.10851	0.240716	0.775592	1.03629	73857	79804.8	71574.4	67457.5	70852.1	69907.3	64795.1	73909.5	64672.8	65930.3	65195.1	69848.5	54	54	54	1
XP_752683.1	Aspergillus fumigatus Af293	conserved hypothetical protein	9	0.345147	0.449468	0.973309	0.332459	0.477531	0.957304	0.133222	0.46557	0.960374	0.598711	0.934538	0.97643	53581.6	52845.2	52820.8	49867.6	51021	54201.4	54594.9	57579.3	53713.9	54134.6	49525.2	55252.7	68	68	68	1
XP_752596.2	Aspergillus fumigatus Af293	nucleoporin, putative	12	0.223017	0.305642	0.912462	0.0131774	0.0736264	0.805778	0.133279	0.465222	0.903018	0.731545	0.954862	1.02258	117041	123800	132309	117783	102121	121086	126746	144104	142544	116610	105135	111102	135	135	135	1
XP_752082.1	Aspergillus fumigatus Af293	60S ribosomal protein L36	7	0.271815	0.363242	0.96196	0.0500385	0.13021	1.48308	0.133532	0.466004	1.27091	0.0494049	0.666575	0.824338	2091965	2112963	2012484	2002783	2081721	1899298	1954429	1277211	1736018	2308929	2231362	2743809	260	260	278	1
XP_751131.1	Aspergillus fumigatus Af293	translation initiation factor eif-2b epsilon subunit, putative	23	0.0214226	0.0579458	1.18638	0.551389	0.703483	0.954393	0.133577	0.465879	0.899271	0.158349	0.746841	1.11786	126667	136549	116458	147875	151813	149828	148795	140204	132770	132189	150658	120904	331	331	331	1
XP_754189.1	Aspergillus fumigatus Af293	DNA-directed RNA polymerase III largest subunit, putative	30	0.0688201	0.11865	0.951628	0.780158	0.871743	1.01915	0.133603	0.465417	0.934366	0.0713611	0.686405	0.872463	118572	113948	111407	109568	110337	107298	125165	127790	115363	113330	125574	137251	171	171	171	1
XP_752246.1	Aspergillus fumigatus Af293	exportin KapK	48	0.0255685	0.0633427	1.14635	0.55762	0.707553	1.02027	0.13385	0.465982	0.949831	0.198316	0.758062	1.0672	368000	359806	338800	383344	416650	423102	378668	365228	378527	366927	403915	375145	887	887	887	1
XP_755082.1	Aspergillus fumigatus Af293	RNA polymerase II transcriptional coactivator, putative	5	0.352044	0.458634	0.942343	0.630388	0.765406	0.952305	0.134096	0.46564	0.931132	0.47028	0.889737	0.921392	31279.2	33659.4	33087.4	34029.6	29937.3	28614.3	33240.9	35081.6	37003.2	33391.9	28649.5	38954.8	47	47	47	1
XP_749920.1	Aspergillus fumigatus Af293	conserved serine-rich protein	9	0.196657	0.273847	0.925089	0.369471	0.522293	1.22076	0.134098	0.465179	1.44133	0.209321	0.757196	1.09224	33530.7	31329.2	29287.4	27205.4	29920.1	29922.9	14887	27459.2	25135.5	28128.7	24036.3	27647.5	25	25	25	1
XP_750202.1	Aspergillus fumigatus Af293	NADH-cytochrome b5 reductase, putative	30	0.216774	0.298517	1.02249	0.473163	0.632033	0.964091	0.134516	0.466304	0.929972	0.663295	0.940942	0.986305	1196569	1242178	1194009	1235597	1256503	1221985	1364911	1334509	1211416	1313127	1191572	1263705	976	976	976	1
XP_746618.2	Aspergillus fumigatus Af293	THO complex subunit Tho1, putative	13	0.453915	0.586598	1.0638	0.112666	0.207854	0.800154	0.134718	0.466808	0.880703	0.239629	0.776511	1.17089	57238.4	59245.8	69568.4	60165	68682.1	68731	67571.6	68415.8	74704.7	61129.9	63574.4	45525.3	87	87	87	1
XP_747954.1	Aspergillus fumigatus Af293	2Fe-2S iron-sulfur cluster binding domain protein	5	0.98768	0.994128	1.00843	0.0880926	0.177585	0.435225	0.134854	0.466686	0.38727	0.787375	0.968837	0.89732	28279.2	113440	122847	64154	59153.8	106496	188095	256320	140733	59685.5	59078.3	158635	31	31	31	1
XP_750964.1	Aspergillus fumigatus Af293	HAD superfamily hydrolase, putative	15	0.658162	0.782681	0.983224	0.0164889	0.0793969	0.808356	0.134866	0.466439	0.923573	0.0729748	0.68925	1.12337	736040	802839	827269	782974	769666	771054	828792	894763	836776	751591	684431	637177	367	367	367	1
XP_747622.1	Aspergillus fumigatus Af293	37S ribosomal protein S9	18	0.887227	0.939068	1.00598	0.0383962	0.118863	1.10681	0.135235	0.468047	1.08544	0.645745	0.936867	0.986559	344892	359077	315695	348657	338530	337217	311541	325351	301614	363531	334606	340770	302	302	302	1
XP_751298.1	Aspergillus fumigatus Af293	calcium sensor (NCS-1), putative	12	0.295988	0.390982	1.12409	0.86047	0.922662	0.978887	0.136117	0.470702	0.902706	0.809167	0.976315	1.03661	281053	272959	325519	289130	381477	321593	319195	325213	327038	315346	386876	261014	142	142	142	1
XP_755518.1	Aspergillus fumigatus Af293	conserved hypothetical protein	9	0.0700309	0.12	0.93056	0.274799	0.406532	0.946398	0.136168	0.470314	1.04151	0.644432	0.936093	1.02408	294230	290845	306203	280471	285886	263336	283987	278370	293389	285808	275810	249403	137	137	137	1
XP_748916.1	Aspergillus fumigatus Af293	hypothetical protein AFUA_7G05940	3	0.0954129	0.154196	1.45677	0.357427	0.507084	0.707928	0.136261	0.470497	0.721467	0.298707	0.793144	1.48463	28522.6	37472	50306.5	61237.3	53421.4	50811.1	57339.6	46400.8	53813.6	40573.5	61935.4	20214.2	23	23	23	1
XP_753814.1	Aspergillus fumigatus Af293	conserved hypothetical protein	4	0.13817	0.205664	1.35182	0.347835	0.495731	0.406693	0.136263	0.470035	0.726085	0.355901	0.83355	2.41346	234146	349402	386650	426059	471869	388686	383271	502211	429315	401365	421920	32824.6	6	6	6	0.9705
XP_749375.1	Aspergillus fumigatus Af293	conserved hypothetical protein	3	0.338735	0.441426	1.12039	0.634283	0.768468	0.947763	0.136505	0.470735	0.807325	0.641098	0.936953	0.954368	40252.1	52662.9	52351.5	52079	49918.8	60034.2	67594.7	59537.5	52405.2	48788.5	62238.6	59129	28	28	28	0.9991
XP_754064.1	Aspergillus fumigatus Af293	peptide chain release factor eRF/aRF, subunit 1	27	0.00130254	0.0340719	1.19012	0.893976	0.939728	1.00702	0.136802	0.47153	0.94558	0.0672977	0.660214	1.11751	560485	583663	568821	659117	701802	678097	580439	595355	636903	617415	646613	562979	869	869	869	1
XP_746502.1	Aspergillus fumigatus Af293	cell cycle control protein (Cwf26), putative	5	0.192423	0.268676	0.753946	0.580987	0.729057	0.902282	0.136823	0.471069	0.707183	0.0330897	0.722415	0.590921	14226.8	23661.8	24025.7	15600.7	16297	13633.3	32235.7	25145	28212.8	19485.2	33410.5	25803.2	15	15	15	1
XP_756021.1	Aspergillus fumigatus Af293	SWI-SNF complex subunit (Snf5), putative	23	0.987899	0.994007	0.998974	0.129089	0.231914	0.876673	0.136853	0.470727	0.857479	0.628047	0.936678	0.977102	2663663	3229837	3132921	3094436	2874424	3020919	3264368	3917497	3342961	2839967	3157199	3212449	128	128	128	1
XP_746726.1	Aspergillus fumigatus Af293	conserved hypothetical protein	9	0.0702146	0.120003	0.917638	0.693158	0.814995	1.03285	0.137427	0.472714	1.07125	0.546596	0.914645	0.951756	53271.7	49323.3	52455.1	49926.9	46234.5	46137	46431.9	51016.6	47330.1	51777.4	43431.9	54931.8	33	33	33	1
XP_752640.1	Aspergillus fumigatus Af293	conserved hypothetical protein	16	0.289569	0.384215	0.971729	0.438527	0.594611	1.02085	0.137574	0.472784	1.04932	0.958838	0.993489	0.998831	156242	164636	157451	157248	157820	149746	145971	154046	155892	152504	159072	153728	73	73	73	1
XP_755972.1	Aspergillus fumigatus Af293	DRAP deaminase (Rib2), putative	7	0.172202	0.246063	0.933882	0.0815458	0.169484	0.871989	0.137592	0.472323	0.949666	0.811568	0.976132	1.01707	64693.8	60704.3	66528.7	63309.3	56969.4	59000.9	67532.4	66479.2	67948.6	52190.6	62043.5	62463.1	49	49	49	1
XP_754056.1	Aspergillus fumigatus Af293	NTP binding protein, putative	6	0.161375	0.233692	0.918989	0.836192	0.907881	1.02244	0.137727	0.472167	1.20865	0.142695	0.726139	1.08636	146888	132790	141709	134002	134307	119199	108817	102195	140776	123994	117502	114847	51	51	51	1
XP_753438.1	Aspergillus fumigatus Af293	Rab small monomeric	15	0.309136	0.408113	0.945597	0.461686	0.619823	0.966875	0.137912	0.472167	0.924744	0.100845	0.71519	0.904393	472816	420773	414658	411191	429483	394965	463603	472585	476145	437316	436733	493702	196	196	196	1
XP_747621.1	Aspergillus fumigatus Af293	translation elongation factor eEF-1 subunit gamma, putative	47	0.00675829	0.038607	1.18548	0.965334	0.980522	1.00182	0.13802	0.472466	0.936399	0.0509647	0.673952	1.10807	4001787	4294821	4440465	5005190	5147195	4935413	4381525	4552848	4659461	4715720	4684241	4230889	2964	2964	2964	1
XP_753769.1	Aspergillus fumigatus Af293	mitochondrial	4	0.00828673	0.0401535	0.656994	0.000744341	0.0421818	0.567428	0.138073	0.472248	0.900196	0.666563	0.940385	1.04229	61406.1	66508.1	59159.6	47759.8	36740.4	39047.1	73857.9	70682.9	63443.7	39603.3	41942.7	36428.8	25	25	25	1
XP_750474.1	Aspergillus fumigatus Af293	NUDIX family hydrolase, putative	3	0.0914026	0.149173	0.540091	0.252375	0.381414	0.693633	0.138233	0.472384	0.699993	0.148334	0.734506	0.545043	22338.7	34631.8	36120.6	18715.1	22550.9	10431.2	51545.7	45532.1	34713.5	36867.6	40143.4	18371.2	20	20	20	0.9998
XP_750539.1	Aspergillus fumigatus Af293	heat shock protein Hsp30-like, putative	5	0.00307734	0.0376067	2.80064	0.265323	0.395628	1.67256	0.138343	0.472182	0.502216	0.460175	0.886758	0.840943	8342.66	12126.3	14264.9	32353	29976.4	32687.2	34207.8	28843.2	11546.8	24705	46453.8	46448	46	46	46	1
XP_751462.1	Aspergillus fumigatus Af293	snoRNP protein (gar1), putative	8	0.0407272	0.0814093	1.66909	0.483956	0.642493	0.928522	0.139295	0.475702	0.737203	0.0578161	0.66623	1.32518	158244	218170	275069	341505	324305	398706	293469	265222	304532	282872	298424	224779	94	94	94	1
XP_752665.1	Aspergillus fumigatus Af293	Avl9 protein, putative	18	0.198733	0.27639	0.970472	0.16819	0.283087	0.92547	0.139327	0.475243	0.949021	0.912061	0.990782	0.995168	73907	76752	77199.9	71846.6	75365.2	73920.3	83260.6	80514.1	76428.2	75960.3	77910.6	68622.8	123	123	123	1
XP_746963.1	Aspergillus fumigatus Af293	zinc-binding alcohol dehydrogenase, putative	17	0.425728	0.554795	0.935727	0.114105	0.209762	0.889383	0.13947	0.475525	0.864322	0.143281	0.725695	0.90936	110675	106987	88567.3	95851.2	99434.9	90149.4	126729	114660	111773	95988.5	110938	107299	149	149	149	1
XP_748386.2	Aspergillus fumigatus Af293	aminopeptidase Y, putative	8	0.0651207	0.11315	2.29628	0.0323255	0.107411	4.27357	0.139625	0.475676	1.70994	0.867588	0.986938	0.91879	26225.2	29971.9	37256.7	84778.6	38472.9	108710	11965.9	16184.8	30244.1	38185	125076	95718.9	31	31	31	1
XP_747936.1	Aspergillus fumigatus Af293	oxidosqualene:lanosterol cyclase	16	0.412013	0.537343	0.970749	0.0258966	0.0998462	0.927863	0.139676	0.47541	0.959686	0.905629	0.990835	1.00404	198642	209981	200493	204321	186679	200568	206357	216865	211424	191177	195552	202169	218	218	218	1
XP_749969.1	Aspergillus fumigatus Af293	Ras	9	0.904034	0.949074	0.995135	0.0170476	0.0803738	1.16103	0.139716	0.474953	1.079	0.0847287	0.70479	0.92483	542249	534609	484638	518214	529533	504540	477511	466644	501898	595488	541795	542506	231	231	231	1
XP_753859.1	Aspergillus fumigatus Af293	pentatricopeptide repeat protein	8	0.968663	0.984352	1.04547	0.114099	0.209898	0.177757	0.139887	0.475265	0.244943	0.763161	0.964332	1.44063	146814	11824.3	23436.9	25575.5	151742	11979.8	185006	129406	115640	126045	16912.7	7294.34	13	13	13	1
XP_755291.1	Aspergillus fumigatus Af293	serine/threonine protein kinase	9	0.258793	0.346903	1.06807	0.447899	0.604837	0.947762	0.13997	0.474928	0.926905	0.566183	0.917517	1.04457	65034.8	73822.9	69803.2	75570.2	77808	69444.6	76270.9	72145.3	76478.6	67145.5	80218.5	66514	91	91	91	1
XP_755429.1	Aspergillus fumigatus Af293	alcohol dehydrogenase, putative	7	0.0025872	0.0386538	0.700619	0.0630311	0.145708	0.748357	0.140059	0.474898	1.08721	0.886869	0.987009	1.01785	59451.7	59321.4	59167.3	42865.6	37470.2	44679.5	49936.7	55983.6	58081.8	39311.6	49667.6	34854.1	37	37	37	1
XP_752415.1	Aspergillus fumigatus Af293	F1F0 ATP synthase assembly protein Atp10, putative	9	0.0570463	0.104384	0.961488	0.09611	0.186437	0.925612	0.140134	0.474562	0.938809	0.226966	0.76032	0.975196	57298.4	57954.8	56117.2	55353.7	55729.1	53694.6	59056.4	64993.1	58676.1	55694.7	55445.3	57836.8	80	80	80	1
XP_752268.1	Aspergillus fumigatus Af293	methionyl-tRNA synthetase	37	0.372097	0.486139	1.01466	0.103131	0.192742	0.952787	0.140193	0.474291	0.958363	0.224595	0.758454	1.0206	522390	531149	539718	548387	540284	528002	558722	572008	532340	521748	537327	524900	831	831	831	1
XP_746730.1	Aspergillus fumigatus Af293	cytochrome c oxidase assembly protein (Pet117), putative	3	0.201077	0.278818	0.890097	0.272023	0.40393	0.873808	0.140477	0.474752	0.918301	0.613211	0.936534	0.935419	53837.8	50535.4	57585.2	53313.6	42470.3	48795.7	57513.2	56785	61949.5	42684.9	51993.6	60822.3	25	25	25	1
XP_001481629.1	Aspergillus fumigatus Af293	conserved hypothetical protein	4	0.295452	0.390381	0.532695	0.0395842	0.119871	0.745592	0.140801	0.475771	0.556323	0.0962099	0.711162	0.39747	43201.3	29194.5	14894.7	10488.9	32544	8318.9	43887.8	44753.1	55549.8	38575	31545.7	37162.8	21	21	21	1
XP_755544.1	Aspergillus fumigatus Af293	conserved hypothetical protein	8	0.797057	0.880335	1.01626	0.110578	0.204131	1.77238	0.140892	0.4755	1.58573	0.523785	0.906829	0.909231	50559.9	45988.1	46954.4	52696	49197	44200.2	36368.8	40986.4	18368.5	46733.6	47427.8	68778.9	32	32	32	1
XP_752124.1	Aspergillus fumigatus Af293	mitochondrial cytochrome b2-like, putative	10	0.228455	0.311383	0.918442	0.137441	0.242561	0.855171	0.141079	0.475553	0.885431	0.560525	0.916949	0.950942	58434.7	68559.4	62257.3	56210.2	55175.8	62304.7	65032.6	76494.6	72227.4	53413.2	62004.2	67850.5	103	103	103	1
XP_750579.1	Aspergillus fumigatus Af293	regulator of	2	0.497233	0.632078	0.622973	0.122637	0.224336	0.42805	0.14212	0.479146	0.348128	0.251039	0.776969	0.506657	23058	12643.5	88923.3	10945.8	25873.5	22131.3	85402.9	78833.2	91264.9	23587.6	86438.9	23636.1	10	10	10	0.9991
XP_755547.1	Aspergillus fumigatus Af293	midasin, putative	62	0.54123	0.675591	1.02065	0.1837	0.306185	0.928328	0.142198	0.479219	0.940536	0.490846	0.898769	1.03407	165295	168042	160934	174733	159244	170813	172118	186076	167758	151914	169567	166865	295	295	295	1
XP_750452.1	Aspergillus fumigatus Af293	fructosamine-3-kinase, putative	7	0.347385	0.452128	0.96853	0.529571	0.685707	0.959236	0.142387	0.479692	0.928207	0.294706	0.792003	0.937201	77724.8	76108.6	76687.6	71631.2	78853.1	72968.9	84408.5	87739.5	76595.4	86680.6	74623.4	77404	47	47	47	1
XP_755484.1	Aspergillus fumigatus Af293	MFS monosaccharide transporter, putative	18	0.00759342	0.0406887	1.11236	0.603349	0.743919	0.964373	0.142428	0.479407	0.93269	0.262405	0.783102	1.07582	476735	466493	488404	529074	547173	516417	527881	532507	476242	544084	487654	452528	428	425	428	1
XP_746638.1	Aspergillus fumigatus Af293	succinyl-CoA synthetase beta subunit, putative	30	0.0840842	0.139669	1.13415	0.0202117	0.0845051	1.39934	0.142813	0.480494	1.16676	0.423751	0.870926	0.945644	1167142	1107227	1229730	1251152	1449660	1278204	1165531	959500	894653	1316416	1370251	1519848	1208	1208	1208	1
XP_754797.1	Aspergillus fumigatus Af293	F-box and JmjC domain protein, putative	12	0.00324489	0.0375772	0.794734	0.0137386	0.075784	0.657388	0.142873	0.480349	0.84251	0.729876	0.955704	1.01853	56153.6	54669.5	52325.2	45833.6	42356	41533.6	60500.9	77341.7	57402.7	41205	40388.2	45853	45	45	45	1
XP_747828.1	Aspergillus fumigatus Af293	aspartate transaminase, putative	27	0.656121	0.782292	1.01215	0.172504	0.288135	0.866896	0.143198	0.481179	0.854235	0.914936	0.989654	0.997366	399583	412442	430545	414712	429850	412722	549912	500644	413461	433299	422113	405454	546	546	564	1
XP_753669.1	Aspergillus fumigatus Af293	conserved hypothetical protein	5	0.207322	0.287411	0.973764	0.46257	0.620498	0.898782	0.143203	0.480723	1.07061	0.308467	0.799192	1.15993	53289.3	50544.9	50690.3	49820.9	50550.7	50057.1	45195.6	48588.3	50666.2	49554.2	48621.6	33527.4	21	21	21	1
XP_755486.1	Aspergillus fumigatus Af293	ketoreductase, putative	13	0.0211256	0.0572083	1.28444	0.000126709	0.1	1.48326	0.143373	0.480269	1.09735	0.383916	0.853449	0.950258	438439	433245	380904	516493	591714	501670	391800	362064	385981	567564	550330	572047	320	320	320	1
XP_749674.1	Aspergillus fumigatus Af293	conserved hypothetical protein	8	0.0579918	0.105695	1.11331	0.529121	0.686174	0.963788	0.143445	0.480076	0.926677	0.265974	0.783834	1.07044	51187.9	56364.1	56182.7	58160.4	63577.4	60490.8	62143.7	56898.1	57609.3	54752.9	53617.8	62117.8	56	56	56	1
sp|P25691|K2M3_SHEEP	Ovis aries OX=9940	Keratin, type II microfibrillar, component 5	3	0.115675	0.177703	0.344562	0.261793	0.391629	1.98184	0.143771	0.480797	3.3811	0.179306	0.766966	0.587836	42178.7	118558	190186	45296.5	45428.2	18906.7	55088.9	10783.4	41419.7	48746.7	50823.4	77308.3	21	1	21	0.9946
XP_750384.1	Aspergillus fumigatus Af293	pathogenesis associated protein Cap20, putative	9	0.729322	0.834784	1.0302	0.272537	0.404112	1.06259	0.14422	0.481823	1.13163	0.218905	0.758825	1.09714	186213	210945	168961	213094	184365	184708	166269	172729	159470	167457	171198	191668	130	130	130	1
XP_748056.1	Aspergillus fumigatus Af293	oxidoreductase, short-chain dehydrogenase/reductase family	16	0.713716	0.823576	1.04145	0.092646	0.18262	0.829296	0.144464	0.482699	0.825948	0.678437	0.937871	1.03725	339393	352833	286290	395003	325648	301057	334198	412075	441814	317884	326987	333848	347	347	347	1
XP_750100.1	Aspergillus fumigatus Af293	topoisomerase I	33	0.141832	0.209425	0.950315	0.50708	0.663538	0.971341	0.14461	0.482621	0.953816	0.167974	0.759791	0.933168	148445	144894	142742	143648	131682	139297	159404	150716	147270	141745	145089	157668	312	312	312	1
XP_749123.1	Aspergillus fumigatus Af293	oxidoreductase, 2-nitropropane dioxygenase family, putative	2	0.20044	0.27843	1.43798	0.887396	0.93781	0.974476	0.144813	0.482879	0.734087	0.753293	0.960762	1.08325	14646	14940.2	17647.7	34923	20504.8	16034.8	19252.4	29281.8	17315.8	20075.2	19199.7	23436.2	11	11	11	0.9991
XP_754847.1	Aspergillus fumigatus Af293	plasma membrane H+-ATPase Pma1	67	0.0640452	0.112979	1.08458	0.925523	0.956715	1.00516	0.145131	0.483331	0.928382	0.970932	0.995076	1.00174	3651801	3712809	3907354	3884320	4219248	4124103	4344631	3919486	3888030	4368471	3996315	3851486	4295	3524	4295	1
XP_751069.1	Aspergillus fumigatus Af293	dynamin	33	0.531886	0.667268	0.92829	0.632305	0.767003	1.07571	0.14558	0.48391	1.3585	0.0422674	0.692077	1.17233	243082	307652	335493	299824	264698	252890	163189	254584	240875	240385	227339	227938	485	485	485	1
XP_752402.2	Aspergillus fumigatus Af293	conserved hypothetical protein	9	0.382079	0.498199	1.05738	0.456228	0.614229	0.951977	0.145638	0.483797	0.886895	0.773212	0.966277	0.985095	45048.4	42809.5	47852.5	43767.3	51373	48521.7	52765.3	45475.8	55128.8	49569.9	48610.1	47363.4	70	70	70	1
XP_755336.1	Aspergillus fumigatus Af293	actin cytoskeleton protein (VIP1), putative	16	0.0628297	0.11143	1.05417	0.0850941	0.17318	1.18337	0.145685	0.483344	1.09568	0.695953	0.936107	0.976057	876487	895631	932088	941096	969206	939761	895330	817363	760116	870301	1011311	1047340	515	515	515	1
XP_752579.1	Aspergillus fumigatus Af293	NADH-ubiquinone oxidoreductase 14 kDa subunit, putative	3	0.0149273	0.0490646	2.86647	0.284843	0.418946	1.60842	0.145749	0.483247	0.499029	0.671566	0.939219	0.889352	114142	74296.1	51115.8	265923	181552	211471	239917	172092	84482.4	386562	185601	202296	54	54	54	1
XP_754237.1	Aspergillus fumigatus Af293	GATA-type sexual development transcription factor NsdD	5	0.0510144	0.0960677	0.5054	0.000150776	0.0816	0.447857	0.145937	0.483428	0.965082	0.753158	0.960895	1.08908	33527.2	32329.7	32575	20509.5	21945.9	10127	34744.7	34337.6	32925.6	13684.9	15686.5	16437.7	19	19	19	1
XP_755639.1	Aspergillus fumigatus Af293	arginine-tRNA-protein transferase 1	3	0.144674	0.213383	2.85995	0.870455	0.927274	1.02714	0.145946	0.482976	0.350768	0.883755	0.98739	0.976669	51287.7	7417.43	13187.6	43302.1	58814.6	46079.8	51528.1	55859.3	40386	57296.5	55644.5	39510.5	23	23	23	1
XP_746652.1	Aspergillus fumigatus Af293	proteasome regulatory particle subunit Rpt6, putative	26	0.15458	0.225335	0.987686	0.621609	0.76041	1.01583	0.146065	0.482771	1.03862	0.675486	0.938193	1.00985	421016	423473	430618	420111	421102	418139	409856	395030	423237	428234	420859	398558	526	525	549	1
XP_750426.1	Aspergillus fumigatus Af293	40S ribosomal protein S26	6	0.87986	0.934136	1.00928	0.0225207	0.0895457	1.37611	0.146068	0.482321	1.18066	0.0476515	0.680701	0.865928	3363954	3440020	2941205	3377564	3362602	3080989	3203852	2591862	2490446	3485672	3997350	3867809	247	247	247	1
XP_754822.1	Aspergillus fumigatus Af293	mitochondrial 54S ribosomal protein YmL37	7	0.00345798	0.0367413	0.794642	0.138321	0.243016	0.881586	0.146313	0.483005	1.07423	0.654155	0.9381	0.968288	164168	177902	175366	135230	131575	144438	155899	170773	155188	126072	144977	154880	98	98	98	1
XP_001481527.1	Aspergillus fumigatus Af293	conserved hypothetical protein	2	0.0617424	0.110565	0.286281	0.509744	0.666681	1.75209	0.146556	0.48314	3.07302	0.361607	0.837496	0.502112	114269	104525	99148.6	79009.3	21104	16663.5	20236.1	119168	16922.1	64213.7	26298.8	129971	27	27	27	0.9991
XP_750481.1	Aspergillus fumigatus Af293	cytochrome P450, putative	5	0.148396	0.21804	0.852893	0.533846	0.689749	1.27195	0.146728	0.483464	1.84303	0.183078	0.762782	1.23582	36890.6	30744.8	28147.9	25881.8	29292	26125.9	9169.15	19791.3	28101.8	17147.8	23535.2	26003	17	17	17	1
XP_746747.1	Aspergillus fumigatus Af293	DNA-directed RNA polymerase III subunit Rpc34, putative	4	0.119635	0.182903	1.14207	0.0866143	0.175835	0.858469	0.146766	0.483086	0.878396	0.0666798	0.663154	1.16858	61987.6	75647	75929.2	81959.5	80467.8	80419.3	76790.6	84179.2	81268.4	72366.7	74929.1	61294.1	38	38	38	1
XP_749436.2	Aspergillus fumigatus Af293	cytochrome c subunit Vb, putative	13	0.862174	0.921275	0.994444	0.428655	0.585723	1.04226	0.147216	0.48384	1.0817	0.414232	0.865271	1.03208	2848940	2957063	3133961	2945459	2911066	3028121	2927190	2604499	2736151	3034156	2872745	2709596	725	725	725	1
XP_748409.1	Aspergillus fumigatus Af293	extracellular conserved serine-rich protein	7	0.611437	0.740203	1.05264	0.0163267	0.0793154	1.40573	0.147217	0.483391	1.1552	0.211656	0.75283	0.865036	1575768	1685777	1789546	1491568	1943732	1912471	1679348	1353806	1356327	1931293	2244566	1976017	382	382	382	1
XP_752458.1	Aspergillus fumigatus Af293	ammonium transporter (Mep2), putative	3	0.27155	0.363108	1.13996	0.0121327	0.0702334	1.6203	0.147246	0.483225	1.29007	0.135945	0.729569	0.907624	1028442	745928	853015	1079417	952794	942560	766798	544171	730431	1132307	1031071	1110520	63	63	63	0.9999
XP_752087.1	Aspergillus fumigatus Af293	endosomal cargo receptor (Erp5), putative	10	0.525892	0.660684	1.04776	0.143097	0.249631	1.1631	0.147294	0.482993	1.11604	0.954242	0.994317	1.00536	560116	633466	588962	653527	662723	554984	578506	487069	533521	701290	603275	559105	231	231	231	1
XP_746633.1	Aspergillus fumigatus Af293	conserved hypothetical protein	4	0.539546	0.674592	0.541393	2.47868e-05	0.2	0.115765	0.147461	0.482979	0.194623	0.48317	0.896297	0.910187	16785.8	15161.5	245039	19347.5	25859.3	19779.5	186676	227304	199362	23384.6	27135.4	20682.4	10	10	10	1
XP_752157.1	Aspergillus fumigatus Af293	ribonucleotide reductase large subunit Rnr1, putative	48	0.532773	0.667674	1.02244	0.233445	0.359562	0.912083	0.147477	0.482532	0.917515	0.637844	0.93681	1.02853	811478	868336	792018	841893	816804	867430	968087	879613	848502	776019	909077	777123	1122	1122	1122	1
XP_751303.1	Aspergillus fumigatus Af293	conserved hypothetical protein	3	0.17352	0.24775	1.29711	0.543381	0.698648	2.07102	0.147531	0.482087	3.85802	0.339171	0.819018	2.41633	156754	210751	262427	286160	272902	242274	49829.9	15342.6	197476	261327	235867	21757.3	10	10	10	0.9999
XP_747204.1	Aspergillus fumigatus Af293	C6 finger domain protein, putative	3	0.038338	0.0788966	0.64653	0.615069	0.754203	1.14827	0.147701	0.482627	1.56272	0.44581	0.880543	0.879886	2438170	1978945	2479355	1799282	1527226	1176520	961106	2194134	1486469	1995106	1498050	1587925	9	9	9	0.9991
XP_752664.1	Aspergillus fumigatus Af293	MAP kinase SakA	18	0.0034926	0.0363333	0.928514	0.990955	0.996866	1.00088	0.147896	0.483012	1.11623	0.438424	0.877921	1.03553	332204	329063	326919	312297	300743	304598	277579	277543	333540	315526	296255	275616	246	246	265	1
XP_755992.1	Aspergillus fumigatus Af293	conserved hypothetical protein	5	0.0925894	0.150741	1.17306	0.553998	0.704976	1.06947	0.148361	0.483908	0.842662	0.397788	0.852368	0.924289	71306.2	63639.6	55773.3	74696.6	75838.4	72119.9	84802.8	73152.1	68184.2	68979	82099	91362.3	46	46	46	1
XP_753739.1	Aspergillus fumigatus Af293	NADH-ubiquinone oxidoreductase 9.5 kDa subunit, putative	2	0.496278	0.631071	1.1158	0.534535	0.690509	1.7423	0.148722	0.484688	2.53534	0.495661	0.899262	1.62367	79139.4	91864.6	89218	118166	73933.2	103137	16790.7	25262.9	93827.9	152770	17901	76973	25	25	25	0.999
XP_755307.2	Aspergillus fumigatus Af293	DUF185 domain protein	10	0.780678	0.873158	1.03485	0.351747	0.500955	0.935527	0.14898	0.485346	0.859495	0.640662	0.937085	0.950748	63856	80583.7	61807.4	80999.6	61585.1	70658.7	81245.3	79873.6	77189.3	83971.6	70593.3	69188.2	60	60	60	1
XP_749559.1	Aspergillus fumigatus Af293	mitochondrial inner membrane translocase subunit (TIM17), putative	9	0.00723704	0.0402336	1.82902	0.81431	0.893801	0.944884	0.149028	0.48497	0.738907	0.134785	0.726962	1.43031	126166	171570	120802	239282	242135	276152	236346	180661	151802	198359	225222	122395	165	165	165	1
XP_751993.1	Aspergillus fumigatus Af293	tyrosyl-tRNA synthetase, mitochondrial precursor (tyrosine--tRNA ligase) (tyrrs)	29	0.0331195	0.0716255	1.05225	0.435903	0.592895	0.956368	0.149034	0.484525	0.913066	0.808522	0.976488	1.00461	488517	489313	477433	496984	513904	520613	583296	523726	490771	503612	519434	501327	308	308	308	1
XP_749628.1	Aspergillus fumigatus Af293	Kelch repeats protein, putative	11	0.142138	0.210173	1.12374	0.00739894	0.0605879	1.23664	0.14917	0.484579	1.11916	0.718405	0.949242	1.01699	59636.8	74137.2	67180.1	76500.2	74920.3	73541.2	59017.5	60080.2	59758.2	68515.6	79245.2	73804.4	67	67	67	1
XP_001481645.1	Aspergillus fumigatus Af293	CCCH zinc finger domain protein	3	0.00331738	0.0371542	0.724687	0.330256	0.474702	1.48761	0.149236	0.484484	1.75537	0.428705	0.873022	0.855127	44567.1	50569.8	44502.9	32386.6	33063.6	35647.6	21577.7	17567	48920.1	34927.9	31416.2	55632.3	17	17	17	0.9991
XP_752464.1	Aspergillus fumigatus Af293	ribosomal RNA processing protein, putative	12	0.149895	0.219804	1.06113	0.832436	0.905443	0.99335	0.149819	0.487023	0.950216	0.683839	0.936848	1.01505	120869	120051	116708	134722	122832	122275	119243	126850	130495	124814	121773	127294	119	119	119	1
XP_752151.1	Aspergillus fumigatus Af293	serine-threonine kinase SepH	6	0.0010605	0.0329508	0.360561	0.58157	0.729254	1.35675	0.150399	0.488442	2.32885	0.0924338	0.7	0.618901	36844.3	40856.2	37192.1	13983.7	16732.8	11215.6	7034.77	36352.4	17332.8	32240.2	18430.8	18629.8	30	30	30	1
XP_750741.2	Aspergillus fumigatus Af293	adenylate cyclase AcyA	18	0.31581	0.414644	1.02618	0.421594	0.577534	0.892039	0.150425	0.488285	0.944724	0.544037	0.915688	1.08679	57278.7	58462.4	54476.3	57364.4	58209.7	59034.7	57224.4	61128	61850.2	55214.1	65427.1	42511.4	52	52	52	1
XP_746741.2	Aspergillus fumigatus Af293	DUF1716 domain protein	14	0.505309	0.639613	1.05748	0.00444799	0.056362	0.8293	0.150443	0.487934	0.895666	0.0736581	0.689623	1.1421	45476.2	50968.5	55979.2	49702.1	58449.6	52816.6	58095.1	55053.6	56461.2	48563.6	47859.1	44313.3	104	104	104	1
XP_756016.1	Aspergillus fumigatus Af293	glucosyltransferase	3	0.066141	0.114972	1.18989	0.352611	0.502062	1.0423	0.150567	0.487675	0.89371	0.700117	0.937743	1.02026	80718.4	85410.7	69899.6	93708.6	87575.3	98928.4	84706.2	91138.9	87448.1	93033.1	95828.6	85745.4	58	58	58	1
XP_754918.2	Aspergillus fumigatus Af293	sorting nexin Snx3, putative	8	0.0623767	0.111076	0.963898	0.680515	0.805539	0.975612	0.150765	0.48792	1.04211	0.608893	0.934695	1.02959	907241	905166	899055	887015	847338	879717	833368	867137	902768	890704	764562	889582	165	165	165	1
XP_754923.1	Aspergillus fumigatus Af293	aspartate-semialdehyde dehydrogenase	19	0.00462718	0.0366604	1.19939	0.0541925	0.135892	1.07135	0.150998	0.488673	0.961945	0.0976131	0.707829	1.07691	578494	603953	585856	728885	726544	666884	610685	632738	595115	677934	655605	636210	506	506	506	1
XP_747418.1	Aspergillus fumigatus Af293	hypothetical protein AFUA_8G06170	2	0.135116	0.202132	0.187261	0.000157424	0.0765	0.0760576	0.15125	0.48896	0.92886	0.417025	0.866855	2.28695	239673	274634	266401	16272.9	24639	287189	277566	282898	278652	14926	27995.8	23038.3	7	7	7	0.9991
XP_747785.1	Aspergillus fumigatus Af293	acetylglutamate kinase, putative	53	0.0481217	0.0913189	1.05521	0.86465	0.924222	1.00534	0.151399	0.489141	0.981845	0.418682	0.865956	1.03055	792911	811706	817559	858787	872646	824967	815105	828183	823518	873954	815052	793008	1590	1590	1590	1
XP_755838.1	Aspergillus fumigatus Af293	Rho	18	0.240727	0.325827	0.938978	0.827301	0.901324	0.989359	0.151474	0.48927	1.09531	0.381412	0.85207	1.03954	58098.9	62611.3	62496.2	56795.9	61512.1	53872	60336.4	55565.8	51602.5	54727.7	54604.4	56064.1	143	143	143	1
XP_749301.1	Aspergillus fumigatus Af293	mitochondrial outer membrane translocase receptor (TOM70), putative	40	0.361198	0.472953	1.04612	0.262871	0.393222	0.930653	0.15154	0.489077	0.946997	0.379871	0.852092	1.0645	1083930	1076915	1140609	1073366	1232137	1152560	1189186	1192611	1105414	1138797	1132688	979670	1033	1033	1033	1
XP_754900.1	Aspergillus fumigatus Af293	WSC domain protein, putative	2	0.605884	0.735533	0.855087	0.14784	0.256761	0.488086	0.151822	0.489641	0.498967	0.667062	0.940104	0.87415	20133	9456.98	18698.1	16778.8	10212.2	12990.1	33202.1	17218.9	50127.1	17271.3	9140.73	21107.1	11	11	11	0.9991
XP_750721.1	Aspergillus fumigatus Af293	conserved hypothetical protein	9	0.300149	0.395835	1.07093	0.286472	0.419765	1.15938	0.151845	0.489303	0.900145	0.197149	0.757064	0.831473	1563706	1409565	1421022	1436312	1687878	1586863	1791276	1525886	1571156	1516137	2047001	2156395	64	64	64	1
XP_755670.1	Aspergillus fumigatus Af293	phosphatidylinositol 4-kinase type II subunit alpha, putative	8	0.000220367	0.0122	1.1809	0.152508	0.262112	1.10544	0.151987	0.489291	0.910511	0.315779	0.805286	0.972662	56999.9	59029.6	58168.3	67962.8	68036.8	69703.2	70726	59978.2	61122.8	70687.9	73213.5	67677.6	50	50	50	1
XP_755822.1	Aspergillus fumigatus Af293	pH-signalling protein PalC	8	0.221399	0.30431	1.05649	0.957918	0.97546	1.00446	0.152012	0.488849	0.944395	0.93853	0.992967	0.993319	35815.1	36989.4	37125.2	37720.6	36980.1	41578.5	37175	38182.5	41137.4	35302.9	37284.3	44958.4	38	38	38	1
XP_754515.1	Aspergillus fumigatus Af293	SNARE-dependent exocytosis protein (Sro7), putative	27	0.976207	0.988516	0.998431	0.0324806	0.107768	0.909821	0.152081	0.48869	0.931046	0.627394	0.937364	1.02172	159335	172138	177179	167742	159054	181288	173962	189767	182395	167210	168840	160627	308	308	308	1
XP_746624.2	Aspergillus fumigatus Af293	DNA repair protein (Tof1), putative	7	0.943917	0.970795	0.970354	0.0760784	0.160906	0.251876	0.152312	0.488977	0.339565	0.48651	0.894969	1.30818	11177.1	19101.7	37349	17569.9	28462	14569.2	101479	93101.2	21556.5	15982.7	8693.67	23421.6	8	8	8	1
XP_755213.1	Aspergillus fumigatus Af293	zinc carboxypeptidase, putative	2	0.8654	0.923237	0.974908	0.24096	0.367536	0.680774	0.152375	0.488962	0.807144	0.641875	0.936068	1.15588	24635.1	26076.6	27011.1	25666.4	19713.9	31776	40503.7	27558	29563.3	13348	25185.9	30969.2	16	16	16	0.9991
XP_748141.1	Aspergillus fumigatus Af293	a-pheromone processing metallopeptidase Ste23	48	0.049449	0.0932833	1.07991	0.0317143	0.106864	1.05892	0.152386	0.488522	0.958026	0.34958	0.826881	0.977013	736214	770658	710318	788351	820683	784491	778416	771755	762949	802225	803644	844153	567	567	567	1
XP_747809.1	Aspergillus fumigatus Af293	ankyrin repeat and BTB/POZ domain protein	5	0.102603	0.162907	0.877248	0.695099	0.815995	1.22366	0.152767	0.489986	1.86912	0.422136	0.868769	1.33999	37467.9	38648	42911.5	33404.4	38127.2	32937.5	21277.7	11484.6	38941.1	40184.8	31515.5	13767.1	42	42	42	1
XP_752719.1	Aspergillus fumigatus Af293	spermidine synthase	24	0.00155413	0.0385548	1.25473	0.151961	0.261811	1.1218	0.152952	0.490106	0.934357	0.504274	0.905158	1.04508	1409072	1522187	1496193	1830766	1917342	1805976	1662953	1581773	1495638	1754629	1964381	1611323	1281	1281	1281	1
XP_749139.1	Aspergillus fumigatus Af293	G-patch RNA maturation protein (Gno1), putative	10	0.641067	0.767517	1.03282	0.0877227	0.177325	1.19906	0.15309	0.490014	1.14085	0.817486	0.975625	0.982679	56087.7	58614.3	49367	56140.4	60297.8	52821.2	43266.7	48437.9	52153.7	56000.9	52413.6	64196.5	52	52	52	1
XP_750752.1	Aspergillus fumigatus Af293	mitochondrial protein, putative	13	0.219871	0.302573	1.06619	0.00381279	0.0605445	1.2222	0.153228	0.490152	1.06609	0.156055	0.748264	0.930008	499730	460750	449898	496040	530117	477452	442551	426406	453049	556008	508975	551543	429	429	429	1
XP_756018.1	Aspergillus fumigatus Af293	PHD finger domain protein, putative	7	0.44274	0.572168	0.563591	0.127515	0.230035	2.79215	0.153382	0.489824	2.56323	0.383582	0.854161	0.517384	78644.1	69977.8	64733.5	10477.6	85817	70927.1	21124.1	77182.2	12974.7	86695.8	73570.2	72195.1	20	20	20	1
XP_747838.1	Aspergillus fumigatus Af293	thioesterase family protein	7	0.224008	0.307433	1.13882	0.912494	0.950116	0.987018	0.15352	0.489819	0.839518	0.773939	0.966135	0.968633	83294.8	73934.2	93517.4	89286.1	106790	89207.8	99253.3	112331	87301.3	113882	96713.9	84976.2	84	84	84	1
XP_752701.1	Aspergillus fumigatus Af293	bZIP transcription factor, putative	3	0.255192	0.343886	0.773972	0.162045	0.274245	1.31427	0.153524	0.489381	1.31215	0.261134	0.782449	0.772724	27530.5	25677.6	20656.2	16048	26714.2	15791.9	19619.3	14608.2	22552.2	21328.9	23400.4	29398.8	9	9	9	0.9991
XP_754509.1	Aspergillus fumigatus Af293	mitochondrial protein Fmp25, putative	22	0.217148	0.298306	1.03474	0.0114953	0.068247	1.17258	0.154177	0.491846	1.0592	0.0712459	0.689453	0.934694	111513	110885	110465	114487	119669	110454	111818	101611	101165	126443	120146	121985	296	296	296	1
XP_749732.1	Aspergillus fumigatus Af293	37S ribosomal protein S18, putative	8	0.686507	0.804439	0.984652	0.0310333	0.105904	0.923621	0.154417	0.492646	0.95613	0.611338	0.934613	1.01931	210182	225680	212367	218638	201129	218686	224293	231530	221921	200154	212514	213477	184	184	184	1
XP_756052.1	Aspergillus fumigatus Af293	sorting nexin Mvp1	26	0.761287	0.85982	1.00899	0.374638	0.527458	1.01129	0.154701	0.492806	0.975386	0.356294	0.833789	0.973171	389483	376739	380734	366633	398477	392806	398701	392453	384757	398868	397312	392903	222	222	222	1
XP_753864.1	Aspergillus fumigatus Af293	CCCH and RING finger protein (Znf183), putative	3	0.112322	0.17462	1.49746	0.184245	0.306478	1.93276	0.155704	0.49631	1.74175	0.412669	0.86424	1.34947	46413.1	47291.5	58287	57862.5	107742	68909.2	15939	44964	33784.2	88745.9	56712	34733.7	18	18	18	1
XP_754873.1	Aspergillus fumigatus Af293	mitochondrial metallochaperone Sco1, putative	10	0.180393	0.2547	1.07709	0.0071051	0.0589281	1.34218	0.155908	0.496189	1.12506	0.0272332	0.712358	0.902848	208718	182615	193066	208332	219116	201429	158199	170698	191358	229549	226691	240104	157	157	157	1
XP_751952.1	Aspergillus fumigatus Af293	lysophospholipase Plb1	9	0.127408	0.193459	1.13445	0.00452821	0.0552247	1.48526	0.156267	0.496391	1.15254	0.060508	0.672269	0.880313	283400	238938	246568	268980	294475	307761	204744	212438	250736	315055	326010	347899	114	114	114	1
XP_001481685.1	Aspergillus fumigatus Af293	vacuolar sorting protein SNF7 family protein, putative	15	0.932063	0.963293	1.00374	0.93929	0.96476	1.01043	0.156277	0.49595	0.933937	0.590987	0.932557	0.927755	103609	109976	96402.7	103165	101042	106565	112538	109721	109207	108759	90770.9	140909	75	75	75	1
XP_756039.1	Aspergillus fumigatus Af293	nuclear export protein Noc3	24	0.256415	0.345266	0.963197	0.0172436	0.0797778	0.920999	0.156683	0.496842	0.945755	0.498351	0.901147	0.989087	121471	113924	112072	114683	110053	109806	122620	126704	118004	111900	112711	113562	234	234	234	1
XP_752411.2	Aspergillus fumigatus Af293	conserved hypothetical protein	4	0.143026	0.211671	2.94029	0.717614	0.829629	0.760552	0.157422	0.499429	0.278337	0.901036	0.991178	1.07605	10767.5	25591.2	14784.8	133134	34742.5	22389.1	102107	127801	14478.2	47236.9	33427.9	52638.1	19	19	19	1
XP_752445.2	Aspergillus fumigatus Af293	thioesterase family protein	8	0.152224	0.222054	0.896027	0.00330222	0.0565349	0.629695	0.157502	0.49922	0.868056	0.0149752	0.700778	1.2352	80001.7	98032.6	92331.1	82774.1	78582	80087.3	106727	111552	92986.9	70917.3	65211.2	59771	146	146	146	1
XP_752657.2	Aspergillus fumigatus Af293	conserved hypothetical protein	7	0.0419178	0.0826458	0.905983	0.48428	0.642505	1.03692	0.15754	0.498916	1.08954	0.175533	0.768535	0.951959	389560	389112	359932	353726	347566	330009	320841	356636	368655	376085	357599	349697	54	54	54	1
XP_755312.1	Aspergillus fumigatus Af293	glucose-6-phosphate isomerase	41	0.0208878	0.0579392	1.09296	0.736469	0.842225	1.02131	0.157797	0.49931	0.939624	0.920498	0.988905	1.00554	4330873	4385483	4208296	4698432	4884709	4546904	4611293	4845134	4312299	5074921	4700507	4302641	2427	2427	2427	1
XP_751175.1	Aspergillus fumigatus Af293	nuclear migration protein NudF	17	0.00173934	0.0391902	0.855423	0.801561	0.88534	0.983642	0.157825	0.498868	1.11343	0.171677	0.767849	0.968296	156406	150983	148183	128341	133482	127860	134923	123617	151993	136821	130667	134952	77	77	77	1
XP_746486.1	Aspergillus fumigatus Af293	Patatin-like serine hydrolase, putative	27	0.141093	0.208364	1.08281	0.0282761	0.101156	1.15294	0.157972	0.499049	1.07555	0.829297	0.978614	1.01013	102107	102251	93737	109051	112786	101021	91851.8	87774.5	97564.3	112795	103978	102788	172	172	172	1
XP_750834.1	Aspergillus fumigatus Af293	tetrahydrofolylpolyglutamate synthase, putative	10	0.0111811	0.0453408	0.842553	0.0188826	0.0820284	0.75415	0.158019	0.49868	0.937043	0.571615	0.920717	1.04689	53192.7	53519.5	56805.8	43551.4	48670.2	45633.5	60460.1	59457.8	54676.4	38420	45890.3	47815.9	71	71	71	1
XP_750347.1	Aspergillus fumigatus Af293	ubiquitin ligase complex F-box protein	11	0.960191	0.980041	1.00229	0.193492	0.314349	0.884927	0.158082	0.49824	0.9125	0.67114	0.939137	1.03352	185208	178935	162109	179834	170222	176708	186541	205619	184343	148215	176508	187297	80	80	80	1
XP_755002.1	Aspergillus fumigatus Af293	glutaryl-CoA dehydrogenase, putative	11	0.00373982	0.0355177	0.69099	0.000139779	0.0916667	0.722224	0.158803	0.500441	0.945208	0.148933	0.732932	0.904331	171974	182090	186253	111398	133912	128994	192378	196750	182474	138466	137824	136338	112	112	112	1
XP_752953.1	Aspergillus fumigatus Af293	conserved glutamic acid-rich protein	7	0.294131	0.389446	1.66705	0.135285	0.239921	0.629904	0.159063	0.500623	0.498037	0.378692	0.850663	1.31806	40216.9	13590.1	11230.3	22991	37653.2	32847.8	32026.6	40267.4	38527.6	14446.3	30688.7	28010.8	16	16	16	1
XP_752473.1	Aspergillus fumigatus Af293	serine/threonine protein kinase Kin1, putative	21	0.0780496	0.129495	0.894399	0.0122894	0.0709954	0.791258	0.159099	0.500183	0.908382	0.59213	0.931751	1.02679	69438.3	78043.9	71968.9	67034.8	61273.4	67936.7	73832	85141.9	82773.2	59814.2	66493	64811.6	139	139	139	1
XP_749546.1	Aspergillus fumigatus Af293	chromosome segregation protein Spc105, putative	8	0.263519	0.352892	0.655488	0.0599618	0.141898	0.64791	0.159118	0.499852	1.12735	0.732435	0.954456	1.14054	50176.5	44579.2	40037.5	15542	38673.3	41963.9	37844.3	40600.6	40680.3	32816.8	18769.1	27600.8	27	27	27	1
XP_750409.1	Aspergillus fumigatus Af293	60S ribosome biogenesis protein Rrp14, putative	17	0.311946	0.41109	0.894665	0.676555	0.8031	1.03079	0.159397	0.500249	1.19507	0.551166	0.915196	1.03725	104133	140654	126691	111533	102182	116598	95795.8	114272	99317.2	100453	114823	103235	115	115	115	1
XP_755413.1	Aspergillus fumigatus Af293	Yip1 domain protein	6	0.00141266	0.0383129	0.826805	0.182621	0.304667	0.906452	0.159473	0.500133	1.10253	0.873625	0.987098	1.00565	113119	115228	117758	97824.3	91439.5	96986.4	103258	95753	115834	90636.2	95024.3	99039.9	37	37	37	1
XP_748912.1	Aspergillus fumigatus Af293	small nuclear ribonucleoprotein SmE, putative	6	0.048022	0.0914078	1.33035	0.0981372	0.188142	0.821417	0.159562	0.500277	0.834648	0.0263199	0.7068	1.35178	155494	192047	216764	252571	234140	257722	206371	231705	232816	210826	184776	158388	119	119	119	1
XP_747372.1	Aspergillus fumigatus Af293	MFS sugar transporter Stl1, putative	8	0.163525	0.236314	0.777231	0.0891213	0.17827	0.64355	0.160144	0.501825	0.810129	0.923691	0.989951	0.978413	94676.3	99648.7	112237	104611	69013.2	68863.3	104641	123779	153758	58479.6	94591.2	95957.2	58	58	58	1
XP_755913.1	Aspergillus fumigatus Af293	calcium dependent mitochondrial carrier protein, putative	4	0.816371	0.892256	0.918152	0.300498	0.435561	0.834286	0.160264	0.501872	0.842091	0.844294	0.982997	0.926742	22900.2	31035.5	27996	12924.8	31202.9	38187.2	29425.7	33668.5	33633.2	33211.9	28685.2	20310	21	21	21	1
XP_750921.1	Aspergillus fumigatus Af293	GTP binding protein (SPG1), putative	9	0.0801881	0.133492	1.09257	0.594618	0.738195	0.917888	0.160363	0.501696	0.938434	0.497951	0.9017	1.11703	85377.1	78191.5	85265.9	90032	94703.1	87069.6	89908	90751.6	84413.5	92571.8	95132.6	60481.8	83	83	83	1
XP_753515.2	Aspergillus fumigatus Af293	translation initiation factor eIF-2B alpha subunit, putative	17	0.0948572	0.153871	0.9667	0.15685	0.267879	0.958813	0.160489	0.501603	1.02577	0.243951	0.770714	1.03421	215734	225394	216983	212176	209302	214630	215336	214612	211526	211173	195694	208506	241	241	241	1
XP_749402.1	Aspergillus fumigatus Af293	DUF1295 domain protein	10	0.0120031	0.0460071	1.32681	0.388758	0.542339	1.03622	0.16059	0.501728	0.90149	0.0305247	0.721205	1.1543	164959	150935	139135	187836	198449	217073	158934	166093	179123	169894	175930	176019	158	158	158	1
XP_752212.1	Aspergillus fumigatus Af293	RSC complex subunit Sfh1, putative	19	0.487672	0.622615	0.979634	0.610051	0.749381	1.02347	0.160737	0.501873	1.06981	0.484325	0.897878	1.02399	94681.7	89427.7	87396	90683.8	86824.8	88358.3	89764.7	80806	83321.2	83716.4	84583.6	91502.9	147	147	147	1
XP_754662.1	Aspergillus fumigatus Af293	conserved hypothetical protein	8	0.00859544	0.0406799	0.867933	0.779689	0.871507	1.0158	0.161341	0.503477	1.09068	0.0957308	0.709392	0.931906	74834.5	69555.9	70423.3	61905.9	60226.3	64282.4	61485.9	64189.8	71585	68347.6	63224.2	68531	95	95	95	1
XP_752872.1	Aspergillus fumigatus Af293	SDA1 domain protein	12	0.363256	0.47517	1.07161	0.0581651	0.141033	0.82309	0.161562	0.503641	0.882855	0.113436	0.706524	1.14942	75430.7	88393	72228.1	87445.4	79590.8	85150.4	83189.9	95167.4	88398.5	73750.8	81102.6	65244.4	100	100	100	1
XP_752164.1	Aspergillus fumigatus Af293	Glutamate/Leucine/Phenylalanine/Valine dehydrogenase, putative	46	0.0052608	0.0386783	1.16834	0.00843858	0.0624186	1.25816	0.161726	0.503426	1.07182	0.906289	0.991314	0.995297	7009662	7450447	7312384	8702368	8618830	8119992	7151524	6860267	6321690	8961734	8553152	8058690	3575	3575	3575	1
XP_750406.1	Aspergillus fumigatus Af293	40S ribosomal protein S2, putative	12	0.0277178	0.0650721	1.15283	0.00482733	0.0537908	1.20281	0.161831	0.503604	1.07939	0.308089	0.798735	1.03454	567113	582355	518344	626899	670126	624337	542681	495984	505743	601616	639684	615533	219	219	219	1
XP_748145.1	Aspergillus fumigatus Af293	glyceraldehyde 3-phosphate dehydrogenase	31	0.813376	0.891016	0.983115	0.83789	0.909998	1.02782	0.161963	0.50366	1.06804	0.884029	0.987442	1.02159	9763232	10886640	10210460	9657628	11371480	9389834	9237570	9956095	9685593	12580640	9219171	8339247	3237	3212	3237	1
XP_750535.1	Aspergillus fumigatus Af293	rRNA processing protein (Rrp20), putative	10	0.2847	0.378136	1.094	0.0408985	0.122238	1.32443	0.162107	0.503844	1.13627	0.532732	0.912292	0.938571	120879	119115	97891.5	118784	129138	120308	100493	102884	92925.6	122414	116940	155924	92	92	92	1
XP_754940.1	Aspergillus fumigatus Af293	NIPSNAP family protein	17	0.539772	0.674808	1.04662	0.697667	0.817966	0.934466	0.162676	0.505754	0.815644	0.523246	0.90852	0.913541	55799.6	53010.7	52746	55687.7	50608.6	63470.7	52677.2	69605.2	78418.3	50288.2	73841.7	63183.7	179	179	179	1
XP_749280.1	Aspergillus fumigatus Af293	mitochondrial carrier protein, putative	9	0.241173	0.326381	0.978855	0.604438	0.74464	1.05893	0.162681	0.505316	1.09804	0.873006	0.987013	1.01501	91493.8	87590.7	88655.9	88842.4	86714.6	86496.7	78406.5	75860.3	90226.7	88839	73029.1	98221.4	55	55	55	1
XP_750505.2	Aspergillus fumigatus Af293	Cupin domain protein	9	0.123959	0.188452	0.914624	0.079597	0.166209	0.873648	0.162753	0.50501	0.915836	0.471027	0.890103	0.958791	50698.6	55850	48148.6	48005.6	47515.8	45729.9	57402.9	58103.7	53212.1	44383.1	52172.4	51109.3	41	41	41	1
XP_753563.1	Aspergillus fumigatus Af293	RNA helicase-like splicing factor (HRH1), putative	19	0.823974	0.89841	1.02357	0.13043	0.233658	0.658908	0.163059	0.50531	0.878593	0.24484	0.769173	1.36484	58615.5	74898.5	67157.5	68836.8	60283.9	76192.1	76888.8	78635.5	71901	55964.9	67869	32741.9	128	128	128	1
XP_750143.1	Aspergillus fumigatus Af293	translation regulator (Cya5), putative	3	0.7153	0.82415	0.864109	0.0976596	0.187748	0.628099	0.163114	0.505088	0.574696	0.453934	0.882159	0.790639	11879	27893.1	16603.4	8746.49	19825.3	20470.5	29754.1	44782	21752.6	18809.8	21414.5	17830.1	12	12	12	1
XP_749926.1	Aspergillus fumigatus Af293	integral membrane protein	2	0.0392956	0.0801098	0.363291	0.968614	0.981896	1.02149	0.163688	0.506247	2.13943	0.54524	0.91626	0.760881	40092.4	65781.4	56044.2	26261.8	25714.4	10494.4	13240.3	20643.9	55222.2	18002.3	44272.1	20186	8	8	8	0.9991
XP_749761.1	Aspergillus fumigatus Af293	replication protein A 70 kDa DNA-binding subunit	24	8.35152e-05	0.0202222	0.916409	0.029493	0.101902	0.906624	0.163781	0.506366	1.02206	0.297138	0.795005	1.03309	157140	155988	155561	142027	144221	143267	152355	149870	156416	141169	143427	131451	308	308	308	1
XP_748733.1	Aspergillus fumigatus Af293	Ser/Thr protein phosphatase family	11	0.953954	0.97684	0.983803	0.505879	0.662161	1.20413	0.163856	0.506198	1.67648	0.205109	0.75677	1.36972	757214	1694303	773441	1001756	1000948	942298	784989	473651	566399	1078186	618714	551171	67	67	67	1
XP_751548.1	Aspergillus fumigatus Af293	class II aldolase/adducin domain protein	14	0.0520002	0.0973221	1.13722	0.394753	0.548833	0.946695	0.164291	0.506802	0.922066	0.146699	0.735506	1.10763	584706	673546	665016	742879	729495	710768	707801	701128	673197	706766	680621	589251	384	384	384	1
XP_755582.1	Aspergillus fumigatus Af293	MFS multidrug transporter, putative	3	0.16816	0.240364	1.26037	0.362	0.513329	0.811379	0.164376	0.506555	0.785141	0.377303	0.850034	1.21961	269918	420593	313444	379200	432906	433996	393877	469662	397433	373491	450096	233612	25	25	25	0.9991
XP_753595.1	Aspergillus fumigatus Af293	molybdenum cofactor biosynthetic protein (CnxF), putative	4	0.329138	0.430994	0.734438	0.188748	0.31122	1.92492	0.164436	0.506495	2.00622	0.400207	0.854705	0.765459	46507.3	24584.6	25622.2	21931.3	31750.8	16666.7	29974.5	13482.5	8977.28	45326.5	23142.7	24668.2	5	5	5	0.9999
XP_752759.1	Aspergillus fumigatus Af293	U4/U6 small nuclear ribonucleoprotein, putative	15	0.0852146	0.141084	0.911389	0.224061	0.349494	0.925776	0.164754	0.506888	1.02523	0.894968	0.989739	1.00929	77681.2	77386.6	78463.8	70488.4	76338.1	66359.4	75529.2	77973.1	74324.5	67432.4	66104.8	77912.5	107	107	107	1
XP_753895.1	Aspergillus fumigatus Af293	60S ribosome biogenesis protein Sqt1, putative	15	0.2448	0.331545	0.978286	0.107414	0.199532	0.87741	0.164931	0.507273	0.962895	0.311277	0.802837	1.0736	251470	255716	261616	256330	247065	248710	271982	270464	256166	212120	260934	229966	212	212	212	1
XP_748958.1	Aspergillus fumigatus Af293	RSC complex subunit (RSC8), putative	42	0.626134	0.754475	0.973132	0.073279	0.158035	1.09962	0.164988	0.507236	1.0608	0.313671	0.803972	0.938779	337268	324087	346036	298771	352274	331172	322090	298945	329071	330635	352632	361338	488	488	488	1
XP_746614.1	Aspergillus fumigatus Af293	histone deacetylase HosB	4	0.631346	0.7589	1.70307	0.530138	0.685902	0.434503	0.165435	0.508798	0.214203	0.899829	0.992249	0.839582	26049.6	26664.7	14431.9	15827	272612	11476.6	241624	17081.6	247126	15587.9	23791.1	225614	12	12	12	0.9999
XP_001481507.1	Aspergillus fumigatus Af293	cytochrome c oxidase assembly protein (Pet191), putative	7	0.00189546	0.0387674	0.727525	0.419688	0.575384	0.888117	0.165491	0.50864	1.24354	0.743893	0.956997	1.01868	102841	108124	102023	72285.6	82100.3	73609.5	104542	83915.8	67246.7	72748	71210.1	79772.3	77	77	77	1
XP_751492.1	Aspergillus fumigatus Af293	actin-related protein ArpA	15	0.467531	0.601648	1.04868	0.00334864	0.0570743	0.845564	0.165542	0.508308	0.929831	0.0434252	0.680407	1.15319	126824	145024	142503	150962	133010	150535	146329	147861	150684	130525	126250	119609	236	236	251	1
XP_749101.1	Aspergillus fumigatus Af293	phospho-2-dehydro-3-deoxyheptonate aldolase	19	0.0146658	0.048981	0.896681	0.226343	0.352447	0.939971	0.165801	0.508485	1.05937	0.793746	0.971352	1.01058	903401	888071	851352	821383	771666	776921	881234	807453	807392	737212	823423	785997	568	568	603	1
XP_750841.1	Aspergillus fumigatus Af293	lipase/esterase family protein	3	0.769059	0.864359	0.909031	0.0887232	0.178367	0.822912	0.166063	0.509177	0.696829	0.323458	0.807935	0.769753	14182.4	24213.5	28798.7	26140.9	12797.8	22205.6	30147.7	31568.6	30710.9	25718.8	21693.6	29193.1	21	21	21	0.9999
XP_754645.1	Aspergillus fumigatus Af293	integral plasma membrane protein, putative	19	0.00254172	0.0394118	1.12688	0.0018333	0.0534414	1.19761	0.166091	0.508743	1.02976	0.273152	0.783326	0.968942	218438	228900	218451	251347	245901	252885	218087	212460	215880	257864	268785	247896	202	202	202	1
XP_746780.1	Aspergillus fumigatus Af293	BolA domain protein	6	0.00702362	0.0398133	0.521232	0.00916596	0.0637901	0.642475	0.166098	0.50831	1.06991	0.408624	0.861407	0.868009	273702	261416	241883	159408	106136	144857	238650	236704	250150	130209	177652	162004	69	69	69	1
XP_750990.1	Aspergillus fumigatus Af293	FAD synthetase, putative	5	0.294109	0.389601	0.719251	0.590904	0.73565	0.85999	0.166664	0.509964	1.2106	0.974069	0.995966	1.01248	23468.7	25063.2	28073.4	10965.4	20681.3	27093.2	17241.8	22679.6	23801.4	18692.6	11790.7	26859.2	25	25	25	1
XP_749709.1	Aspergillus fumigatus Af293	IdgA domain protein	25	0.0971437	0.156186	1.08672	0.409036	0.56337	1.03644	0.166722	0.509633	0.93517	0.629219	0.936416	0.980533	190374	214173	203153	219707	226942	213201	214660	224881	209806	239139	214279	220054	285	285	285	1
XP_755682.1	Aspergillus fumigatus Af293	KH domain protein	20	0.019698	0.0556562	0.884166	0.144548	0.251811	0.967595	0.166965	0.510117	1.05353	0.14572	0.733027	0.962694	84257.9	77239.6	77194.9	70622.6	71936.6	68351.4	74928.1	77029.8	74437.4	73916.5	70881.7	74284.9	120	120	120	1
XP_750029.2	Aspergillus fumigatus Af293	class V chitinase, putative	2	0.740486	0.845412	1.12907	0.137359	0.242484	1.6637	0.167108	0.510241	1.57887	0.851038	0.985077	1.0715	26194.9	19861.5	17965.2	12536.8	35170.4	30511.2	11682.9	9453.7	21501.7	18332.2	21462.6	27794	4	4	4	0.9989
XP_750368.2	Aspergillus fumigatus Af293	histone H4 arginine methyltransferase RmtA	18	0.00276371	0.0385273	1.21617	0.133787	0.23781	1.09705	0.167281	0.510585	0.926542	0.494296	0.899993	1.02714	508420	502260	474961	627295	594566	584946	552885	559228	493164	566185	620480	573077	494	494	494	1
XP_753251.1	Aspergillus fumigatus Af293	Rho	4	0.942345	0.9698	0.996836	0.601026	0.742639	0.803881	0.167391	0.510386	1.26926	0.276674	0.783383	1.57392	78772.7	80432.9	78955.2	73087.5	81125.9	83571.5	47247.2	69730.7	74257.1	75055.6	68810.3	24608	39	39	39	1
XP_750340.1	Aspergillus fumigatus Af293	DnaJ and TPR domain protein	38	0.00272742	0.0385116	0.904754	0.460404	0.618956	0.959988	0.167401	0.509954	1.05087	0.834438	0.977973	0.990408	347702	351038	361809	324794	320152	314535	324212	354458	331130	317865	302887	349676	453	453	454	1
XP_751764.1	Aspergillus fumigatus Af293	4-hydroxyphenylpyruvate dioxygenase, putative	25	0.00360586	0.0369594	1.15776	0.439573	0.594873	1.05868	0.167746	0.510572	0.896874	0.533824	0.911093	0.980811	232670	238267	233642	261244	282688	272182	294574	258147	236102	286081	276091	269722	428	428	428	1
XP_750390.1	Aspergillus fumigatus Af293	nuclear localization protein NPL6, putative	15	0.00281186	0.0378393	0.871337	0.277917	0.410675	0.915111	0.168467	0.513058	0.953992	0.231672	0.766182	0.908358	92990.6	88455.1	87977.1	79808.2	76703.8	78203.2	97851.6	93869.1	90741.7	76478.7	86519.4	96530.5	126	126	126	1
XP_751475.1	Aspergillus fumigatus Af293	OTU-like cysteine protease, putative	8	0.336015	0.437755	0.974285	0.0380756	0.118537	0.906209	0.168541	0.513091	0.954945	0.419448	0.866767	1.02668	76885.4	72293.9	72088.9	71771.6	73271	70467.3	74589.8	77989.6	79097.4	67157.4	69252.1	73627	83	83	83	1
XP_754535.1	Aspergillus fumigatus Af293	zinc knuckle transcription factor/splicing factor MSL5/ZFM1, putative	18	0.0284044	0.0655183	0.876789	0.0137634	0.0758707	0.811493	0.168638	0.512918	0.942166	0.751357	0.959891	1.01798	379474	379922	371943	335623	350390	307350	397046	426666	378478	321619	307054	346951	189	189	189	1
XP_750610.1	Aspergillus fumigatus Af293	conserved hypothetical protein	7	0.548212	0.683053	0.967088	0.156293	0.267221	0.882479	0.169272	0.514651	0.888199	0.633387	0.936798	0.973356	56765.7	63009.3	59705.7	57233.1	62365	54114.9	61027.4	75920.1	65780.2	58122.2	63279.2	56949.1	49	49	49	1
XP_750488.1	Aspergillus fumigatus Af293	SNARE complex subunit (Bet1), putative	5	0.0883926	0.145487	0.820635	0.569043	0.718404	1.05771	0.169354	0.514409	1.12802	0.268737	0.782638	0.875187	65676.6	53419.2	63285.9	51344.7	54130	44150.1	56063	50239.1	54921.3	60222.3	48103.2	63187.7	38	38	38	1
XP_749245.1	Aspergillus fumigatus Af293	DNA helicase, putative	8	0.241055	0.326386	0.840111	0.035114	0.113154	0.701149	0.169409	0.514192	0.781836	0.486978	0.895127	0.936789	50978.6	41281.3	36088.1	40882.6	31326.1	35161.8	67065.4	47869	49500.1	38762.4	39957	35366.1	22	22	22	1
XP_746489.1	Aspergillus fumigatus Af293	conserved hypothetical protein	4	0.0666883	0.115198	0.86467	0.0142507	0.0765137	0.703795	0.169598	0.514143	0.908317	0.266779	0.782962	1.11594	44106.7	39852.9	41001.1	38453	32650.3	37110.2	49576	46304.9	41893.8	32541.6	28485.9	36167.4	17	17	17	1
XP_746605.1	Aspergillus fumigatus Af293	conserved hypothetical protein	5	0.165641	0.237447	0.935739	0.135734	0.240288	1.15007	0.169784	0.514457	1.07912	0.142315	0.72736	0.878008	213973	192496	209769	183826	197332	195156	186688	182012	202349	247445	195816	215857	60	60	60	1
XP_756003.2	Aspergillus fumigatus Af293	tRNA nucleotidyltransferase	15	0.0370424	0.0770966	1.20396	0.701317	0.820185	1.02434	0.169807	0.514227	0.883728	0.393378	0.853444	1.0387	85218.5	94215.2	76476.6	101687	102438	102872	103299	89074.1	96689.7	92603	97367.9	106052	77	77	77	1
XP_754719.1	Aspergillus fumigatus Af293	AP-1 adaptor complex subunit beta, putative	27	0.175822	0.250429	1.04069	0.151245	0.260965	1.04614	0.16986	0.514225	1.05057	0.0828996	0.697903	1.04509	227709	239066	226977	235029	237969	248997	223692	209796	227070	230634	226959	233079	407	407	407	1
XP_746698.1	Aspergillus fumigatus Af293	L-PSP endoribonuclease family protein (Hmf1), putative	7	0.11905	0.181829	1.36458	0.759219	0.856132	0.954414	0.169969	0.513881	0.759515	0.570286	0.919727	1.08592	285057	387232	487341	524104	530629	491496	498113	545517	451845	566660	513142	367093	225	225	225	1
XP_753503.1	Aspergillus fumigatus Af293	TFIID and and SAGA complex TAF10 subunit, putative	4	0.000433707	0.027	0.852328	0.111636	0.205919	0.751289	0.170525	0.515806	0.911985	0.806489	0.975761	1.03464	37814.5	37146.2	37393.7	31049.2	32239.4	32490.3	36804.1	43728.7	43027.5	35815.4	23844.1	34385.8	33	33	33	1
XP_753840.1	Aspergillus fumigatus Af293	C2H2 finger and ankyrin domain protein, putative	7	0.222819	0.305305	1.07913	0.498044	0.654614	1.0573	0.170662	0.515742	0.913259	0.394286	0.851457	0.932111	41327.5	45023.8	40112.5	43010.3	44413	49101.9	48171.3	42392.4	47984.7	43582.3	49224.2	53987.2	44	44	44	1
XP_751136.1	Aspergillus fumigatus Af293	anthranilate synthase component I, putative	21	0.129786	0.195853	1.03925	0.0435597	0.125086	0.955521	0.170701	0.515512	0.969262	0.0386807	0.712968	1.0542	2146686	2282282	2230952	2338745	2265016	2316006	2272542	2281953	2314650	2125756	2209983	2229062	419	419	419	1
XP_755088.1	Aspergillus fumigatus Af293	leukotriene A4 hydrolase	22	0.0208847	0.0580159	1.11371	0.00150988	0.0525652	1.15632	0.170829	0.515863	1.03855	0.992005	0.998254	1.00028	193503	190359	201169	213159	227750	210853	193531	183674	186098	220618	217707	212944	296	296	296	1
XP_751558.1	Aspergillus fumigatus Af293	tRNA (adenine-N(1)-)-methyltransferase	6	0.0866233	0.142594	1.77003	0.300058	0.435049	0.655228	0.170967	0.515636	0.629522	0.189378	0.756824	1.70059	57153.9	31156	25383.6	57898.9	71872.9	60234.8	54253.9	46013.2	72576.3	42840.9	60195.8	19763.4	19	19	19	1
XP_755201.1	Aspergillus fumigatus Af293	acetyl-CoA carboxylase	159	0.0448529	0.0863808	1.07109	0.358674	0.508608	0.937803	0.171113	0.51582	0.93623	0.27734	0.78385	1.06929	1141028	1166779	1161395	1256229	1276893	1184445	1277942	1290224	1142722	1268514	1137962	1076537	4909	4909	4909	1
XP_750168.1	Aspergillus fumigatus Af293	IQ and HECT domain protein	15	0.0105121	0.0433074	0.889395	0.0501734	0.1301	0.892157	0.171275	0.515783	1.06201	0.153732	0.738436	1.05872	50527.9	48683.3	47140.6	42051.2	43655.1	44440.4	43243.4	47483.9	47147	42945.7	38967.4	41079.4	57	57	57	1
XP_750229.1	Aspergillus fumigatus Af293	protein phosphatase PP1 regulatory subunit Sds22, putative	13	0.104816	0.165217	1.15895	0.0196183	0.0836401	1.14529	0.171284	0.515354	0.954954	0.668542	0.939586	0.966337	121014	115944	113468	120950	152970	133949	127207	120756	119012	144209	131944	144338	143	143	143	1
XP_752007.1	Aspergillus fumigatus Af293	ribosome biogenesis protein Pescadillo, putative	17	0.00455468	0.0362013	1.08142	0.469732	0.628591	0.97191	0.171482	0.515434	0.948149	0.062722	0.671195	1.05498	219205	222901	214917	240937	234684	234868	228582	244440	220489	222509	218334	232815	256	256	256	1
XP_747224.1	Aspergillus fumigatus Af293	conserved hypothetical protein	10	0.0101799	0.0431235	0.763619	0.252637	0.381686	0.855414	0.171617	0.515305	1.1109	0.945453	0.993505	0.991688	73384.8	65235.4	76021.1	52949.4	52215.1	58613.4	60651.5	69920.5	62597	49937	48721.4	68294.6	58	58	58	1
XP_753974.1	Aspergillus fumigatus Af293	SNF2 family helicase, putative	22	0.175408	0.249956	0.909015	0.139138	0.244227	0.892336	0.171995	0.516309	0.961901	0.815299	0.97621	0.97988	55846.2	60146.1	57546.7	55740.2	47199	55186.8	59339.1	59831.1	61173.5	47975.1	54310	59227.1	141	141	141	1
XP_751836.1	Aspergillus fumigatus Af293	cell wall biogenesis protein Ecm15, putative	3	0.841116	0.911076	1.03785	0.059835	0.142047	0.416105	0.172654	0.518669	0.784443	0.127232	0.70877	1.95656	34931	52127.8	55413.1	54744.5	39997	51514.3	58001.7	58066.2	62064.7	43742.5	25197.5	13663.3	21	21	21	1
XP_746597.1	Aspergillus fumigatus Af293	SAC3/GANP domain protein	6	0.0050256	0.0388214	0.855353	0.0163336	0.0791631	0.708064	0.172844	0.518945	0.882267	0.277359	0.783276	1.06579	25774.8	28051.5	27039.6	22453.1	23488.9	23198	29391.5	35067.8	27619.9	21451.3	23617	19947.6	20	20	20	1
XP_754411.1	Aspergillus fumigatus Af293	trehalose synthase (Ccg-9), putative	30	0.558463	0.694365	0.936812	0.109717	0.203755	0.894932	0.172884	0.518515	0.896369	0.540114	0.913686	0.938317	193967	156978	187158	187833	143945	173286	201112	201092	195650	160284	188643	187565	473	473	473	1
XP_748146.1	Aspergillus fumigatus Af293	phosphate transporter (Pho88), putative	17	0.670891	0.792542	1.02381	0.19627	0.317245	1.23894	0.173394	0.519381	1.23507	0.796582	0.9716	1.02061	1223765	1425919	1339198	1323722	1323884	1431035	1346608	1028022	896028	1185159	1321195	1506505	386	386	386	1
XP_752603.1	Aspergillus fumigatus Af293	carnitine acetyl transferase	20	0.614965	0.74407	1.01487	0.33054	0.475108	0.929623	0.173617	0.519944	0.914753	0.978068	0.995391	0.998636	86168	83097.5	79301.4	82006.9	85464.6	84685.5	82244.7	94131.9	95820.7	81110.6	92030.7	79838.9	160	160	160	1
XP_749386.1	Aspergillus fumigatus Af293	TORC1 growth control complex subunit Kog1, putative	23	0.0304027	0.068231	0.934462	0.12229	0.223825	0.870355	0.173735	0.520086	0.967795	0.619203	0.936082	1.03908	66464.8	70319.3	67155.2	64933	62971.4	62635.6	71491.1	69183.1	70007.2	65184.7	65954	53100.4	129	129	129	1
XP_754941.1	Aspergillus fumigatus Af293	aminoalcoholphosphotransferase	4	0.199065	0.276462	1.06421	0.27782	0.410492	1.08863	0.173821	0.519855	1.0924	0.320247	0.808084	1.0679	138694	131053	123102	139827	144064	133878	114221	115683	129901	142794	130877	118493	62	62	62	1
XP_751204.1	Aspergillus fumigatus Af293	lipid transfer protein, putative	4	0.601622	0.732343	0.935149	0.234989	0.360682	0.78785	0.173887	0.519521	0.860978	0.913159	0.990579	1.02195	138914	166978	157231	128480	130662	177664	162713	206242	170283	112151	131756	189116	29	29	29	1
XP_752393.1	Aspergillus fumigatus Af293	pyridoxal reductase (AKR8), putative	12	0.36645	0.478716	1.07995	0.306757	0.44348	0.917036	0.173928	0.519093	0.843306	0.781918	0.968899	0.993124	162534	167318	132936	158683	170267	168533	200588	190753	157544	164949	169355	166412	153	153	153	1
XP_755734.1	Aspergillus fumigatus Af293	conserved hypothetical protein	7	0.54338	0.677805	0.69315	0.191969	0.314019	2.08242	0.173934	0.518666	2.21235	0.602089	0.935305	0.736395	19336.1	88129.3	44766.8	28527.4	16689.6	53360.4	13426.1	19829.8	26461.8	20169.1	86952.3	36276.7	18	18	18	1
XP_748068.1	Aspergillus fumigatus Af293	alpha-1,2-mannosyltransferase (Ktr4), putative	19	0.0140424	0.0485172	1.09605	0.263163	0.393273	1.05672	0.173972	0.518239	0.974999	0.816372	0.976107	1.01128	215078	210936	209398	241342	225128	230222	217275	222174	212327	246840	228182	214730	326	326	326	1
XP_754179.1	Aspergillus fumigatus Af293	Pyridoxal-phosphate dependent enzyme, putative	15	0.00739927	0.0406554	0.903075	0.0239224	0.0940031	0.881882	0.174189	0.51872	0.968672	0.833538	0.97692	0.99195	123073	122353	123449	115082	110844	107330	129530	129233	122178	109843	107592	118691	129	129	129	1
XP_001481671.1	Aspergillus fumigatus Af293	GYF domain protein	47	0.00227827	0.0360628	0.88013	0.539152	0.694345	0.947989	0.174235	0.518393	1.08114	0.957943	0.993358	1.00375	237869	230505	228903	199212	209093	205426	228719	220885	196587	192704	189225	232041	481	480	481	1
XP_753569.1	Aspergillus fumigatus Af293	topisomerase II associated protein (Pat1), putative	28	0.00280565	0.038009	0.718886	0.170214	0.284959	0.815889	0.174505	0.518427	1.11199	0.867744	0.986532	0.979786	241120	272233	258558	194788	172444	187716	255958	226278	213114	155430	190109	226871	324	324	324	1
XP_754044.1	Aspergillus fumigatus Af293	acyltransferase, putative	7	0.00292963	0.0372479	1.21028	0.438701	0.594518	0.776528	0.174521	0.5181	0.884414	0.325076	0.809171	1.37843	52726.9	55093.5	57361	68584	66524.1	64745.3	54050.7	66494.7	67018.4	65864.2	62733.8	27296.2	29	29	29	1
XP_752335.2	Aspergillus fumigatus Af293	Golgi traffic protein SFT2, putative	4	0.291676	0.385942	0.930532	0.322287	0.466403	0.487098	0.174579	0.517872	0.923374	0.42423	0.870276	1.76397	94509	90796.6	89205.2	94514.1	83937.7	77745.2	108322	93555.4	95943.6	97562.3	84928.6	13561.7	40	40	40	1
XP_752586.1	Aspergillus fumigatus Af293	GTP-binding protein Sey1, putative	45	0.244608	0.331436	1.02789	0.0761397	0.16089	1.07383	0.174612	0.517704	1.03795	0.829425	0.977895	0.993542	438088	425187	440606	433526	447307	459632	405603	416864	434082	450387	432008	467083	479	479	479	1
XP_752184.1	Aspergillus fumigatus Af293	pH signal transduction protein PalA, putative	15	0.0183665	0.0538764	0.863095	0.0627391	0.145518	0.771822	0.174796	0.518069	0.911128	0.849372	0.984549	1.01887	52147.6	56770.8	55018	49941.4	46095.1	45490.9	65866.6	59069.4	55347.6	47290.4	53188.4	39363	93	93	93	1
XP_747657.1	Aspergillus fumigatus Af293	mannosyl-oligosaccharide glucosidase, putative	28	0.00215728	0.0368342	1.15342	0.464822	0.622622	1.02745	0.174903	0.51791	0.95207	0.0592662	0.66684	1.0688	168169	169028	178554	196475	197389	200822	180490	187794	173512	189255	190854	176605	263	263	263	1
XP_754488.1	Aspergillus fumigatus Af293	hypothetical protein AFUA_3G11310	8	0.713077	0.823543	0.886563	0.57669	0.725342	1.32565	0.174942	0.517572	1.9837	0.485737	0.896219	1.32665	26765.8	67336.7	52487.1	31127.4	46596.1	45448.8	23378.5	39047.1	13275.6	15496	48022.2	37938.7	50	50	50	1
XP_754802.1	Aspergillus fumigatus Af293	PWI domain mRNA processing protein, putative	4	0.244241	0.331028	1.11532	0.930109	0.959709	0.962124	0.175001	0.517496	1.33021	0.322413	0.808456	1.54202	42029.9	50992.8	40079.9	52322	47209.6	48248.2	36401.3	41045.1	24426	40715.3	52964.1	15072.5	29	29	29	1
XP_752136.1	Aspergillus fumigatus Af293	asparagine synthetase Asn2, putative	28	0.160541	0.232976	1.03785	0.467949	0.626133	0.966927	0.175601	0.51894	0.950783	0.601425	0.936428	1.02052	851707	871395	877622	932257	871267	896445	946070	931020	860372	912720	903911	830398	1099	1099	1099	1
XP_753416.1	Aspergillus fumigatus Af293	mitochondrial oxaloacetate transporter (Oac), putative	19	0.379075	0.494475	1.03913	0.00339966	0.0584181	1.16459	0.175702	0.518517	1.06244	0.123023	0.70691	0.947989	259772	254828	231267	265188	252189	256855	231356	232360	237462	277712	259906	279349	286	286	286	1
XP_752894.1	Aspergillus fumigatus Af293	autophagy protein Atg27, putative	15	0.0162062	0.0500924	1.06098	0.788499	0.876685	0.988487	0.176229	0.519599	0.935577	0.783467	0.969166	1.00419	188520	194552	189895	198225	205909	203793	188678	213444	211185	205246	200264	199850	158	158	158	1
XP_749639.2	Aspergillus fumigatus Af293	conserved hypothetical protein	7	0.164292	0.236201	0.815072	0.844577	0.913184	0.925389	0.176702	0.520264	1.73297	0.0999207	0.713538	1.52638	37618.3	55728.8	46580.8	40487.4	36842.6	35448.9	25164.8	15834	47090.2	30867.2	16704.2	28837.9	12	12	12	1
XP_750185.1	Aspergillus fumigatus Af293	ribosome assembly and transport protein Srp40, putative	5	0.177735	0.252228	1.06241	0.118942	0.218783	0.882328	0.176737	0.519841	0.931812	0.124245	0.706181	1.12199	465570	479048	488882	473978	523944	526498	475503	546847	518280	455591	414599	490084	116	116	116	1
XP_746772.2	Aspergillus fumigatus Af293	conserved hypothetical protein	12	0.217423	0.298568	1.48022	0.23449	0.360169	0.737578	0.176971	0.520559	0.650485	0.300258	0.792885	1.30544	12374.2	28632.6	25269.7	29311.6	28599.4	34638.8	30324.5	33202.8	32307.1	32294.1	25944.9	15578.1	21	21	21	1
XP_747711.1	Aspergillus fumigatus Af293	onanonoxo-7-onima-8-eninoihtemlysoneda	24	0.0259847	0.0634081	1.08375	0.342603	0.490081	1.04779	0.176977	0.520136	0.936243	0.320925	0.808223	0.968371	128221	124411	123711	138273	139200	130508	139324	124001	139191	145955	137009	138331	335	335	335	1
XP_755080.1	Aspergillus fumigatus Af293	thioesterase family protein	3	0.122931	0.187838	1.2066	0.254253	0.383244	0.76193	0.177071	0.519828	0.750558	0.292194	0.793937	1.18859	118927	147690	110101	162439	142970	146279	223175	151648	135141	122404	162720	101572	33	33	33	1
XP_749089.1	Aspergillus fumigatus Af293	cyclopropane-fatty-acyl-phospholipid synthase, putative	38	0.00136757	0.0374085	1.26638	0.515534	0.671909	1.05815	0.177511	0.520149	0.890293	0.240817	0.775232	1.06549	739595	725693	723634	871941	950355	951876	939109	791454	740500	886838	909594	808380	894	894	894	1
XP_749471.1	Aspergillus fumigatus Af293	polarized growth protein (Boi2), putative	10	0.320573	0.421443	0.705642	0.173626	0.290094	1.09143	0.177891	0.521056	1.10146	0.33029	0.811327	0.71213	38083.6	42454.3	46228.2	39024.5	41427.4	16244.1	37154	37986	39630.5	41742.5	38314.2	45467.6	26	26	26	1
XP_749240.1	Aspergillus fumigatus Af293	formaldehyde dehydrogenase	24	0.0548576	0.101537	0.882619	0.0238622	0.0937266	0.789795	0.178853	0.523964	0.936178	0.555628	0.915413	1.04621	1155582	1225141	1146114	1034450	966573	1115809	1176919	1267857	1325326	973592	1102379	907768	628	628	628	1
XP_750779.1	Aspergillus fumigatus Af293	ATP dependent RNA helicase, putative	16	0.246738	0.332693	0.912822	0.000963455	0.0424706	0.778321	0.179071	0.524365	0.922735	0.217374	0.755127	1.08219	92528.9	108932	99139.7	95936.1	82931.2	95529.4	105964	111290	107853	81042.1	88311.7	83790.7	95	95	95	1
XP_751125.1	Aspergillus fumigatus Af293	Golgi transport complex subunit Cog6, putative	10	0.122444	0.18778	0.869107	0.335127	0.481334	1.12904	0.179231	0.52431	1.22542	0.243279	0.773522	0.943292	135701	111503	114331	112270	100263	100890	120505	93532.5	83409.3	108740	115494	107737	26	26	26	1
XP_753891.1	Aspergillus fumigatus Af293	Rho guanyl nucleotide exchange factor, putative	9	0.944381	0.970826	0.997447	0.295579	0.430053	0.881128	0.179586	0.525114	0.926802	0.657612	0.938338	1.04915	65751.8	73463.6	69662.7	69086.1	71040.1	68038.7	75801.1	70434.4	79169.8	77849.7	67278.5	55208.2	48	48	48	1
XP_748197.1	Aspergillus fumigatus Af293	NADH-dependent flavin oxidoreductase, putative	11	0.47267	0.607027	1.0294	0.628982	0.764923	1.02027	0.179622	0.52479	0.941289	0.243618	0.772499	0.949715	94141.2	96242.1	86581.3	97004.6	91737.7	96157	95398.5	101572	97069.8	94914.7	98873.7	106445	72	72	72	1
XP_750144.1	Aspergillus fumigatus Af293	signal recognition particle, putative	23	0.10598	0.16662	1.04394	0.28447	0.418297	1.05674	0.179901	0.525679	1.01755	0.918982	0.988686	1.00522	173403	169665	175112	173976	182086	185021	171306	168212	169694	170020	173265	195882	296	296	296	1
XP_746894.1	Aspergillus fumigatus Af293	conserved hypothetical protein	31	0.00178575	0.0395636	0.790224	0.00219044	0.054375	0.684093	0.18	0.525585	0.938385	0.176465	0.768176	1.08397	781124	798936	744976	619625	633782	584194	873726	827207	778469	593309	585368	518640	671	671	671	1
XP_752027.1	Aspergillus fumigatus Af293	conserved hypothetical protein	7	0.144627	0.21355	1.12794	0.376781	0.52897	0.749595	0.180061	0.525516	0.879046	0.384796	0.851869	1.32273	38887.7	41305.6	44954.3	46645.1	51525.8	43114.5	49206.4	51992.1	41552.7	44422.3	49726.2	20269.9	36	36	36	1
XP_755947.1	Aspergillus fumigatus Af293	translocon-associated protein, alpha subunit, putative	7	0.00182344	0.0396905	1.11753	0.48127	0.63922	1.06781	0.18067	0.526367	1.10354	0.0764967	0.681882	1.15493	661392	649293	640726	709844	733140	737904	664719	554984	554999	685499	647838	561323	365	365	365	1
XP_751989.1	Aspergillus fumigatus Af293	RNA polymerase II mediator complex component Med8, putative	6	0.380288	0.496514	0.598935	0.702218	0.820486	0.875641	0.180679	0.525944	1.41777	0.959839	0.993806	0.969748	44533.1	40571.6	30154.8	34353.6	41134	8283.77	31834.1	32234.6	18630.8	39622.3	19669.3	16470	7	7	7	1
XP_752803.1	Aspergillus fumigatus Af293	ABC transporter, putative	56	0.776402	0.869641	1.01342	0.169435	0.28395	1.10563	0.18074	0.525522	1.11444	0.546498	0.914736	1.0215	257952	253293	287262	263065	279998	265211	264740	232006	220779	277549	257586	256352	960	902	960	1
XP_747723.1	Aspergillus fumigatus Af293	malate synthase AcuE	32	0.585298	0.719239	1.05457	0.714445	0.82815	0.966814	0.181246	0.526653	0.856241	0.434599	0.878915	0.933962	330367	332698	265702	294819	331595	350354	347826	330154	405111	308798	375038	363022	645	645	645	1
XP_748729.1	Aspergillus fumigatus Af293	rRNA processing protein Bystin, putative	21	0.0874438	0.144146	1.11156	0.2008	0.323775	0.887976	0.181247	0.526231	0.885693	0.113007	0.707131	1.1087	178850	196961	174543	192863	213007	205555	231888	206410	184890	171128	197831	183025	232	232	232	1
XP_749703.1	Aspergillus fumigatus Af293	Rho	6	0.403066	0.526294	1.09759	0.0297515	0.102697	0.716272	0.181328	0.526117	0.839945	0.0518181	0.674984	1.2871	425909	595380	520609	540579	581765	555060	582630	574811	665200	477638	472070	363078	142	142	142	1
XP_754620.1	Aspergillus fumigatus Af293	conserved hypothetical protein	8	0.0877915	0.144111	0.731682	0.0628596	0.145563	0.757387	0.181518	0.526317	0.868007	0.314175	0.803597	0.838547	65883.1	59085.3	77967.7	40241.6	49628.9	59528.6	72926.6	77507.1	82105.3	48116	61523.4	68111.9	67	67	67	1
XP_751304.1	Aspergillus fumigatus Af293	FAD binding domain protein	3	0.107583	0.168482	1.28833	0.00386137	0.0593026	0.587037	0.18161	0.526139	0.821403	0.00277393	0.581684	1.80268	25965	36592.9	38019.6	41765.4	41901.8	44139.5	39339.2	40482.1	40929.4	23922	27326.2	20171.7	13	13	13	0.9999
XP_753466.1	Aspergillus fumigatus Af293	mitochondrial carrier protein (Pet8), putative	11	0.00418338	0.0356667	1.43673	0.545117	0.699139	1.09422	0.182493	0.528077	0.867185	0.342613	0.821272	1.13863	69369	76964.1	64780.3	95364.1	107836	99740.3	93231.6	77804.6	73112.5	84423.1	110276	74633	85	85	85	1
XP_749718.1	Aspergillus fumigatus Af293	Golgi transport complex subunit COG4	11	0.166847	0.238622	1.72882	0.802639	0.885944	0.873918	0.182672	0.528134	0.573246	0.810264	0.976168	1.13402	18777.7	51396.9	47383	58045.8	63855.2	63750.5	70951.8	70151.8	48772.8	69238.9	21262.4	110060	41	41	41	1
XP_755190.1	Aspergillus fumigatus Af293	conserved hypothetical protein	25	0.0399338	0.0802293	1.09191	0.708963	0.824824	0.979425	0.18272	0.527885	0.924867	0.425639	0.868448	1.03109	90126.6	94145.6	90123.3	98395.8	104921	96430.1	103845	103267	90137.6	97251.6	92816.3	100611	334	334	334	1
XP_752054.1	Aspergillus fumigatus Af293	pyruvate carboxylase, putative	76	0.10084	0.16085	1.08371	0.145582	0.252918	1.07613	0.182804	0.528057	1.03483	0.466481	0.886439	1.04212	2214065	2252694	2158286	2446620	2509789	2231185	2114930	2205975	2082065	2471553	2208937	2217331	3011	3011	3011	1
XP_752533.1	Aspergillus fumigatus Af293	small nuclear ribonucleoprotein Lsm8, putative	3	0.13679	0.204886	1.47151	0.253019	0.381774	1.11392	0.182964	0.528162	0.728912	0.738494	0.955867	0.962912	27571.5	17170.4	32102.6	42987.9	31826.7	35394.5	36204.4	35663.6	30392.8	34438.9	42107	37403.2	19	19	19	0.9999
XP_747958.2	Aspergillus fumigatus Af293	alkaline phosphatase family protein	5	0.308647	0.407776	0.63899	0.235748	0.361517	0.738191	0.183255	0.528436	0.693054	0.248128	0.77363	0.599918	42101.7	46846.8	23936.1	16120.5	17366.9	43996.2	60656.8	53100	44031	54226.8	38376.7	27413	13	13	13	1
XP_750358.1	Aspergillus fumigatus Af293	conserved hypothetical protein	8	0.196544	0.274307	0.63632	0.23957	0.365664	0.428316	0.18339	0.528321	0.631522	0.92264	0.989449	0.938208	25953.7	45107	17193.5	14756.8	17826.5	19714.2	44518.4	38251.1	46931	50322.6	6103.63	20445	16	16	16	1
XP_751597.1	Aspergillus fumigatus Af293	mitochondrial carrier protein, putative	8	0.0100057	0.042841	1.12237	0.104519	0.194511	2.21885	0.183508	0.528451	1.80968	0.41127	0.86382	0.915399	37068.9	35691	37254	41695.6	39485.4	42327.6	19803.1	10817.6	38821.3	42158.9	39826.2	54108	26	26	26	1
XP_747718.1	Aspergillus fumigatus Af293	citrate synthase Cit1, putative	16	0.198123	0.275789	1.23291	0.892644	0.940302	0.962674	0.183728	0.528759	0.788621	0.971091	0.99472	1.01	78637	103965	100867	112102	98409.2	140090	105394	105836	150734	71612.9	152705	137167	187	187	187	1
XP_748978.2	Aspergillus fumigatus Af293	splicing factor u2af large subunit	18	0.0729849	0.123968	0.747602	0.817719	0.895907	0.95653	0.184561	0.530861	1.36317	0.554258	0.915792	1.06542	214137	317494	282666	208789	189469	202986	168656	267483	168172	162756	224265	181907	190	190	190	1
XP_752052.1	Aspergillus fumigatus Af293	60S ribosomal protein L11	14	0.00799615	0.0408961	1.30388	0.091654	0.18171	1.17886	0.184844	0.530761	0.900744	0.956838	0.993806	0.996275	4518536	4771320	4273072	5948180	6316870	5435084	5513362	5051138	4526548	6276545	6118637	5377483	731	731	731	1
XP_752110.1	Aspergillus fumigatus Af293	ATP dependent RNA helicase (Dob1), putative	45	0.19245	0.268615	1.05379	0.251367	0.380881	0.962001	0.184932	0.530663	0.95349	0.254139	0.780673	1.04446	163751	156453	157693	160175	177669	166123	174897	166853	159704	157061	163702	161375	485	485	485	1
XP_747195.1	Aspergillus fumigatus Af293	alanyl-tRNA synthetase, putative	63	0.030434	0.0680854	0.939842	0.015736	0.0784921	0.853128	0.185234	0.530896	0.960459	0.188844	0.756796	1.05808	710102	757568	734990	690409	692838	686199	765991	785981	741227	675762	675352	607164	1551	1551	1551	1
XP_752520.1	Aspergillus fumigatus Af293	CORD and CS domain protein	16	0.023865	0.061801	0.883904	0.0209461	0.0867169	0.837305	0.18525	0.530568	0.912987	0.0909293	0.696538	0.963798	5859761	6057747	6549511	5417400	5548255	5341559	6836608	7237011	6174553	5660339	5749525	5510388	304	304	304	1
XP_755681.1	Aspergillus fumigatus Af293	conserved hypothetical protein	10	0.267434	0.357735	0.849987	0.121744	0.22329	0.498205	0.185262	0.530148	0.947916	0.270194	0.784048	1.61724	92870.7	100347	96694.6	87769.8	64535.9	97696	96946	104571	104361	64743.9	80078.2	25234	45	45	45	1
XP_749486.1	Aspergillus fumigatus Af293	pheromone processing carboxypeptidase (Sxa2), putative	13	0.0641771	0.113011	1.31986	0.0359784	0.113227	1.53977	0.185405	0.53003	1.18137	0.934072	0.992452	1.01265	98262.8	127993	134084	145724	153682	173134	98099.9	108790	95837.6	158103	193494	122054	184	184	184	1
XP_755077.1	Aspergillus fumigatus Af293	pre-mRNA splicing factor (Srp1), putative	15	0.357094	0.466289	0.637404	0.368141	0.52094	1.63184	0.185585	0.530196	2.54967	0.988949	0.997838	0.99591	519796	2272641	1304674	784288	667610	762276	548257	804523	210810	439358	1110764	827962	221	221	221	1
XP_748085.1	Aspergillus fumigatus Af293	histone acetylase complex subunit Paf400, putative	71	0.147309	0.216605	1.03466	0.544676	0.698899	0.986117	0.18586	0.530667	0.961619	0.568317	0.918455	1.00896	107919	107833	103226	111931	107479	110600	109576	107412	114778	107646	108822	110584	461	461	461	1
XP_751206.1	Aspergillus fumigatus Af293	GTP-binding nuclear protein Ran, putative	20	0.04097	0.0813991	1.07614	0.97327	0.984249	0.996912	0.186405	0.532	0.929088	0.971686	0.994657	1.00293	1829370	1971398	1942360	2076007	2080511	2021241	2099654	2181892	1906574	2161164	2268792	1764913	814	814	814	1
XP_751559.1	Aspergillus fumigatus Af293	Phosphoserine phosphatase, putative	10	0.37292	0.487104	0.908765	0.0791956	0.16512	0.804332	0.186834	0.532825	0.939531	0.663622	0.940675	1.06152	199447	212981	196511	178536	160065	219223	224877	220016	203434	145713	188161	191029	194	194	194	1
XP_754953.1	Aspergillus fumigatus Af293	ATP sulphurylase	40	0.000636153	0.0337949	1.19212	0.0538246	0.135247	1.11605	0.186841	0.532406	0.939444	0.876128	0.987794	1.00347	2020915	2051024	2018474	2418269	2495073	2349148	2325425	2130691	2036605	2379074	2467540	2389521	1604	1604	1604	1
XP_751302.1	Aspergillus fumigatus Af293	flavin-binding monooxygenase-like protein	7	0.456711	0.588289	0.883591	0.00717541	0.0595974	0.777102	0.186881	0.531987	0.815921	0.467219	0.887238	0.927729	96914.2	77716	63238.6	76975.9	58220.9	73316.2	90638.4	94929.1	101912	69495.2	75246.4	78691.8	26	26	26	1
XP_751157.1	Aspergillus fumigatus Af293	NADH-ubiquinone oxidoreductase 39 kDa subunit, putative	29	0.00327656	0.0375968	1.08432	0.893969	0.939973	0.99228	0.187471	0.533617	0.926372	0.692708	0.935807	1.01229	813386	815275	798999	859462	893169	879942	930876	899963	795563	894163	885637	822284	1053	1053	1053	1
XP_750346.1	Aspergillus fumigatus Af293	Peptidase family M28 family	6	0.166796	0.238684	0.582338	0.735955	0.841763	1.14702	0.187588	0.533308	1.75882	0.760234	0.963879	0.892946	59198.5	35765.7	61391.8	17236.3	37936.6	39256.5	25119	18266.8	52067.1	21394.7	42852.7	39323.6	25	25	25	1
XP_746795.1	Aspergillus fumigatus Af293	thiosulfate sulfurtransferase, putative	17	6.17466e-05	0.0203333	0.699295	0.0192434	0.0833333	0.823173	0.187641	0.53289	1.08906	0.00353273	0.51	0.925173	189752	180826	180476	125609	130948	128745	155890	165659	185640	137929	139696	138784	125	125	125	1
XP_750305.1	Aspergillus fumigatus Af293	GTP binding protein, putative	16	0.138254	0.205637	0.948727	0.386804	0.541563	1.03342	0.187936	0.533096	1.06604	0.302658	0.792944	0.978671	387674	397603	361928	365853	361465	360237	343215	354347	378640	382926	368039	360614	216	216	216	1
XP_752510.1	Aspergillus fumigatus Af293	myosin class II heavy chain (MHC), putative	44	0.0105849	0.0434641	0.889243	0.0140881	0.0762458	0.848356	0.188045	0.53302	0.971465	0.698764	0.937815	1.01829	184206	191081	189874	174529	160990	167256	190486	199478	191844	166371	153582	174190	323	323	323	1
XP_750761.1	Aspergillus fumigatus Af293	5'-methylthioadenosine phosphorylase (Meu1), putative	19	0.0371846	0.0770856	1.25636	0.461457	0.619435	1.07181	0.188057	0.532604	0.883705	0.688979	0.93664	1.03587	777845	992836	927668	1154248	1123527	1095539	1071181	983530	985348	1071433	1254977	950602	420	420	420	1
XP_752758.1	Aspergillus fumigatus Af293	snoRNP assembly factor Naf1, putative	11	0.390684	0.51045	0.947842	0.437261	0.594311	1.14832	0.188073	0.532359	1.11139	0.61022	0.934586	0.917359	57525.4	49317.6	53260.6	51632.5	52733	47257.4	51382.3	49205.9	43535.2	47171.1	47321.3	74666.1	58	58	58	1
XP_748987.1	Aspergillus fumigatus Af293	mitochondrial carrier protein, putative	39	0.0972083	0.156061	1.06496	0.134147	0.237645	1.08804	0.188194	0.532184	1.04295	0.681151	0.937423	1.02083	859351	853270	811630	926222	905365	857193	826517	817925	775993	946127	823267	867487	1020	1020	1020	1
XP_755760.1	Aspergillus fumigatus Af293	actin-binding protein, putative	42	0.073759	0.124587	0.936856	0.492774	0.651505	0.956013	0.188266	0.531769	1.08431	0.213125	0.752194	1.06258	539960	568831	584379	520225	543423	522069	555758	531372	476760	522276	460895	511062	791	791	791	1
XP_751512.1	Aspergillus fumigatus Af293	endosomal cargo receptor (Erv25), putative	14	0.057635	0.105322	1.10725	0.0252637	0.0975592	1.24999	0.188486	0.531623	1.07142	0.438347	0.878303	0.949078	272668	301387	269308	311866	302532	318427	273540	262303	250786	332742	359587	293718	318	318	318	1
XP_746930.1	Aspergillus fumigatus Af293	cytidine deaminase, putative	6	0.145635	0.214426	1.36166	0.70761	0.823993	0.94569	0.188573	0.531545	0.767735	0.523681	0.907721	1.10543	126648	223090	181532	251032	216162	238634	218175	234799	221257	218400	265174	165524	122	122	122	1
XP_746653.1	Aspergillus fumigatus Af293	calcium permease family membrane transporter	7	0.030404	0.0681581	0.821783	0.00998954	0.065577	0.828442	0.188864	0.531826	0.930953	0.231913	0.766753	0.92347	104260	101547	93085.9	83723.7	74433.2	87766.2	109840	110356	100769	85391.2	86874.8	93619.4	79	79	79	1
XP_753921.1	Aspergillus fumigatus Af293	zinc finger protein gcs1	17	0.00180505	0.0390898	0.77443	0.00895591	0.0622346	0.785347	0.188884	0.531521	1.04754	0.580883	0.925517	1.03298	148746	143481	136738	113396	105343	113468	137394	139746	132223	100666	103716	117779	184	184	184	1
XP_754885.1	Aspergillus fumigatus Af293	conserved hypothetical protein	3	0.833521	0.90525	1.08962	0.657608	0.788292	0.86775	0.189176	0.531571	0.639266	0.605755	0.933985	0.802716	17453.2	24419.5	9429.5	13949	29200.4	12764.2	25108	26995.6	22696	13064.9	21383.3	35979.8	6	6	6	0.9971
XP_747629.1	Aspergillus fumigatus Af293	camp independent regulatory protein	8	0.136849	0.20466	1.06581	0.75597	0.853642	0.972122	0.189902	0.533025	0.90468	0.907496	0.991092	0.991864	48428.6	50383.5	45006.9	50648	51983.7	50498	55476.5	47506.7	56275.6	45409.5	56622.5	52992.1	46	46	46	1
XP_748951.1	Aspergillus fumigatus Af293	phospholipase PldA, putative	24	0.100993	0.160902	0.911719	0.152831	0.262414	0.900066	0.189943	0.532673	0.916663	0.206224	0.759096	0.928531	79865.6	70686.6	74611.2	69866.3	64961.4	70333.2	84615.1	75165.9	85980.9	68970.5	79642.4	72591.5	185	184	185	1
XP_753536.1	Aspergillus fumigatus Af293	DNA-directed RNA polymerases i, ii, and iii 145 kDa polypeptide	5	0.119724	0.183063	1.24062	0.452502	0.609371	0.840588	0.190275	0.532967	0.822677	0.38797	0.852905	1.21419	148783	202627	184339	200229	245780	215630	254529	198258	197794	192688	243251	126480	82	82	82	1
XP_753674.1	Aspergillus fumigatus Af293	small monomeric	8	0.263346	0.352871	0.835484	0.0818263	0.169608	0.619811	0.190443	0.532874	0.857611	0.560832	0.917163	1.15603	57514.1	79293.3	69587.1	65138.8	46639.2	60920.5	75218.3	80857.1	82723.1	52976.5	67436.3	33532.8	89	89	89	1
XP_746789.1	Aspergillus fumigatus Af293	opsin, putative	2	0.82518	0.89875	1.12071	0.0965113	0.186637	2.90616	0.190578	0.532796	2.19764	0.745619	0.957301	0.847485	79182.5	15164	38781.9	45989.6	36773	38758.5	21561.9	13156	15466.5	55458.4	19696.5	98583.2	7	7	7	0.9991
XP_746722.1	Aspergillus fumigatus Af293	conserved hypothetical protein	3	0.344575	0.448631	0.733444	0.0402983	0.120807	0.251467	0.190821	0.533553	0.721359	0.213804	0.750994	2.10396	77288.4	126473	143374	110650	53479.8	93442	135503	182443	151026	16620.9	77931.7	45835.4	10	10	10	0.9991
XP_747271.1	Aspergillus fumigatus Af293	3-hydroxyanthranilate 3,4-dioxygenase Bna1, putative	10	0.0245817	0.0623035	0.783072	0.000387244	0.0393939	0.740861	0.190971	0.53366	0.931722	0.810206	0.976361	0.984807	242436	264479	274342	222557	182060	208465	275704	268815	293445	204887	205427	210118	152	152	152	1
XP_753699.1	Aspergillus fumigatus Af293	carbonyl reductase, putative	20	0.00428154	0.0358689	1.2708	0.00139322	0.0474286	1.32716	0.191165	0.533875	1.07927	0.254558	0.780766	1.03344	1329698	1414958	1504317	1809463	1855082	1730413	1372001	1334791	1229356	1772131	1755077	1692081	428	428	428	1
XP_753866.1	Aspergillus fumigatus Af293	conserved hypothetical protein	2	0.9266	0.960411	1.00659	0.326781	0.470513	0.906753	0.191233	0.534068	0.892655	0.918382	0.989138	0.990943	96880.4	91573.8	83229.8	93217.1	82601.8	97805.4	110756	102920	91068.5	80377.1	97726.2	98527.7	7	7	7	0.9996
XP_755070.2	Aspergillus fumigatus Af293	COP9 subunit 3, putative	17	0.0551659	0.10209	1.10443	0.293492	0.42905	0.886065	0.191238	0.533656	0.891922	0.246436	0.771123	1.11173	93175.7	97053.1	87622.2	98431.3	106270	102046	117538	93686.1	101412	91522	104883	80930.4	221	221	221	1
XP_752236.1	Aspergillus fumigatus Af293	U3 small nucleolar ribonucleoprotein protein Mpp10	21	0.269963	0.360391	0.952011	0.0259875	0.0997227	0.836935	0.19135	0.533544	0.927482	0.279808	0.78542	1.05501	81606.6	77402.9	86758.9	75912.7	76908.9	80990	86604.4	94381	84034.2	69046.1	74040.9	78767.1	205	205	205	1
XP_755820.1	Aspergillus fumigatus Af293	transcription initiation factor TFIID subunit 7, putative	3	0.949433	0.974288	0.991506	0.880985	0.934145	0.966445	0.191644	0.534374	1.4277	0.0196917	0.707916	1.46472	26319.8	31732.2	22660.8	24224.6	31038.2	24535.3	12408.6	23604.8	22203.5	17804.1	20187.8	16333.1	6	6	6	0.9991
XP_750203.1	Aspergillus fumigatus Af293	HMG box protein, putative	13	0.413475	0.53879	0.870688	0.65706	0.788538	1.15828	0.191644	0.533963	1.5184	0.572484	0.921065	1.14139	287883	482550	371155	317344	312606	343062	268773	340046	161150	186365	372753	329467	250	250	250	1
XP_755884.1	Aspergillus fumigatus Af293	TPR domain protein	11	0.255358	0.344171	1.07758	0.0748067	0.159941	0.815591	0.191689	0.533553	0.908817	0.0892374	0.695804	1.20076	58856.8	56545.6	62641.2	62780.7	59420.9	69927	66197.7	70958.1	59126.4	59887.2	52882	47577.5	94	94	94	1
XP_746670.1	Aspergillus fumigatus Af293	DNA-directed RNA polymerases N/8 kDa subunit superfamily	3	0.559589	0.694833	0.930474	0.00847709	0.0620578	0.74962	0.191867	0.533438	0.895207	0.380021	0.851773	1.11119	104767	116412	133578	128400	94418.8	108254	132139	132290	129906	101720	107078	87821.1	62	62	62	1
XP_747868.1	Aspergillus fumigatus Af293	ATP synthase subunit E, putative	15	0.993316	0.995437	0.9997	0.0160096	0.0784844	1.26736	0.191954	0.533421	1.10816	0.00180526	0.553333	0.874128	452649	406900	415667	429531	426410	417620	350747	376463	426056	494948	470228	492053	350	350	350	1
XP_752828.1	Aspergillus fumigatus Af293	conserved hypothetical protein	5	0.587872	0.721863	1.04161	0.260222	0.389398	0.93375	0.192104	0.533405	0.878337	0.479173	0.892028	0.979795	53449.7	64759.1	65615.8	65834.8	61390.3	63505.7	67167.4	76584.4	65158.6	66219.7	65663.1	62755.8	60	60	60	1
XP_746395.1	Aspergillus fumigatus Af293	aryl-alcohol dehydrogenase, putative	19	0.340327	0.443383	0.873147	0.520814	0.678082	1.20034	0.192114	0.532996	1.50934	0.476976	0.892496	1.09792	165292	145636	210502	134690	167902	149159	135561	153381	70878.1	164682	116568	132770	173	173	173	1
XP_750234.2	Aspergillus fumigatus Af293	dynein light chain type 1, putative	7	0.0580553	0.105796	0.828495	0.039172	0.119667	0.75295	0.192133	0.532683	0.879933	0.724234	0.952192	0.968219	205764	245877	240508	202312	174745	195731	269730	284120	233043	170389	207654	215469	115	115	115	1
XP_752832.1	Aspergillus fumigatus Af293	tRNAHis guanylyltransferase Thg1, putative	7	0.983136	0.992784	1.00266	0.223624	0.349105	0.601182	0.192678	0.533524	0.839527	0.397634	0.852534	1.40018	42944.7	62423.4	48323.5	54420.7	47056.4	50991	60914.2	61712.9	58239.3	47242.4	55946.6	17998	34	34	34	1
XP_747766.1	Aspergillus fumigatus Af293	conserved hypothetical protein	12	0.112018	0.174352	1.15324	0.285287	0.419182	1.10266	0.192687	0.533116	0.902627	0.527007	0.908835	0.944032	118298	97381.3	101486	127320	124907	112755	114050	112964	123396	112564	130190	145440	101	101	101	1
XP_750767.1	Aspergillus fumigatus Af293	proline utilization protein PrnX, putative	12	0.187161	0.262845	0.907735	0.843865	0.912585	0.977147	0.1929	0.53299	1.16693	0.358931	0.836082	1.08404	140124	118878	132839	121226	110005	124111	107293	98555.3	131690	116177	95139.7	117544	90	83	90	1
XP_747354.1	Aspergillus fumigatus Af293	aldehyde dehydrogenase family protein	14	0.313026	0.411855	0.88439	0.097819	0.187863	0.639176	0.193112	0.533588	0.738527	0.876393	0.987748	1.02186	95427.5	105836	105056	107570	75767.2	90050.8	106370	123590	200367	76292.9	101450	88870	103	103	103	1
XP_747596.1	Aspergillus fumigatus Af293	para-aminobenzoate synthase PabaA	5	0.278933	0.37111	0.501543	0.423144	0.57906	0.697949	0.193682	0.534819	1.29519	0.918957	0.988947	0.93072	36306.7	43648.7	40793.7	34148.6	6718.92	35546.9	23039.6	32883.2	39273.2	44679.6	13072.4	17320.2	19	19	19	1
XP_755960.1	Aspergillus fumigatus Af293	cell division control protein Cdc25, putative	14	0.263204	0.35285	0.913895	0.00662643	0.0591158	0.74373	0.193987	0.534997	0.930891	0.156454	0.747962	1.14388	64656.4	68523.4	72371.1	59511.9	58222.1	70633.8	70722.5	78414.1	71674.8	59848.4	53517.4	51052.4	76	76	76	1
XP_755805.1	Aspergillus fumigatus Af293	kinesin family protein	7	0.0940405	0.15248	0.828653	0.505216	0.66166	0.886539	0.193996	0.534589	1.13156	0.755342	0.961797	1.05768	49045.6	41728.1	41767.7	31973.8	38280.1	39739.3	41888.7	34692.1	40597.9	43956.7	36075.7	25923	17	15	17	1
XP_755189.2	Aspergillus fumigatus Af293	peptidyl-prolyl cis/trans isomerase	10	0.0222271	0.0588377	0.712249	0.0186105	0.0813048	0.62751	0.194117	0.534554	0.920023	0.778351	0.968894	1.04426	352670	391881	347684	298519	222051	261926	367220	403149	416791	198933	294167	260538	119	119	119	1
XP_754214.1	Aspergillus fumigatus Af293	nicotinamide N-methyltransferase Nnt1, putative	9	0.333732	0.435859	1.02885	0.618277	0.75821	0.963203	0.194162	0.534148	0.945925	0.881425	0.988202	1.01039	82484	80637.2	83239.5	88652.6	82357	82583.6	92699.6	85508.6	82523.5	78061.1	79399.7	94311.6	115	115	115	1
XP_752698.1	Aspergillus fumigatus Af293	mannose-6-phosphate isomerase, class I	22	0.246648	0.332893	1.16773	0.24224	0.369621	0.85563	0.194566	0.534465	0.830037	0.312993	0.804681	1.1328	271153	375897	381291	380972	416000	390467	420211	432055	374319	393039	382369	283262	502	502	502	1
XP_750401.1	Aspergillus fumigatus Af293	mitochondrial translation initiation factor, putative	24	0.00027219	0.0278182	0.706001	0.00036601	0.040625	0.647835	0.194616	0.534059	0.966972	0.293503	0.794834	1.05379	379503	397347	381441	280777	259338	277972	401816	408800	387286	247298	277370	252164	153	153	153	1
XP_748722.1	Aspergillus fumigatus Af293	conserved mitochondrial protein	2	0.683637	0.801874	0.969185	0.0328143	0.108205	0.603074	0.194745	0.533888	0.87235	0.0865516	0.702686	1.40193	30451.2	34223.4	38593.7	33739.9	34029.1	31891	35863.2	38954	43368	17837.1	29375.1	25361.7	26	26	26	1
XP_752947.1	Aspergillus fumigatus Af293	RNA splicing factor (Pad-1), putative	21	0.0656578	0.114458	0.909601	0.287994	0.421472	0.904211	0.195244	0.53529	1.10228	0.18832	0.758358	1.10885	296457	336820	316609	290300	283212	289386	303062	300464	259231	241270	295155	245058	233	233	233	1
XP_750248.2	Aspergillus fumigatus Af293	SAM domain protein	17	0.687508	0.805058	1.02189	0.227802	0.353482	1.06256	0.195371	0.535103	1.10158	0.0516372	0.677654	1.05942	124014	145574	133045	132459	136880	141366	117134	116127	132095	126971	129422	131174	114	114	114	1
XP_747257.1	Aspergillus fumigatus Af293	mannosyltransferase PMTI	21	0.118294	0.180919	1.07841	0.123863	0.225383	1.11006	0.195421	0.53494	1.08218	0.297213	0.794721	1.05133	155129	161043	143408	167660	159584	167932	136447	135895	152454	164531	161533	145490	251	251	251	1
XP_751104.1	Aspergillus fumigatus Af293	succinyl-CoA:3-ketoacid-coenzyme A transferase (ScoT), putative	10	0.458527	0.590589	0.933718	0.171012	0.286316	0.82791	0.195501	0.53472	0.878604	0.939655	0.993068	0.99089	169880	144678	144965	128583	160584	140465	157226	195891	170565	129540	132717	173398	31	24	31	1
XP_748169.1	Aspergillus fumigatus Af293	MYB DNA-binding domain protein	3	0.94772	0.97263	1.0059	0.218977	0.343555	1.30397	0.195634	0.534748	1.29867	0.98761	0.996816	1.00181	24211.6	27527.3	29525.4	24229.8	27675.9	29867.5	15169	24861.8	23823.2	27114.8	23164.6	31715	22	22	22	1
XP_754614.1	Aspergillus fumigatus Af293	Dor1-like family protein	3	0.535959	0.671743	1.01852	0.511581	0.668517	0.764829	0.195711	0.534344	1.09214	0.367702	0.839861	1.4544	46136.7	49799.6	46247.1	47798.1	49250.2	47692.3	43874.3	39496.9	47070.5	47007.1	48947.4	15860.7	17	17	17	0.9997
XP_752671.1	Aspergillus fumigatus Af293	SNF2 family helicase/ATPase PasG, putative	8	0.14914	0.218441	1.09172	0.0320412	0.106825	1.2515	0.195775	0.534029	1.1076	0.558568	0.915845	0.96619	383755	338470	363309	419275	374035	391535	350697	292910	338091	375019	427269	424854	40	40	40	1
XP_001481656.1	Aspergillus fumigatus Af293	translation elongation factor EF-1 subunit, putative	24	0.00174732	0.0389512	0.907868	0.44485	0.601111	0.963255	0.195961	0.533716	1.057	0.902876	0.990781	0.996228	193486	197360	200307	181225	176160	179287	196447	174752	188671	178664	188872	171550	197	197	197	1
XP_754194.1	Aspergillus fumigatus Af293	Golgi transport protein Sly1, putative	33	0.0241285	0.0617267	0.921381	0.124331	0.225931	0.943784	0.196071	0.533555	1.03348	0.789552	0.969188	1.00895	187799	181623	175224	165978	164640	171076	176710	173115	176994	172180	156577	168834	348	348	348	1
XP_753759.1	Aspergillus fumigatus Af293	cell wall glucanase, putative	7	0.419137	0.54659	0.809128	0.212318	0.334866	1.39547	0.19627	0.533584	1.4114	0.446376	0.880171	0.818362	36236.2	33801.4	36707.6	18336.1	40222.9	32292.8	36311.8	26020.1	16925	36849.9	32385.4	36413.6	31	31	31	1
XP_748125.1	Aspergillus fumigatus Af293	nuclear condensin complex subunit 3, putative	24	0.607275	0.737035	0.973579	0.00623804	0.0589451	0.867172	0.196369	0.533701	0.932481	0.222185	0.758931	1.0469	71395.2	82511.6	79708.3	76879.4	72697.2	77530.7	85212.8	81945.4	82935	75808.4	71274.6	69892.6	180	180	180	1
XP_752544.1	Aspergillus fumigatus Af293	conserved hypothetical protein	19	0.0667597	0.11519	0.840335	0.804418	0.886576	0.976964	0.196462	0.533648	1.16113	0.983583	0.995896	0.998745	214401	207553	251907	175526	191995	197388	224152	177136	180345	182634	177651	205798	269	269	269	1
XP_748002.1	Aspergillus fumigatus Af293	exopolyphosphatase, putative	9	0.0802422	0.133401	0.81746	0.58341	0.72948	0.915979	0.1966	0.533397	1.12822	0.966218	0.994362	1.00687	40540.7	31980.5	32231.3	30166.6	26478.5	28578.1	30477.2	30998.7	30800.3	23865.7	24796.6	37788.8	35	35	35	1
XP_755044.2	Aspergillus fumigatus Af293	spindle poison sensitivity protein Scp3, putative	17	0.422701	0.551397	1.06706	0.0171403	0.0802235	1.12706	0.19708	0.534021	1.11279	0.241147	0.774332	1.05355	114140	91853.8	97984.7	113921	101342	108111	91645.5	94117.1	86432.2	103872	98748.7	104056	109	109	109	1
XP_749680.1	Aspergillus fumigatus Af293	mitochondrial F1F0 ATP synthase subunit F (Atp17), putative	5	0.324101	0.425575	1.15755	0.00292709	0.0580506	1.74438	0.197123	0.53386	1.25967	0.0163491	0.699848	0.8359	1750491	1274136	1148196	1586320	1665373	1503510	1189402	928149	1160579	1948495	1770793	1970965	169	169	169	1
XP_752282.1	Aspergillus fumigatus Af293	rhomboid family protein, putative	11	0.101813	0.161556	0.92143	0.142217	0.247688	0.882133	0.19765	0.535148	0.903575	0.25604	0.782162	0.943826	72743.2	75725.1	81594.5	69450.9	73316.2	69056.1	87216.4	91873.4	76034.8	76580.3	69260.5	78849.9	83	83	83	1
XP_750987.1	Aspergillus fumigatus Af293	cell morphogenesis protein (PAG1), putative	9	0.315556	0.41424	1.16785	0.264737	0.395595	0.344835	0.197778	0.535041	0.792386	0.294458	0.793189	2.68358	474750	726683	662561	661034	756235	728316	851702	814932	661936	599489	606296	51831.2	23	23	23	1
XP_747636.1	Aspergillus fumigatus Af293	mitochondrion biogenesis protein Mmm1, putative	5	0.99465	0.99643	1.00494	0.0184898	0.0813071	0.717622	0.198085	0.53518	0.532781	0.630278	0.937596	0.74609	17393.4	56859.7	59484.9	71147.1	12750.9	65813.3	67885.4	83860.5	68330.7	57906.3	50896.7	48777.8	27	27	27	1
XP_747355.1	Aspergillus fumigatus Af293	fumarate reductase Osm1, putative	39	0.198166	0.275708	0.914687	0.0558034	0.137905	0.902843	0.198694	0.536769	0.916594	0.138732	0.727463	0.928618	500910	491901	423076	419939	422356	449788	515112	496620	529173	437179	464032	491082	903	903	903	1
XP_749356.1	Aspergillus fumigatus Af293	conserved hypothetical protein	8	0.0792657	0.13113	0.749219	0.499454	0.655605	0.861188	0.198903	0.53681	1.36072	0.249198	0.774384	1.1838	68583.5	101136	91329.4	67455	59285.4	66619.6	67661.9	80334.3	46257.7	43159.6	63860.1	58266.2	111	111	111	1
XP_748070.1	Aspergillus fumigatus Af293	phosphoribosylformylglycinamidine synthase	70	0.63528	0.76206	0.982493	0.137208	0.242726	0.866722	0.199031	0.536747	0.93841	0.448581	0.880925	1.06376	480948	530127	500248	514396	485898	483961	530076	567969	512652	487027	510184	404432	1350	1350	1350	1
XP_755643.1	Aspergillus fumigatus Af293	cytochrome c	10	0.00111934	0.0339225	0.706785	0.723198	0.834051	0.948823	0.199188	0.536955	1.20193	0.242088	0.773864	0.895329	2334827	2462486	2307592	1797734	1597706	1630896	2484175	1820179	1689852	1669932	1829305	2136564	303	303	303	1
XP_748086.1	Aspergillus fumigatus Af293	protein phosphatase regulatory subunit (Ssc1), putative	17	0.109513	0.170705	1.09066	0.569077	0.718331	1.03667	0.199578	0.537715	0.928479	0.682272	0.938093	0.976831	297803	268084	278898	302092	294548	324648	317862	310913	281483	287627	324608	331941	202	202	202	1
XP_748111.1	Aspergillus fumigatus Af293	alpha/beta hydrolase, putative	5	0.934089	0.962975	1.0608	0.0355439	0.112841	0.335241	0.199855	0.538364	0.524806	0.465237	0.885753	1.66063	15980.7	59483.3	44998.9	62519.2	12644.6	64590.9	72430.7	79088.8	51660.6	16084.8	16185.2	42828.6	15	15	15	1
XP_753266.1	Aspergillus fumigatus Af293	SNF7 family protein	3	0.309912	0.408792	0.305102	0.105321	0.195576	0.144175	0.199938	0.53804	1.25773	0.5151	0.907963	2.6616	317689	402336	307117	281950	13531.9	292213	233420	244950	345080	12556	241134	19529.6	18	18	18	0.9991
XP_753317.1	Aspergillus fumigatus Af293	mitochondrial DNA helicase (Pif1), putative	3	0.445234	0.576012	1.1076	0.681894	0.806869	1.2485	0.199954	0.537729	1.80635	0.243421	0.7735	1.60249	35644.1	41161.9	50139.5	43360.3	53316.2	43237.4	15988.5	15969.5	48883.1	42509.2	38699.1	14765.4	23	23	23	0.9991
XP_751108.1	Aspergillus fumigatus Af293	RNP domain protein	25	0.0846811	0.140634	0.91662	0.398629	0.553074	0.971518	0.200014	0.537784	1.05486	0.896524	0.989555	0.995253	833125	888940	820270	786167	734308	810428	792446	842104	775567	758182	806831	775803	702	702	702	1
XP_747574.1	Aspergillus fumigatus Af293	DNA replication factor C subunit Rfc4, putative	13	0.32939	0.431013	0.93864	0.213612	0.336051	0.900538	0.200426	0.538978	0.941195	0.826603	0.978612	0.981017	133162	116572	126581	125944	108991	118378	133703	131035	134516	107735	116683	136913	90	90	90	1
XP_755917.1	Aspergillus fumigatus Af293	SNARE complex subunit (Syn8), putative	6	0.0118898	0.0457929	0.831063	0.11351	0.208844	0.853217	0.200685	0.538889	0.88839	0.0313998	0.72647	0.865323	92139.6	104114	99003.4	80537.8	85450.7	79212	96541.3	116683	120247	89545.8	92426.8	101655	33	33	33	1
XP_751789.1	Aspergillus fumigatus Af293	3-demethylubiquinone-9 3-methyltransferase	10	0.00253149	0.0396059	1.06354	0.448509	0.605334	0.892676	0.200727	0.538546	0.961028	0.366479	0.838238	1.14497	148059	149848	146555	155565	158933	158204	161930	149026	151806	163770	150114	105999	126	126	126	1
XP_753048.1	Aspergillus fumigatus Af293	cleavage and polyadenylation specifity factor, 73 kDa subunit, putative	15	0.195077	0.271498	1.09131	0.265307	0.39577	0.956204	0.200829	0.538408	0.946052	0.236785	0.775023	1.07972	80487	80926.7	83571.3	91360.6	80205.9	96549.6	85973.9	81492.8	91758	83225.1	81923.7	82436.2	122	122	122	1
XP_751147.1	Aspergillus fumigatus Af293	CRAL/TRIO domain protein	25	0.204696	0.284503	1.03788	0.0640051	0.146671	1.22132	0.201107	0.539324	1.11717	0.256988	0.78075	0.949377	219729	211942	228015	222466	231286	230728	211210	171266	210534	239382	225716	256769	318	318	318	1
XP_747784.1	Aspergillus fumigatus Af293	SNARE protein Snc2, putative	5	0.0330875	0.0716993	0.694788	0.127077	0.229766	0.829236	0.201153	0.539017	1.16808	0.854716	0.983487	0.978698	352632	294098	276670	221942	241293	179700	300754	237517	252026	201896	204716	248374	33	33	33	1
XP_746928.1	Aspergillus fumigatus Af293	Exocyst complex component Sec10, putative	10	0.474036	0.608356	1.05543	0.367382	0.520307	0.87258	0.201722	0.54024	0.91476	0.506708	0.905446	1.10644	43837.1	44583.4	43560.1	40864.2	51534.1	47527.9	42842.3	50537.1	51368.8	46366.6	48326.5	32976.7	36	36	36	1
XP_754970.1	Aspergillus fumigatus Af293	UBX domain protein	8	0.97228	0.986098	1.00147	0.353874	0.503613	0.943364	0.201746	0.540098	0.932431	0.850382	0.98496	0.989861	58257	55098.3	53073.9	53564.4	58794.4	54333.2	63237.6	59722.1	55642.5	59074.4	51661.6	57808.1	89	89	89	1
XP_755412.1	Aspergillus fumigatus Af293	pentatricopeptide repeat protein	18	0.00952918	0.0413056	0.884257	0.0355315	0.112979	0.813024	0.201914	0.539926	0.919451	0.999865	0.999921	1.00001	82322.6	80394	77042.4	73061.2	68756.5	70179	83106.4	96292.2	81971	71490.9	65367.6	75436.9	130	130	130	1
XP_755345.1	Aspergillus fumigatus Af293	YjeF domain protein	14	0.58972	0.722563	1.03378	0.177786	0.296451	0.870307	0.201924	0.539528	0.918169	0.367978	0.839736	1.09063	101123	121179	108437	110119	112698	118292	121807	115295	122237	121868	101040	91899.9	181	181	181	1
XP_755233.1	Aspergillus fumigatus Af293	eukaryotic translation initiation factor 5, putative	23	0.452457	0.585472	0.975302	0.0184845	0.0814526	0.919401	0.202042	0.539525	0.961568	0.501692	0.903318	1.02003	514969	515444	490857	487954	519292	477028	511125	547315	523856	483706	492715	477874	406	406	406	1
XP_748134.1	Aspergillus fumigatus Af293	NADH-ubiquinone oxidoreductase	10	0.0341416	0.0722184	0.717577	0.0113459	0.0675694	0.635121	0.202735	0.541049	0.879308	0.958969	0.993362	0.993467	959023	1001868	963205	751049	569675	799225	1096968	1286669	964438	791252	653327	674618	298	298	298	1
XP_754409.2	Aspergillus fumigatus Af293	fatty acid oxygenase PpoC, putative	11	0.933439	0.963218	0.968218	0.137512	0.242586	0.504036	0.202764	0.540769	0.475165	0.623621	0.936694	0.912757	23478.9	31620.7	10189.2	23758.2	19137.9	15100.8	22952	39563.8	77649.4	24300.7	22159.7	16767.1	14	14	14	1
XP_750804.2	Aspergillus fumigatus Af293	ubiquitin conjugating enzyme Ubc8, putative	5	0.0368274	0.0771227	0.845019	0.0436623	0.125075	0.809428	0.202888	0.541189	0.908762	0.467344	0.887049	0.948721	321036	292324	295950	275338	235056	258941	332615	367279	302935	295137	252271	263590	115	115	115	1
XP_750695.1	Aspergillus fumigatus Af293	RNP domain protein	4	0.844861	0.912174	0.987598	0.044223	0.125972	0.747581	0.202935	0.540791	0.898197	0.140062	0.720981	1.18657	109823	131872	127448	123121	116315	124151	136669	147016	126775	108448	114910	85400.8	53	53	53	1
XP_752125.1	Aspergillus fumigatus Af293	hydrolase, TatD family protein, putative	10	0.0446062	0.0861552	1.20706	0.739136	0.842369	1.01711	0.203127	0.540923	0.902112	0.193398	0.758179	1.07059	95462.5	93034.5	80805.9	104876	116868	102976	97507.1	107830	92974.1	103924	101521	97491.6	40	40	40	1
XP_749609.1	Aspergillus fumigatus Af293	WD repeat protein	24	0.0250334	0.0627473	0.908754	0.764961	0.86125	1.01512	0.20344	0.541239	1.05463	0.238254	0.777713	0.944123	100122	96892.9	91241.3	87813.1	86996	86955.4	91254.7	94472.1	87529.2	85464.7	93875.3	98385.6	181	181	181	1
XP_747331.1	Aspergillus fumigatus Af293	conserved hypothetical protein	11	0.0221536	0.0585523	0.760005	0.0010149	0.0441127	0.704129	0.203627	0.541629	0.89109	0.387593	0.853348	0.961801	71123.3	65669.1	84287	57226.5	53941.4	55983.8	81110	85366.1	80354.2	53877.3	60444.7	59643.2	108	108	108	1
XP_755192.1	Aspergillus fumigatus Af293	pyridoxine	15	0.0426276	0.0831489	0.901718	0.533769	0.689846	1.06251	0.204409	0.542827	1.14475	0.455498	0.884128	0.971517	148776	138109	143466	127450	136463	124270	147477	109797	121355	130360	130257	138810	176	176	176	1
XP_752447.1	Aspergillus fumigatus Af293	adenylylsulfate kinase	17	0.22806	0.311107	1.12012	0.137883	0.242892	0.885208	0.204442	0.542429	0.896111	0.164151	0.757425	1.13392	946296	1204376	1055105	1104184	1254448	1220065	1230216	1181036	1150150	1134722	1101546	927348	501	501	501	1
XP_754948.1	Aspergillus fumigatus Af293	ribosomal assembly complex component Ipi3, putative	12	0.0445625	0.0861214	1.11888	0.375453	0.527674	0.889677	0.204459	0.542032	0.846799	0.329559	0.810776	1.06495	73704.2	82005.2	79273.2	88094.1	83935.4	90764.1	106385	98602.5	75222.9	79271.9	91086.4	76956	96	96	96	1
XP_746702.1	Aspergillus fumigatus Af293	conserved hypothetical protein	5	0.140124	0.20689	1.58272	0.49049	0.648953	0.73112	0.20475	0.542566	0.701293	0.378503	0.8512	1.51815	28582.6	59172.3	36319.6	53149.1	80596	56854	67612.5	53720.9	49033.5	55777.3	67262.4	18552.3	26	26	26	1
XP_754317.1	Aspergillus fumigatus Af293	DUF1168 domain protein	3	0.00393598	0.0350727	0.567254	0.405101	0.560016	0.807039	0.205022	0.543023	1.33445	0.710227	0.944491	0.937965	34785.1	34109.4	28666.2	18577.1	20709.5	16137	17352.2	32222.1	25598.8	16550.1	17446.2	26056.2	10	10	10	1
XP_751844.2	Aspergillus fumigatus Af293	histone acetyltransferase subunit (Yaf9), putative	6	0.3432	0.446432	1.05113	0.765914	0.861122	1.02033	0.20507	0.542682	0.953523	0.815822	0.975647	0.982305	73562.1	71422.6	75212	79909.9	81251.4	70682.8	78553.2	79644.7	72855.7	70312.5	81118.9	84889.1	52	52	52	1
XP_752772.1	Aspergillus fumigatus Af293	diphthine synthase, putative	13	0.368543	0.48198	1.09466	0.800445	0.88489	0.974622	0.205847	0.544654	0.896299	0.953969	0.994345	1.00669	129371	136889	158305	156557	171724	136782	167708	145894	159130	150192	133608	179626	165	165	165	1
XP_746718.2	Aspergillus fumigatus Af293	37S ribosomal protein S24	14	0.638509	0.765062	1.02708	0.0947532	0.184957	1.11505	0.205851	0.544257	1.08235	0.954496	0.9942	0.996958	4486860	5147991	4561240	5147617	4679289	4739069	4211724	4627305	4263569	5030499	5099348	4490789	724	724	724	1
XP_755324.1	Aspergillus fumigatus Af293	fatty acid activator Faa4, putative	40	0.619792	0.749205	0.984922	0.0584977	0.141503	0.894036	0.205871	0.54386	0.940802	0.317845	0.806651	1.03644	558157	610023	583986	575506	586547	562805	586262	653090	623657	579807	560398	525166	1010	1010	1010	1
[truncated: 2,667 more rows]
